# Supplementary material for: Comparison of Phenotype and Genotype Virulence and Antimicrobial Factors of Salmonella Typhimurium Isolated from Human Milk
Source: MDPI journal article supplement (doi:10.3390/ijms24065135), 2023-03-07
Supplement: s1 [file s1]

**Detection:** *Salmonella Pathogenicity Islands*

| Salmonella Pathogenicity Islands |          |                         |             |                    |                                            |                |                   |                                                                                                                                                              |                           |
|----------------------------------|----------|-------------------------|-------------|--------------------|--------------------------------------------|----------------|-------------------|--------------------------------------------------------------------------------------------------------------------------------------------------------------|---------------------------|
| SPI                              | Identity | Query / Template length | Contig      | Position in contig | Organism                                   | Insertion Site | Category Function | Note                                                                                                                                                         | Accession number          |
| C63PI                            | 100      | 4000 / 4000             | 69M_SET_cns | 3006066..3010065   | Salmonella-enterica-Typhimurium-SL1344     | fhlA           | 1                 |                                                                                                                                                              | <a href="#">AF128999</a>  |
| CS54_island                      | 99.92    | 25255 / 25252           | 69M_SET_cns | 2627012..2652263   | Salmonella-enterica-Typhimurium-ATCC_14028 | xseA-yfgK      | 29                |                                                                                                                                                              | <a href="#">AF140550</a>  |
| Not_named                        | 100      | 330 / 330               | 69M_SET_cns | 1482746..1483075   | Salmonella-enterica-Enteritidis-CMCC50041  |                | 26                |                                                                                                                                                              | <a href="#">JQ071613</a>  |
| SPI-1                            | 99.96    | 2705 / 2705             | 69M_SET_cns | 3010641..3013345   | Salmonella-enterica-Typhimurium-SL1344     | fhlA/mutS      | 5                 | N.B. This record is part of a PAI which includes several records: U16278,U16303                                                                              | <a href="#">AF148689</a>  |
| SPI-1                            | 99.77    | 440 / 440               | 69M_SET_cns | 3015995..3016434   | Salmonella-enterica-Gallinarum-SGB_1       | Not_published  | 5                 |                                                                                                                                                              | <a href="#">AY956822</a>  |
| SPI-1                            | 100      | 430 / 430               | 69M_SET_cns | 3018105..3018534   | Salmonella-enterica-Gallinarum-SGE_2       | Not_published  | 5                 |                                                                                                                                                              | <a href="#">AY956823</a>  |
| SPI-1                            | 100      | 470 / 470               | 69M_SET_cns | 3026813..3027282   | Salmonella-enterica-Gallinarum-SGB_4       | Not_published  | 5                 |                                                                                                                                                              | <a href="#">AY956824</a>  |
| SPI-1                            | 99.28    | 415 / 415               | 69M_SET_cns | 3038600..3039014   | Salmonella-enterica-Gallinarum-SGB_8       | Not_published  | 5                 |                                                                                                                                                              | <a href="#">AY956825</a>  |
| SPI-1                            | 98.84    | 259 / 257               | 69M_SET_cns | 3039894..3040152   | Salmonella-enterica-Typhimurium-J4STEHO    |                | 27                |                                                                                                                                                              | <a href="#">JN982040</a>  |
| SPI-1                            | 99.43    | 3155 / 3141             | 69M_SET_cns | 3049734..3052886   | Salmonella-enterica-Typhimurium-SL1344     | fhlA/mutS      | 5                 | N.B. This record is part of a PAI which includes several records: U16278,AF148689                                                                            | <a href="#">U16303</a>    |
| SPI-12                           | 97.64    | 9345 / 11075            | 69M_SET_cns | 2342056..2351393   | Salmonella-enterica-Choleraesuis-SC_B67    | tRNA-pro       | 8                 | gij62178570:2354604-2365678 - go to <a href="http://www.paidb.re.kr/about_paidb.php">http://www.paidb.re.kr/about_paidb.php</a> for link to partial flatfile | <a href="#">NC_006905</a> |
| SPI-13                           | 99.41    | 338 / 338               | 69M_SET_cns | 3279563..3279900   | Salmonella-enterica-Gallinarum-SGD_3       | tRNA-pheV      | 9                 |                                                                                                                                                              | <a href="#">AY956832</a>  |
| SPI-13                           | 100      | 404 / 404               | 69M_SET_cns | 3278852..3279255   | Salmonella-enterica-Gallinarum-SGG_1       | tRNA-pheV      | 11                |                                                                                                                                                              | <a href="#">AY956833</a>  |

|        |       |               |             |                  |                                        |               |    |                                                                                                                                                              |                           |
|--------|-------|---------------|-------------|------------------|----------------------------------------|---------------|----|--------------------------------------------------------------------------------------------------------------------------------------------------------------|---------------------------|
| SPI-13 | 100   | 341 / 341     | 69M_SET_cns | 3277144..3277484 | Salmonella-enterica-Gallinarum-SGA_10  | tRNA-pheV     | 10 |                                                                                                                                                              | <a href="#">AY956834</a>  |
| SPI-14 | 100   | 501 / 501     | 69M_SET_cns | 926728..927228   | Salmonella-enterica-Gallinarum-SGA_8   | Not_published | 12 |                                                                                                                                                              | <a href="#">AY956835</a>  |
| SPI-14 | 99.55 | 441 / 441     | 69M_SET_cns | 932304..932744   | Salmonella-enterica-Gallinarum-SGC_8   | Not_published | 13 |                                                                                                                                                              | <a href="#">AY956836</a>  |
| SPI-2  | 98.9  | 637 / 637     | 69M_SET_cns | 1497019..1497655 | Salmonella-enterica-Gallinarum-SGB_10  | tRNA-valV     | 14 |                                                                                                                                                              | <a href="#">AY956826</a>  |
| SPI-2  | 100   | 642 / 642     | 69M_SET_cns | 1489709..1490350 | Salmonella-enterica-Gallinarum-SGC_2   | tRNA-valV     | 14 |                                                                                                                                                              | <a href="#">AY956827</a>  |
| SPI-2  | 100   | 395 / 396     | 69M_SET_cns | 1494342..1494736 | Salmonella-enterica-Gallinarum-SGC_9   | tRNA-valV     | 14 |                                                                                                                                                              | <a href="#">AY956828</a>  |
| SPI-2  | 99.76 | 425 / 425     | 69M_SET_cns | 1487684..1488108 | Salmonella-enterica-Gallinarum-SGH_1   | tRNA-valV     | 14 |                                                                                                                                                              | <a href="#">AY956829</a>  |
| SPI-2  | 99.82 | 547 / 547     | 69M_SET_cns | 1477547..1478093 | Salmonella-enterica-Gallinarum-SGD_8   | tRNA-valV     | 14 |                                                                                                                                                              | <a href="#">AY956830</a>  |
| SPI-2  | 100   | 384 / 384     | 69M_SET_cns | 1480008..1480391 | Salmonella-enterica-Typhimurium-St11   |               | 23 |                                                                                                                                                              | <a href="#">JN673272</a>  |
| SPI-2  | 100   | 1252 / 1252   | 69M_SET_cns | 1475967..1477218 | Salmonella-enterica-Typhimurium-       | tRNA-valV     | 14 | N.B. This record is part of a PAI which includes several records: AJ224892,AJ224978,U51927,X99944,X99945,Y09357                                              | <a href="#">Z95891</a>    |
| SPI-3  | 100   | 738 / 738     | 69M_SET_cns | 3965704..3966441 | Salmonella-enterica-Typhimurium-14028s | tRNA_selC     | 15 | N.B. This record is part of a PAI which includes several records: AF106566,Y13864                                                                            | <a href="#">AJ000509</a>  |
| SPI-3  | 100   | 1514 / 1514   | 69M_SET_cns | 3948169..3949682 | Salmonella-enterica-Typhimurium-14028s | tRNA_selC     | 15 | N.B. This record is part of a PAI which includes several records: AF106566,AJ000509                                                                          | <a href="#">Y13864</a>    |
| SPI-4  | 100   | 24660 / 24660 | 69M_SET_cns | 4476929..4501588 | Salmonella-enterica-Typhimurium-ST4/74 | Not_published | 17 |                                                                                                                                                              | <a href="#">AJ576316</a>  |
| SPI-5  | 100   | 9069 / 9069   | 69M_SET_cns | 1175309..1184377 | Salmonella-Typhimurium-LT2             | tRNA-serT     | 18 | gi 16763390:1175321-1184389 - go to <a href="http://www.paidb.re.kr/about_paidb.php">http://www.paidb.re.kr/about_paidb.php</a> for link to partial flatfile | <a href="#">NC_003197</a> |
| SPI-9  | 98.58 | 12647 / 15696 | 69M_SET_cns | 2831233..2843879 | Salmonella-Typhi-CT18                  | Not_published | 22 | gi 16758993:2743495-2759190 - go to <a href="http://www.paidb.re.kr/about_paidb.php">http://www.paidb.re.kr/about_paidb.php</a> for link to partial flatfile | <a href="#">NC_003198</a> |

extended output

### C63PI\_AF128999

template **TTTTGCGCGTAGGCGAACAGCGCGTCGTAATGCCCTGCACCGTTGACGCCTGTGGGCAC**  
query **TTTTGCGCGTAGGCGAACAGCGCGTCGTAATGCCCTGCACCGTTGACGCCTGTGGGCAC**

|                |                                                                                                                                  |
|----------------|----------------------------------------------------------------------------------------------------------------------------------|
| template query | TGGCTTTTCATACAGCGCGATCATTTTTTTTGATCGTCAGTTTTTTCACGAGCGATACGTTTA                                                                  |
| template query | CCAGGCATCGTGCTCTCTCCGAACATTAAGGTGTATTTATTTTACACCTTATCCCTCTTT<br>CCAGGCATCGTGCTCTCTCCGAACATTAAGGTGTATTTATTTTACACCTTATCCCTCTTT     |
| template query | AGCACTATCACTGCATATTGTCGCCATTTTCGCAAATAAGAATTATTTTCATTATCCATA<br>AGCACTATCACTGCATATTGTCGCCATTTTCGCAAATAAGAATTATTTTCATTATCCATA     |
| template query | CCTTGTGCTATATAACATAGCAAAGGCTATATTCGATGATTAATTAACCACATTGTTGCG<br>CCTTGTGCTATATAACATAGCAAAGGCTATATTCGATGATTAATTAACCACATTGTTGCG     |
| template query | AGGGATACTATGACGAATCTACATCGTCTGAAAACACTCCTGATTGCCGGTATTGTCGCG<br>AGGGATACTATGACGAATCTACATCGTCTGAAAACACTCCTGATTGCCGGTATTGTCGCG     |
| template query | ATACTCGCGCTATCGCCAGCCTATGCAAAAGAGAAATTTAAAGTTATCACCACGTTTACC<br>ATACTCGCGCTATCGCCAGCCTATGCAAAAGAGAAATTTAAAGTTATCACCACGTTTACC     |
| template query | GTTATTGCCGACATGGCGAAAAACGTGGCGGGCGACGCAGCGGAAGTCAGCTCGATTACC<br>GTTATTGCCGACATGGCGAAAAACGTGGCGGGCGACGCAGCGGAAGTCAGCTCGATTACC     |
| template query | AAACCCGGCGCTGAAATCCATGAGTATCAGCCAACGCCCGCGCATATTAACGAGCGCAG<br>AAACCCGGCGCTGAAATCCATGAGTATCAGCCAACGCCCGCGCATATTAACGAGCGCAG       |
| template query | GGGGCACAGCTTATCCTCGCGAATGGTCTGAACCTGGAGCGATGGTTCCGCCGCTTTTAT<br>GGGGCACAGCTTATCCTCGCGAATGGTCTGAACCTGGAGCGATGGTTCCGCCGCTTTTAT     |
| template query | CAGCACCTTTCGGCGTGCCGGAAGTCGTCTCTCCACCGCGCTCAAACCGATGGGCATT<br>CAGCACCTTTCGGCGTGCCGGAAGTCGTCTCTCCACCGCGCTCAAACCGATGGGCATT         |
| template query | ACCGAAGGCCCGTATAACGGTAAACCGAACCCGCACGCCTGGATGTCGGCAGAAAACGCG<br>ACCGAAGGCCCGTATAACGGTAAACCGAACCCGCACGCCTGGATGTCGGCAGAAAACGCG     |
| template query | CTGATTTATGTCGATAAATTGCGACGCCCTGGTGAAGTACGATCCGGATAATGCGCAG<br>CTGATTTATGTCGATAAATTGCGACGCCCTGGTGAAGTACGATCCGGATAATGCGCAG         |
| template query | ATCTATAAGCAAAATGCCGAACGCTATAAAGCGAAAATTCGCCAGATGGCCGATCCGTTG<br>ATCTATAAGCAAAATGCCGAACGCTATAAAGCGAAAATTCGCCAGATGGCCGATCCGTTG     |
| template query | CGTGCCGAAC TGGA AAAAATTCCCGCCGATCAGCGCTGGTTGGTCAACAGTGAAGGCGCG<br>CGTGCCGAAC TGGA AAAAATTCCCGCCGATCAGCGCTGGTTGGTCAACAGTGAAGGCGCG |
| template query | TTCTCTTACCTGGCGCGGATAAACGACATGAAAGAGCTTTATCTCTGGCCAATTAAACGCC<br>TTCTCTTACCTGGCGCGGATAAACGACATGAAAGAGCTTTATCTCTGGCCAATTAAACGCC   |
| template query | GATCAACAGGGGACGCCAAAACAGGTGCGTAAAGTGATTGATACCATTAAAAAGCACCAT<br>GATCAACAGGGGACGCCAAAACAGGTGCGTAAAGTGATTGATACCATTAAAAAGCACCAT     |
| template query | ATTCCCGCCATCTTTAGCGAGAGTACGGTTTCCGATAAACCGGCCCGTCAGGTCGCGCGT<br>ATTCCCGCATCTTTAGCGAGAGTACGGTTTCCGATAAACCGGCCCGTCAGGTCGCGCGT      |
| template query | GAATCCGGCGCGCATTATGGCGGCGTGCTGTATGTCGATTCTCTGAGCGCCGCTGACGGC<br>GAATCCGGCGCGCATTATGGCGGCGTGCTGTATGTCGATTCTCTGAGCGCCGCTGACGGC     |
| template query | CCTGTGCCAACCTATCTGGATCTGCTGCGCGTCACGACCGAAACCATCGTCAACGGCATT<br>CCTGTGCCAACCTATCTGGATCTGCTGCGCGTCACGACCGAAACCATCGTCAACGGCATT     |
| template query | AACGACGGACTGAGGAGTCAACAATGAGTCAATCTGCGATTACCGTTGATCAAGTCACGG<br>AACGACGGACTGAGGAGTCAACAATGAGTCAATCTGCGATTACCGTTGATCAAGTCACGG     |
| template query | TGACGTATCGCAACGGTCATACCGCCCTACGGGACGCCACTTTTCAGGTGCCTGGCGGTT<br>TGACGTATCGCAACGGTCATACCGCCCTACGGGACGCCACTTTTCAGGTGCCTGGCGGTT     |
| template query | CAATCGCCGCGCTGGTAGGCGTAAATGGTTCGGTAAGTCTACGTTATTTAAAGCGTTAA<br>CAATCGCCGCGCTGGTAGGCGTAAATGGTTCGGTAAGTCTACGTTATTTAAAGCGTTAA       |
| template query | TGGGCTTTGTGCATCTTGCGCAGGGCGATATCACTATCTGCAACAGTCAGTCAACAAGG<br>TGGGCTTTGTGCATCTTGCGCAGGGCGATATCACTATCTGCAACAGTCAGTCAACAAGG       |
| template       | CACTGAAAAAAACCTCATTGCTTATGTTCCGCAATCGGAAGAAGTGGACTGGTCATTTT                                                                      |

|          |                                                               |
|----------|---------------------------------------------------------------|
| query    | CACTGAAAAAAACCTCATTGGCTTATGTTCCGCAATCGGAAGAGTGGAATGGTCAATTT   |
| template | CGGTGCTGGTAGAAGATGTGGTGATGATGGGACGCTACGGCCATATGGGCTGGCTACGCC  |
| query    | CGGTGCTGGTAGAAGATGTGGTGATGATGGGACGCTACGGCCATATGGGCTGGCTACGCC  |
| template | GTCCCACTGCGCATGATCACGCCTGTGTTGACGCCGCGCTGGCGCGGGTGGATATGCAGG  |
| query    | GTCCCACTGCGCATGATCACGCCTGTGTTGACGCCGCGCTGGCGCGGGTGGATATGCAGG  |
| template | AGTATCGTCACAGGCAGATTGGCGAGCTGTCCGGCGGGCAGAAAAACGTGTGTTCTTG    |
| query    | AGTATCGTCACAGGCAGATTGGCGAGCTGTCCGGCGGGCAGAAAAACGTGTGTTCTTG    |
| template | CCAGGGCCATCGCTCAGGATGGACAGGTGATCCTGCTGGATGAACCTTTTACCGCGCTGG  |
| query    | CCAGGGCCATCGCTCAGGATGGACAGGTGATCCTGCTGGATGAACCTTTTACCGCGCTGG  |
| template | ATGTAAAAACCGAAGCGCGAATCATCGATCTACTGCGGGAACGCGCGATGAAGGCCGCA   |
| query    | ATGTAAAAACCGAAGCGCGAATCATCGATCTACTGCGGGAACGCGCGATGAAGGCCGCA   |
| template | CGATGCTGGTCTCAACGCATAATCTCGGCTCCGTACCCGAGTTTTGCGACTATACGGTAA  |
| query    | CGATGCTGGTCTCAACGCATAATCTCGGCTCCGTACCCGAGTTTTGCGACTATACGGTAA  |
| template | TGATTAAAGGAACCGTACTGGCCAGCGGCCCTACCGAAACACGTTTACCGCCGCGAATC   |
| query    | TGATTAAAGGAACCGTACTGGCCAGCGGCCCTACCGAAACACGTTTACCGCCGCGAATC   |
| template | TGGAACAGGCGTTTAGCGGCGTTCTACGTCAATCGCGTTAAGCGGAGGTGAAGAGCACA   |
| query    | TGGAACAGGCGTTTAGCGGCGTTCTACGTCAATCGCGTTAAGCGGAGGTGAAGAGCACA   |
| template | TCATCACCGATGACGAGCGCCCTTTATTTCCGCGCGGTGGCCAGCGAGGAAAAATCGT    |
| query    | TCATCACCGATGACGAGCGCCCTTTATTTCCGCGCGGTGGCCAGCGAGGAAAAATCGT    |
| template | CATGAACTGGCTTGTTGAGCCGTTTGGCTACCACTATATGCTCAACGCGATGTGGGTCTC  |
| query    | CATGAACTGGCTTGTTGAGCCGTTTGGCTACCACTATATGCTCAACGCGATGTGGGTCTC  |
| template | CGCGATGGTGGGCGGTCTGTGCGCGTTTCTCTCCTGCTATTTGATGCTCAAAGGCTGGTC  |
| query    | CGCGATGGTGGGCGGTCTGTGCGCGTTTCTCTCCTGCTATTTGATGCTCAAAGGCTGGTC  |
| template | GCTCATTGGCGATGCGCTATCTCACTCTATTGTGCTGGCGTCGCTGGCGCCTGGATGTT   |
| query    | GCTCATTGGCGATGCGCTATCTCACTCTATTGTGCTGGCGTCGCTGGCGCCTGGATGTT   |
| template | AGGGCTGCCCTTCTCGCTCGGCGCGTTTCTTTCCGGCGGACTGGCGGCAGGCAGTATGCT  |
| query    | AGGGCTGCCCTTCTCGCTCGGCGCGTTTCTTTCCGGCGGACTGGCGGCAGGCAGTATGCT  |
| template | CTTTCTTAACCAACGCTCACGCCTGAAAGAAGACGCGATTATCGGGCTTATCTTCTCCTC  |
| query    | CTTTCTTAACCAACGCTCACGCCTGAAAGAAGACGCGATTATCGGGCTTATCTTCTCCTC  |
| template | TTTTTTTGGCGTCGGCCTTTTTATGGTGTGCGCTCAATCCGATGTCGGTGAATATCCAGAC |
| query    | TTTTTTTGGCGTCGGCCTTTTTATGGTGTGCGCTCAATCCGATGTCGGTGAATATCCAGAC |
| template | GATTATTCTCGGCAACGTGCTGGCGATCGCACCAGCGGATATTGCGCAACTGGCGATTAT  |
| query    | GATTATTCTCGGCAACGTGCTGGCGATCGCACCAGCGGATATTGCGCAACTGGCGATTAT  |
| template | CGGCGCAGTCTCGCTGACGATTCTGCTGTTAAAGTGGAAGATCTGATGGTCGCTTTTT    |
| query    | CGGCGCAGTCTCGCTGACGATTCTGCTGTTAAAGTGGAAGATCTGATGGTCGCTTTTT    |
| template | CGATGAAACCCATGCGCGTTCTATCGGGCTTAATCCGGGTCGACTAAAGCTGTTGTTTT   |
| query    | CGATGAAACCCATGCGCGTTCTATCGGGCTTAATCCGGGTCGACTAAAGCTGTTGTTTT   |
| template | CACTCTATTGTCCGTCTCTACCGTGGCGGCCCTGCAAACCGTTGGGGCGTTCTCGGTGAT  |
| query    | CACTCTATTGTCCGTCTCTACCGTGGCGGCCCTGCAAACCGTTGGGGCGTTCTCGGTGAT  |
| template | CTGTCTCGTCTGACGCCGGGCGCGACGGCCTGGTTACTCACCGACCGTTTTCCACGTCT   |
| query    | CTGTCTCGTCTGACGCCGGGCGCGACGGCCTGGTTACTCACCGACCGTTTTCCACGTCT   |
| template | GCTCATGATTGCCGTCTGATTGGCAGCCTGACCAGTTTTCTGGGCGCATGGCTTAGCTA   |
| query    | GCTCATGATTGCCGTCTGATTGGCAGCCTGACCAGTTTTCTGGGCGCATGGCTTAGCTA   |
| template | CTGGCTGGATGGCGCCACGGGTGGAATTATTGTCGTATGCAAACCTTACTGTTTCATCAC  |
| query    | CTGGCTGGATGGCGCCACGGGTGGAATTATTGTCGTATGCAAACCTTACTGTTTCATCAC  |
| template | AGCCTTTATTTTCGCCCCGAAACACGGTCTGTTAGCCAACCGTCGACGCGCCCGCTGCA   |
| query    | AGCCTTTATTTTCGCCCCGAAACACGGTCTGTTAGCCAACCGTCGACGCGCCCGCTGCA   |

|          |                                                               |
|----------|---------------------------------------------------------------|
| template | GAAGGAGCCGACATGTTCTTAACAACGTTACTGGAACCTTTTCAGTTTGATTTTATGGTG  |
| query    | GAAGGAGCCGACATGTTCTTAACAACGTTACTGGAACCTTTTCAGTTTGATTTTATGGTG  |
|          |                                                               |
| template | AACGCCCTTATGTTTCGGTCATTGTGGCGATTCCCTGCGCCTTACTGTCCGTGTTTTTA   |
| query    | AACGCCCTTATGTTTCGGTCATTGTGGCGATTCCCTGCGCCTTACTGTCCGTGTTTTTA   |
|          |                                                               |
| template | GTGTTAAAAGGCTGGGCGTTAATGGGCGATGCAATGAGTCATGCGGTATTCGCCGGGTC   |
| query    | GTGTTAAAAGGCTGGGCGTTAATGGGCGATGCAATGAGTCATGCGGTATTCGCCGGGTC   |
|          |                                                               |
| template | GTGCTGGCATATATTGTGGGGATCCCCTGCGGATTGGCGCTTTCATTGCCGGATTATT    |
| query    | GTGCTGGCATATATTGTGGGGATCCCCTGCGGATTGGCGCTTTCATTGCCGGATTATT    |
|          |                                                               |
| template | TGCGCTATCGCCACCGGCTATCTGGACGATAACAGCCGCATCAAACGTGATACGGTGATG  |
| query    | TGCGCTATCGCCACCGGCTATCTGGACGATAACAGCCGCATCAAACGTGATACGGTGATG  |
|          |                                                               |
| template | GGCATCGTCTTTTCCGGGATGTTTGGCGCAGGTCTGGTGCTCTATGTTTCTATTCAATCG  |
| query    | GGCATCGTCTTTTCCGGGATGTTTGGCGCAGGTCTGGTGCTCTATGTTTCTATTCAATCG  |
|          |                                                               |
| template | GAAGTGCATCTGGATCACATCCTGTTTGGGGATATGCTGGGCGTATCGCTGGGGGATATC  |
| query    | GAAGTGCATCTGGATCACATCCTGTTTGGGGATATGCTGGGCGTATCGCTGGGGGATATC  |
|          |                                                               |
| template | GTACAAACGTCAAGTATTGCACTGGGTATTGCGTTAATCATAGGGCTGAAATGAAAAGAT  |
| query    | GTACAAACGTCAAGTATTGCACTGGGTATTGCGTTAATCATAGGGCTGAAATGAAAAGAT  |
|          |                                                               |
| template | CTCCTGCTACACGCTTTTGACCCGCACCAAGGCGAAAGCCAGCGGGCTGAATACCACACTA |
| query    | CTCCTGCTACACGCTTTTGACCCGCACCAAGGCGAAAGCCAGCGGGCTGAATACCACACTA |
|          |                                                               |
| template | CTGCATTATGGCCTGCTATGTATGATTGCGCTGACTATCGTCGCCACGCTGAAATCGGTG  |
| query    | CTGCATTATGGCCTGCTATGTATGATTGCGCTGACTATCGTCGCCACGCTGAAATCGGTG  |
|          |                                                               |
| template | GGCATTATTCTGTCAATCTCACTGCTTATCGCCCCGGCGCAATTGCCATTTTGCTGACG   |
| query    | GGCATTATTCTGTCAATCTCACTGCTTATCGCCCCGGCGCAATTGCCATTTTGCTGACG   |
|          |                                                               |
| template | CGACGCTTTGCGCGCGCGCTGGGATTAGCGGTGAGTCTGTCAATTATTACCGCTTTTGCG  |
| query    | CGACGCTTTGCGCGCGCGCTGGGATTAGCGGTGAGTCTGTCAATTATTACCGCTTTTGCG  |
|          |                                                               |
| template | GGCGTTTATCTGTCTTTTTATCTTGATAGCGCGCCAGCGCCACCATCGTGGTATTATT    |
| query    | GGCGTTTATCTGTCTTTTTATCTTGATAGCGCGCCAGCGCCACCATCGTGGTATTATT    |
|          |                                                               |
| template | GCCATCGTGTTTATTGCGGCATTTATTTACGCAACATGGCGCGACAGGCGTAATGAAATC  |
| query    | GCCATCGTGTTTATTGCGGCATTTATTTACGCAACATGGCGCGACAGGCGTAATGAAATC  |
|          |                                                               |
| template | GTACCAGAGGCGCAAGGTTAACACTTTTTTGCTGCTATTAGGAAACATACGGTCATAA    |
| query    | GTACCAGAGGCGCAAGGTTAACACTTTTTTGCTGCTATTAGGAAACATACGGTCATAA    |
|          |                                                               |
| template | TATAGAGTAGTCTTATGGCGCTGGAAGGATTTCTCTGGCAGGCAACCTTATAATTTTAT   |
| query    | TATAGAGTAGTCTTATGGCGCTGGAAGGATTTCTCTGGCAGGCAACCTTATAATTTTAT   |
|          |                                                               |
| template | TACGGTTTAAAGTAAAGACTTATATTCAGCTATCCTTTTTTATGAGCGGATATAGAGAGT  |
| query    | TACGGTTTAAAGTAAAGACTTATATTCAGCTATCCTTTTTTATGAGCGGATATAGAGAGT  |
|          |                                                               |
| template | TTTTTATCGTTTAGCATAACGGCATTGTTATCGAATCGCTCATAAAGCGTTTCATTCTTT  |
| query    | TTTTTATCGTTTAGCATAACGGCATTGTTATCGAATCGCTCATAAAGCGTTTCATTCTTT  |
|          |                                                               |
| template | TTGTTTACTATACTGCTTCCCGCCGCCGGATTGGCTCCA                       |
| query    | TTGTTTACTATACTGCTTCCCGCCGCCGGATTGGCTCCA                       |

***CS54\_island\_AF140550***

|          |                                                              |
|----------|--------------------------------------------------------------|
| template | TGGCCCGTCAGCAAACCGCGCTGGAACGTCTACGCCAACGGATGGGATTTGCGCTTGAGG |
| query    | TGGCCCGTCAGCAAACCGCGCTGGAACGTCTACGCCAACGGATGGGATTTGCGCTTGAGG |
|          |                                                              |
| template | CCAGGATTAAGCAGGCCAATCAACGCCAACAGTGCGTAAGTCAACGCCTGAGCCAGCAA  |
| query    | CCAGGATTAAGCAGGCCAATCAACGCCAACAGTGCGTAAGTCAACGCCTGAGCCAGCAA  |
|          |                                                              |
| template | ATCCGCAGCCGCGCATTACCGCGCGCAGTCGCGCATCCAACAGCTTGAATATCGTCTGA  |
| query    | ATCCGCAGCCGCGCATTACCGCGCGCAGTCGCGCATCCAACAGCTTGAATATCGTCTGA  |

|          |                                                                |
|----------|----------------------------------------------------------------|
| template | CGGAGAATATCCGCTCACGGTTAAGCGAACAGCGCGAGCGTTTTGGCAACGCGGTCACGC   |
| query    | CGGAGAATATCCGCTCACGGTTAAGCGAACAGCGCGAGCGTTTTGGCAACGCGGTCACGC   |
| template | ATCTGGAAGCGGTACGCCCCTAGCCACGCTGGCGCGCGGTATACGGTTTCGACGACAA     |
| query    | ATCTGGAAGCGGTACGCCCCTAGCCACGCTGGCGCGCGGTATACGGTTTCGACGACAA     |
| template | CGGACGGCAAGGTGCTGAAAAAGATCAAACAGGTCAAAGCAGGCGATATCATGACCACGA   |
| query    | CGGACGGCAAGGTGCTGAAAAAGATCAAACAGGTCAAAGCAGGCGATATCATGACCACGA   |
| template | GACTGGAGGACGGCTGGCTTGAAAGTGAAGTCAAATCCGTACGCCGGGACGTAAATCCA    |
| query    | GACTGGAGGACGGCTGGCTTGAAAGTGAAGTCAAATCCGTACGCCGGGACGTAAATCCA    |
| template | ACACTCCCCACCCCTTTGCAGCGCATGTTGGGTTTCGACTTCGCCTCAGCCAACCTACG    |
| query    | ACACTCCCCACCCCTTTGCAGCGCATGTTGGGTTTCGACTTCGCCTCAGCCAACCTACG    |
| template | CGCCACGTCGGATAAGGTGTAGCCATAATCTGACGATCAACCGTTTGTATTGCCTCA      |
| query    | CGCCACGTCGGATAAGGTGTAGCCATAATCTGACGATCAACCGTTTGTATTGCCTCA      |
| template | AAACCGGGCAGGGAACACCCGCCCGGTTTTGTCTAACTTACCAGTTATAGCGCAGATTGA   |
| query    | AAACCGGGCAGGGAACACCCGCCCGGTTTTGTCTAACTTACCAGTTATAGCGCAGATTGA   |
| template | GGCTACCGTTTACGATCGCCAAAGTCATTGCTGCCAGTCTGCCGGCAACCTGAGCGCGAA   |
| query    | GGCTACCGTTTACGATCGCCAAAGTCATTGCTGCCAGTCTGCCGGCAACCTGAGCGCGAA   |
| template | CGCTCCACTGCTTATCGATATCTGCCTGCAGACCCACTTTCAGCTCCGCACGGTTAGCCG   |
| query    | CGCTCCACTGCTTATCGATATCTGCCTGCAGACCCACTTTCAGCTCCGCACGGTTAGCCG   |
| template | GAAGATCCTGTTTACCGTAGCATCATCAAACGATACCGACACATCATCGCTGGTGTGCA    |
| query    | GAAGATCCTGTTTACCGTAGCATCATCAAACGATACCGACACATCATCGCTGGTGTGCA    |
| template | GCCAGTTAGCTTCAGCAAACGGCTGGATAAACGTACGGCTGCCTTTGTACAGCTTGCCGT   |
| query    | GCCAGTTAGCTTCAGCAAACGGCTGGATAAACGTACGGCTGCCTTTGTACAGCTTGCCGT   |
| template | CAACACGCAGACCCAGACGCGTTGTCCAACGTGCGCCATCCTGACCATCGATCCGGGTGC   |
| query    | CAACACGCAGACCCAGACGCGTTGTCCAACGTGCGCCATCCTGACCATCGATCCGGGTGC   |
| template | CGTAGTTATCCTTACGCTATCCGCTGAGTAATTCTGCCAGACAACCTGCGCCTGCGGCG    |
| query    | CGTAGTTATCCTTACGCTATCCGCTGAGTAATTCTGCCAGACAACCTGCGCCTGCGGCG    |
| template | TCAGACTGACAGTATTACCGTTGCTAAGCGCAATATCGTAGCGATAACCAAGTTTCCAGCG  |
| query    | TCAGACTGACAGTATTACCGTTGCTAAGCGCAATATCGTAGCGATAACCAAGTTTCCAGCG  |
| template | AGACGGCGTTAGCGGTTGAATCATAAGATTAGATCCCGCATCACCGCTCTCTACGCTGT    |
| query    | AGACGGCGTTAGCGGTTGAATCATAAGATTAGATCCCGCATCACCGCTCTCTACGCTGT    |
| template | TGTTGTAGAAACCATATTGGTACCAGCTGTCGACATACGCGCCGCTATGCGTTTGGGCAT   |
| query    | TGTTGTAGAAACCATATTGGTACCAGCTGTCGACATACGCGCCGCTATGCGTTTGGGCAT   |
| template | CGGCAAACCAAGGTGGCATAGACGCCAAGGTTGTAGCCGCTCTACGTTGCCGCTACTGGTGA |
| query    | CGGCAAACCAAGGTGGCATAGACGCCAAGGTTGTAGCCGCTCTACGTTGCCGCTACTGGTGA |
| template | ACTGGCTACCGTCTGCGCCACGGTTACCGGTGCTGTGCGTATCGGCGTTGATGTAGCTCG   |
| query    | ACTGGCTACCGTCTGCGCCACGGTTACCGGTGCTGTGCGTATCGGCGTTGATGTAGCTCG   |
| template | CCATGACGCCAACGGTAACGCTCTGCTGGCCGTTACCCAGGCCAGAATGTCGCCGCCTA    |
| query    | CCATGACGCCAACGGTAACGCTCTGCTGGCCGTTACCCAGGCCAGAATGTCGCCGCCTA    |
| template | ACTGGAAGTGGGAGTAGTTGCTGTCCATATCGATATTGCCGCTGACAGCCTCGGATTCCG   |
| query    | ACTGGAAGTGGGAGTAGTTGCTGTCCATATCGATATTGCCGCTGACAGCCTCGGATTCCG   |
| template | CTTTACCCGCTTTGAAGCGCGCCATACGCTGCCATCGGCATTACGATACTGGCTGCCCT    |
| query    | CTTTACCCGCTTTGAAGCGCGCCATACGCTGCCATCGGCATTACGATACTGGCTGCCCT    |
| template | CGCGGTCATAGAGGGTCTGCATTTGCAGGTTGCGCGCCATCCACTGGTTGCCATGTACG    |
| query    | CGCGGTCATAGAGGGTCTGCATTTGCAGGTTGCGCGCCATCCACTGGTTGCCATGTACG    |
| template | CGCCGATATCCGCACGGTACTGCGGTGCGACATCGCCGCCGTGGTCCGGAGGCGTGACAT   |
| query    | CGCCGATATCCGCACGGTACTGCGGTGCGACATCGCCGCCGTGGTCCGGAGGCGTGACAT   |

|          |                                                                |
|----------|----------------------------------------------------------------|
| template | CGCCGCCGTCGCCGCCGTCGTCGGAGGCGTGACATTACCGCCATCGCCGCCGTCGTCGG    |
| query    |                                                                |
| template | GAGGCGTGACATTACCGCCATCGTCACCGCCATCCGAAGGCGTGTATCACCGCCGCTGT    |
| query    | GAGGCGTGACATTACCGCCATCGTCACCGCCATCCGAAGGCGTGTATCACCGCCGCTGT    |
| template | CGTCATCATCAGACTGTGCTTTTGACGCCAGATACCAGTCGTTGTCACTTTTCATTCCAGT  |
| query    | CGTCATCATCAGACTGTGCTTTTGACGCCAGATACCAGTCGTTGTCACTTTTCATTCCAGT  |
| template | ACAGACGGTAGGTATACAGACCGGCGTTAACCTCATTTTTTAGCTCAAACGCATCGCTGG   |
| query    | ACAGACGGTAGGTATACAGACCGGCGTTAACCTCATTTTTTAGCTCAAACGCATCGCTGG   |
| template | TCGATACGCCGCCAACATCCACCACTTCGATACCGTTAGTGGTCTGTGCTCCATCGCCGA   |
| query    | TCGATACGCCGCCAACATCCACCACTTCGATACCGTTAGTGGTCTGTGCTCCATCGCCGA   |
| template | TGCCGTTGATGTACAGATCGGTGGTGCCGGAAGCATCGCCGGTAATGACCAACTTATCGG   |
| query    | TGCCGTTGATGTACAGATCGGTGGTGCCGGAAGCATCGCCGGTAATGACCAACTTATCGG   |
| template | TTGCCGAATCATCGTCGCCCAGGACGGTATTCAAGTAAGCGAGCCGCCGTTGCCGGTGT    |
| query    | TTGCCGAATCATCGTCGCCCAGGACGGTATTCAAGTAAGCGAGCCGCCGTTGCCGGTGT    |
| template | AATTGCCATCGACATAAAGCGTATTGCCAGGCGTGCTGGAGCTGCTACCACTGGTCATTG   |
| query    | AATTGCCATCGACATAAAGCGTATTGCCAGGCGTGCTGGAGCTGCTACCACTGGTCATTG   |
| template | TCCCCATGTTGATCAGATCGCCATTGAAGGTGAAGATAGCGCCTGTTTCTCGTGTTGC     |
| query    | TCCCCATGTTGATCAGATCGCCATTGAAGGTGAAGATAGCGCCTGTTTCTCGTGTTGC     |
| template | CGAAGACCAGCGTCCCTTCGTTGGTCACCTTACCGTTAACGGTCGTACCATTGCTGCCGC   |
| query    | CGAAGACCAGCGTCCCTTCGTTGGTCACCTTACCGTTAACGGTCGTACCATTGCTGCCGC   |
| template | CGAAGGTCGCCCCGGAGGCGACGTTACCGCCTGCTGGCTGCCATCTCGCCAATCGAGC     |
| query    | CGAAGGTCGCCCCGGAGGCGACGTTACCGCCTGCTGGCTGCCATCTCGCCAATCGAGC     |
| template | CGTCTCCGGACAGCCATAGCGTGCCTTCTGTACGTTGGTATCGCCGCTATAAGTGTTCG    |
| query    | CGTCTCCGGACAGCCATAGCGTGCCTTCTGTACGTTGGTATCGCCGCTATAAGTGTTCG    |
| template | CGCCGCTCAGCGTCAGTTTACCCGCGCCAGTTTGGTCAGCGATTACCGTCCCAGTCGC     |
| query    | CGCCGCTCAGCGTCAGTTTACCCGCGCCAGTTTGGTCAGCGATTACCGTCCCAGTCGC     |
| template | CGTTGCCGGTTTTATCGCCCAGTACGCTGGTGACTTCAAAACTGTCGCCTGCGCCCAGGG   |
| query    | CGTTGCCGGTTTTATCGCCCAGTACGCTGGTGACTTCAAAACTGTCGCCTGCGCCCAGGG   |
| template | TAAACGTGCCGTGTCTGGCGTCGCTGACGTGGCGGTCGCATTCCAGCTCAGCCCTTCGG    |
| query    | TAAACGTGCCGTGTCTGGCGTCGCTGACGTGGCGGTCGCATTCCAGCTCAGCCCTTCGG    |
| template | TAAGCAGATATTCTGACGCATCTTCAGGATTGATTGTCCCGTTACGGTCAGATAGTCCG    |
| query    | TAAGCAGATATTCTGACGCATCTTCAGGATTGATTGTCCCGTTACGGTCAGATAGTCCG    |
| template | GCTTGTCAGTGAGGTTTCATCGTCAGGCTGGTAAAGTCGCCGCTGATATCGCTGGTCATAT  |
| query    | GCTTGTCAGTGAGGTTTCATCGTCAGGCTGGTAAAGTCGCCGCTGATATCGCTGGTCATAT  |
| template | CCATCAGTTTAAAGGACTGGAAC TCCGCGTCGGAGGCGCGCCTTG CAGGCTGGCGTCGC  |
| query    | CCATCAGTTTAAAGGACTGGAAC TCCGCGTCGGAGGCGCGCCTTG CAGGCTGGCGTCGC  |
| template | TGACGACCAAATCGCCGCCAAGCGTGGCGCTGCTGCCGGTAATCAGCGTTGCACTGAGT    |
| query    | TGACGACCAAATCGCCGCCAAGCGTGGCGCTGCTGCCGGTAATCAGCGTTGCACTGAGT    |
| template | CAC TATTCAGCTCAACGTT CAGCGTACTGCCATCTTGCTGAATTAACGCGCTGTCGCCGA |
| query    | CAC TATTCAGCTCAACGTT CAGCGTACTGCCATCTTGCTGAATTAACGCGCTGTCGCCGA |
| template | GATCCAACGAGGTGCCGAGCGCCAGTTGGGTCGTCGCGCCGCTATGAGTGGTGATGCCGC   |
| query    | GATCCAACGAGGTGCCGAGCGCCAGTTGGGTCGTCGCGCCGCTATGAGTGGTGATGCCGC   |
| template | CCACCGCGCTGACTTCAACGCTGCGTCCAGCACCAGCGTGGCATTATTGTCTACCAGAC    |
| query    | CCACCGCGCTGACTTCAACGCTGCGTCCAGCACCAGCGTGGCATTATTGTCTACCAGAC    |
| template | CGGTGCCCAGCGCCGTCGTACTGGCGGCGACCAGCGTACCTTCATTGATGGTGGTGCCGC   |
| query    | CGGTGCCCAGCGCCGTCGTACTGGCGGCGACCAGCGTACCTTCATTGATGGTGGTGCCGC   |
| template | CGCTGTAGTCGTTGTGCGCCAGAGAGGATCAGCGTGCCTGCGCCTTCTTTGGTCAGCGATT  |

|          |                                                                |
|----------|----------------------------------------------------------------|
| query    | CGCTGTAGTCGTTGTCCGCAGAGAGGATCAGCGTGCCTTCTTTGGTCAGCGATT         |
| template | TACCGTCCCATCTGCTACCCGGATCCAGCGTATCGTCAACGCTCTGTCAAGTGTAGCCGCAA |
| query    | TACCGTCCCATCTGCTACCCGGATCCAGCGTATCGTCAACGCTCTGTCAAGTGTAGCCGCAA |
| template | CGTTAAAGCTGCCGTCAGGGTCGCTCAGGGTAAAGGTGCCGTGGGCGTCGGTAGTGGCGT   |
| query    | CGTTAAAGCTGCCGTCAGGGTCGCTCAGGGTAAAGGTGCCGTGGGCGTCGGTAGTGGCGT   |
| template | TGTCTCTGTCCGCATACCAGGAGAGGGAGGCCGTAGATCATAGTGGGTGTTGTCTGCTT    |
| query    | TGTCTCTGTCCGCATACCAGGAGAGGGAGGCCGTAGATCATAGTGGGTGTTGTCTGCTT    |
| template | CATCGACTTTTCCGTCGATAGTCAGGAAGTCAACATCTTCTCTATTTCCTCCGCGACGG    |
| query    | CATCGACTTTTCCGTCGATAGTCAGGAAGTCAACATCTTCTCTATTTCCTCCGCGACGG    |
| template | TCAGATCGTCGAAATCGGTCGTAATGGCGCTGTCGCTGCCAATCAGCGTGTAAGTGTATG   |
| query    | TCAGATCGTCGAAATCGGTCGTAATGGCGCTGTCGCTGCCAATCAGCGTGTAAGTGTATG   |
| template | CCTCAGGCGTCCAGCTGTCTGTAACGCTGCCAATGCCGGTAACATTAGCGTGCCGCCCA    |
| query    | CCTCAGGCGTCCAGCTGTCTGTAACGCTGCCAATGCCGGTAACATTAGCGTGCCGCCCA    |
| template | GCGCGACGCTGTCGGCGGTAATCACGGCGTCGTCGGTGGCCGCGCCGAGGTCAATACTTA   |
| query    | GCGCGACGCTGTCGGCGGTAATCACGGCGTCGTCGGTGGCCGCGCCGAGGTCAATACTTA   |
| template | GCGTACTGCCGCTTCTGGGTGAAC TGCCCGCGTCAAGGGTGCTGCCGCTGCCAGCG      |
| query    | GCGTACTGCCGCTTCTGGGTGAAC TGCCCGCGTCAAGGGTGCTGCCGCTGCCAGCG      |
| template | CGGTAGTGGCGCCGCTATGGGTGGTGACGTTTCGCAAGCTCAAATGCGCCGTTGGCATCCA  |
| query    | CGGTAGTGGCGCCGCTATGGGTGGTGACGTTTCGCAAGCTCAAATGCGCCGTTGGCATCCA  |
| template | GTATCAGCGTACCGCTGTTGTGCGATATTGCCGCTGCCAGCGCGTTGACGTTGGCGGCAA   |
| query    | GTATCAGCGTACCGCTGTTGTGCGATATTGCCGCTGCCAGCGCGTTGACGTTGGCGGCAA   |
| template | TCAGCGTGCCGTCAGTGATAGTGGTGCCGCCGGAATAGCTGTTGTCGCCGCCTAACGTCA   |
| query    | TCAGCGTGCCGTCAGTGATAGTGGTGCCGCCGGAATAGCTGTTGTCGCCGCCTAACGTCA   |
| template | GCTCGCCGGTACCGGTTTTGACCAGCGAACCCTGCCGGAAGCGTATTTTCCAGCTCGC     |
| query    | GCTCGCCGGTACCGGTTTTGACCAGCGAACCCTGCCGGAAGCGTATTTTCCAGCTCGC     |
| template | CCTCACCGACCTGAAGCACACCGCTGTTGGCAACAGCTCCGGTACCCAGCGAATCCGCAT   |
| query    | CCTCACCGACCTGAAGCACACCGCTGTTGGCAACAGCTCCGGTACCCAGCGAATCCGCAT   |
| template | GGTCAGCCGTCAGCGTACCGCCGATAATGGTGGTGCCGCCGAGTAACGTATCGCCGC      |
| query    | GGTCAGCCGTCAGCGTACCGCCGATAATGGTGGTGCCGCCGAGTAACGTATCGCCGC      |
| template | TTAACGTCAGTTCGCCCGTACCGGTTTTGACCAGCGAACCCTGCCGGAAGCGTATTTT     |
| query    | TTAACGTCAGTTCGCCCGTACCGGTTTTGACCAGCGAACCCTGCCGGAAGCGTATTTT     |
| template | CCAGCTCGCCCTCGCCGACCTGAAGCACACCGCTGTTGGCAACAGCTCCGGTACCCAGCG   |
| query    | CCAGCTCGCCCTCGCCGACCTGAAGCACACCGCTGTTGGCAACAGCTCCGGTACCCAGCG   |
| template | AATCCGCATGGTCAGCCGTACCGCCGATAATGGTGGTGCCGCCGGAGTAACGTGT        |
| query    | AATCCGCATGGTCAGCCGTACCGCCGATAATGGTGGTGCCGCCGGAGTAACGTGT        |
| template | TATCGCCGCTTAACGTCAGTTGCCCCGTACCGGTTTTGACCAGCGAACCCTGCCGGAAA    |
| query    | TATCGCCGCTTAACGTCAGTTGCCCCGTACCGGTTTTGACCAGCGAACCCTGCCGGAAA    |
| template | GCGTATTTTCCAGCTCGCCCTCGCCGACCTGAAGCACGCCGCTGTTGGCAACAGCTCCGG   |
| query    | GCGTATTTTCCAGCTCGCCCTCGCCGACCTGAAGCACGCCGCTGTTGGCAACAGCTCCGG   |
| template | TACCCAGCGAATCCGCATGGTCAGCCGTACCGCCGATAATGGTGGTGCCGCCGG         |
| query    | TACCCAGCGAATCCGCATGGTCAGCCGTACCGCCGATAATGGTGGTGCCGCCGG         |
| template | AGTAATCGTTGCCGCCGCTTAACGTCAGCTCGCCGGTACCGGTTTTACCCAGCGAACC GC  |
| query    | AGTAATCGTTGCCGCCGCTTAACGTCAGCTCGCCGGTACCGGTTTTACCCAGCGAACC GC  |
| template | TGCCGGAAGCGTATTTTCCAGATCGCCTTCGCCCACTTAAGCACGCCGCTGTTATCGA     |
| query    | TGCCGGAAGCGTATTTTCCAGATCGCCTTCGCCCACTTAAGCACGCCGCTGTTATCGA     |
| template | TATCGCCGCTGCCAGCGAATCCGCATGGTCAGCCGTACCGCCGTAATGGTGG           |
| query    | TATCGCCGCTGCCAGCGAATCCGCATGGTCAGCCGTACCGCCGTAATGGTGG           |



|          |                                                               |
|----------|---------------------------------------------------------------|
| template | TGCCGCCGGAGTAAGTGTGTGTCGCCGCTTAGCGTCAGTTCGCTGTGCCGGTTTTTCACCA |
| query    | TGCCGCCGGAGTAAGTGTGTGTCGCCGCTTAGCGTCAGTTCGCTGTGCCGGTTTTTCACCA |
| template | GCGAGCCGCTGCCGAAAGGATGTTTTCCAGCTCGCCTTCGCCACCTTAAGCACGCCGC    |
| query    | GCGAGCCGCTGCCGAAAGGATGTTTTCCAGCTCGCCTTCGCCACCTTAAGCACGCCGC    |
| template | TGTTGTCGATATCGCCGCTGCCAGCGAATCCGCATGGTCAGCCGTACGCGTACCGCCGG   |
| query    | TGTTGTCGATATCGCCGCTGCCAGCGAATCCGCATGGTCAGCCGTACGCGTACCGCCGG   |
| template | AAATAGTGGTGCCGCGCTGTAGTTGTTATCGCCGGTCACGATCAGCTCATCGCTACCGC   |
| query    | AAATAGTGGTGCCGCGCTGTAGTTGTTATCGCCGGTCACGATCAGCTCATCGCTACCGC   |
| template | TTTTGACAATTTGGCCCTCGCCGGTCACGTTGTTATCCAGCGTGCCCTGGCTCAGCGCAA  |
| query    | TTTTGACAATTTGGCCCTCGCCGGTCACGTTGTTATCCAGCGTGCCCTGGCTCAGCGCAA  |
| template | GCGTTGCGCTTCTGCAATCGTCACATCGCCAGTGCCGAGCGCGCGGCGTCTTTGGCGG    |
| query    | GCGTTGCGCTTCTGCAATCGTCACATCGCCAGTGCCGAGCGCGCGGCGTCTTTGGCGG    |
| template | CCAGAATGCCGCCGTCAATTTTCAGTATCGCCGTAGTCGTTGCCGGTGTGCTGAGGATCA  |
| query    | CCAGAATGCCGCCGTCAATTTTCAGTATCGCCGTAGTCGTTGCCGGTGTGCTGAGGATCA  |
| template | GCGTGCCGTGCGCTTGTTGGTTAGCTTGCTGCCGTTCCAGTTGGAGGTCGCCGTGGTTT   |
| query    | GCGTGCCGTGCGCTTGTTGGTTAGCTTGCTGCCGTTCCAGTTGGAGGTCGCCGTGGTTT   |
| template | CGTCCAGTTCGCTGGTGACGGTAAAGGTACTGCCTGCATCAACGGTAAAAGTGCCATGCG  |
| query    | CGTCCAGTTCGCTGGTGACGGTAAAGGTACTGCCTGCATCAACGGTAAAAGTGCCATGCG  |
| template | CAGCGCGCGCAGAATTTGCGCCCGCGTACCAACTCAAGCCCGTAGACAACTCGTAGTTGG  |
| query    | CAGCGCGCGCAGAATTTGCGCCCGCGTACCAACTCAAGCCCGTAGACAACTCGTAGTTGG  |
| template | TATTATCATTGCGATCAACGCCCGCGTTGATCGTCAGATAATCCGGCATAGCGGAGGTGT  |
| query    | TATTATCATTGCGATCAACGCCCGCGTTGATCGTCAGATAATCCGGCATAGCGGAGGTGT  |
| template | CAGCATCCAGTGTTACGCTGTCAAAATCGGTAGTGATTGCAGTTTGCGAATCAATCAGCG  |
| query    | CAGCATCCAGTGTTACGCTGTCAAAATCGGTAGTGATTGCAGTTTGCGAATCAATCAGCG  |
| template | TGATCGATCCAAAGTGTTGTCGGTTTCGGGCGCGACAAAGGTGGCCGTTGAGCTAAGGT   |
| query    | TGATCGATCCAAAGTGTTGTCGGTTTCGGGCGCGACAAAGGTGGCCGTTGAGCTAAGGT   |
| template | TCAGCGTCCCGTCCAGCGTGACGTTGGCGGCTTTGATAATTGGCGCGCTGTTGGCGGTAT  |
| query    | TCAGCGTCCCGTCCAGCGTGACGTTGGCGGCTTTGATAATTGGCGCGCTGTTGGCGGTAT  |
| template | CCAGCGTCGCGTTTATCTGGCTGCCGTCTGCAAGGTCAGGGTATTGTCCACCGTCAGCA   |
| query    | CCAGCGTCGCGTTTATCTGGCTGCCGTCTGCAAGGTCAGGGTATTGTCCACCGTCAGCA   |
| template | GCGTACCTGTGCAACCGCTCGCGTTGCCAGCGTAATATCGCCGTCGTTGGTCAGATTGC   |
| query    | GCGTACCTGTGCAACCGCTCGCGTTGCCAGCGTAATATCGCCGTCGTTGGTCAGATTGC   |
| template | CGACGGTTGACGGGTCGGTCATGTTCCACTGGCTGGTGTGTCGAGCGACAGCGTAGTAA   |
| query    | CGACGGTTGACGGGTCGGTCATGTTCCACTGGCTGGTGTGTCGAGCGACAGCGTAGTAA   |
| template | ACATCGCATCTACACTACCGGTTAACGTGGACCCCTGGCTTAAAGAGAGCGATGACGATG  |
| query    | ACATCGCATCTACACTACCGGTTAACGTGGACCCCTGGCTTAAAGAGAGCGATGACGATG  |
| template | ACGCGTCAGTCTGGACAATGTTGCCGGTCAGCATCGTTTTTTCGGCCTGAATAGTCGCTT  |
| query    | ACGCGTCAGTCTGGACAATGTTGCCGGTCAGCATCGTTTTTTCGGCCTGAATAGTCGCTT  |
| template | TGCTGCCTAATTTGATCGCGGTCGGCGCCGTAAGGTGCTGTTGGTGAGCTCAATGGGGT   |
| query    | TGCTGCCTAATTTGATCGCGGTCGGCGCCGTAAGGTGCTGTTGGTGAGCTCAATGGGGT   |
| template | CGTTAATGGTCGTGCTGCCATCAATGTTTCAGTGCGACAGTTTTTGAGGTGACGTTTGCGT |
| query    | CGTTAATGGTCGTGCTGCCATCAATGTTTCAGTGCGACAGTTTTTGAGGTGACGTTTGCGT |
| template | CGCTGACCGTCAGCGGTTGAGATCCTCATAACCGTCGAGTTTTCTTTTGCTGGTTATAA   |
| query    | CGCTGACCGTCAGCGGTTGAGATCCTCATAACCGTCGAGTTTTCTTTTGCTGGTTATAA   |
| template | AGATACCGTCGCCGTCGGCGTTGATGGTGCGCCGTCGATCCTGGCGTCCGACGCCAGAA   |
| query    | AGATACCGTCGCCGTCGGCGTTGATGGTGCGCCGTCGATCCTGGCGTCCGACGCCAGAA   |

|                |                                                                                                                                |
|----------------|--------------------------------------------------------------------------------------------------------------------------------|
| template query | TATACACGCCCGTACCGGCAGAGGTAATGTTGCCGCCTGTAATATCCAGGGTAGTGGCGT<br>TATACACGCCCGTACCGGCAGAGGTAATGTTGCCGCCTGTAATATCCAGGGTAGTGGCGT   |
| template query | TATTGGCCTGTACCGCCGCGCGCTGGCATTGGTATGTGTTATGGTCGCGTTGGTGAGAT<br>TATTGGCCTGTACCGCCGCGCGCTGGCATTGGTATGTGTTATGGTCGCGTTGGTGAGAT     |
| template query | TAAGAGCGGCCTTATTGGTACCCTGGATGGTGCTCATCGTACCTGCAGAGCTGACCGAGC<br>TAAGAGCGGCCTTATTGGTACCCTGGATGGTGCTCATCGTACCTGCAGAGCTGACCGAGC   |
| template query | TATCAGACAGGTTCAGGGTGGAACCTCGTCTGTCGCGGTGTTTCCGGCAACAACGTTTA<br>TATCAGACAGGTTCAGGGTGGAACCTCGTCTGTCGCGGTGTTTCCGGCAACAACGTTTA     |
| template query | TCTGGCCTTGCGCCAGGGTGATTGTGCTACCGTCCAGCACGTTACGCGTACTGCCTTGTT<br>TCTGGCCTTGCGCCAGGGTGATTGTGCTACCGTCCAGCACGTTACGCGTACTGCCTTGTT   |
| template query | GCACCTGCGCGCTGCTGCTGTTAGCTGCCTCAACGATGGTACCGTCCAGCGTTGCTTCTG<br>GCACCTGCGCGCTGCTGCTGTTAGCTGCCTCAACGATGGTACCGTCCAGCGTTGCTTCTG   |
| template query | AACCCGTATACAACGTCATTACGCCGAAATTGCCGTCAATCGTTAGCGTACTGTCTGTTA<br>AACCCGTATACAACGTCATTACGCCGAAATTGCCGTCAATCGTTAGCGTACTGTCTGTTA   |
| template query | ACCTCAGTGTGCTGCCATCCGCTGCGGAAATACCCTGGGTATAAATACCCGTAGTGGTTA<br>ACCTCAGTGTGCTGCCATCCGCTGCGGAAATACCCTGGGTATAAATACCCGTAGTGGTTA   |
| template query | TCTTCGCGTCGGTAAGCTCAAGGATAGCGTAATGATCCAGCGAAATGGCGTTGGAAACAT<br>TCTTCGCGTCGGTAAGCTCAAGGATAGCGTAATGATCCAGCGAAATGGCGTTGGAAACAT   |
| template query | ACTTACCGCCATCCGGATCATCAGCCCCGCCTCCGCTTGTTTCAATGACGAGCCCCGTCC<br>ACTTACCGCCATCCGGATCATCAGCCCCGCCTCCGCTTGTTTCAATGACGAGCCCCGTCC   |
| template query | CTGTGACCGTGGTGGGCTGCCAGCCGACGGTGGCGACACCCGAGACATATAGCGCCGCGC<br>CTGTGACCGTGGTGGGCTGCCAGCCGACGGTGGCGACACCCGAGACATATAGCGCCGCGC   |
| template query | CTTCATCGGTGCCGAATAGCTTATCGGCGGCGTTGACGCATCCAGAACGTGGGGCTGCG<br>CTTCATCGGTGCCGAATAGCTTATCGGCGGCGTTGACGCATCCAGAACGTGGGGCTGCG     |
| template query | CATCAGCATATGATACCTGATTATCGGCCATAGCCAGCGGGCTGAAAAATCCGAGCGCCG<br>CATCAGCATATGATACCTGATTATCGGCCATAGCCAGCGGGCTGAAAAATCCGAGCGCCG   |
| template query | CAGCCACGGCGCAAGCCAGCGCCGCGCGCTTGCTTTTATTATTTGTCCATATTCGACT<br>CAGCCACGGCGCAAGCCAGCGCCGCGCGCTTGCTTTTATTATTTGTCCATATTCGACT       |
| template query | TTTGGTTTGAGATATGGGTTTCACTCGCGCATACTTGCCTTTAACTTTGCTGTGGCCT<br>TTTGGTTTGAGAT-ATGGGTTTCACTCGCGCATACTTGCCTTTAACTTTGCTGTGGCCT      |
| template query | CACGCCAGTTCTGAAGCCACGACATACATATTTGCGACGGCGCTCCAGACAATACTGTAA<br>CACGCCAGTTCTGAAGCCACGACATACATATTTGCGACGGCGCTCCAGACAATACTGTAA   |
| template query | GTCCTGTTCAATTTTTAAATTTCCCTTTAATAACGTTACGAAGCAAACCTGGATTTTGAT<br>GTCCTGTTCAATTTTTAAATTTCCCTTTAATAACGTTACGAAGCAAACCTGGATTTTGAT   |
| template query | TGGGCTGCAAAATAGCCTTTAAATGCTACATTATCAATGAGTTAAATAATAAATAACAAAA<br>TGGGCTGCAAAATAGCCTTTAAATGCTACATTATCAATGAGTTAAATAATAAATAACAAAA |
| template query | ATACAGCTCTATGAATGGTTGCAATCACCTGAAACAATATATTATCCAAGCCAAATTAT<br>ATACAGCTCTATGAATGGTTGCAATCACCTGAAACAATATATTATCCAAG-CCAAATTAT    |
| template query | TAACTAATTTCAAGGCTTATTTCAATGCCAGGTCAATTTCTGGTTGATTATAATTGATA<br>TAACTAATTTCAAGGCTTATTTCAATGCCAGGTCAATTTCTGGTTGATTATAATTGATA     |
| template query | TAAATACATTCATCCATTTAATAAATATTTATATCGTGAATAACATTTAATAACTTCATA<br>TAAATACATTCATCCATTTAATAAATATTTATATCGTGAATAACATTTAATAACTTCATA   |
| template query | TATTGAAATAAATAAATGCGTGAAACAAAAAGGTGTGATTATCATGCGACACCTGGCGTT<br>TATTGAAATAAATAAATGCGTGAAACAAAAAGGTGTGATTATCATGCGACACCTGGCGTT   |
| template query | ATTTTAAATATACTCGTCATACTTCAAGTTGCATGTGCTGCGGCTGCGTTCCCTCACCCC<br>ATTTTAAATATACTCGTCATACTTCAAGTTGCATGTGCTGCGGCTGCGTTCCCTCACCCC   |
| template       | AGTCACTTACTTTAGTAAGCTCCCGGGGATTCGCTCGCTTGCCGCCTTCTTGCAACTCGA                                                                   |

|          |                                                               |
|----------|---------------------------------------------------------------|
| query    | AGTCACCTTACTTTAGTAAGCTCCCGGGATTTCGCTCGCTTGC CGCTTCCGCAACTCGA  |
| template | ATTATTTAGAGTATATACGTAGCGCCAGATGCCGGGTTGCAGAA                  |
| query    | ATTATTTAGAGTATATACGTAGCGCCAGATGCCGGGTTGCAGAA                  |
| template | ACACACGCGTGCGCAACGGTGGTGACGCCAATTAGCAGAACATATACTTTTCAATGAATG  |
| query    | ACACACGCGTGCGCAACGGTGGTGACGCCAATTAGCAGAACATATACTTTTCAATGAATG  |
| template | CTACTTTCACTTTTTCATGAAGCTCAATTGAACGTGAAAAGCAGATTATTTTCGTGCCAG  |
| query    | CTACTTTCACTTTTTCATGAAGCTCAATTGAACGTGAAAAGCAGATTATTTTCGTGCCAG  |
| template | ACGCATAATACGTTACTCCACGCACGTCGCATAACCCGCTGAGCCTGCCGGCTTAATGGC  |
| query    | ACGCATAATACGTTACTCCACGCACGTCGCATAACCCGCTGAGCCTGCCGGCTTAATGGC  |
| template | GCAGTTTTGACTCTTGGTATTCTCATCTACGCCGCAATACATGCCGCCGCTTGAGGTTGA  |
| query    | GCAGTTTTGACTCTTGGTATTCTCATCTACGCCGCAATACATGCCGCCGCTTGAGGTTGA  |
| template | TTTAGATAAATAGGGATAGCCCTGCGTCGGCCAGCCTAACGAGCTAATTGAATGATACAG  |
| query    | TTTAGATAAATAGGGATAGCCCTGCGTCGGCCAGCCTAACGAGCTAATTGAATGATACAG  |
| template | CGTCAACAGGTCGTTATTATCCGGTGCTTGTCTAAGGCTACCGCACTGTTTGGCAATATC  |
| query    | CGTCAACAGGTCGTTATTATCCGGTGCTTGTCTAAGGCTACCGCACTGTTTGGCAATATC  |
| template | CCATTTCTGTGTGTCACCGTATGCGCCATCGCCAGTACTCGTTATTTGCATGCACTCC    |
| query    | CCATTTCTGTGTGTCACCGTATGCGCCATCGCCAGTACTCGTTATTTGCATGCACTCC    |
| template | GTTGGTAAATACTGGCGTTACGCCCTGACAGCATCTCAGCCTGAAGCCACGGACGATGCAG |
| query    | GTTGGTAAATACTGGCGTTACGCCCTGACAGCATCTCAGCCTGAAGCCACGGACGATGCAG |
| template | CGTTTTTCCGTTGACGGATGTCGTATCCGACATATTTCCCCAGAACAACGCTTTATCCGT  |
| query    | CGTTTTTCCGTTGACGGATGTCGTATCCGACATATTTCCCCAGAACAACGCTTTATCCGT  |
| template | ATCCGGGCTGGTAAGTACCATAAAAAATCACATCCAGCGATGCGTGAAGAGTCGTATTGTC |
| query    | ATCCGGGCTGGTAAGTACCATAAAAAATCACATCCAGCGATGCGTGAAGAGTCGTATTGTC |
| template | CGTCACTTTACCGTGAGTGGCGTTTTCAACCCAGGCTTTTATCCTGATTAAAGCGTAAA   |
| query    | CGTCACTTTACCGTGAGTGGCGTTTTCAACCCAGGCTTTTATCCTGATTAAAGCGTAAA   |
| template | CGTTGCCGTACCGTCGCTGCCGGTAGTGCCGGTAAAGACAATCCCGGTGGTGGTCATACT  |
| query    | CGTTGCCGTACCGTCGCTGCCGGTAGTGCCGGTAAAGACAATCCCGGTGGTGGTCATACT  |
| template | TTGGCTGGCGCTTGCGGGAGTCAGCTCTTTAAGCATGAGATCGTCTGCTCCGGCATCCGC  |
| query    | TTGGCTGGCGCTTGCGGGAGTCAGCTCTTTAAGCATGAGATCGTCTGCTCCGGCATCCGC  |
| template | TGCCACGTCGCCATCCGTTATCACCATACCTGCCCGATTTTTCGAATCGCCACGTGACAA  |
| query    | TGCCACGTCGCCATCCGTTATCACCATACCTGCCCGATTTTTCGAATCGCCACGTGACAA  |
| template | CGTAAAACCGACGTTGGCGACCGGGTTACCGCTGCTATCTTTACCGTCACCGTTAACGG   |
| query    | CGTAAAACCGACGTTGGCGACCGGGTTACCGCTGCTATCTTTACCGTCACCGTTAACGG   |
| template | CATCGCGCTTCCCTTCGCCACTACCGCCGATTTTTCGCGCTGTCCATCGCCGTCGAGGT   |
| query    | CATCGCGCTTCCCTTCGCCACTACCGCCGATTTTTCGCGCTGTCCATCGCCGTCGAGGT   |
| template | CAGCGTAATACTGGCAGGAGTAGAAGTACGCGGCTCGACCAGACACACCTGAGCGCCGGT  |
| query    | CAGCGTAATACTGGCAGGAGTAGAAGTACGCGGCTCGACCAGACACACCTGAGCGCCGGT  |
| template | GGCAGTCGATGAACTGGCGGTGCCCTTACCGCCGCTATTCAGGTTTATAAATTGGTAATA  |
| query    | GGCAGTCGATGAACTGGCGGTGCCCTTACCGCCGCTATTCAGGTTTATAAATTGGTAATA  |
| template | TCCGGTATTCCGGCGACGATCCGCCGCCACCAAGATTGTTCCCGCCACCGGCCAGCC     |
| query    | TCCGGTATTCCGGCGACGATCCGCCGCCACCAAGATTGTTCCCGCCACCGGCCAGCC     |
| template | GTAATTTGTACCGATTGCGCCGTTAGGATTGTCGCTATACAACGTTTGCAGATCGCCCGA  |
| query    | GTAATTTGTACCGATTGCGCCGTTAGGATTGTCGCTATACAACGTTTGCAGATCGCCCGA  |
| template | CAACGGCTGGTATTCCGCATCACAGCCGGTTGCGCCCGCTTTTTCAGTGTTGCTGCGGT   |
| query    | CAACGGCTGGTATTCCGCATCACAGCCGGTTGCGCCCGCTTTTTCAGTGTTGCTGCGGT   |
| template | GACTAAGGGCCATGTTTCATTGTTAACCAGGTAAGTACCGCTATTCGACGTCATCTCCGC  |
| query    | GACTAAGGGCCATGTTTCATTGTTAACCAGGTAAGTACCGCTATTCGACGTCATCTCCGC  |

|          |                                                                |
|----------|----------------------------------------------------------------|
| template | CGCCAGCAGCGGACGCCGGAACCTCACGCCCGCGCTGTTGGTTACGGTTTCCGGCATGTG   |
| query    | CGCCAGCAGCGGACGCCGGAACCTCACGCCCGCGCTGTTGGTTACGGTTTCCGGCATGTG   |
| template | TCCCCAGTATTAGCTTTATCACTGTCCGGGCTGGTAATGACGGTGAAAAATGACGTCCAT   |
| query    | TCCCCAGTATTAGCTTTATCACTGTCCGGGCTGGTAATGACGGTGAAAAATGACGTCCAT   |
| template | ATCGCTAACTGTCAGCGGATCGTCGACAAGCATCGCCTGTAGCGGTGTTCTCAGGCCACG   |
| query    | ATCGCTAACTGTCAGCGGATCGTCGACAAGCATCGCCTGTAGCGGTGTTCTCAGGCCACG   |
| template | GGAATCATCCTGCGTCAC TTCAGTTGCGCTTTACCATCCTCATCCGTAATGCCATACCA   |
| query    | GGAATCATCCTGCGTCAC TTCAGTTGCGCTTTACCATCCTCATCCGTAATGCCATACCA   |
| template | ATAACTTGTGCACGAAGATACCGTGCAGTTAAACGTCATTGAGCCCGTAGACGGCGCAAC   |
| query    | ATAACTTGTGCACGAAGATACCGTGCAGTTAAACGTCATTGAGCCCGTAGACGGCGCAAC   |
| template | CGATGTGAGTACC-TGCCTCCGCCGGAACGCCATCAACGACACCCGCCCGGTCTATCGA    |
| query    | CGATGTGAGTACCATGCCTCCGCCGGAACGCCATCAACGACACCCGCCCGGTCTATCGA    |
| template | AAGCGTTCGTCCCAAACGGATAGCGGTATTGGGCTGCGGCGTGCCGGAACCATCCCTCAC   |
| query    | AAGCGTTCGTCCCAAACGGATAGCGGTATTGGGCTGCGGCGTGCCGGAACCATCCCTCAC   |
| template | AGTGACGGTCAACGGCAGGCTCTCGCCCTTCTTCGCCACTGGAGCGCCTTTATCCGCATC   |
| query    | AGTGACGGTCAACGGCAGGCTCTCGCCCTTCTTCGCCACTGGAGCGCCTTTATCCGCATC   |
| template | CATGTCGCTGGAAGTGAGTTCTATCGACAAGTCCCGGCGCTTTGCCAGACAAAGCTGCGC   |
| query    | CATGTCGCTGGAAGTGAGTTCTATCGACAAGTCCCGGCGCTTTGCCAGACAAAGCTGCGC   |
| template | CGTGGCGGTATTGGCTTTGGTTGTGTCAGCGTATTATTATCGCTGAGTCTGACATACTGAAA |
| query    | CGTGGCGGTATTGGCTTTGGTTGTGTCAGCGTATTATTATCGCTGAGTCTGACATACTGAAA |
| template | CTGACTGTCTGAGTGCGTGGCATCCGGTACTGAGTTACCCGCCCCCAATATTTTCCTGA    |
| query    | CTGACTGTCTGAGTGCGTGGCATCCGGTACTGAGTTACCCGCCCCCAATATTTTCCTGA    |
| template | TGCCACCGGTAGGCCAAGCGTTGTCGTGAGTGCGCCATTGGGATAATCGGTATATAGCGT   |
| query    | TGCCACCGGTAGGCCAAGCGTTGTCGTGAGTGCGCCATTGGGATAATCGGTATATAGCGT   |
| template | CTGTAAATCATTTACCGTCGGCAACCCAGCCGATCGCACGGGCTGGCGGTGTCTGATA     |
| query    | CTGTAAATCATTTACCGTCGGCAACCCAGCCGATCGCACGGGCTGGCGGTGTCTGATA     |
| template | CATATTCGGATAACGGCTCCAGGTATACCAGGTCTCGTTATTTTCCGTATAACCCGACGT   |
| query    | CATATTCGGATAACGGCTCCAGGTATACCAGGTCTCGTTATTTTCCGTATAACCCGACGT   |
| template | GTCCGCCGTTGAAGAAAGTTCAGCGCGCAGCAGCGGTGCGTTAAATTCAACCCCTTACT    |
| query    | GTCCGCCGTTGAAGAAAGTTCAGCGCGCAGCAGCGGTGCGTTAAATTCAACCCCTTACT    |
| template | GTTGGTAAAGGTTTCCGGCATATGGCCCCAGTATTTGGCCTTATCGCTGTCCGGGCTGGT   |
| query    | GTTGGTAAAGGTTTCCGGCATATGGCCCCAGTATTTGGCCTTATCGCTGTCCGGGCTGGT   |
| template | CACTACGGTAAAGATTGCGTCTTTGCTGTCTGTGTCAGGTTGCTGCCGTCCATCGTGGCGGC |
| query    | CACTACGGTAAAGATTGCGTCTTTGCTGTCTGTGTCAGGTTGCTGCCGTCCATCGTGGCGGC |
| template | GCTGATAGTGGTTTTTAACCGGCGGTACTGTCTGCGCAAGGGTAAATGTCACCTGTCC     |
| query    | GCTGATAGTGGTTTTTAACCGGCGGTACTGTCTGCGCAAGGGTAAATGTCACCTGTCC     |
| template | CTGGGCATCAGTTTGCGCATACAGATATTTGCGCGAGGTATCCAGCAGGTATGTCGCCAG   |
| query    | CTGGGCATCAGTTTGCGCATACAGATATTTGCGCGAGGTATCCAGCAGGTATGTCGCCAG   |
| template | GCCGGACGGCATCACATTACGCAGCGTAATATCGTCTGTGATGCTTGAGGACGATGTGGC   |
| query    | GCCGGACGGCATCACATTACGCAGCGTAATATCGTCTGTGATGCTTGAGGACGATGTGGC   |
| template | GCTGTTGGCGGATTGTACGAAGATCCGCGGCTGATTTTCACCATCACGTTTTTCATCGG    |
| query    | GCTGTTGGCGGATTGTACGAAGATCCGCGGCTGATTTTCACCATCACGTTTTTCATCGG    |
| template | CTGACCTGCGGCGTCTTTCACGTCGATGGTGGCGGCCATCTGCTCGCCCTTCTTCGCCTT   |
| query    | CTGACCTGCGGCGTCTTTCACGTCGATGGTGGCGGCCATCTGCTCGCCCTTCTTCGCCTT   |
| template | TGCGCTTCCGGTGGTTTTCATCTGGCCTGCCAGCGTCAGCGTCAGGCTGGCGGCGGCGCT   |
| query    | TGCGCTTCCGGTGGTTTTCATCTGGCCTGCCAGCGTCAGCGTCAGGCTGGCGGCGGCGCT   |

|                |                                                                                                                                |
|----------------|--------------------------------------------------------------------------------------------------------------------------------|
| template query | GCGCGGCGAGGCAAGACAGGCTGCGATGTAGTACATCGAGGTGCTGGTCGTCGTTTTGACGCGCGGCGAGGCAAGACAGGCTGCGATGTAGTACATCGAGGTGCTGGTCGTCGTTTTGAC       |
| template query | ATCATTGCCGTCGTTAAACAGGTTGACCGCCGCATAGAGCGACTTCGTGCCGTCGTACGAATCATTGCCGTCGTTAAACAGGTTGACCGCCGCATAGAGCGACTTCGTGCCGTCGTACGA       |
| template query | TATCACGTAATCCCCGCCACCAGTAGCGGCTGACGTTGTTGTTGCCTGAACTGGTCATATCACGTAATCCCCGCCACCAGTAGCGGCTGACGTTGTTGTTGCCTGAACTGGTCAT            |
| template query | CGGCCAGCCGTTACGGCTGCGCATGGCGTTATCCGGGTATGTCCCGTACAGTGTCTGGAGCGGCCAGCCGTTACGGCTGCGCATGGCGTTATCCGGGTATGTCCCGTACAGTGTCTGGAG       |
| template query | GTTGGCTACGGTCGGTAGCGTGTGCGGCCACAGCCGCCACCGGTGCCGTTCCAGGCTTTGTTGGCTACGGTCGGTAGCGTGTGCGGCCACAGCCGCCACCGGTGCCGTTCCAGGCTTT         |
| template query | ATCGACGGTTATCATGCCCCAGGTTTCGCCCTTGTCTGTAGTAGCCGTTGGCGATGGTCAGATCGACGGTTATCATGCCCCAGGTTTCGCCCTTGTCTGTAGTAGCCGTTGGCGATGGTCAG     |
| template query | CGTTTTGCCGGGCGTAGCGCTAAACTCGCTGGCCAGCAGCGGACGCCTGTACGCCACGCCCGTTTTGCCGGGCGTAGCGCTAAACTCGCTGGCCAGCAGCGGACGCCTGTACGCCACGCC       |
| template query | GCTGCTGTCGGTCAGCGTTTCCGCCATATGGCCCCAGTAGTTGGCCTTCGGCGTGTCCGGCTGCTGTCGGTCAGCGTTTCCGCCATATGGCCCCAGTAGTTGGCCTTCGGCGTGTCCGG        |
| template query | ACTGGTGACCACGGTAAAGATGACCGGCAGCGGCGCGCTCGTTACGCCGTTGTGTTCTATACTGGTGACCACGGTAAAGATGACCGGCAGCGGCGCGCTCGTTACGCCGTTGTGTTCTAT       |
| template query | CGCCGCCGTCAGCGGCGTTTTAAAGCCCGCGCCGCTGTCCTGGCTGATATTACGCGTCAGCGCCGCGTCAGCGGCGTTTTAAAGCCCGCGCGCTGTCCTGGCTGATATTACGCGTCAG         |
| template query | TGTGCCGTCGGCGCCCGTGGCGGTGTAATAGTTAGCGCCGCTGCTACGCCCGTCGCTGTGTGTGCCGTCGGCGCCCGTGGCGGTGTAATAGTTAGCGCCGCTGCTACGCCCGTCGCTGTG       |
| template query | GTTTATCTGTATATCCGCCGCGCCGAGCTATTACCTCCTGATTGCGCGCCCGACGCTGTTTATCTGTATATCCGCCGCGCCGAGCTATTACCTCCTGATTGCGCGCCCGACGCT             |
| template query | GTCGCCGCGCGTAAAGATAACCGCGTGTGCGCGGCCGGGTTGCCCTGGGCATCCCGCGTGTGCGCGCGCGTAAAGATAACCGCGTGTGCGCGGCCGGGTTGCCCTGGGCATCCCGCGT         |
| template query | GGTGATGATGACCGGGATGGTCTCGCCGACTTTCGCTTTGGCGAATCCGTGCTGTCGTTGGTGATGATGACCGGGATGGTCTCGCCGACTTTCGCTTTGGCGAATCCGTGCTGTCGTT         |
| template query | ATACACAGGCGAAGTGAGCGTTATCTGCGTCGCCGCCGGATGGGCGTTTTGCAGGCAGACATACACAGGCGAAGTGAGCGTTATCTGCGTCGCCGCCGGATGGGCGTTTTGCAGGCAGAC       |
| template query | AAAAATAGAGTTGTTTCATTCCACAATAGCGAACCAGCGCCGCGTCGCGCAGATTAAATCGAATAATAGAGTTGTTTCATTCCACAATAGCGAACCAGCGCCGCGTCGCGCAGATTAAATCGA    |
| template query | CTTAACGTAGCGGTTTTGCGTACTCCGGCTCAAATCGGCGGTGCTGTCTGGTAGTTTTCTTAACGTAGCGGTTTTGCGTACTCCGGCTCAAATCGGCGGTGCTGTCTGGTAGTTTTT          |
| template query | ACCGTCCAGCGGCCAGCCCTGCTGCGTATTATGGCGCCGCCGGGCTGGCGTCGTACAGACCGTCCAGCGGCCAGCCCTGCTGCGTATTATGGCGCCGCCGGGCTGGCGTCGTACAG           |
| template query | CGATTGCATATCGGCAAGGGTCGGCACGTATCCCGCGCCGAGGCGTCGTTTCGCCATTTTCGATTGCATATCGGCAAGGGTCGGCACGTATCCCGCGCCGAGGCGTCGTTTCGCCATTTTC      |
| template query | AAAAATCGACGATTCCTCCACGCTTCGTTGTTTTCCGTAATTGTCGCCGTGGGTAACGCCGCTAAAAATCGACGATTCCTCCACGCTTCGTTGTTTTCCGTAATTGTCGCCGTGGGTAACGCCGCT |
| template query | GGCGATTTTCAGCCGATAACAGCGGGCGCTTAAACACCTCGCCGTTGGCCGCCGTCGTCGTGGCGATTTTCAGCCGATAACAGCGGGCGCTTAAACACCTCGCCGTTGGCCGCCGTCGTCGT     |
| template query | TTCCGGCATATGGCCCCACATTTTGGCTTTGTCGCTGTCCGGGCTGGTGACCACGGTGAAATTCGGCATATGGCCCCACATTTTGGCTTTGTCGCTGTCCGGGCTGGTGACCACGGTGAA       |
| template query | AATAGTGTGATGCTGGCCGTCGCGCTGGCGTTGTCGTACAGCGCCGCCGTAATCGCGACAATAGTGTGATGCTGGCCGTCGCGCTGGCGTTGTCGTACAGCGCCGCCGTAATCGCGAC         |
| template       | TTTCGTCCCCTGGGTGTCCGGGCGGGTGACGTTGATGATTTTGCTGCCGTTTTTACC                                                                      |

|          |                                                              |
|----------|--------------------------------------------------------------|
| query    | TTTCGTCGCCGTGGGTGTCGCGGCGGGTGACGTTTGCTGCCGTTTTACCGGT         |
| template | CATGCCGCCGATTTTGGTGGCGGTGTCGTTGAGCGAATCGCCGTCGATCACCACGCCGA  |
| query    | CATGCCGCCGATTTTGGTGGCGGTGTCGTTGAGCGAATCGCCGTCGATCACCACGCCGA  |
| template | GACGATGCCGTCGCCGCTACCGGCATATGTTTCTCCCCCTGGCGGGTATAGCCGTCGCC  |
| query    | GACGATGCCGTCGCCGCTACCGGCATATGTTTCTCCCCCTGGCGGGTATAGCCGTCGCC  |
| template | GCGGCTTAACACGAACGGCGCTTGCGGCAGCGGATTGCCGCTGGCGTCTTTTACCGTCAC |
| query    | GCGGCTTAACACGAACGGCGCTTGCGGCAGCGGATTGCCGCTGGCGTCTTTTACCGTCAC |
| template | TTTAAGCTGGAGCGTATCGCCCTTTTACCTTCACCGCGTGTCGCTGTTTGC GTTATA   |
| query    | TTTAAGCTGGAGCGTATCGCCCTTTTACCTTCACCGCGTGTCGCTGTTTGC GTTATA   |
| template | CCACAATGCCGCATTCACCGGCTCAATGGTGATAGACGCCGCCGTCGGATTTTGTGTAC  |
| query    | CCACAATGCCGCATTCACCGGCTCAATGGTGATAGACGCCGCCGTCGGATTTTGTGTAC  |
| template | CAGACAGCTCAGTAGTCCGACGCATCGCCGGAAGCGGTATAGCCGCCCGCAGCCAGTGA  |
| query    | CAGACAGCTCAGTAGTCCGACGCATCGCCGGAAGCGGTATAGCCGCCCGCAGCCAGTGA  |
| template | TACCGCTGCCATGTAGCGGCGCTGGCGAAGGTGGATGACCAGTAGTCATACTCAGTCGG  |
| query    | TACCGCTGCCATGTAGCGGCGCTGGCGAAGGTGGATGACCAGTAGTCATACTCAGTCGG  |
| template | CCAGCCGGATACGGTGTGGATTTATTGCCGTCGCTGGAGGCATACAGTGCGGCAAGCTG  |
| query    | CCAGCCGGATACGGTGTGGATTTATTGCCGTCGCTGGAGGCATACAGTGCGGCAAGCTG  |
| template | ATCGGCGCGGGCAGATGGCCGGCCTCGCAGCCCCGGCGTTGGGGTTATTACAGCGCTC   |
| query    | ATCGGCGCGGGCAGATGGCCGGCCTCGCAGCCCCGGCGTTGGGGTTATTACAGCGCTC   |
| template | GGCGTGGCTGACACGCGCCAGGTTTCGTTATCCTGCTCCTGGGTACGGGTGGCGGCAGT  |
| query    | GGCGTGGCTGACACGCGCCAGGTTTCGTTATCCTGCTCCTGGGTACGGGTGGCGGCAGT  |
| template | CGCTTCGCGCCAGCTTTGGCCGCTGGAATTTCATATCACCACGGTGAGCGTGTCGCG    |
| query    | CGCTTCGCGCCAGCTTTGGCCGCTGGAATTTCATATCACCACGGTGAGCGTGTCGCG    |
| template | CATATGACCCACATCTGCGCCTCCGGCGTATCGGGGCTGGTGGCAACGGTAAATTTAC   |
| query    | CATATGACCCACATCTGCGCCTCCGGCGTATCGGGGCTGGTGGCAACGGTAAATTTAC   |
| template | GCTGCGGTTGACGGGCGTGGTAATCAGTGAGTTGACCGGCAGTACGCTCAGCGGCGTCAG |
| query    | GCTGCGGTTGACGGGCGTGGTAATCAGTGAGTTGACCGGCAGTACGCTCAGCGGCGTCAG |
| template | CAAGCCCACGCCCTGCGGCTGTTCAATCACCAGCGTGGCGTTGCCCTCGGCATCGGTCAT |
| query    | CAAGCCCACGCCCTGCGGCTGTTCAATCACCAGCGTGGCGTTGCCCTCGGCATCGGTCAT |
| template | GCCCTGGTACGTCATCGACGCCTGGGAAGAGCCGAAAGGCGTTCCGCCATCACCAGCGT  |
| query    | GCCCTGGTACGTCATCGACGCCTGGGAAGAGCCGAAAGGCGTTCCGCCATCACCAGCGT  |
| template | TCCGTCGCTGGGATCGGTAAAGCCCGTGGTGGCGTTGTCGCGATTTTGGCGTGCACAT   |
| query    | TCCGTCGCTGGGATCGGTAAAGCCCGTGGTGGCGTTGTCGCGATTTTGGCGTGCACAT   |
| template | GGTGACGGTAAAGCTGGCGTTAGGCACGCTTAACCCATTAGCGCATTGACGGAATGGAC  |
| query    | GGTGACGGTAAAGCTGGCGTTAGGCACGCTTAACCCATTAGCGCATTGACGGAATGGAC  |
| template | GTTCATCGTGATTTGTTGCGCGACTTTGGCTACCGCATTGCGTAACGACTCATCGCCATT |
| query    | GTTCATCGTGATTTGTTGCGCGACTTTGGCTACCGCATTGCGTAACGACTCATCGCCATT |
| template | AAAGTAAACGTCCAGACTGGTCACCAACTCATTGCCGGAGCAGGAGAGATAGTTCGGTTC |
| query    | AAAGTAAACGTCCAGACTGGTCACCAACTCATTGCCGGAGCAGGAGAGATAGTTCGGTTC |
| template | GGTGCCGCTGAACGTGCTGTCCGCACCGGTGCCAGGTTGACGTGCGCGGTGGTGGAAAC  |
| query    | GGTGCCGCTGAACGTGCTGTCCGCACCGGTGCCAGGTTGACGTGCGCGGTGGTGGAAAC  |
| template | ATCAGTATCCGCCGATATAGCTGTGTTTCTGCGTCGGCCAGCCGTAGGTCGTTTCCAT   |
| query    | ATCAGTATCCGCCGATATAGCTGTGTTTCTGCGTCGGCCAGCCGTAGGTCGTTTCCAT   |
| template | CGCGTTGCCGGAATGGGCTGATACAGCGTATCCAGCAACAGTTGCCCCGGCACCTGGCC  |
| query    | CGCGTTGCCGGAATGGGCTGATACAGCGTATCCAGCAACAGTTGCCCCGGCACCTGGCC  |
| template | GGTACCGCACTGGTTCGTCGCCGCCGTTACCGAGTTAAACGTCGCCCAGTATTCGTTATT |
| query    | GGTACCGCACTGGTTCGTCGCCGCCGTTACCGAGTTAAACGTCGCCCAGTATTCGTTATT |

|          |                                                               |
|----------|---------------------------------------------------------------|
| template | CTCAAATTCGGAACCGGTATCCTGCGCGGCTTCGTCCGCCAGCAGCGGGCGTTTGTAGAT  |
| query    | CTCAAATTCGGAACCGGTATCCTGCGCGGCTTCGTCCGCCAGCAGCGGGCGTTTGTAGAT  |
| template | ATTGCCCGCTTCCACCACGCCCTGCATATGGCCCCACATGCGCGCCTGCGCCACGTCCGG  |
| query    | ATTGCCCGCTTCCACCACGCCCTGCATATGGCCCCACATGCGCGCCTGCGCCACGTCCGG  |
| template | GCTGGTGACGACGGTAAAAATCACGTTCTGCGTCGCTTCCGTGCCGTGGAACAGCACCAC  |
| query    | GCTGGTGACGACGGTAAAAATCACGTTCTGCGTCGCTTCCGTGCCGTGGAACAGCACCAC  |
| template | GCGCACCGGGGTTAATACGCCCGCCCCCTTGTCTGAGTCAACACCAGCGAGAACTGACC   |
| query    | GCGCACCGGGGTTAATACGCCCGCCCCCTTGTCTGAGTCAACACCAGCGAGAACTGACC   |
| template | GTTGGCGTCGGTGACGCCGTGATAGTGACCGTCGCTGCCTTCCAGATTGGTGATAATTAC  |
| query    | GTTGGCGTCGGTGACGCCGTGATAGTGACCGTCGCTGCCTTCCAGATTGGTGATAATTAC  |
| template | CGGATCATCCGTCCACTGATGCCGCTATCAATATCGGCGTTCTTTTGATTCTGGCGATT   |
| query    | CGGATCATCCGTCCACTGATGCCGCTATCAATATCGGCGTTCTTTTGATTCTGGCGATT   |
| template | TTGCTCGTCGCCAGGTAGACGTTAAAGTAGCGATAAGGCAGCGGTTTATTGGTGGCGCT   |
| query    | TTGCTCGTCGCCAGGTAGACGTTAAAGTAGCGATAAGGCAGCGGTTTATTGGTGGCGCT   |
| template | GTCGGTGACGGTGATCTTCATGTTGATCTCTTCGCCACCTTCACTTTCGCCGCGTTGAC   |
| query    | GTCGGTGACGGTGATCTTCATGTTGATCTCTTCGCCACCTTCACTTTCGCCGCGTTGAC   |
| template | CGTTGAATCAAAATTATCGGCGCTAATCACTAATTTGGCGTGACCGCAGGCGGGGCTTT   |
| query    | CGTTGAATCAAAATTATCGGCGCTAATCACTAATTTGGCGTGACCGCAGGCGGGGCTTT   |
| template | ATCCACGCAGCTAACCAGCGATTGCGTGCGTCCGGCATCTGCGTAAGGGCGCGGCTGCG   |
| query    | ATCCACGCAGCTAACCAGCGATTGCGTGCGTCCGGCATCTGCGTAAGGGCGCGGCTGCG   |
| template | CATATCAATGCTGATATGGTCAGTGGCAGTCGATCCCTGGGAGGAGGACCAGTACTCTTC  |
| query    | CATATCAATGCTGATATGGTCAGTGGCAGTCGATCCCTGGGAGGAGGACCAGTACTCTTC  |
| template | GTCACCGGATGTCAGCCCTACCGGCCAGCCGAGGGTGGTGGCCAGATCGCCGCGCCAAT   |
| query    | GTCACCGGATGTCAGCCCTACCGGCCAGCCGAGGGTGGTGGCCAGATCGCCGCGCCAAT   |
| template | TTTTAACCTTCCAGTTGGCGTGATCCGGCAGAATATCGCAGTGCGCGTCGGCGTGGCC    |
| query    | TTTTAACCTTCCAGTTGGCGTGATCCGGCAGAATATCGCAGTGCGCGTCGGCGTGGCC    |
| template | CCAGTTGAACTGCGCCAGGTTTCATTGTTGATGCTGGCGGTGCGGTCTTCACTGTCGGT   |
| query    | CCAGTTGAACTGCGCCAGGTTTCATTGTTGATGCTGGCGGTGCGGTCTTCACTGTCGGT   |
| template | TTCCGCCGCCAGTTTGGGGCGGTAAAAGGTGTAGCTTGCGCCGTCCACCGTGCGGTGGA   |
| query    | TTCCGCCGCCAGTTTGGGGCGGTAAAAGGTGTAGCTTGCGCCGTCCACCGTGCGGTGGA   |
| template | CGTCTCTCCCATATGACCGTACATGTTGGCGCTGCTGCTGTCCGGGCTGGTGAGGGTGGT  |
| query    | CGTCTCTCCCATATGACCGTACATGTTGGCGCTGCTGCTGTCCGGGCTGGTGAGGGTGGT  |
| template | AAAAATCACGTCCACGCTGGCTTTCAGCGCTGGCGCGCTCGACGGGTGCGCTATCAGCGG  |
| query    | AAAAATCACGTCCACGCTGGCTTTCAGCGCTGGCGCGCTCGACGGGTGCGCTATCAGCGG  |
| template | CGTTTTAACGCCCGGGCGGTTTCGCTGGGTGACGACCACGGTCGCCACGCCCTCGGCGTT  |
| query    | CGTTTTAACGCCCGGGCGGTTTCGCTGGGTGACGACCACGGTCGCCACGCCCTCGGCGTT  |
| template | GGTCGTACCGTGATATTCCGTGGCGGTGGTGGTCAGTTCCGGTGTTGCCGACGCGACCCGG |
| query    | GGTCGTACCGTGATATTCCGTGGCGGTGGTGGTCAGTTCCGGTGTTGCCGACGCGACCCGG |
| template | CGCGGCATTGTTTACCACGCCCTGGCGGTTTTGCGCGTCGCCGCGGGTAATCACGAAATC  |
| query    | CGCGGCATTGTTTACCACGCCCTGGCGGTTTTGCGCGTCGCCGCGGGTAATCACGAAATC  |
| template | AACGTTGCCCTCCGGTTCGCCGCCGAGTCCTTGGTCGTTACCGTCAGCATGATGCTTTC   |
| query    | AACGTTGCCCTCCGGTTCGCCGCCGAGTCCTTGGTCGTTACCGTCAGCATGATGCTTTC   |
| template | GCCCGCTTTGACCTTCGCGGCGTTGAGCGACTCATCCAGATGATCGGCGGCGAGCGTTAC  |
| query    | GCCCGCTTTGACCTTCGCGGCGTTGAGCGACTCATCCAGATGATCGGCGGCGAGCGTTAC  |
| template | CGGGTCGCCCACGGCGGGCGCGATATCCACGGCAAACTTTTGATCAAGCACTTCGACCGC  |
| query    | CGGGTCGCCCACGGCGGGCGCGATATCCACGGCAAACTTTTGATCAAGCACTTCGACCGC  |

|          |                                                               |
|----------|---------------------------------------------------------------|
| template | CGTGTTTATAAGGCACGCCGGTGCGGGTAAGCAACCACAGCGCGGTATGGCGGTTGAGGT  |
| query    | CGTGTTTATAAGGCACGCCGGTGCGGGTAAGCAACCACAGCGCGGTATGGCGGTTGAGGT  |
| template | ATCCAGTTGCGACCAGACCACCAGATGGCGGCCCGCCAGATTCTGCGCGCAGAAACTTAT  |
| query    | ATCCAGTTGCGACCAGACCACCAGATGGCGGCCCGCCAGATTCTGCGCGCAGAAACTTAT  |
| template | ATTGCTGACGGGTTGTGGATCAAGCGGCGTGTCGGCGTGCGGCGTCGGCCACACCAG     |
| query    | ATTGCTGACGGGTTGTGGATCAAGCGGCGTGTCGGCGTGCGGCGTCGGCCACACCAG     |
| template | CGTAACGGCGGGCGCGCGTTACGCCTGCCAGGCCAGCGGCGGCACGGCGAAGATATCGCC  |
| query    | CGTAACGGCGGGCGCGCGTTACGCCTGCCAGGCCAGCGGCGGCACGGCGAAGATATCGCC  |
| template | TTCGGTGTCGTGCGGATTGGTTAAGGTCAGCGCGCTGCCGACATCACTGGTGCTGAAGT   |
| query    | TTCGGTGTCGTGCGGATTGGTTAAGGTCAGCGCGCTGCCGACATCACTGGTGCTGAAGT   |
| template | GCTGGGCTTCGCGGAGTAGTCAACAGGATTGCGCGCATCAGAGCGCAACTGCACGCTGCC  |
| query    | GCTGGGCTTCGCGGAGTAGTCAACAGGATTGCGCGCATCAGAGCGCAACTGCACGCTGCC  |
| template | CTGATATACCGGGATCGTTACACTGTGCGCCTGAGGCGGAGTGCCATTAATAGCCGAGT   |
| query    | CTGATATACCGGGATCGTTACACTGTGCGCCTGAGGCGGAGTGCCATTAATAGCCGAGT   |
| template | TTGCTCAGTGAGTTCTTCCATGCGCCGCTTCTTCGCACGGCTGCGCGAAGAAAGGCGT    |
| query    | TTGCTCAGTGAGTTCTTCCATGCGCCGCTTCTTCGCACGGCTGCGCGAAGAAAGGCGT    |
| template | TAAACTGAGGGCGCATAGCAGCAGCCAGGGTAAAAAACGACACACTTTTTCGATTTCAC   |
| query    | TAAACTGAGGGCGCATAGCAGCAGCCAGGGTAAAAAACGACACACTTTTTCGATTTCAC   |
| template | TGACGTACCTGAGAAAAGTCCATTTTCGTTGCAGTTCATTCCATGAATACAAAAACGTAAA |
| query    | TGACGTACCTGAGAAAAGTCCATTTTCGTTGCAGTTCATTCCATGAATACAAAAACGTAAA |
| template | AATACATCGCTACCGGAACAGCGCCAGCTACAAGGGATACCCAGGTTGGGCGCCGCAAG   |
| query    | AATACATCGCTACCGGAACAGCGCCAGCTACAAGGGATACCCAGGTTGGGCGCCGCAAG   |
| template | CGTCACCCAACATTCAAACGCGCTCCCGGCCCATTTCCCATTCCTACGGCACCCGGCA    |
| query    | CGTCACCCAACATTCAAACGCGCTCCCGGCCCATTTCCCATTCCTACGGCACCCGGCA    |
| template | CGAGCCTAAGCCCGAGGTCGTGCTTTTTACGAGTACAGGTTGTCTGGCCGGTCGTTTC    |
| query    | CGAGCCTAAGCCCGAGGTCGTGCTTTTTACGAGTACAGGTTGTCTGGCCGGTCGTTTC    |
| template | GTTAAATGAACAGTAGTACTTATTGCTTTGACCTTCATCTTGCGACACATAGTCCCAGGA  |
| query    | GTTAAATGAACAGTAGTACTTATTGCTTTGACCTTCATCTTGCGACACATAGTCCCAGGA  |
| template | TGATGTCGTGCGCCATTGCAACGTGCCGATAACGCTCTGCAACGCTTTCAGATCGTCCAG  |
| query    | TGATGTCGTGCGCCATTGCAACGTGCCGATAACGCTCTGCAACGCTTTCAGATCGTCCAG  |
| template | CGAGGCTATATTTTCTGCGATCCGCAAAGATGCGTCAACGACGTTTCCACGTGTTTCGGA  |
| query    | CGAGGCTATATTTTCTGCGATCCGCAAAGATGCGTCAACGACGTTTCCACGTGTTTCGGA  |
| template | CTGATAATAATAGTTCGTCCCCAGAATTCATTATTAACGGCCAGGTATCCCGGGGCGC    |
| query    | CTGATAATAATAGTTCGTCCCCAGAATTCATTATTAACGGCCAGGTATCCCGGGGCGC    |
| template | GGCAGAGAGCTCGGCTTTCAGGTACGGGCGGCGCAGCGTAACGCCGTTACCTGCACGGT   |
| query    | GGCAGAGAGCTCGGCTTTCAGGTACGGGCGGCGCAGCGTAACGCCGTTACCTGCACGGT   |
| template | ATCCGGCATATGACCCAGTATGACGCATACGGCGTATCCGGGCTGGTTTGTACCGTAAA   |
| query    | ATCCGGCATATGACCCAGTATGACGCATACGGCGTATCCGGGCTGGTTTGTACCGTAAA   |
| template | GATTGCATCTACGCTCGCCGCTCATCAAATTGATTGCAAAACGCCGCGTGACAGACGT    |
| query    | GATTGCATCTACGCTCGCCGCTCATCAAATTGATTGCAAAACGCCGCGTGACAGACGT    |
| template | TTTTAACCCAGCGATTTATCCTGAGTTAACGTAACCGCAACTTACCGTCATCGCCGGT    |
| query    | TTTTAACCCAGCGATTTATCCTGAGTTAACGTAACCGCAACTTACCGTCATCGCCGGT    |
| template | GAAGCCAGACCATTTGTGCTGAGGCCATTCTGGTTATTAACGCCACTGCCGTACCCGC    |
| query    | GAAGCCAGACCATTTGTGCTGAGGCCATTCTGGTTATTAACGCCACTGCCGTACCCGC    |
| template | AGGTGCAACCGGCGCCAGCATCATATTCGCCGGCGAAGTTGTAACGGAACCGGCTCGCC   |
| query    | AGGTGCAACCGGCGCCAGCATCATATTCGCCGGCGAAGTTGTAACGGAACCGGCTCGCC   |
| template | AATCACGCCTGGTTCAATGTATTGCTTATCCACCGCACCGCGCAATAAGCGTAATCACG   |



|          |                                                                |
|----------|----------------------------------------------------------------|
| query    | AATCACGCCTGGTTCAATGTATTGCTTATCCACCGCACCGCGCAATAAGCGTAATCACG    |
| template | CGTCAACAGTACGGCCACCCGGCCTGCGGCTGCCCGGCGTCGTTAGTCACCGTTACCGT    |
| query    | CGTCAACAGTACGGCCACCCGGCCTGCGGCTGCCCGGCGTCGTTAGTCACCGTTACCGT    |
| template | CATCGGTATCGTTTCGCCTTTTTTCGCCACGGCCGCCGATTATCGGCGTTCCATGCGTC    |
| query    | CATCGGTATCGTTTCGCCTTTTTTCGCCACGGCCGCCGATTATCGGCGTTCCATGCGTC    |
| template | GGAAGAGAGCGCGATATTCAGCCCCTGCGCGATGTTGTAGGCAGAGTTGTAAGTAGTA     |
| query    | GGAAGAGAGCGCGATATTCAGCCCCTGCGCGATGTTGTAGGCAGAGTTGTAAGTAGTA     |
| template | GTTACCCGGGTTTTCCGACATGCTGTAGTTTTTCCCCGCTTTGAGATCTTTATACTGCCA   |
| query    | GTTACCCGGGTTTTCCGACATGCTGTAGTTTTTCCCCGCTTTGAGATCTTTATACTGCCA   |
| template | GTAAAGGGTTGAGCCTTTCAGCAGGCTATCCCCCGCCACCACCGCTTCCCGACGGGCAA    |
| query    | GTAAAGGGTTGAGCCTTTCAGCAGGCTATCCCCCGCCACCACCGCTTCCCGACGGGCAA    |
| template | TCCAATATCGGTCGCCACCTTGCCGCTTGGGTGATCGTTGTACAGCGCAGTGAAATCATC   |
| query    | TCCAATATCGGTCGCCACCTTGCCGCTTGGGTGATCGTTGTACAGCGCAGTGAAATCATC   |
| template | TATCGCAGCCATCTGGTTCATCGGACATCCGCCGTAATTACCGGTATTA AAACTATTAC   |
| query    | TATCGCAGCCATCTGGTTCATCGGACATCCGCCGTAATTACCGGTATTA AAACTATTAC   |
| template | CATGATCCAGTTTTCATTTGGTTTTCGAAATAGGTATCCGTGTGCGCCTTCGATGAGGGCTC |
| query    | CATGATCCAGTTTTCATTTGGTTTTCGAAATAGGTATCCGTGTGCGCCTTCGATGAGGGCTC |
| template | GCCTGCCACCAAGCGGGCGCTTAAACTCCGCACCGTTGCTGGCGGTGAAGGTCTCCGGCAT  |
| query    | GCCTGCCACCAAGCGGGCGCTTAAACTCCGCACCGTTGCTGGCGGTGAAGGTCTCCGGCAT  |
| template | ATGGCCGTACATGTTGGCCTTGTCGCTGTCCGGGCTGGTGAGGACGGTGAACACCACCGG   |
| query    | ATGGCCGTACATGTTGGCCTTGTCGCTGTCCGGGCTGGTGAGGACGGTGAACACCACCGG   |
| template | CAGCGATGAGGTCGCCGTGCGCGTATCGTTTCAAGATTCGCGGTGAGTGGTTTTTCAACCC  |
| query    | CAGCGATGAGGTCGCCGTGCGCGTATCGTTTCAAGATTCGCGGTGAGTGGTTTTTCAACCC  |
| template | TATGCCGCCGGGTTCCGCAAGCGTCAGGGCCAGCGTACCATCCGCGCCGTGGCGCCGGT    |
| query    | TATGCCGCCGGGTTCCGCAAGCGTCAGGGCCAGCGTACCATCCGCGCCGTGGCGCCGGT    |
| template | CAGAACCGATGTGGCATAGTAAACTGTTGCTGCGCACCGGTGAGCGGCGTCACCGTCAT    |
| query    | CAGAACCGATGTGGCATAGTAAACTGTTGCTGCGCACCGGTGAGCGGCGTCACCGTCAT    |
| template | GTTGGTGCCGTTAGTGGCTACAAATTTATTATAGTCAGGGTTGCGCGCCTTCCCGGCGTC   |
| query    | GTTGGTGCCGTTAGTGGCTACAAATTTATTATAGTCAGGGTTGCGCGCCTTCCCGGCGTC   |
| template | ACGTTTAAGCGAAAAAGTCGCATAAAGCACCGGGTTGCCCATCGCATCGGTAGTGGTGAT   |
| query    | ACGTTTAAGCGAAAAAGTCGCATAAAGCACCGGGTTGCCCATCGCATCGGTAGTGGTGAT   |
| template | GAGTAGCGGGATCGACTCGCTGTTTTTCGCCTTACC GCCTGAATAGCGTCATCCATCGC   |
| query    | GAGTAGCGGGATCGACTCGCTGTTTTTCGCCTTACC GCCTGAATAGCGTCATCCATCGC   |
| template | CTGCGGGGAGGTGAGGGTAATCTGCGTGGCCTGCGGCAGCGGCGTCGTGGCGCAAAATTG   |
| query    | CTGCGGGGAGGTGAGGGTAATCTGCGTGGCCTGCGGCAGCGGCGTCGTGGCGCAAAATTG   |
| template | ATACTGCCAGGCAGTGCTGGTCGCGCTGTTTTCTGACCGACGCGAACCATCAGCCAGATC   |
| query    | ATACTGCCAGGCAGTGCTGGTCGCGCTGTTTTCTGACCGACGCGAACCATCAGCCAGATC   |
| template | GACTGCGTAATAGAAGTCAAGTTTTGCCCCGCTGGAAAATGACGTCGAGTTCGATCCGCT   |
| query    | GACTGCGTAATAGAAGTCAAGTTTTGCCCCGCTGGAAAATGACGTCGAGTTCGATCCGCT   |
| template | CCAGTAAGAATAGTAGACCGGCCAGCCCTGGGCGGTATTTATCGTTTCGGCTCGGGTATTT  |
| query    | CCAGTAAGAATAGTAGACCGGCCAGCCCTGGGCGGTATTTATCGTTTCGGCTCGGGTATTT  |
| template | GCTGTAGAGCGAATCCAGCGCCTCAACGGCAGGGTAATAGCCCGCCGCGCAACGGGCCGG   |
| query    | GCTGTAGAGCGAATCCAGCGCCTCAACGGCAGGGTAATAGCCCGCCGCGCAACGGGCCGG   |
| template | ATTGGCCCTTCACTGGCTGGCCCATGAAAAACCGCCAGGTTTCGTTGGTTTCTTGCTT     |
| query    | ATTGGCCCTTCACTGGCTGGCCCATGAAAAACCGCCAGGTTTCGTTGGTTTCTTGCTT     |
| template | AGACGCAGTATTGTCCGTACTGGACAGCTCAGCGTACAGCAGCGGGCGCTGGTACACCGC   |
| query    | AGACGCAGTATTGTCCGTACTGGACAGCTCAGCGTACAGCAGCGGGCGCTGGTACACCGC   |

|          |                                                               |
|----------|---------------------------------------------------------------|
| template | GCCATCCGCCGCCGTACGCGATGGCGCCATATGCCCCACATGCGGGCAACGCTGACATC   |
| query    | GCCATCCGCCGCCGTACGCGATGGCGCCATATGCCCCACATGCGGGCAACGCTGACATC   |
|          |                                                               |
| template | CGGGCTGGTGACGACGGTAAAGATAGTGTGATGCTGGCACTCACGGCGGCATTTTCATA   |
| query    | CGGGCTGGTGACGACGGTAAAGATAGTGTGATGCTGGCACTCACGGCGGCATTTTCATA   |
|          |                                                               |
| template | CAGCGTCGCGTTAATCGCGGTGCGGGTGCCGTGGGTGTCCGGGCGGGTGACGCTGATGAT  |
| query    | CAGCGTCGCGTTAATCGCGGTGCGGGTGCCGTGGGTGTCCGGGCGGGTGACGCTGATGAT  |
|          |                                                               |
| template | ACGGGTGCCGTCAGTGCCGGTCTGCGACCCCATTTTGGTGGTGGTCCATGCCAGCGATT   |
| query    | ACGGGTGCCGTCAGTGCCGGTCTGCGACCCCATTTTGGTGGTGGTCCATGCCAGCGATT   |
|          |                                                               |
| template | GCCGTCGATCACACGGGCGTCACGATGCCTTGCAGATCGTCACCGTCCTGAGCGGTATA   |
| query    | GCCGTCGATCACACGGGCGTCACGATGCCTTGCAGATCGTCACCGTCCTGAGCGGTATA   |
|          |                                                               |
| template | CTTTTCGCCCCGGCGATCGTAACCGTCGCCGCGGGTGAGCACAAACGGCGCTTCGGGAT   |
| query    | CTTTTCGCCCCGGCGATCGTAACCGTCGCCGCGGGTGAGCACAAACGGCGCTTCGGGAT   |
|          |                                                               |
| template | CGGGTTGCCGCTGACGTCTTCACCGTCACCTTGAGCTGCATCGTCTCGCCCTTTTTCAC   |
| query    | CGGGTTGCCGCTGACGTCTTCACCGTCACCTTGAGCTGCATCGTCTCGCCCTTTTTCAC   |
|          |                                                               |
| template | TTTGACCGCGTGGACGTCGCTGCCGTCGTACCACTGCGACGATTGACCGGTTCAATGGT   |
| query    | TTTGACCGCGTGGACGTCGCTGCCGTCGTACCACTGCGACGATTGACCGGTTCAATGGT   |
|          |                                                               |
| template | GATGGACGCCGCCACCGGGTTATCGCTGGCCAGGCAGCTGGCGTAAATCGAGACGTTGCT  |
| query    | GATGGACGCCGCCACCGGGTTATCGCTGGCCAGGCAGCTGGCGTAAATCGAGACGTTGCT  |
|          |                                                               |
| template | GTTGGCAAATTCAGTGCCGTTCTGTCAGCGCGATCAGTTTCCAGGTGGTGGCGCTCTGGTA |
| query    | GTTGGCAAATTCAGTGCCGTTCTGTCAGCGCGATCAGTTTCCAGGTGGTGGCGCTCTGGTA |
|          |                                                               |
| template | GGTGGACGACCACTAGTTAAGATAGGTCGGCCAGCCCTGAATGCTGTGAATCTTGCCGCC  |
| query    | GGTGGACGACCACTAGTTAAGATAGGTCGGCCAGCCCTGAATGCTGTGAATCTTGCCGCC  |
|          |                                                               |
| template | GCTGTTGGCGTTATACAGCGCCTCAAGCTGGTCGATGCGCGGCAGGCGGTTGCGCCGCGA  |
| query    | GCTGTTGGCGTTATACAGCGCCTCAAGCTGGTCGATGCGCGGCAGGCGGTTGCGCCGCGA  |
|          |                                                               |
| template | GCCGCCCGCATCCGGGTTGCCACCGCGTCGCTATGGGCCACGCGGCCAGGTCTCATT     |
| query    | GCCGCCCGCATCCGGGTTGCCACCGCGTCGCTATGGGCCACGCGGCCAGGTCTCATT     |
|          |                                                               |
| template | GCTCTCGTCCTGGGTACGACGCGGGTTGCTCACTTCACCCGCCAGTTTGGGCCGCTCAAA  |
| query    | GCTCTCGTCCTGGGTACGACGCGGGTTGCTCACTTCACCCGCCAGTTTGGGCCGCTCAAA  |
|          |                                                               |
| template | GGTCCAGTCGCCCACGGTAATCGTGTGGCCATATGGCCCCACATTTTGGCCGCTGGCGT   |
| query    | GGTCCAGTCGCCCACGGTAATCGTGTGGCCATATGGCCCCACATTTTGGCCGCTGGCGT   |
|          |                                                               |
| template | ATCCGGGCTGGTGGCGACGGTAAACTTCACGCTGCGGGAAACCGCGTGCTGATTAATGA   |
| query    | ATCCGGGCTGGTGGCGACGGTAAACTTCACGCTGCGGGAAACCGCGTGCTGATTAATGA   |
|          |                                                               |
| template | ATCGACGGGCGCAATATTTAACGGCGTCAGCAGCCCCACGCCCTTTTCTGGGTGAGGAT   |
| query    | ATCGACGGGCGCAATATTTAACGGCGTCAGCAGCCCCACGCCCTTTTCTGGGTGAGGAT   |
|          |                                                               |
| template | AATGGTCGCATCGCCGTTAGCGTCGGTGATCCCGTGATAAACCTGCCCGGCAACGTAGCC  |
| query    | AATGGTCGCATCGCCGTTAGCGTCGGTGATCCCGTGATAAACCTGCCCGGCAACGTAGCC  |
|          |                                                               |
| template | CACGTCGTCAAACGTCATCTCGCCGTTGCTGGTATCGGTAAAGCCGGTCGTACGCCGTC   |
| query    | CACGTCGTCAAACGTCATCTCGCCGTTGCTGGTATCGGTAAAGCCGGTCGTACGCCGTC   |
|          |                                                               |
| template | ACGCCGCTGCCGTTGCCATGGTGATGGTGAAGTCGGTATTGCCGATCGCCATGCCGTT    |
| query    | ACGCCGCTGCCGTTGCCATGGTGATGGTGAAGTCGGTATTGCCGATCGCCATGCCGTT    |
|          |                                                               |
| template | AAGGGCGTTGCGCGAATGGATGTTATCTTAACCTGTTACCCACTTTGGCGTCGGCGTT    |
| query    | AAGGGCGTTGCGCGAATGGATGTTATCTTAACCTGTTACCCACTTTGGCGTCGGCGTT    |
|          |                                                               |
| template | TTTGATCACCGGGTCGTCGTTGAAGTAGACGTCCAGCACCGCCACCATTTTCATTGGCCGA |
| query    | TTTGATCACCGGGTCGTCGTTGAAGTAGACGTCCAGCACCGCCACCATTTTCATTGGCCGA |
|          |                                                               |
| template | GCAGGTCAGGTAGTTGGGCGTATCGGTAAATTTGCCGCTATCGCCGTTTTCGAGGTTGAC  |
| query    | GCAGGTCAGGTAGTTGGGCGTATCGGTAAATTTGCCGCTATCGCCGTTTTCGAGGTTGAC  |

|                |                                                                                                                                |
|----------------|--------------------------------------------------------------------------------------------------------------------------------|
| template query | GTGTACCGTCCCGAGGCGTCGCTGTCGGCGGCGATGAAATAATCTTCAGTCGGCCAGCCGTGTACCGTCCCGAGGCGTCGCTGTCGGCGGCGATGAAATAATCTTCAGTCGGCCAGCC         |
| template query | GTGCTCGCTTTCCATCTGTCCGCCGCATGTTGCTGTACAAATGCGCCAGCGACGACTG<br>GTGCTCGCTTTCCATCTGTCCGCCGCATGTTGCTGTACAAATGCGCCAGCGACGACTG       |
| template query | ATCCGGCACCTGGCCGACACCGCACTGCGCGGTGGCCGACGCCACGGAGTTAAACGTCGC<br>ATCCGGCACCTGGCCGACACCGCACTGCGCGGTGGCCGACGCCACGGAGTTAAACGTCGC   |
| template query | CCACTCTTCGTTATTTTCGCTGAATTGGCCGCTTTATGGCTGGCTCCACCGCCAGCAG<br>CCACTCTTCGTTATTTTCGCTGAATTGGCCGCTTTATGGCTGGCTCCACCGCCAGCAG       |
| template query | CGGACGTTTGACAGTTGCCCGCGTCCACCACGCCGCGCATATGGCCCCACATGTTGGC<br>CGGACGTTTGACAGTTGCCCGCGTCCACCACGCCGCGCATATGGCCCCACATGTTGGC       |
| template query | GCCGTCCACGTCCGGGCTGGTGACCACGGTGAAAATTACGCTAAAGGACAGCTCGACGTT<br>GCCGTCCACGTCCGGGCTGGTGACCACGGTGAAAATTACGCTAAAGGACAGCTCGACGTT   |
| template query | GCCGCC TTCGTCGTCGGCATCACGATGCGGATGGGCGTTTCGACGCCCAGGCCGCTGTT<br>GCCGCC TTCGTCGTCGGCATCACGATGCGGATGGGCGTTTCGACGCCCAGGCCGCTGTT   |
| template query | ATGTTTTAACGTCAGGTGCGCCTGGCCGTTGACGTCAGTACGCCGGTATAGTGCTCCGG<br>ATGTTTTAACGTCAGGTGCGCCTGGCCGTTGACGTCAGTACGCCGGTATAGTGCTCCGG     |
| template query | CGACGAGGCGCTACACCTTCGGAATCAACGGTGACCCGACGGTTATCCCATGCGTCCTG<br>CGACGAGGCGCTACACCTTCGGAATCAACGGTGACCCGACGGTTATCCCATGCGTCCTG     |
| template query | ATGTTCCCTTTGCGGTTTTTCGCCGGGTCGATAAACAGCTCCATGTAGCGGTAAAGCAG<br>ATGTTCCCTTTGCGGTTTTTCGCCGGGTCGATAAACAGCTCCATGTAGCGGTAAAGCAG     |
| template query | CGGTTTTTGCGTGTCCCGTCAACTACGGTCATCGTCAGATCAATCGACTCCCCACCTG<br>CGGTTTTTGCGTGTCCCGTCAACTACGGTCATCGTCAGATCAATCGACTCCCCACCTG       |
| template query | CGCTTTATACGGTCCTTGTTGGGAGAGAGTAATCTGCGGGTGCGCCGACGGCTGGGCTTT<br>CGCTTTATACGGTCCTTGTTGGGAGAGAGTAATCTGCGGGTGCGCCGACGGCTGGGCTTT   |
| template query | ATCCACACAACGACCAGCAGCGTGTGCTGTGCGCGGCCCTGACGACCGATGCGCTGTT<br>ATCCACACAACGACCAGCAGCGTGTGCTGTGCGCGGCCCTGACGACCGATGCGCTGTT       |
| template query | CATATGTACGGCAGCGTGGTAGCCGCTCAGTTGGTTTTTGGTCGATGACCAATATTCAGC<br>CATATGTACGGCAGCGTGGTAGCCGCTCAGTTGGTTTTTGGTCGATGACCAATATTCAGC   |
| template query | ATCGCCCGCCACCGGCCAGCCGGTCCAGGTTTCCAGCGTGCTGTGCTCATGTGCGATCTG<br>ATCGCCCGCCACCGGCCAGCCGGTCCAGGTTTCCAGCGTGCTGTGCTCATGTGCGATCTG   |
| template query | CACCAGCTGTTGCGCGTCCGGCAGAATGTCACAGTGGTTATCCGCGCCGCTCCAGGTAAA<br>CACCAGCTGTTGCGCGTCCGGCAGAATGTCACAGTGGTTATCCGCGCCGCTCCAGGTAAA   |
| template query | CAGCGCCAGGTTTTCGTTGGTATCGACGACGCTTTTGTGAGCGCCGCTCGCTTCCGCCGC<br>CAGCGCCAGGTTTTCGTTGGTATCGACGACGCTTTTGTGAGCGCCGCTCGCTTCCGCCGC   |
| template query | CAGCTTCGGGCGGGTGAAGGTGTAGGTTATACCGTTGAGCGTCGCGGTAGCGCTCTCTAT<br>CAGCTTCGGGCGGGTGAAGGTGTAGGTTATACCGTTGAGCGTCGCGGTAGCGCTCTCTAT   |
| template query | CATGTGGCCGTACATACTGGCCTTATCGCTGTCCGGGCTGGTGATGGTGGTGAAAAATGAC<br>CATGTGGCCGTACATACTGGCCTTATCGCTGTCCGGGCTGGTGATGGTGGTGAAAAATGAC |
| template query | GGCGGTTTCAGCCGTAAGCGCCGAAAGTTGACCGAGCTGACAACAGCGGCGTTTTGAC<br>GGCGGTTTCAGCCGTAAGCGCCGAAAGTTGACCGAGCTGACAACAGCGGCGTTTTGAC       |
| template query | GCCGGGGCCTTCCTTCTGGGTGACCACCACCGTGGCGTTGCCGTTGGCGTCAGTGACGCC<br>GCCGGGGCCTTCCTTCTGGGTGACCACCACCGTGGCGTTGCCGTTGGCGTCAGTGACGCC   |
| template query | GCGATATTCCGTTTGGGTGGTCGTGAGCTCGGTATCGCCAACGCGAACC GGTTGGCGTT<br>GCGATATTCCGTTTGGGTGGTCGTGAGCTCGGTATCGCCAACGCGAACC GGTTGGCGTT   |
| template query | ATTGACCACACCTGGCGGTTTTCCGCATCTTTACGGCGGATGACAAACGGCGCGTTGCC<br>ATTGACCACACCTGGCGGTTTTCCGCATCTTTACGGCGGATGACAAACGGCGCGTTGCC     |
| template       | TTCGGGCGTGCCGTCGCACGCTTTGGTGGAGATGGTGAGGGTGATGCTTTCCCCACCTT                                                                    |

|          |                                                                |
|----------|----------------------------------------------------------------|
| query    | TTCGGGCGTGCCGTGCGACGCTTTGGTGGAGATGGGTGATGCTTCCCCACCTT          |
| template | CACTTTGTATGCTCAAAGGCCGAATCAACGTGATCGCCGCTGACTGTAACGGCGTGT      |
| query    | CACTTTGTATGCTCAAAGGCCGAATCAACGTGATCGCCGCTGACTGTAACGGCGTGT      |
| template | GGTGGCCGGTTTAATGTTGAGCGCCACTTTCGGGCTTAACAGCGGAATGGTCGCATAATT   |
| query    | GGTGGCCGGTTTAATGTTGAGCGCCACTTTCGGGCTTAACAGCGGAATGGTCGCATAATT   |
| template | CGGCACCCCGGTACGCGTAAAGAGCCACAGCGGGGAACGTTGGTTTCATCTTCCACCTG    |
| query    | CGGCACCCCGGTACGCGTAAAGAGCCACAGCGGGGAACGTTGGTTTCATCTTCCACCTG    |
| template | CGCCCAGGCCACCACTGTGCGCCGGCGAGGTTTGGGCGCAAAAGGTCAGGTTTCGGAAC    |
| query    | CGCCCAGGCCACCACTGTGCGCCGGCGAGGTTTGGGCGCAAAAGGTCAGGTTTCGGAAC    |
| template | CGGCTGCGGCGAGAGCGCGTGTGCGGCGTGGCGGCATCGGCCATACCAGGCCATGGC      |
| query    | CGGCTGCGGCGAGAGCGCGTGTGCGGCGTGGCGGCATCGGCCATACCAGGCCATGGC      |
| template | GGGCGGCTGGCGGTTTTCCAGGCGATGGTGGGCGGATCGCTAAAGAGATCGCCTTCGGT    |
| query    | GGGCGGCTGGCGGTTTTCCAGGCGATGGTGGGCGGATCGCTAAAGAGATCGCCTTCGGT    |
| template | ATCGGTGGAATTGACGCGCCGCATCGAGGTTGAGGTAGCATCCGCGCTAAAATCGCGCGG   |
| query    | ATCGGTGGAATTGACGCGCCGCATCGAGGTTGAGGTAGCATCCGCGCTAAAATCGCGCGG   |
| template | CATGGCGCTGAATTCAATATCGTGGGTTTGCTCGGGTCAAGCAGCGTACTTCCCTGGTA    |
| query    | CATGGCGCTGAATTCAATATCGTGGGTTTGCTCGGGTCAAGCAGCGTACTTCCCTGGTA    |
| template | AAGGGGGATAATAGCGCCGTCGGCCAGCGGCGCGGTGCCGTTAACCGCACCGGTGACTGA   |
| query    | AAGGGGGATAATAGCGCCGTCGGCCAGCGGCGCGGTGCCGTTAACCGCACCGGTGACTGA   |
| template | GTTCAGCTCTTGCCAGGTTCCGCCCTTCAATAGCGCCTGCGCAGGTGCGATCGACACTGC   |
| query    | GTTCAGCTCTTGCCAGGTTCCGCCCTTCAATAGCGCCTGCGCAGGTGCGATCGACACTGC   |
| template | AAACATGATCAGTAATGTCAGTAAGAAATGTACAACCTTTATTCACTTGCCGATTCTGTG   |
| query    | AAACATGATCAGTAATGTCAGTAAGAAATGTACAACCTTTATTCACTTGCCGATTCTGTG   |
| template | CATGAGCGATAGCCACCCGTTTTCATTTCTGTGCGTAATTCAACCCACTTTGCTTAGCGC   |
| query    | CATGAGCGATAGCCACCCGTTTTCATTTCTGTGCGTAATTCAACCCACTTTGCTTAGCGC   |
| template | GCGGCTAAGCAAAGTGCGCGGAAAAATACCACTCCCCGCGGGGAGTGGTATGTTGAGGACA  |
| query    | GCGGCTAAGCAAAGTGCGCGGAAAAATACCACTCCCCGCGGGGAGTGGTATGTTGAGGACA  |
| template | ACTTATTTGCGTTTGTAGTCGATGGACAGACCAAAGCCCTGGACACCGTCGCTACCCAG    |
| query    | ACTTATTTGCGTTTGTAGTCGATGGACAGACCAAAGCCCTGGACACCGTCGCTACCCAG    |
| template | GTAACGCCGCCGTCTGCTCCCTCGAACGCCGTTTTCGCTTCGGCGTTGGTGACAGGGATG   |
| query    | GTAACGCCGCCGTCTGCTCCCTCGAACGCCGTTTTCGCTTCGGCGTTGGTGACAGGGATG   |
| template | ACAAGGTCTTTATCGTTCCAGCTTTCGTTGACGATACCGCCGGTACCGGTACCTGCAATT   |
| query    | ACAAGGTCTTTATCGTTCCAGCTTTCGTTGACGATACCGCCGGTACCGGTACCTGCAATT   |
| template | TTACTGGTGCCGACGAATTTCCAGCGGTAGTCATACTGGTCGGTAACGTTTTACCCGGCA   |
| query    | TTACTGGTGCCGACGAATTTCCAGCGGTAGTCATACTGGTCGGTAACGTTTTACCCGGCA   |
| template | TCATAGGTACCGTTGCCGTTCTTATCGCTCCACAGCAATACCTGATAGGTGGTATTCGTT   |
| query    | TCATAGGTACCGTTGCCGTTCTTATCGCTCCACAGCAATACCTGATAGGTGGTATTCGTT   |
| template | TTGAGTGTCGTCCTGAATTCTTCAACAGGTTGGTATTCGAATCTTCTCATGAATAACC     |
| query    | TTGAGTGTCGTCCTGAATTCTTCAACAGGTTGGTATTCGAATCTTCTCATGAATAACC     |
| template | ACATGGACGTTTTTCATCCACCACCGGACCTTCCGGAATTTTCGTATCATATCCGAACCACG |
| query    | ACATGGACGTTTTTCATCCACCACCGGACCTTCCGGAATTTTCGTATCATATCCGAACCACG |
| template | CCCGCATCGGTCGACAGGTCTTTCAACAGCAGTTCGGTTGCCACGGCAGGGTCACCGGTG   |
| query    | CCCGCATCGGTCGACAGGTCTTTCAACAGCAGTTCGGTTGCCACGGCAGGGTCACCGGTG   |
| template | GTAGTGTTGGCGTGATTTTGATACCGATATAACGATCCGCATCAGCGGCTGGATTTC      |
| query    | GTAGTGTTGGCGTGATTTTGATACCGATATAACGATCCGCATCAGCGGCTGGATTTC      |
| template | TAACTGTCACCAAGTACCAAGATCTTTGGGGTCGCTGCCATTCTGATCGCTAAAGCTCACC  |
| query    | TAACTGTCACCAAGTACCAAGATCTTTGGGGTCGCTGCCATTCTGATCGCTAAAGCTCACC  |

|          |                                                              |
|----------|--------------------------------------------------------------|
| template | CATTTACGGTGGCTTTAGTTGCCGTGTTGTCGGTGTCCAGGTCGCCTTCCGTATCGCCA  |
| query    | CATTTACGGTGGCTTTAGTTGCCGTGTTGTCGGTGTCCAGGTCGCCTTCCGTATCGCCA  |
|          |                                                              |
| template | ATCGCCAGTTACCGTGACCTTATCGCCAACGTGGAAGTCTTATCGCCTTCGGTCACA    |
| query    | ATCGCCAGTTACCGTGACCTTATCGCCAACGTGGAAGTCTTATCGCCTTCGGTCACA    |
|          |                                                              |
| template | ATTTTACGATCGCCGCGATCGATAGTTACCGTTACGTGATCTTTGTCGGTATCCGCAGTT |
| query    | ATTTTACGATCGCCGCGATCGATAGTTACCGTTACGTGATCTTTGTCGGTATCCGCAGTT |
|          |                                                              |
| template | TTATCCGCCGCACGGGTAATCCACGGCACCGTACCCTGAATGGTGCCCGTCTGTTCAAG  |
| query    | TTATCCGCCGCACGGGTAATCCACGGCACCGTACCCTGAATGGTGCCCGTCTGTTCAAG  |
|          |                                                              |
| template | ACAATCTGCCACTGCCCCGATTTCAGATTACCGTTTGCCGCCACCGCTGGCGCGGCGCAA |
| query    | ACAATCTGCCACTGCCCCGATTTCAGATTACCGTTTGCCGCCACCGCTGGCGCGGCGCAA |
|          |                                                              |
| template | TACCCGGCAACTACTAATGCTAAAGCGACCTTCGTCAGCCGCCGTTTACTGTTGCTTGC  |
| query    | TACCCGGCAACTACTAATGCTAAAGCGACCTTCGTCAGCCGCCGTTTACTGTTGCTTGC  |
|          |                                                              |
| template | ATTCAAGTCTCTCTTTTCTCAAATTCAGCGGCTGGCTGGTCAGCCACAACGCTGACGC   |
| query    | ATTCAAGTCTCTCTTTTCTCAAATTCAGCGGCTGGCTGGTCAGCCACAACGCTGACGC   |
|          |                                                              |
| template | TATTTCTGACTATACGTAACGCGTATGCCGTAACCTGAACGCCATCTTCCACATTGGCG  |
| query    | TATTTCTGACTATACGTAACGCGTATGCCGTAACCTGAACGCCATCTTCCACATTGGCG  |
|          |                                                              |
| template | GCAAACTTCTGCGCCGCCTCTTTATTGGTTACTGGCAGGACAAGATCTTCATTATGGTG  |
| query    | GCAAACTTCTGCGCCGCCTCTTTATTGGTTACTGGCAGGACAAGATCTTCATTATGGTG  |
|          |                                                              |
| template | TTGGCCAGCGCGCCGGTATGTCCGTTTGTAATCTGCCCCGTTAACTCCCACTGGTAGTCG |
| query    | TTGGCCAGCGCGCCGGTATGTCCGTTTGTAATCTGCCCCGTTAACTCCCACTGGTAGTCG |
|          |                                                              |
| template | TACAGCGCCATCTCTTCTTCCGTGAGCTGCTCGGACATCTGGAATACGCCGCTTTATTT  |
| query    | TACAGCGCCATCTCTTCTTCCGTGAGCTGCTCGGACATCTGGAATACGCCGCTTTATTT  |
|          |                                                              |
| template | TTGTCGCGCCACAGCAGGAAACGGTAAGCATTATTGACCGTAGGGTGCTTATCTTCTTG  |
| query    | TTGTCGCGCCACAGCAGGAAACGGTAAGCATTATTGACCGTAGGGTGCTTATCTTCTTG  |
|          |                                                              |
| template | CCGATAAGGTTGACAGGGTTGGCGGCTTTGACCTGATAAATCACCGCATTACGCGCGCTC |
| query    | CCGATAAGGTTGACAGGGTTGGCGGCTTTGACCTGATAAATCACCGCATTACGCGCGCTC |
|          |                                                              |
| template | AGGTTGTGCGCGATAAAAGTGACATCAACGTAGTTACTGTGCCATAGGCGTCTGCTTTT  |
| query    | AGGTTGTGCGCGATAAAAGTGACATCAACGTAGTTACTGTGCCATAGGCGTCTGCTTTT  |
|          |                                                              |
| template | GCCTTCCAGCGGAAAGTCCCCGGCAGGGTGCTGGAAGCGTCACCGTCCCCGCTTCTTTG  |
| query    | GCCTTCCAGCGGAAAGTCCCCGGCAGGGTGCTGGAAGCGTCACCGTCCCCGCTTCTTTG  |
|          |                                                              |
| template | TCACGACTGGCAATAAACACGCAGGGGGTTTCCGTGGTGACGGGCGTCTGGGCCAGGGTG |
| query    | TCACGACTGGCAATAAACACGCAGGGGGTTTCCGTGGTGACGGGCGTCTGGGCCAGGGTG |
|          |                                                              |
| template | ACTTTTTTATCATTGCTGTCTGTAACACGGGCGTCATGGCATCGTCCACCAAGTTCGTTA |
| query    | ACTTTTTTATCATTGCTGTCTGTAACACGGGCGTCATGGCATCGTCCACCAAGTTCGTTA |
|          |                                                              |
| template | CCATTGCGATCCGTGGAGTCGCCAAAGGAATCGGTGATCAGCAGATCCATCACACGCCG  |
| query    | CCATTGCGATCCGTGGAGTCGCCAAAGGAATCGGTGATCAGCAGATCCATCACACGCCG  |
|          |                                                              |
| template | TCTTCGCCATCGGCCAGCGCGCTGGCTTCATGGCTGTGATCGCTGCGATCGGTATCGGCA |
| query    | TCTTCGCCATCGGCCAGCGCGCTGGCTTCATGGCTGTGATCGCTGCGATCGGTATCGGCA |
|          |                                                              |
| template | ATGTTGTGACGATCAGCTCAATTTTGCATCCTGCTGGACGGTGATTTCCACCACGCCG   |
| query    | ATGTTGTGACGATCAGCTCAATTTTGCATCCTGCTGGACGGTGATTTCCACCACGCCG   |
|          |                                                              |
| template | GAGTTCGCTTATTGCCCTTTTCATCTTCCAGCGTCATGCGTACTTCCAGGTGTTACGG   |
| query    | GAGTTCGCTTATTGCCCTTTTCATCTTCCAGCGTCATGCGTACTTCCAGGTGTTACGG   |
|          |                                                              |
| template | GCGGTGCGCTGCTCTTCGGTATCGGCATTAACCCAGGCAGGAAGCACCAGATTCCAGCTG |
| query    | GCGGTGCGCTGCTCTTCGGTATCGGCATTAACCCAGGCAGGAAGCACCAGATTCCAGCTG |
|          |                                                              |
| template | TTATTGTTGCCCTTCGGTTAACGCATTAGCTTTTACCACCGGCATCACAGCGTACGGGCG |
| query    | TTATTGTTGCCCTTCGGTTAACGCATTAGCTTTTACCACCGGCATCACAGCGTACGGGCG |

|                   |                                                                                                                                  |
|-------------------|----------------------------------------------------------------------------------------------------------------------------------|
| template<br>query | GCGTTGTTTTTCGCCCTGCCAGGAGGCAGAAATAATTTTGTAAATGGTGGTTAATCAGCGCG<br>GCGTTGTTTTTCGCCCTGCCAGGAGGCAGAAATAATTTTGTAAATGGTGGTTAATCAGCGCG |
| template<br>query | TTGACAGTCCATTTGCACTTTTCCAGACCAACAGCGGCCTCAGGCGTATCTTCAATCACG<br>TTGACAGTCCATTTGCACTTTTCCAGACCAACAGCGGCCTCAGGCGTATCTTCAATCACG     |
| template<br>query | CATTCCGGGTGTTTCATTGGTGGCGTCAGCCTTCAGCCACAACGTGACGTCCAGCGGATCT<br>CATTCCGGGTGTTTCATTGGTGGCGTCAGCCTTCAGCCACAACGTGACGTCCAGCGGATCT   |
| template<br>query | TTCTCACGATATTCGAGAATGATGAAATTGTTACGATCGACAAAATCGGTGCGGCTGCC<br>TTCTCACGATATTCGAGAATGATGAAATTGTTACGATCGACAAAATCGGTGCGGCTGCC       |
| template<br>query | ATTAAGGAGTGCTGAATTTTAACGTTTTCCGGATCGAGCTGCGCCGCCAGCGGCGTGCCT<br>ATTAAGGAGTGCTGAATTTTAACGTTTTCCGGATCGAGCTGCGCCGCCAGCGGCGTGCCT     |
| template<br>query | ATCTGGTAGTTTCACGGTCGCGTTAACGCTAAAGTCGTTACTATCGCCAGTACCGGCTTTG<br>ATCTGGTAGTTTCACGGTCGCGTTAACGCTAAAGTCGTTACTATCGCCAGTACCGGCTTTG   |
| template<br>query | TAATCCGTACCAACCGTGACCAGCGGTACCGGCGTATATTCCAGCCCCAAAGTGACGGCA<br>TAATCCGTACCAACCGTGACCAGCGGTACCGGCGTATATTCCAGCCCCAAAGTGACGGCA     |
| template<br>query | TGAGGATCTTTTTGCAGATTATCGGTGCCAAACAGCGCTACTTCATCGCCGTAGTACTGT<br>TGAGGATCTTTTTGCAGATTATCGGTGCCAAACAGCGCTACTTCATCGCCGTAGTACTGT     |
| template<br>query | TCGTAAACTAATTTAGCGCCAAGCTGCGGATAAAACGGCAGCCAGCTTTCCATGCGGATA<br>TCGTAAACTAATTTAGCGCCAAGCTGCGGATAAAACGGCAGCCAGCTTTCCATGCGGATA     |
| template<br>query | TCCCAGCCGCGCGGGTCGTTCTTCATAAAAGTCGAAATCTTCGGAGTCTTTCAGTCA<br>TCCCAGCCGCGCGGGTCGTTCTTCATAAAAGTCGAAATCTTCGGAGTCTTTCAGTCA           |
| template<br>query | GAAAGAGGGTGGTAATAGTTGCCGGAGAATTTCAAGTAATCCGTCCAGGCTTCAGTTCCC<br>GAAAGAGGATGGTAATAGTTGCCGGAGAATTTCAAGTAATCCGTCCAGGCTTCAGTTCCC     |
| template<br>query | AGACCTAATCGACGGTGACCGCGCTAAAAATCGTAGTCATAGAATGCGTTGCCGCCAAGC<br>AGACCTAATCGACGGTGACCGCGCTAAAAATCGTAGTCATAGAATGCGTTGCCGCCAAGC     |
| template<br>query | AGCCAGTTGCCGACGTTCTGGCGAACGCCAAGCCCAAAGTTACCAATGGTGCGGTCTTCC<br>AGCCAGTTGCCGACGTTCTGGCGAACGCCAAGCCCAAAGTTACCAATGGTGCGGTCTTCC     |
| template<br>query | TTACGCTGAGCCGAAATCTGGCTAAAGAAAAGCGTGCTCTGGTTGTACACCAGGGAATA<br>TTACGCTGAGCCGAAATCTGGCTAAAGAAAAGCGTGCTCTGGTTGTACACCAGGGAATA       |
| template<br>query | AAATAATCCAGCGAACTGCCGTCCAGATCGCCGCCTTCGCCACGGACAGGCTGGTACGG<br>AAATAATCCAGCGAACTGCCGTCCAGATCGCCGCCTTCGCCACGGACAGGCTGGTACGG       |
| template<br>query | ATCTTGCCATAAGGTGACATTACACCTTCAAGATATGACTGTGCTGAGGAAGTGATTTGG<br>ATCTTGCCATAAGGTGACATTACACCTTCAAGATATGACTGTGCTGAGGAAGTGATTTGG     |
| template<br>query | TTTTGCAAATAGCTACGCGCCTGGGATTCCAGCGCTTCCGGGGTGAGATTATCAAAGCCC<br>TTTTGCAAATAGCTACGCGCCTGGGATTCCAGCGCTTCCGGGGTGAGATTATCAAAGCCC     |
| template<br>query | TGGGTGGCGGAATTAATAAAGTAGTCAGCGCCCTGTTCTTTAAAGGACTTTCCTTTATTT<br>TGGGTGGCGGAATTAATAAAGTAGTCAGCGCCCTGTTCTTTAAAGGACTTTCCTTTATTT     |
| template<br>query | TCCTGTTCTTCTTTTTTCGCGATTTCGCTGGCTAAATCAGGCAGGGAGGAGTGCGTTTCA<br>TCCTGTTCTTCTTTTTTCGCGATTTCGCTGGCTAAATCAGGCAGGGAGGAGTGCGTTTCA     |
| template<br>query | TCATTTGCAGATGCAGAGTTATCTGCGCCAGAAGCCGCAACTGAGACTCCAGACACTAAT<br>TCATTTGCAGATGCAGAGTTATCTGCGCCAGAAGCCGCAACTGAGACTCCAGACACTAAT     |
| template<br>query | AGCAAAACCAGAATGCGAATCCTTCGCACCATATGATATCCCTGTCGTTAAATAAAAAACG<br>AGCAAAACCAGAATGCGAATCCTTCGCACCATATGATATCCCTGTCGTTAAATAAAAAACG   |
| template<br>query | CCTCTATGAAAAGATATTATATGGATGATTCAGATGGAATCATAACTAACAGGCCTAAAT<br>CCTCTATGAAAAGATATTATATGGATGATTCAGATGGAATCATAACTAACAGGCCTAAAT     |
| template<br>query | ATATTCCTAAAAAGAAAAGTTTAATATGAAACAGATTTATAATATTGATATAATAAATAA<br>ATATTCCTAAAAAGAAAAGTTTAATATGAAACAGATTTATAATATTGATATAATAAATAA     |
| template          | AAAGAAAGCTGTATTATTTCTAATA-TAATTTTCGGGAATAATATCCCTATAAATAG                                                                        |

|          |                                                               |
|----------|---------------------------------------------------------------|
| query    | AAAGAAAGCTGTTATTATTCTAATAATAATTTTCGGGAATAATATCCCTATAAAATAG    |
| template | TTGAATCAATAAAAAGAATAAAATAACCGCCGGGCAGGATACTATGCTGATATTACGGGA  |
| query    | TTGAATCAATAAAAAGAATAAAATAACCGCCGGGCAGGATACTATGCTGATATTACGGGA  |
| template | GATATCGAATAACGCTTTTGCCCTTAGCCGGATAAGACGTCGGCGCCTCTGCTCTGCGGCG |
| query    | GATATCGAATAACGCTTTTGCCCTTAGCCGGATAAGACGTCGGCGCCTCTGCTCTGCGGCG |
| template | CAACGTCGACAGCGGTTTTATTGATCGGAAATGACGAAATTAACCCGTTTTTTTGAAATT  |
| query    | CAACGTCGACAGCGGTTTTATTGATCGGAAATGACGAAATTAACCCGTTTTTTTGAAATT  |
| template | AAACCATGACCGTTCTGGCAAAAATAGTCCACTGCGCCGAGGCTTTCAAAACCTGTAAC   |
| query    | AAACCATGACCGTTCTGGCAAAAATAGTCCACTGCGCCGAGGCTTTCAAAACCTGTAAC   |
| template | GGCTGGCGGCAGTCAGGACAAAGTGCCTGTAAACGAGAAATCTTTAGCGCATGTCTCGCAA |
| query    | GGCTGGCGGCAGTCAGGACAAAGTGCCTGTAAACGAGAAATCTTTAGCGCATGTCTCGCAA |
| template | TGCGCTGTATCGCCATTGCGCTCCAGCGCGTGATGGCAAACGGGGCAGGTTATTTCATA   |
| query    | TGCGCTGTATCGCCATTGCGCTCCAGCGCGTGATGGCAAACGGGGCAGGTTATTTCATA   |
| template | ACATTCTCCTCAGGCGCGTGACTTACTTTTACTTGAAAGGCCTGATAGCGCAGCGCTTGT  |
| query    | ACATTCTCCTCAGGCGCGTGACTTACTTTTACTTGAAAGGCCTGATAGCGCAGCGCTTGT  |
| template | CAGGCCTGGAATATTACTGAAAAAGCATTACTTGCTTTTCTTGATATGTTTCATCAGACG  |
| query    | CAGGCCTGGAATATTACTGAAAAAGCATTACTTGCTTTTCTTGATATGTTTCATCAGACG  |
| template | CTTACGTTTGCGCATTTGCGTTGGCGTCAGTGTTACGCTTGTTTCGCATACGGGTTCTC   |
| query    | CTTACGTTTGCGCATTTGCGTTGGCGTCAGTGTTACGCTTGTTTCGCATACGGGTTCTC   |
| template | CCCTTCTTTAAACTGAATGCGAATCGGCGTCCCCATCACTTCCAACGACTTGCGGAAGTA  |
| query    | CCCTTCTTTAAACTGAATGCGAATCGGCGTCCCCATCACTTCCAACGACTTGCGGAAGTA  |
| template | GTTTCATCAGATAGCGCTTATAGGAGTCTGGCAGATCTTTTACCTGGTTGCCGTGAATCAC |
| query    | GTTTCATCAGATAGCGCTTATAGGAGTCTGGCAGATCTTTTACCTGGTTGCCGTGAATCAC |
| template | CACAATCGGCGGGTTATAGCCGCCAGCGTGGGCATATTTTCAGTTTTACACGGCGACCACG |
| query    | CACAATCGGCGGGTTATAGCCGCCAGCGTGGGCATATTTTCAGTTTTACACGGCGACCACG |
| template | CACCAGCGGGCGGTGATGATCTTCCACCGCCATCGTCATGATACGGGTCAGCATCGCAGT  |
| query    | CACCAGCGGGCGGTGATGATCTTCCACCGCCATCGTCATGATACGGGTCAGCATCGCAGT  |
| template | GCTCACCCGGCGAGTGGAACGTGTCGTAAGCCTCGCGTACGGACTCAAACAGGTTGCCGAC |
| query    | GCTCACCCGGCGAGTGGAACGTGTCGTAAGCCTCGCGTACGGACTCAAACAGGTTGCCGAC |
| template | GCCGCTGCCGTGTAGCGCAGAGATAAAATGGACGCGGGCAAATCAATAAAGCCAGACG    |
| query    | GCCGCTGCCGTGTAGCGCAGAGATAAAATGGACGCGGGCAAATCAATAAAGCCAGACG    |
| template | GAAATCCAGCGTCTCTTTACCTGCTCTTTGACTTCCTGGCTCAGGCCATCCCATTGTGTT  |
| query    | GAAATCCAGCGTCTCTTTACCTGCTCTTTGACTTCCTGGCTCAGGCCATCCCATTGTGTT  |
| template | GACTACGATAACGAGTGAGCGCCCACTATTGAGGATAAAGCCAGCAGAGACAAATCCTG   |
| query    | GACTACGATAACGAGTGAGCGCCCACTATTGAGGATAAAGCCAGCAGAGACAAATCCTG   |
| template | GTCGGAGATCCCCTCGCGGCATCGATAACCAACAGTACGACGTTAGCGTCTTCAATCGC   |
| query    | GTCGGAGATCCCCTCGCGGCATCGATAACCAACAGTACGACGTTAGCGTCTTCAATCGC   |
| template | CTGCAACGTTTTAATCACCAGAACTTTTCTACCGCATCGGTGATTTTTCCGCGCTTACG   |
| query    | CTGCAACGTTTTAATCACCAGAACTTTTCTACCGCATCGGTGATTTTTCCGCGCTTACG   |
| template | CACCCCGCCGTGTCAATCAGCACATATTCCCGTTCGTGCGGTTCCATCGGGATATAAAT   |
| query    | CACCCCGCCGTGTCAATCAGCACATATTCCCGTTCGTGCGGTTCCATCGGGATATAAAT   |
| template | GCTGTGCGGAGTGGTGCCCGCATGTCGTATACCACCAAGCGCTCTTAACCGAG         |
| query    | GCTGTGCGGAGTGGTGCCCGCATGTCGTATACCACCAAGCGCTCTTAACCGAG         |

**Not\_named\_JQ071613**

|          |                                                              |
|----------|--------------------------------------------------------------|
| template | ATGCGGCGCTCTTTTGTTATCAGTGGTGTACTGGATGAATCTCATCAACGCATTTTGCAA |
|----------|--------------------------------------------------------------|

|          |                                                              |
|----------|--------------------------------------------------------------|
| query    | ATGCGGCGCTCTTTTGTTATCAGTGGTGTACTGGATGAATCTCATCAACGCATTTTGCAA |
| template | GAAACGTTAGCAGCATTAAAGAAAAAGGATCCCGCTCTTTCTTTAATTTATCAGGATATT |
| query    | GAAACGTTAGCAGCATTAAAGAAAAAGGATCCCGCTCTTTCTTTAATTTATCAGGATATT |
| template | GCGCCTTCCCATGATGAAAGCAAGTATCTGCCTGCGCCAGTGGCTGGCTTTGTACAGAGT |
| query    | GCGCCTTCCCATGATGAAAGCAAGTATCTGCCTGCGCCAGTGGCTGGCTTTGTACAGAGT |
| template | CGCCATGGTAATTACTTATTACTGACGAATAAAGAGCGTTTACGTGTAGGGGCATTGTTA |
| query    | CGCCATGGTAATTACTTATTACTGACGAATAAAGAGCGTTTACGTGTAGGGGCATTGTTA |
| template | CCCAATGGGGGAGAAATTGTCCATCTGAGTGCCGATGTGGTAACGATTAACATTATGAT  |
| query    | CCCAATGGGGGAGAAATTGTCCATCTGAGTGCCGATGTGGTAACGATTAACATTATGAT  |
| template | ACTTTGATTAACATCCATTAGATTTTAAG                                |
| query    | ACTTTGATTAACATCCATTAGATTTTAAG                                |

***SPI-1\_AF148689***

|          |                                                                |
|----------|----------------------------------------------------------------|
| template | ACCCCCATTGCTGGCGATTTGTGATAAGGTATGGTGTATATATCAGCAAATAATGCAGAA   |
| query    | ACCCCCATTGCTGGCGATTTGTGATAAGGTATGGTGTATATATCAGCAAATAATGCAGAA   |
| template | AATGCACCATGCCAGTGTGCTATCTTATTGATGTATATGGATTATTAAGATGTCTGCCA    |
| query    | AATGCACCATGCCAGTGTGCTATCTTATTGATGTATATGGATTATTAAGATGTCTGCCA    |
| template | GCCGTTTTATTCTGAAATGATTATATTAATATTGAAGCTTTCATTACAAAATTGTGCAT    |
| query    | GCCGTTTTATTCTGAAATGATTATATTAATATTGAAGCTTTCATTACAAAATTGTGCAT    |
| template | AAAGTTTGTAAGGGTATCTTTTTGTGACGAAATGAACGCGCGTTGGAATGTAATTATTGG   |
| query    | AAAGTTTGTAAGGGTATCTTTTTGTGACGAAATGAACGCGCGTTGGAATGTAATTATTGG   |
| template | CTATAATAATAAAAAAATCGGATTTAAATCATCTCTGTGAGTTTTAATTATTGTTTATA    |
| query    | CTATAATAATAAAAAAATCGGATTTAAATCATCTCTGTGAGTTTTAATTATTGTTTATA    |
| template | AGAATATAACGATTTTGAGTTCCTTAGCACACAGGATAAAATATGGTATTGCCTTCAA     |
| query    | AGAATATAACGATTTTGAGTTCCTTAGCACACAGGATAAAATATGGTATTGCCTTCAA     |
| template | TGAATAAATCAGTTGAGGCCATTAGCAATAATCACCTTCAACAGCCGAACAAATTTCCAT   |
| query    | TGAATAAATCAGTTGAGGCCATTAGCAATAATCACCTTCAACAGCCGAACAAATTTCCAT   |
| template | TAATAAATGGATTAGCTGACGTAAGAGACTATTATGTGCAAACTGCTTATTGTTTAAAC    |
| query    | TAATAAATGGATTAGCTGACGTAAGAGACTATTATGTGCAAACTGCTTATTGTTTAAAC    |
| template | TTAATAAAGGCAGTTTGCGAATTGAAAACGAATTTGGGGAGTTCATCGAACGATCTGCGC   |
| query    | TTAATAAAGGCAGTTTGCGAATTGAAAACGAATTTGGGGAGTTCATCGAACGATCTGCGC   |
| template | CGTGTTTATTTTTATTGGAAAAAGATCAAACAATCACGCTTAGTATGAGCGAAATAGAAG   |
| query    | CGTGTTTATTTTTATTGGAAAAAGATCAAACAATCACGCTTAGTATGAGCGAAATAGAAG   |
| template | GGCATATTGATTTTTCTTCACTGGAAGTTTCCTATGACTTAATGCAAAAATTCACAAAG    |
| query    | GGCATATTGATTTTTCTTCACTGGAAGTTTCCTATGACTTAATGCAAAAATTCACAAAG    |
| template | TTTTTTACAGTACAAGAACTATAATGATCGAGAGCTATCATTAAAAACGAAACCAAAGT    |
| query    | TTTTTTACAGTACAAGAACTATAATGATCGAGAGCTATCATTAAAAACGAAACCAAAGT    |
| template | ATTTTTTTCATGCGGACTTGTGGCCAGGGATGAGTGATACTTTTGACTCTATTTTGCATG   |
| query    | ATTTTTTTCATGCGGACTTGTGGCCAGGGATGAGTGATACTTTTGACTCTATTTTGCATG   |
| template | GTGTGGCATGTCCACGGGTTTGTAGTAATGTGAGTATTGATGATCATGATTATTCATATT   |
| query    | GTGTGGCATGTCCACGGGTTTGTAGTAATGTGAGTATTGATGATCATGATTATTCATATT   |
| template | TCTCATTGATGTATCTTATATCGGCATTTGTACGTAAGCCCGGTGGGTTTGATTTCCTTG   |
| query    | TCTCATTGATGTATCTTATATCGGCATTTGTACGTAAGCCCGGTGGGTTTGATTTCCTTG   |
| template | AGCGAGCAATAAAAAATTACGACAAAAGAGAAAAGTTTATAACATTATTATCAGCGATCTCA |
| query    | AGCGAGCAATAAAAAATTACGACAAAAGAGAAAAGTTTATAACATTATTATCAGCGATCTCA |
| template | CCCACAAATGGTCACAGGCTGAGGTGGCAGGAAAGCTGTTTATGAGCGTATCAAGTCTGA   |



|          |                                                                  |
|----------|------------------------------------------------------------------|
| query    | CCCGCAAATGGTCACAGGCTGAGGTGGCAGGAAAGCTGTTTATGAGCGTATCAAGTCTGA     |
| template | AGCGAAAACCTGGCCGCTGAAGAGGTTGAGTTTTAGTAAAATATACCTGGATGCTCGTATGA   |
| query    | AGCGAAAACCTGGCCGCTGAAGAGGTTGAGTTTTAGTAAAATATACCTGGATGCTCGTATGA   |
| template | ATCAGGCTATAAAATTATTACGTATGGGGGCTGGAAATATTTTACAAGTCGCGACGATGT     |
| query    | ATCAGGCTATAAAATTATTACGTATGGGGGCTGGAAATATTTTACAAGTCGCGACGATGT     |
| template | GTGGCTATGATACGCCTTCTTATTTTATCGCTATTTTTAAACGGCATTTTAAGATTACAC     |
| query    | GTGGCTATGATACGCCTTCTTATTTTATCGCTATTTTTAAACGGCATTTTAAGATTACAC     |
| template | CGCTTAGCTTTATGCGTACAATGAACCATTTGATTTGTGAAATATTTTAAACGTTACTAT     |
| query    | CGCTTAGCTTTATGCGTACAATGAACCATTTGATTTGTGAAATATTTTAAACGTTACTAT     |
| template | CTGTTTGC GTTACAGATACCAAATATTTTTTAAATCGTAGTGTATATTTCAGTATCGCTA    |
| query    | CTGTTTGC GTTACAGATACCAAATATTTTTTAAATCGTAGTGTATATTTCAGTATCGCTA    |
| template | CACCAGTGATGTAGTTAATGAAAGGGAATCGAAAGCGTTCATTGTCAGACATACATGG       |
| query    | CACCAGTGATGTAGTTAATGAAAGGGAATCGAAAGCGTTCATTGTCAGACATACATGG       |
| template | CCACCAGGCGCCGGGCAATCGTTGTA CTCTAAGAGATTACAGTAAAGTAAAACAGCAAAT    |
| query    | CCACCAGGCGCCGGGCAATCGTTGTA CTCTAAGAGATTACAGTAAAGTAAAACAGCAAAT    |
| template | TTAATCATTATCAGATTTGTAAAAGGAATTCATTTTCGGTAACGACATTGCGCATGTAATA    |
| query    | TTAATCATTATCAGATTTGTAAAAGGAATTCATTTTCGGTAACGACATTGCGCATGTAATA    |
| template | ACGTATCTGGTCTTATTACCTTTGTAGTAAGAAGGCGTTATCTACTTGCGCAGTAGTCGC     |
| query    | ACGTATCTGGTCTTATTACCTTTGTAGTAAGAAGGCGTTATCTACTTGCGCAGTAGTCGC     |
| template | CCAGGAAGAAAAATCATTACCGAAGCTGTGGTCAGTTTTCAAAAAAGGATAAATAAATGA     |
| query    | CCAGGAAGAAAAATCATTACCGAAGCTGTGGTCAGTTTTCAAAAAAGGATAAATAAATGA     |
| template | GAAATGTAATTATATACGGTATTAAC TGGACTAATTGTTATGCCCTACAGTCTATTTTTA    |
| query    | GAAATGTAATTATATACGGTATTAAC TGGACTAATTGTTATGCCCTACAGTCTATTTTTA    |
| template | AGCAAAAATATCCGGAAAAGTGC GTTAAAACGTGTAAC TCATTAAC TGCAC TTTTGCATT |
| query    | AGCAAAAATATCCGGAAAAGTGC GTTAAAACGTGTAAC TCATTAAC TGCAC TTTTGCATT |
| template | CCCTATCCGATATGCCGACGCCGGGCTGATTTTAGCTTTGAACCCGATGAGCATGTTT       |
| query    | CCCTATCCGATATGCCGACGCCGGGCTGATTTTAGCTTTGAACCCGATGAGCATGTTT       |
| template | ATCTTTTTCATGCGTTGCTGACGCGGTTGCAGAACCGTAAAGTTTTGGTAGTGGCAGATC     |
| query    | ATCTTTTTCATGCGTTGCTGACGCGGTTGCAGAACCGTAAAGTTTTGGTAGTGGCAGATC     |
| template | GCTTGTATTATATCGATCGCTGTGTGCTGCAATATTTTGGCGTTATGGATTATGTTTTAA     |
| query    | GCTTGTATTATATCGATCGCTGTGTGCTGCAATATTTTGGCGTTATGGATTATGTTTTAA     |
| template | AAGACGAAC TATCCTGCGCTATCCGCTCGGAGCGAGAGAAGCTCCGTCTTCCGGAAGCCT    |
| query    | AAGACGAAC TATCCTGCGCTATCCGCTCGGAGCGAGAGAAGCTCCGTCTTCCGGAAGCCT    |
| template | GGCTGCGTTTCTGCCACAGGCCACAAAAGAAAACCGTGGCTGCTACGTATGCTTTTAATG     |
| query    | GGCTGCGTTTCTGCCACAGGCCACAAAAGAAAACCGTGGCTGCTACGTATGCTTTTAATG     |
| template | CCGGCGAGACGCCGGAAGAGGTATTGTTTAATATCAATCAATACGCCTGGTGGAATCTAC     |
| query    | CCGGCGAGACGCCGGAAGAGGTATTGTTTAATATCAATCAATACGCCTGGTGGAATCTAC     |
| template | CTCCCGGTGTACG CAGGCGAAATATGCGCTGCTGATATTATTATCCTCCGGACATCCGG     |
| query    | CTCCCGGTGTACG CAGGCGAAATATGCGCTGCTGATATTATTATCCTCCGGACATCCGG     |
| template | CAATTGAACTGGCGAAAAAATTTGGTCTGGGAACAAAAACCGTCAGTATTTATCGTAAGA     |
| query    | CAATTGAACTGGCGAAAAAATTTGGTCTGGGAACAAAAACCGTCAGTATTTATCGTAAGA     |
| template | AGGTTATGTATCGTTTGGGGATGGACTCTTCACCGCTATCGCTGTTCCGGGGACTGAAAC     |
| query    | AGGTTATGTATCGTTTGGGGATGGACTCTTCACCGCTATCGCTGTTCCGGGGACTGAAAC     |
| template | TAGACGCGCATTTACAGCGCACTGCTTTTGCACATAACCCTGCTGTACCTGACGATAATT     |
| query    | TAGACGCGCATTTACAGCGCACTGCTTTTGCACATAACCCTGCTGTACCTGACGATAATT     |
| template | GCGCGTTACCGATTGCGGTAGGAATGAATTAATAATTTTTATCATTATGACCATGTG        |
| query    | GCGCGTTACCGATTGCGGTAGGAATGAATTAATAATTTTTATCATTATGACCATGTG        |

|          |                                                               |
|----------|---------------------------------------------------------------|
| template | TTGAGCTTTTATTATAAAAAAGATTTTTTGGAGTAGTAATTCCTATATATAATCATCCGGA |
| query    | TTGAGCTTTTATTATAAAAAAGATTTTTTGGAGTAGTAATTCCTATATATAATCATCCGGA |
| template | GGTGGTTGGTAGCCTGGCTCAATCATTGAGGCATATTTTGCAGGCAATATATTGAATCT   |
| query    | GGTGGTTGGTAGCCTGGCTCAATCATTGAGGCATATTTTGCAGGCAATATATTGAATCT   |
| template | GAAAAGTTAAAGATGATATTTTCGGTGCAGGAGCTATCATGTGGAGGGAAAAGTATGCTA  |
| query    | GAAAAGTTAAAGATGATATTTTCGGTGCAGGAGCTATCATGTGGAGGGAAAAGTATGCTA  |
| template | AGTCCTACGACTCGTAATATGGGGGCGAGTTTATCGCCTCAGCCTGACGTACGCGGGGAG  |
| query    | AGTCCTACGACTCGTAATATGGGGGCGAGTTTATCGCCTCAGCCTGACGTACGCGGGGAG  |
| template | CTAAACACCGAAGCATTGACCTGTATTGTTGAGCGTCTGGAAAGTGAAATTATAGATGGC  |
| query    | CTAAACACCGAAGCATTGACCTGTATTGTTGAGCGTCTGGAAAGTGAAATTATAGATGGC  |
| template | AGCTG                                                         |
| query    | AGCTG                                                         |

### ***SPI-1\_AY956822***

|          |                                                              |
|----------|--------------------------------------------------------------|
| template | GGCTCAAGGGGCGCTCATTTCAGTACGGGGCGGAAGGTTATATCAAAATGAGCCAGGCC  |
| query    | GGCTCAAGGGGCGCTCATTTCAGTACGGGGCGGAAGGTTATATCAAAATGAGCCAGGCC  |
| template | ATTGGTATTTCCCAAGCCACTTTAATTTAACGTAAATAAGGAAGTCATTATGGCAACAC  |
| query    | ATTGGTATTTCCCAAGCCACTTTAATTTAACGTAAATAAGGAAGTCATTATGGCAACAC  |
| template | CTTGGTCAGGCTATCTGGATGACGTCTCAGCAAAATTTGATACGGGCGTTGATAATCTAC |
| query    | CTTGGTCAGGCTATCTGGATGACGTCTCAGCAAAATTTGATACGGGCGTTGATAATCTAC |
| template | AAACGCAGGTAACAGAGGCGCTGGATAAATTAGCAGCAAAACCTCCGATCCGGCGCTAC  |
| query    | AAACGCAGGTAACAGAGGCGCTGGATAAATTAGCAGCAAAACCTCCGATCCGGCGCTAC  |
| template | TGGCGGCGTATCAGAGTAAGCTCTCGGAATATAACTTGACCGTAACGCGCAATCGAACA  |
| query    | TGGCGGCGTATCAGAGTAAGCTCTCGGAATATAACTTGACCGTAACGCGCAATCGAACA  |
| template | CGGTAAAAGTCTTTAAGGATATTGATGCTGCCATTATTCAGAACTTCCGTTAATCAGTTA |
| query    | CGGTAAAAGTCTTTAAGNATATTGATGCTGCCATTATTCAGAACTTCCGTTAATCAGTTA |
| template | TAAGGTGGATTATGTCGATTGCAACTATTGTCCCTGAGAATGCCGTTATAGGGCAGGCGG |
| query    | TAAGGTGGATTATGTCGATTGCAACTATTGTCCCTGAGAATGCCGTTATAGGGCAGGCGG |
| template | TCAATATCAGGTCTATGGAA                                         |
| query    | TCAATATCAGGTCTATGGAA                                         |

### ***SPI-1\_AY956823***

|          |                                                               |
|----------|---------------------------------------------------------------|
| template | CGCTTGAAGAGGTCAATGGCCACATGGATTTTCGATATACTCGAGATACCGACGCAACGAC |
| query    | CGCTTGAAGAGGTCAATGGCCACATGGATTTTCGATATACTCGAGATACCGACGCAACGAC |
| template | TTGGCGCTCTCTATGCACTTATCCCAAACGAGCAGCAAAACAAAATGGCGGTACCCACAG  |
| query    | TTGGCGCTCTCTATGCACTTATCCCAAACGAGCAGCAAAACAAAATGGCGGTACCCACAG  |
| template | AGAAAGCGCAGAAGATCTTCTATACGCCTGACTTTCCTGCCAGAAGAGAGGTATTGAAAC  |
| query    | AGAAAGCGCAGAAGATCTTCTATACGCCTGACTTTCCTGCCAGAAGAGAGGTATTGAAAC  |
| template | ATCTGAAAACGGCGTTCTCCTGTACGAAGGATACAAGCAAAGGTTGCAGTAACTGTAACA  |
| query    | ATCTGAAAACGGCGTTCTCCTGTACGAAGGATACAAGCAAAGGTTGCAGTAACTGTAACA  |
| template | ACAAAAGTTGTATTGAAAATGAAGAGTTAATTCCTTATTTTCTGCTGTTCTGCTTACTG   |
| query    | ACAAAAGTTGTATTGAAAATGAAGAGTTAATTCCTTATTTTCTGCTGTTCTGCTTACTG   |
| template | CTTTTCTCCGACTCCCGGAGAGTTATGAGATCATCCTTAGCTCGGCTCAGATAACGTTAA  |
| query    | CTTTTCTCCGACTCCCGGAGAGTTATGAGATCATCCTTAGCTCGGCTCAGATAACGTTAA  |
| template | AGGAGCGCGTTTACAACATTATATCTTCGTACCCAGTAGACAGTGGAAGCTTACGGATG   |

query AGGAGCGCGTTTACAACATTATATCTTCGTCACCAGTAGACAGTGGAAGCTTACGGATG

template TTGCCGATCA

query TTGCCGATCA

### SPI-1\_AY956824

template TTTCCAAAATGGGAGGCTGGTTATTACCAGGTAAGGACGGTAATACCGTTAAGCTAGATG

query TTTCCAAAATGGGAGGCTGGTTATTACCAGGTAAGGACGGTAATACCGTTAAGCTAGATG

template TTACCTCACTCAAAAATGATTTAAACAGTTTAGTCAATAAATATAATCAAATAAACAGTA

query TTACCTCACTCAAAAATGATTTAAACAGTTTAGTCAATAAATATAATCAAATAAACAGTA

template ATACCGTTTTATTTCCAGCGCAGTCAGGCAGCGGCGTTAAAGTAGCCACTGAAGCGGAAG

query ATACCGTTTTATTTCCAGCGCAGTCAGGCAGCGGCGTTAAAGTAGCCACTGAAGCGGAAG

template CGAGACAGTGGCTCAGTGAATTGAATTTACCGAATAGCTGCCTGAAATCTTATGGATCCG

query CGAGACAGTGGCTCAGTGAATTGAATTTACCGAATAGCTGCCTGAAATCTTATGGATCCG

template GTTATGTCGTACCGTTGATCTGACGCCATTACAAAAATGGTTCAAGGATATTGATGGTT

query GTTATGTCGTACCGTTGATCTGACGCCATTACAAAAATGGTTCAAGGATATTGATGGTT

template TAGGCGCGCCGGGAAAAGACTCAAACTCGAAATGGATAACGCCAAATATCAAGCTTGGC

query TAGGCGCGCCGGGAAAAGACTCAAACTCGAAATGGATAACGCCAAATATCAAGCTTGGC

template AGTCGGGTTTTAAAGCGCAGGAAGAAAATATGAAAACCACATTACAGACGCTGACGCAA

query AGTCGGGTTTTAAAGCGCAGGAAGAAAATATGAAAACCACATTACAGACGCTGACGCAA

template AATATAGCAATGCCAATTCATTGTACGACAACC TGGTAAAAGTGCTGAGC

query AATATAGCAATGCCAATTCATTGTACGACAACC TGGTAAAAGTGCTGAGC

### SPI-1\_AY956825

template GTCTGGCGGTGACGCTGGCGCGCAACGTCAATGAATATTTTCGGTATTCAGGAAACAAAAC

query GTCTGGCGGTGACGCTGGCGCGCAACGTCAATGAATATTTTCGGTATTCAGGAAACAAAAC

template ATATGCTGGACCAACTGGAAGCGAAATTTCTGATTACTTAAAGAAGTGCTCAGACATG

query ATATGCTGGACCAACTGGAAGCGAAATTTCTGATTACTTAAAGAAGTGCTCAGACATG

template CCACGGTACAACGTATATCTGAAGTTTTGCAGCGTTTATTAAAGCGAACGTGTTTCCGTGC

query CCACGGTACAACGTATATCTGAAGTTTTGCAGCGTTTATTAAAGCGAACGTGTTTCCGTGC

template GTAATATGAATTAATTATGGAAGCGCTCGCATTGTGGGCGCCAAGAGAAAAAGATGTCA

query GTAATATGAATTAATTATGGAAGCGCTCGCATTGTGGGCGCCAAGAGAAAAAGATGTCA

template TTAACCTTGTAGAGCATATTCGTGGAGCAATGGCGCGTTATTTGTGCATAAATTCGCCA

query TTAACCTTGTGAGAGCATATTCGTGGAGCAATGGCGCGTTATTTGTGCATAAATTCGCCA

template ATGGCGGCGAATTACGAGCAGTAATGGTATCTGCTGAAGTTGAGGATGTTATTCGCAAAG

query ATGGCGGCGAATTACGAGCAGTAATGGTATCTGCTGAAGTTGAGGATGTTATTCGCAAAG

template GGATCCGTCAGACCTCTGGCAGTACCTTCCTCAGCCTTGACCCGGAAGCCTCCGC

query GGATCCGTCAGACCTCTGGCAGTACCTTCCTCAGCCTTGACCCGGAAGCCTCCGC

### SPI-1\_JN982040

template TTCGTTATGGCGTAGCCTGGCGGTGGGCTTTGTTGTCTTCTCTATTGTCAACCGTGGT

query TTCGTTATGGCGTAGCCTGGCGGTGGGCTTTGTTGTCTTCTCTATTGTCAACCGTGGT

template CAGTTTATCGTTATTACCAAAGGTTCAGAACGTGTCGCGGAAGTCGCGGCCGATTTTCT

query CAGTTTATCGTTATTACCAAAGGTTCAGAACGTGTCGCGGAAGTCGCGGCCGATTTTCT

template CTGGATGGTATGCCCGGTAACAGATGAGTATTGATGCCGATTTGAAGGCCGGTATTATT

query CTGGATGGTATGCCCGGTAACAGATGAGTATTGATGCCGATTTGAAGGCCGGTATTATT

|          |                                                            |
|----------|------------------------------------------------------------|
| template | GATGCGGATGCCGCGCGCAACGGCGAAGCGTACTGGAAAGGGAAGCCAGCTTTACGGT |
| query    | GATGCGGATGCCGCGCGCAACGGCGAAGCGTACTGGAAAGGGAAGCCAGCTTTACGGT |
| template | TCCTTTGACGGTGCGATGA                                        |
| query    | TCCTTTGACGGTGCGATGA                                        |

***SPI-1\_U16303***

|          |                                                               |
|----------|---------------------------------------------------------------|
| template | GTTTCGGAAGCATCCGTTTCCCTCTTAATTTTGTTGAAATTTCTCTTTGTTGCGAGCATGG |
| query    | GTTTCGGAAGCATCCGTTTCCCTCTTAATTTTGTTGAAATTTCTCTTTGTTGCGAGCATGG |
| template | TCTGAACTAATTGCCTGGCAGCTTGCCTTGTTTCGTCAATATTTGGAAAATCGAACACAT  |
| query    | TCTGAACTAATTGCCTGGCAGCTTGCCTTGTTTCGTCAATATTTGGAAAATCGAACACAT  |
| template | TTCCAACTTTTACTTTCAAGACAGAACTTGGCTTCTACCCCTCACTGACATTACGATCTG  |
| query    | TTCCAACTTTTACTTTCAAGACAGAACTTGGCTTCTACCCCTCACTGACATTACGATCTG  |
| template | ACGAGGCTACTCTTCGCTGGATTACGTAGGTTTTTTTCGTCAAACCTGGCTTTTACCCCGA |
| query    | ACGAGGCTACTCTTCGCTGGATTACGTAGGTTTTTTTCGTCAAACCTGGCTTTTACCCCGA |
| template | AACCAGCAGGAGCTTCTCTGTGGTCATCGAAAACAGGTAGAGTTTTTGAGCTGGGTTAG   |
| query    | AACCAGCAGGAGCTTCTCTGTGGTCATCGAAAACAGGTAGAGTTTTTGAGCTGGGTTAG   |
| template | CTTCGAAAACGAATTTTTCCAGAGCGACTGAGTGCAGGCTTAACATTGATACTTAACCTG  |
| query    | CTTCGAAAACG-ATTTTTCAGAGCGACTGAGTGCAGGCTTAACATTGATACTTAACCTG   |
| template | TTGAT-ATGAAAGGCTGGCTGAGAGTTGTTTTCAAACATCACCC-TGTTGTAGT-CAAG   |
| query    | TTGATAATGAAAGGCTGGCTGAGAGTTGTTTTCAAAGTATCACCCCTGTTGTAGTCCAGG  |
| template | -ATGATGAG-ATGTAA-CTGTCACA-TTTAGGCTACAGGTGAGCTACAAATTTATGGGTT  |
| query    | AATGATGAGAATGTAACTGTCACA-TTTAGGCTACAGGTGAGCTACAAATTTATGGGTT   |
| template | TATGTGAGTTTATAAGGGTTTTACCTGGGGCCACATGAGCACTTGAAAGAATAAAAAAC   |
| query    | TATGTGAGTTTATAAGGGTTTTACCTGGGGCCACATGAGCACTTGAAAGAATAAAAAAC   |
| template | GAGTAAAATCAATATGAATGAGTCATTTGATAAGGACTTCTCCAACCAACCCCGATGAT   |
| query    | GAGTAAAATCAATATGAATGAGTCATTTGATAAGGACTTCTCCAACCAACCCCGATGAT   |
| template | GCAGCAGTATCTCAAGCTGAAAGCCCAGCATCCGGAGATCCTGCTCTTTTATCGTATGGG  |
| query    | GCAGCAGTATCTCAAGCTGAAAGCCCAGCATCCGGAGATCCTGCTCTTTTATCGTATGGG  |
| template | AGACTTTTACGAGCTGTTTTATGACGACGCAAAGCGTGCCTCGCAGTTGCTCGATATTTT  |
| query    | AGACTTTTACGAGCTGTTTTATGACGACGCAAAGCGTGCCTCGCAGTTGCTCGATATTTT  |
| template | GCTGACCAAACGCGGCGCATCGGCTGGCGAACCTATCCCTATGGCGGGTATCCCGACCA   |
| query    | GCTGACCAAACGCGGCGCATCGGCTGGCGAACCTATCCCTATGGCGGGTATCCCGACCA   |
| template | CGCCGTAGAAAACACCTCGCGAAACTGGTCAATCAGGGCGAATCCGTCGCTATTTGCGA   |
| query    | CGCCGTAGAAAACACCTCGCGAAACTGGTCAATCAGGGCGAATCCGTCGCTATTTGCGA   |
| template | ACAGATTGGCGATCCGGCCACCAGCAAAGGTCCC GTTGAACGTAAGGTCGTGCGTATCGT |
| query    | ACAGATTGGCGATCCGGCCACCAGCAAAGGTCCC GTTGAACGTAAGGTCGTGCGTATCGT |
| template | TACGCCTGGCACTATCAGCGATGAAGCCCTGTTACAGGAGCGTCAGGATAACCTGCTGGC  |
| query    | TACGCCTGGCACTATCAGCGATGAAGCCCTGTTACAGGAGCGTCAGGATAACCTGCTGGC  |
| template | GGCTATCTGGCAGGATGGTAAAGGTTACGGTTACGCCACGCTGGATATCAGCTCCGGGCG  |
| query    | GGCTATCTGGCAGGATGGTAAAGGTTACGGTTACGCCACGCTGGATATCAGCTCCGGGCG  |
| template | CTTTCTGCTGAGCGAACC CGCGACCGTGAAACGATGGCCGAGAGCTGCAGCGCACCAA   |
| query    | CTTTCTGCTGAGCGAACC CGCGACCGTGAAACGATGGCCGAGAGCTGCAGCGCACCAA   |
| template | TCCCGCCGAAC TGTTGTATGCCGAAGATTTTGCTGAAATGGCGTTAATAGAGGGACGCCG |
| query    | TCCCGCCGAAC TGTTGTATGCCGAAGATTTTGCTGAAATGGCGTTAATAGAGGGACGCCG |
| template | GGGTCTGCGCCGTGCGCCGTTGTGGGAGTTTGAGATTGATACCGCCGCCAGCAGTTAAA   |
| query    | GGGTCTGCGCCGTGCGCCGTTGTGGGAGTTTGAGATTGATACCGCCGCCAGCAGTTAAA   |

|          |                                                                |
|----------|----------------------------------------------------------------|
| template | TCTGCAGTTCGGTACGCGGGATCTGGTCGGTTTCGGCGTCGAAAAATGCCTCGCGTGGATT  |
| query    | TCTGCAGTTCGGTACGCGGGATCTGGTCGGTTTCGGCGTCGAAAAATGCCTCGCGTGGATT  |
| template | ATGTGCGGCAGGCTGCCTGTTACAGTACGTAAAAGATACCCAGCGCACCTCCCTGCCGCA   |
| query    | ATGTGCGGCAGGCTGCCTGTTACAGTACGTAAAAGATACCCAGCGCACCTCCCTGCCGCA   |
| template | TATTCGTTCCATTACGATGGAACGCCAGCAGGACAGCATCATTATGGATGCCGCGACCCG   |
| query    | TATTCGTTCCATTACGATGGAACGCCAGCAGGACAGCATCATTATGGATGCCGCGACCCG   |
| template | CCGCAATCTGGAATTAACCCAGAACCTGGCCGGTGGTGTGCGAAAAATACCCTCGCCGCGGT |
| query    | CCGCAATCTGGAATTAACCCAGAACCTGGCCGGTGGTGTGCGAAAAATACCCTCGCCGCGGT |
| template | GCTTGACTGTACCGTGACGCCAATGGGTAGCCGAATGCTTAAACGCTGGCTGCATATGCC   |
| query    | GCTTGACTGTACCGTGACGCCAATGGGTAGCCGAATGCTTAAACGCTGGCTGCATATGCC   |
| template | GGTACGAAATACCGACATATTACGTGAACGCCAGCAGACCATCGGCGCCTTGCAGGACAC   |
| query    | GGTACGAAATACCGACATATTACGTGAACGCCAGCAGACCATCGGCGCCTTGCAGGACAC   |
| template | CGTCAGCGAACTGCAACCGGTGCTGCGTCAGGTCGGCGATTGGAGCGTACTCCTTGCGC    |
| query    | CGTCAGCGAACTGCAACCGGTGCTGCGTCAGGTCGGCGATTGGAGCGTACTCCTTGCGC    |
| template | GTCTGGCGCTGCGCA--GC-CGTCCGCGCATCTCGCCGAATGCGTCACGCCTTCCAGC     |
| query    | GTCTGGCGCTGCGCACCCGCGTCCGCGCATCTCGCCGAATGCGTCACGCCTTCCAGC      |
| template | AGCTGCC--GAATTGCACGCTCAGCTTGAAACCGTTGACAGCGCGCCGGTACA--GCGTTGC |
| query    | AGCTGCC--GAATTGCACGCTCAGCTTGAAACCGTTGACAGCGCGCCGGTACAGCGTTGC   |
| template | GTAAAAAATGGGCGATTTCGCCGAGCTGCGCGACCTCCTGGAACGCGCCATTATTGACG    |
| query    | GTAAAAAATGGGCGATTTCGCCGAGCTGCGCGACCTCCTGGAACGCGCCATTATTGACG    |
| template | CGCCGCCGGTACTGGTC--GCGACGGC--GCGTTATTGCGCCCGGCTACCATGAAGAGCTGG |
| query    | CGCCGCCGGTACTGGTC--GCGACGGC--GCGTTATTGCGCCCGGCTACCATGAAGAGCTGG |
| template | ACGAATGGCGCGCGCTGGCGGACGGCGCCACCATTATCTCGATCGTCTGGAATTCGCG     |
| query    | ACGAATGGCGCGCGCTGGCGGACGGCGCCACCATTATCTCGATCGTCTGGAATTCGCG     |
| template | AGCGCGAGCGTACCGGGCTGGATACGCTGAAAGTCGGCTATAACGCGGTACATGGTTATT   |
| query    | AGCGCGAGCGTACCGGGCTGGATACGCTGAAAGTCGGCTATAACGCGGTACATGGTTATT   |
| template | ACATTCAGATTAGCCGTGGTCAAAGCCATCTGGCGCCCATCAATTATGTGCGTCGCCAGA   |
| query    | ACATTCAGATTAGCCGTGGTCAAAGCCATCTGGCGCCCATCAATTATGTGCGTCGCCAGA   |
| template | CGCTGAAAAATGCCGAACGCTACATTATTCCTGAGCTTAAAGAGTACGAAGATAAAGTTC   |
| query    | CGCTGAAAAATGCCGAACGCTACATTATTCCTGAGCTTAAAGAGTACGAAGATAAAGTTC   |
| template | TGACCTCGAAAGGCAAAGCGCTGGCGCTGGAAAAACAGCTATATGACGAATTGTTTGATC   |
| query    | TGACCTCGAAAGGCAAAGCGCTGGCGCTGGAAAAACAGCTATATGACGAATTGTTTGATC   |
| template | TGCTGTTGCCGCATCTGGCCGATTACAGCAGAGCGCCAACGCGCTGGCGGAGCTGGATG    |
| query    | TGCTGTTGCCGCATCTGGCCGATTACAGCAGAGCGCCAACGCGCTGGCGGAGCTGGATG    |
| template | TGCTGGTTAACCTGGCCGAACGCGCTGGACGCTGAATTACACCTGCCCGACATTACCG     |
| query    | TGCTGGTTAACCTGGCCGAACGCGCTGGACGCTGAATTACACCTGCCCGACATTACCG     |
| template | ATAAACCCGGTATCCGTATTACCGAAGGTCGCCACCCGGTGGTTGAACAGGTACTGAATG   |
| query    | ATAAACCCGGTATCCGTATTACCGAAGGTCGCCACCCGGTGGTTGAACAGGTACTGAATG   |
| template | AGCCGTTTATCGCTAACCCGCTCAATTTATCGCCGACGCGCCGATGTTGATCATTACCG    |
| query    | AGCCGTTTATCGCTAACCCGCTCAATTTATCGCCGACGCGCCGATGTTGATCATTACCG    |
| template | GCCCCAATATGGGCGGTAAAAGTACCTATATGCGACAACCGCATTGATTGCCCTGCTGG    |
| query    | GCCCCAATATGGGCGGTAAAAGTACCTATATGCGACAACCGCATTGATTGCCCTGCTGG    |
| template | CCTATATCGGCAGTTACGTTCCGGCGCAAAACGTGGAAATCGGCCCATCGACCGTATTT    |
| query    | CCTATATCGGCAGTTACGTTCCGGCGCAAAACGTGGAAATCGGCCCATCGACCGTATTT    |
| template | TTACCCGCGTCGGCGCAGCGGACGACCTGGCCTCCGGGCGTTTCGACCTTTATGGTGGAGA  |
| query    | TTACCCGCGTCGGCGCAGCGGACGACCTGGCCTCCGGGCGTTTCGACCTTTATGGTGGAGA  |

|                |                                                                                                                              |
|----------------|------------------------------------------------------------------------------------------------------------------------------|
| template query | TGACCGAAACCGCGAACATTCTGCATAATGCCACGGAAACAGCTGGTATTGATGGATG<br>TGACCGAAACCGCGAACATTCTGCATAATGCCACGGAAACAGCTGGTATTGATGGATG     |
| template query | AAATCGGGCGCGGTACCTCCACGTATGACGGGCTGTCTGTTGGCCTGGGCTGCGCGGAGA<br>AAATCGGGCGCGGTACCTCCACGTATGACGGGCTGTCTGTTGGCCTGGGCTGCGCGGAGA |
| template query | ATCTCGGAATAAGATTAAGCGTTAACGCTGTTGCTACCCACTACTTCGAGCTGACCC<br>ATCTCGGAATAAGATTAAGCGTTAACGCTGTTGCTACCCACTACTTCGAGCTGACCC       |
| template query | AATTACCGGAGAAAATGGAAGGCGTGGCGAACGTCCACCTGGATGCGCTGGAACACGGCG<br>AATTACCGGAGAAAATGGAAGGCGTGGCGAACGTCCACCTGGATGCGCTGGAACACGGCG |
| template query | ATACTATCGCGTTTATGCACAGCGTGCAGGACGGCGGGCAAGTAAGAGCTATGGCCTGG<br>ATACTATCGCGTTTATGCACAGCGTGCAGGACGGCGGGCAAGTAAGAGCTATGGCCTGG   |
| template query | CGGTCGCGGCGCTTGCGGGCGTCCCTAAAGAAGTCATCAAACGCGCGGCCAGAACTCC<br>CGGTCGCGGCGCTTGCGGGCGTCCCTAAAGAAGTCATCAAACGCGCGGCCAGAACTCC     |
| template query | GCGAGCTGGAAGCATCTCGCCCAATGCGGCGGCAACGCAGGTGGACGGCACGCAATGT<br>GCGAGCTGGAAGCATCTCGCCCAATGCGGCGGCAACGCAGGTGGACGGCACGCAATGT     |
| template query | CGTTGCTTGCCGCCCGGAGGAGACATCGCCTGCCGTTGAAGCGCTGGAGAATCTCGATC<br>CGTTGCTTGCCGCCCGGAGGAGACATCGCCTGCCGTTGAAGCGCTGGAGAATCTCGATC   |
| template query | CGGACTCCCTGACGCCACGCCAGGCGCTGGAGTGGATCTATCGGCTGAAAAGTCTGGTGT<br>CGGACTCCCTGACGCCACGCCAGGCGCTGGAGTGGATCTATCGGCTGAAAAGTCTGGTGT |
| template query | AAACGTGTCAGACCCGATAGCGCCGCGCTATCGGG<br>AAACGTGTCAGACCCGATAGCGCCGCGCTATCGGG                                                   |

# ***SPI-12\_NC\_006905***

|                |                                                                                                                              |
|----------------|------------------------------------------------------------------------------------------------------------------------------|
| template query | CGGCACGTAGCGCAGCCTGGTAGCGACCGTCATGGGGTGTGGGGGTCGGAGGTTCAA<br>SAGACCACCAGCACGATAGATAACCGACTCATTACRGAACACATCAGAACAGCAGGATC     |
| template query | TCCTCTCGTGCCGACCAAAATTCCCTTAAAAGCCAGCCTGCCAGGGCTGGTTTTTTTAT<br>ATCCGCCAGCGGCTGTGATACCGCCGGGACCGCGCCGCGWGGCGAAAGATGAAWATTGYTC |
| template query | ATATCCAATTTGCAAATGGTGAAATGATGGTGAAATAGCTATCGAAGGTCACTGCAAATT<br>CGGCTCTGGTTCAAGCAGAACACGCCCTGCATAAACAGGGGCATCAGTTCGGMTCCCGG  |
| template query | GACTTCAAGCTCCCTCCAACGCGAAAAGTTGAACAGATGACTATAAATACATTGATTAGT<br>CCTGAACAATACAACGCCCATACGAGGAGCAATTTACGGGGTCAGTAACGCTCTCACGAT |
| template query | CATCCTTAACCAGTAGAATCCGCCACGACTGGTAACTATTCAATACACGCACTATCGAAC<br>CACCTCAATGAACGGTATCGAGCAGCTTCAGCAGCTCAGGGAATTTGGAYTCGAAGAAAT |
| template query | GATCGCCAGTTTGCCGAGCCCGTTCTTGATACAATGTGGCTGCGGCACACCATCACAT<br>GCGGYTGCGTCTCGCGAGGGTTTGCCGGGCTGGTGATGTTTTTGCCGAACATGCAGCCTT   |
| template query | CAGAAATTTGAAAATCAGGGCTAAACCTGTCACTTAACCTGAAGCGGGTGGTGATCGGG<br>TYGCCGTACGCGACCAGAATTTTAAATGCCGTAAATCGCGGAGCGACTGTAACGCTCAC   |
| template query | ATGACAGTATGTTTCTTTCATAGCCCACTGTTGCTGGATACCTCCCCGGCAAAGTACA<br>GATGTTCAACAACACCCAGCTTTGCTAACTGCTGATACGCCTGATTAGCCGTATCCgga    |
| template query | GCTTTCCTCGCCCTTCTTTGCATTAGGTGATCCAGTACTTCCATCGGCTTCTCGCTAC<br>tatttcacCTGTACATCATCCGTACTGTCTGATGTTGTTGCTCCGGGAATATCTTTGTCG   |
| template query | CGGCGCGCGGCGGTTATCATCGAAAAAGTTGCGCGCGGCCCTGACTGAAGAAGTCTCCC<br>CACCGCACCTCATTACCTGGTGATCAGTTACGACGCCACTGAACGTTCAGATAGCTCC    |
| template query | CTATTTACCTGTACATCATCCGTACTGTCTGATGTTGTTGTCGTCGGGAATATCTTTGTC<br>CCAGCATCTCCTCCACAAGAGGTCGCAGGCCATCCAAAAATGCTTTTTTCGCGCTCTCCA |
| template query | GCACCGCACCTCATTACCTGGTGATCAGTTACGACGCCACTGAACGTTTCAGATAGCTC<br>TCGCTCTTGCTCCGATAGTGCCTCTGCATCGGTATTACCGACCGCCAGACGGTCTCA     |

|                |                                                                                                                           |
|----------------|---------------------------------------------------------------------------------------------------------------------------|
| template query | CCAGCATCTCTCCACAAGAGGTGCGAGGCCATCCAAAAATGTCCTTTTTCGCGCTCTCCGCTCTGTGTCTCAGACAGCATCCGGTACGTTTCTCTATAATCCGATATTTGCTTTTCACGAA |
| template query | ATCGCTCTTGCTCCGATAGTGCCTCTGCATCGGTATTACCGACCAGCCCAGACGGTCTCGCGGTTAACGCGTTCCGGCGCTTTGCGCTCCAGCACTCTGTGTAACGGCCCCCACTGCA    |
| template query | AGCTCTGTGTCTCAGACAGCATCCGGTACGTTTCTCTATAATCCGATATTTGCTTTTCACGAGTATCCACTCCCTGAACTCGCTTTTTCAGCGGCTTTCACCTGAAGCTCCGCGTCTGAA  |
| template query | AGCGCGTTAACGCGTTCCGGCGCTTTGCGCTCCAGCACTCTGTGTAACGGCCCCCACTGCGGTCTGTAACCGTCACGCCGATACGTCAAAGAAACGCATTCTGACGTCACGCTGGTCA    |
| template query | AGTATCCACTCCCTGAACTCGCTTTTTCAGCGGCTTTCACCTGAAGCTCCGCGTCTGAGCCCCGAGTGATTTCTCAGCTTATTCTGATACGCCAGCCAGACCTCAATTTTCATCAACGA   |
| template query | AGGTCTGTAACCGTCACGCCGATACGTCAAAGAAACGCATTCTGACGTCACGCTGGTCGAGCCAGCGTTCTGACCTTTTCCCGGGCAATCTGTTCCAGTTTTCAGACGGAACATCT      |
| template query | AGCCCCGAGTGATTTCTTCAGCTTATTCTGATACGCCAGCCAGACCTCAATTTTCATCAACGCACGCCCCGTGGCAACGAGCGCCGAGATCGTTATCGTATTGCCCTTTTCTGCATTAT   |
| template query | AGAGCCAGCGTTCTGACCTTTTCCCGGCAATCTGTTCCAGTTTTCAGACGGAACATCTGTACCAGCTGTACGTTCTTCATCTGGTGCAAAAAAATGTGACCCGGTCTCGCAGCTTG      |
| template query | CACGCCCCGTGGCAACGAGCGCCGAGATCGTTATCGTATTGCCCTTTTCTGCATTATAGGTTGCCCTCTGTGCCATAGCAAAGGTGTTTGCTCTTAACGCCTCATCTTCAGCCAGTT     |
| template query | GTACCAGCTGTACGTTCTTCATCTGGTGCAAAAAAATGTGACCCGGTCTCGCAGCTTGGTGCCAGCCAGGACGATATCTGTGCCTTAAACCCCGCGTCTTTATGAAGTTTCCGCTCT     |
| template query | AGGTTGCCTCTGTGCCATAGCAAAGGTGTTTGCTCTCAACGCCTCATCTTCAGCCAGTTCACTCAGTCTGTCCAGGAAGAGGCTGAATGCGTCGGCGTTATCTTCTGTCCGAACATAT    |
| template query | GTGCCAGCCAGGACGATATCTGTGCCTTAAACCCCGCGTCTTTATGAAGTTTCCGTCTGCCATCTGTCTGCAGGAGCCGTTCCCTCCCGGGCAGGCACCGCAGTCAGCGGCCG         |
| template query | CACTCAGTCTGTCCAGGAAGAGGCTGAAGGCGTCGGCGTTATCTTCTGTCCGAACATATCCAGGTGCAGTGCCCGAGTTTCCCGGGGGCGGAGGCTCCCGCCATATCGAATCGTATTA    |
| template query | GCCATCTGTCTGCAGGAGCCGTTCCCTCCCGGGCAGGCACCGCAGTCAGCGGCCGTGGGGCTGAATAGCCAGGCGCGCTGGTGATCTCCCGCAGCGCTGCAAAGTACGTTACG         |
| template query | CCAGGCGCAGTGCCCGAGTTTCCCGGGGGCGGAGGCTCCCGCCATATCGAATCGTATTAACAGTGGGTCCCTTCCAGATTTACGGTTGTCTCTGAAGACAGATGAATGAGACTTCCG     |
| template query | TGGGGCTGAATAGCCAGGCGCGCTGGTGATCTCCCGCAGCGCTGCAAAGTACGTTACGTCAGGCGGGTCAGCTGGTTACGATAGACCGACAGCGACAGTAGTCTGACGGCAGCATCG     |
| template query | ACAGTGGGTCCCTTCCAGATTTACGGTTGTCTCTGAAGACAGATGAATGAGACTTTCCG GCAGGCTGGTCAGCCGGTTACCAGATACCATCAGTCTCTCAGTTCTGACGGCAGCACCG   |
| template query | GCAGGCGGGTCAGCTGGTTACGATAGACCGACAGCGACAGTAGTCTGACGGCAACGATCG GCAGACTGGTCAGCGGGTTACGATACAATCAGCTCCTTCAGTCTGACGGCAACGCGC    |
| template query | GCAGGCTGGTCAGCGGTTACGATACCATCAGTCTCTTCAGTTCTGACGGCAGCACCG GCAGGCTGGTCAGCCGATTATTATAGGCCACAGCTTATATAATTCTGACGGCAGCGTCG     |
| template query | GCAGACTGGTCAGCGGTTACGATACAATCAGTCTCTTCAGTCTGACGGCAACGCCG GCAGGCTGGCCAGTTGGTTATCAGATACCGACAGTCTCTGTAGCCCTGACGGCAACATCG     |
| template query | GCAGGCTGGTCAGCGGATTATTATAGGCCACAGCTTATATAATTCTGACGGCAGCGTCG GCAGGCTGGTCAGCTGGTTATTATAGGCCACAGCTTACATAATTCTGACGGCAGCGCGC   |
| template query | GCAGGCTGGCCAGTTGGTTATCAGATACCGACAGTCTGTAGCCCTGACGGCAACGTCG GCAGGCTGGCCAGTTGGTTATCAGATACCGACAGTCTGTAGCCCTGACGGCAACACCG     |
| template query | GCAGGCTGGTCAGCTGGTTATTATAGGCCACAGCTTACATAATTCTGACGGCAGCGCCG GCAGGCTGGTCAGTTGATTACAAAGATCCACAGCTTACATAGTCTGACGGCAGCGCCG    |
| template       | GCAGGCTGGCCAGTTGGTTATCAGATACCGACAGCTCTGTAGCCCTGACGGCAACACAC                                                               |

|          |                                                                 |
|----------|-----------------------------------------------------------------|
| query    | GCAGGTGGGTACAGCGGGTTACTAAAGAT--CGACAGTTCCAGTAGTCTCTGGCGGCAGCAC  |
| template | CGGCAGGCTGGTCAGCTGGTTATTATAGGCCCAAGCTTACATAGTCTGACGGCAGCGC      |
| query    | CGGCAGGCTAGTCAGCTGGTTACCAGAGACCTTCAGCGTCCGCAGTTCCTGGCGGCAGCGC   |
| template | CGGCAGGCTGGTCAGATTATTATCAGGAATAACCAAGTGTGGTAATATGCGCGGGTAAACA   |
| query    | CGGCAGGCTGGTCAGATTATTATCAGGAATAACCAAGTGTGGTAATATGCGCGGGTAAACA   |
| template | GTCTGGCAAGGTGGTAAGACCTGATTCTCCACGTTAAGCACTGCATTGCCATTATTCAG     |
| query    | GTCTGGCAAGGTGGTAAGACCTGATTCTCCACGTTAAGCACTGCATTGCCATTATTCAG     |
| template | GCAGGCACGCATTTTCTGTACCGCTGTGTGCACGGCCGCGTGACTCTTCTGCGGGTGACGC   |
| query    | GCAGGCACGCATTTTCTGTACCACTGTGTGCACGGCCGCGTGACTCTTCTGCGGGTGACGC   |
| template | CCTTCTCCACGCTGACCAGACAAATCATATACTCTGTCTGGCGTCTGTGGAGCCGTTGTGGC  |
| query    | CCTTCTCCACGCTGACCAGACAGCATCATATACTCTGTCTGGCGTCTGTGGAGCCGTTGTGGC |
| template | AGGGAGGAAGGATGTCCTGAATGTCCCGGATGCCCTTCCGCGTGTCTGTGCCCTCCTC      |
| query    | AGGGAGGAAGGATGTCCTGAATGTCCCGGATGCCCTTCCGCGTGTCTGTGCCCTCCTC      |
| template | ACCCTGTGCTGTGTCCAGGGTGAGGCGATGGGTTTCACTGTACCCCTGGCAATTTACGGT    |
| query    | ACCCTGTGCTGTGTCCAGGGTGAGGCGATGTGTTTCACTGTACCCCTGGCAATTTACGGT    |
| template | ATAGTTCCTGCATCATCAAGGGTGACTGACAAATCTCTCTGACTGTCTTCATCCAGAAT     |
| query    | ATAGTTCCTGCATCATCAAGGGTGACTGACAAATCTCTCTGACTGTCTTCATCCAGAAT     |
| template | ACAGAAGTAGTTTTTCCCGTGCAAGCCGGAATGAATGTTTTCTCCCATCCGTATACGC      |
| query    | ACAGAAGTAATTTTTCCCGTGCTGGCCGGAATGAATGTTTTCTCCCATCCGGTATACGC     |
| template | GAGCGTCTGAGCAGTTCAAATCTGTGACACATCCTCCGCGTCGTTCCGGCCGGCGG        |
| query    | GAGCGTCTGAGCAGTTCAAATCTGTTGATCACATCCTCCGCGTCGTTCCGGCCGGCGG      |
| template | GTGACAAATCGCCAGATGCACTCCAGCGCTTCAGTCTGGTGCGTTGAGCAAAAAAATTC     |
| query    | GTGACAAATCGTCCAGATGCACTCCAGCGCTTCAGTCTGGTGCGTTGAGCAAAAAAATTC    |
| template | CTTCATTTTTTCCAGGAACCTATTTCAAGGGGGGGTATCAGACCAGGCAATACGATAAA     |
| query    | CTTCATTTTTTCCAGGAACCTATTTCAAGGGGGGGTATCAGACCAGGCAATACGATAAA     |
| template | TGCGACGGTTACTGATGGTGGCGGGAAGACATCCGCTTCCAATATGAAAGGGCATAACAA    |
| query    | TGCGGCGTTACTGATGGTGGCGGGAAGACATCCGCTTCCAATATGAAAGGGCATAACAA     |
| template | AAAACCTTTATAAAATTTACATATAGTATCTGTCCGGCAGACATCATCTCTTCTGGTCTT    |
| query    | AAAACCTTTATAAAATTTACATATAGTATCTGTCCGGCAGACATCATCTCTTCTGGTCTT    |
| template | AATTTACAATAAGGTTATCGGCGGATTATGGTCGTCTGTCCATGGCGGGCTTCAGAAG      |
| query    | AATTTACAATAAGGTTATCGGCGGATTATGGTCGTCTGTCCATGGCGGGCTTCAGAAG      |
| template | GTGCAGAAGAAAAATCCGTTATGATGACCGGATGGCGGGACTGTCATTTTACAGCTAAAG    |
| query    | GTGCAGAAGAAAAATCCGTTATGATGACCGGATGGCGGGACTGTCATTTTACAGCTAAAG    |
| template | TGTCGA-TTTTTCAGGGTCGCTTTCCACGATGACCAGATCATCCGGTATCAACGCCCGGG    |
| query    | TGTCGATTTTTTCAGGGTCGCTTTCCACGATGACCAGATCATCCGGTATCAACGCCCGGG    |
| template | CGTTCAATTTTTCGATTCTGCCTGCCTGCGCAGCTCTTCCGGCGAATAAACCTTTGAACG    |
| query    | CGTTCAATTTTTCGATTCTGCCTGCCTGCGCAGCTCTTCCGGCGAATAAACCTTTGAACG    |
| template | ACTTTACTGTCTTTAAACTGCCAGCAGCATGAAATATCAGCGCGACGGTTTTCATCCGTA    |
| query    | ACTTTACTGTCTTTAAACTGCCAGCAGCATGAAATATCAGCGCGACGGTTTTCATCCGTA    |
| template | TCAGGCAACTCTGCAACGCTCTGGCCAGCAGGCCACAGCCCAGAAACATCATGCGTAATA    |
| query    | TCAGGCAACTCTGCAACGCTCTGGCCAGCAGGCCACAGCCCAGAAACATCATGCGTAATA    |
| template | CACGTAATAACATCGTTATCGTCGTAGGTAATTTTCAGCGTGTCTGCTGAAAAATAATTGC   |
| query    | CACGTAATAACATCGTTATCGTCGTAGGTAATTTTCAGCGTGTCTGCTGAAAAATAATTGC   |
| template | TGGCACCCATACCAAGTCTGACCATCCTCTGATTTAAGATACGCCGCATCGGCGAATAAT    |
| query    | TGGCACCCATACCAAGTCTGACCATCCTCTGATTTAAGATACGCCGCATCGGCGAATAAT    |
| template | GTGTCATCTGGTTCGGGTGCATACGGAATGAAATTTTTAATATTTAAAAACTGTTTGTTT    |
| query    | GTGTCATCTGGTTCGGGTGCATACGGAATGAAATTTTTAATATTTAAAAACTGTTTGTTT    |



|          |                                                              |                                                              |
|----------|--------------------------------------------------------------|--------------------------------------------------------------|
| template | TTTTTA                                                       | TTTTTTTCCGCTGTCATAATTATTCCTTCTTATACACTTGGGGCTGTCAACCA        |
| query    | TTTTTA                                                       | TTTTTTTCCGCTGTCATAATTATTCCTTCTTATACACTTGGGGCTGTCAACCA        |
| template |                                                              |                                                              |
| template | CGTATCACCAACCAGATACTGAATGGGACGTTGTCAACCGAATAGTCATCGCGCCACGCA |                                                              |
| query    |                                                              | CGTATCACCAACCAGATACTGAATGGGACGTTGTCAACCGAATAGTCATCGCGCCACGCA |
| template |                                                              |                                                              |
| template | CTCCCATTACCTCAATCACTGCGCCAGCGAGACAGATATTACCGAGCCAGTATCCGTGA  |                                                              |
| query    |                                                              | CTCCCATTACCTCAATCACTGCGCCAGCGAGACAGATATTACCGAGCCAGTATCCGTGA  |
| template |                                                              |                                                              |
| template | TGATTTTGT                                                    | TATAAGCGTAAGACCAGGAGCCACGACACATCCAGTAAGGGTGATTGAATG          |
| query    | TGATTTTGT                                                    | TATAAGCGTAAGACCAGGAGCCACGACACATCCAGTAAGGGTGATTGAATG          |
| template |                                                              |                                                              |
| template | CGCCCTGAGACTCCAGCCAGACGATAAACTCCGCCGTCGTCCACGGATTATCATCACAGC |                                                              |
| query    |                                                              | CGCCCTGAGACTCCAGCCAGACGATAAACTCCGCCGTCGTCCACGGATTATCATCACAGC |
| template |                                                              |                                                              |
| template | CGATA                                                        | GTAAGTAACTGCGCCATCAAACGCTCGCGGGCACCAGATACGACGCACAAACAAATCCT  |
| query    | CGATA                                                        | GTAAGTAACTGCGCCATCAAACGCTCGCGGGCACCAGATACGACGCACAAACAAATCCT  |
| template |                                                              |                                                              |
| template | TGTCCGGAATATCGCCGCCATTCTGTGATTTTGT                           | AATGCATCGCGGCACGACTTATGG                                     |
| query    | TGTCCGGAATATCGCCGCCATTCTGTGATTTTGT                           | AATGCATCGCGGCACGACTTATGG                                     |
| template |                                                              |                                                              |
| template | TTTCTCGAAACCAACGTATTCGATAAGACCGTCAAC                         | GCTTTTTCCTGACAGCGCCGTCA                                      |
| query    | TTTCTCGAAACCAACGTATTCGATAAGACCGTCAAC                         | GCTTTTTCCTGACAGCGCCGTCA                                      |
| template |                                                              |                                                              |
| template | GGGTTTCGTCCAGCGGCTGCTTGCCCGCCAGTTTATT                        | CAGTACCGTGGTGGCAAAGTTCG                                      |
| query    | GGGTTTCGTCCAGCGGCTGCTTGCCCGCCAGTTTATT                        | CAGTACCGTGGTGGCAAAGTTCG                                      |
| template |                                                              |                                                              |
| template | GATCATTTCCCAAC                                               | ACGTACAGCCAGTTCTTGCAGGGTGTCAGTGGCTCCAGTACGGAAC               |
| query    | GATCATTTCCCAAC                                               | ACGTACAGCCAGTTCTTGCAGGGTGTCAGTGGCTCCAGTACGGAAC               |
| template |                                                              |                                                              |
| template | CAACCAGCGCGCAATCAGTTTGCGGACAAACTCCGCGTTTGT                   | TGTCTGAAGCCCTTTAG                                            |
| query    | CAACCAGCGCGCAATCAGTTTGCGGACAAACTCCGCGTTTGT                   | TGTCTGAAGCCCTTTAG                                            |
| template |                                                              |                                                              |
| template | CATCGCCT                                                     | AGCGGCGTCGGTGTGGTCGGCGTTCCAGTGAATGCCGGGCTGTCCAGCGGCG         |
| query    | CATCGCCT                                                     | AGCGGCGTCGGTGTGGTCGGCGTTCCAGTGAATGCCGGGCTGTCCAGCGGCG         |
| template |                                                              |                                                              |
| template | CTTTGGTCCGTACCTACCCATAACGGTTTTTACC                           | GCCTTTGGTGTGGCCGCCAGCGCTT                                    |
| query    | CTTTGGTCCGTACCTACCCATAACGGTTTTTACC                           | GCCTTTGGTGTGGCCGCCAGCGCTT                                    |
| template |                                                              |                                                              |
| template | CGCTGTCACTGTCCGTGGCACTGCTTAATTTAACGATACCTTTTTT               | CGTCAGGCTTGCAT                                               |
| query    | CGCTGTCACTGTCCGTGGCACTGCTTAATTTAACGATACCTTTTTT               | CGTCAGGCTTGCAT                                               |
| template |                                                              |                                                              |
| template | CTTCCAGGGAAATCACGTCTGCGATATCCTCGGCCGTTT                      | CGCGCCTCTTCGGCTTGG                                           |
| query    | CTTCCAGGGAAATCACGTCTGCGATATCCTCGGCCGTTT                      | CGCGCCTCTTCGGCTTGG                                           |
| template |                                                              |                                                              |
| template | TTGCC                                                        | GATTCTCCGGCTGCAGCTCTGCTTTGCGCTGCCAGTGATGCG                   |
| query    | TTGCC                                                        | AATTCTCCGGCTGCAGCTCTGCTTTGCGCTGCCAGTGATGCG                   |
| template |                                                              |                                                              |
| template | CGGCGGCGTGGGTGGATGCCT                                        | ACGATGCTGATGACGAGGCGGCTGCCGCCGTTCTGGCTG                      |
| query    | CGGCGGCGTGGGTGGATGCCT                                        | ACGATGCTGATGACGAGGCGGCTGCCGCCGTTCTGGCTG                      |
| template |                                                              |                                                              |
| template | TGT                                                          | CAGCCGACGCCGCGTGGCTGATGCCTCCCCGGCTTTTGTGGTCGCCGTACCTGCGC     |
| query    | TGT                                                          | CAGCCGACGCCGCGTGGCTGATGCCTCCCCGGCTTTTGTGGTCGCCGTACCTGCGC     |
| template |                                                              |                                                              |
| template | TGCTCTCCG                                                    | CAGATGCTGCGGATGAAGCTGCCGACCAAAATCCCCTTGAAAACAGCCT            |
| query    | TGCTCTCCG                                                    | CAGATGCTGCGGATGAAGCTGCCGACCAAAATCCCCTTGAAAACAGCCT            |
| template |                                                              |                                                              |
| template | GTCAGGGCTGGTTTTTTTATGCCTACAATTAAAAAGTTAGCTGATGCCAGAGACGTTATT |                                                              |
| query    | GTCAGGGCTGGTTTTTTTATGCCTACAATTAAAAAGTTAGCTGATGCCAGAGACGTTATT |                                                              |
| template |                                                              |                                                              |
| template | TTGCATGAACTGATTTTGCATGAACTGATTGGACATCTTTCCTGTGCAGTGGT        | CACAGTA                                                      |
| query    | TTGCATGAACTGATTTTGCATGAACTGATTGGACATCTTTCCTGTGCAGTGGT        | CACAGTA                                                      |
| template |                                                              |                                                              |
| template | AAGTCAATGCAGGCAACTAACGTAACCATGTTTGTACTAAAACAGAAAAAGCGCATCTA  |                                                              |
| query    | AAGTCAATGCAGGCAACTAACGTAACCATGTTTGTACTAAAACAGAAAAAGCGCATCTA  |                                                              |
| template |                                                              |                                                              |
| template | CACCC                                                        | TATACTGGAAAAAATGTTTGCAGTGGCAGGTAATGAGTAAGCAATCTGTCGCAG       |
| query    | CACCC                                                        | TATACTGGAAAAAATGTTTGCAGTGGCAGGTAATGAGTAAGCAATCTGTCGCAG       |

|          |                                                                |
|----------|----------------------------------------------------------------|
| template | CAATAATAAAACGTTCTCGGTAAGGTAAACGGCCTACACGCGCTTTGTGCGCTAACAATTAG |
| query    |                                                                |
| template | CCTCCCTGTCGCCATAGGGTCGATAACGATCGGCTATTACAAACACGTTTTGTAGACAAC   |
| query    | CCTCCCTGTCGCCATAGGGTCGATAACGATCGGCTATTACAAACACGTTTTGTAGACAAC   |
| template | GTACGGTGATTAATTACTCCTTCAGCCAGCAACTCGCTAATTGTTATTCAACTTCAGAAA   |
| query    | GTACGGTGATTAATTACTCCTTCAGCCAGCAACTCGCTAATTGTTATTCAACTTCAGAAA   |
| template | TTATAACTAATTGAAGCACCTACAAAATTATGCCCTGAATTTTATCCGTAAGTGATCCA    |
| query    | TTATAACTAATTGAAGCACCTACAAAATTATGCCCTGAATTTTATCCGTAAGTGATCCA    |
| template | TTCGAGAAATGCCGGATATAAGCTTCTGTAGAAAAAGCCCCAAAGTTCCAGCCAAGAAAC   |
| query    | TTCGAGAAATGCCGGATATAAGCTTCTGTAGAAAAAGCCCCAAAGTTCCAGCCAAGAAAC   |
| template | GCTTTTTCTCCAAAGGTAAATGCAGAATTGACACGCATATCATCTCGCGACTTAGATTTT   |
| query    | GCTTTTTCTCCAAAGGTAAATGCAGAATTGACACGCATATCATCTCGCGACTTAGATTTT   |
| template | ATATAAGCCCCAGACCAATACCGGTATAGATACCAGCGAAATGAACCAGCGCCACATCC    |
| query    | ATATAAGCCCCAGACCAATACCGGTATAGATACCAGCGAAATGAACCAGCGCCACATCC    |
| template | TTCGAGATACCCAATACGCCCTGGTTATATTTATTGCAGGGAACGCTGCCAGAATGTTTA   |
| query    | TTCGAGATACCCAATACGCCCTGGTTATATTTATTGCAGGGAACGCTGCCAGAATGTTTA   |
| template | CTGCAATCATCGCTACCCTTAGCCTTAAATCCTCCTAACTCCAGATTATTTCTTGCCTGT   |
| query    | CTGCAATCATCGCTACCCTTAGCCTTAAATCCTCCTAACTCCAGATTATTTCTTGCCTGT   |
| template | AAAAAGAAAAAATCGCTGGGTTCACTGTATGTCAGAAAAGCCGTATATAAGTGCTCAACC   |
| query    | AAAAAGAAAAAATCGCTGGGTTCACTGTATGTCAGAAAAGCCGTATATAAGTGCTCAACC   |
| template | CCTCCTCTTCTTATACTTTCTCCGCAGCAAAAGAGATCTGATGCTTGTAGCCCTGGCCA    |
| query    | CCTCCTCTTCTTATACTTTCTCCGCAGCAAAAGAGATCTGATGCTTGTAGCCCTGGCCA    |
| template | AAAAAAACATTATCATTAGCAGAACATGCGAATGCACAAGGTAATAATAGATATATAAAT   |
| query    | AAAAAAACATTATCATTAGCAGAACATGCGAATGCACAAGGTAATAATAGATATATAAAT   |
| template | ATTCTCTTCATATACACTCCACCACCATTTCAATGTCAATAGTTATTTTAAACGGCTAA    |
| query    | ATTCTCTTCATATACACTCCACCACCATTTCAATGTCAATAGTTATTTTAAACGGCTAA    |
| template | CATATTTAAAAATTTCTACGCCACGCTTACGCTTACAGAAAACGACTGATATAGCATCCAC  |
| query    | CATATTTAAAAATTTCTACGCCACGCTTACGCTTACAGAAAACGCTGATATAGCATCCAC   |
| template | ACTACGTTCTCCCCTTGAGTCGCCCAACGGGTGCTCAAAACGCCGCGAGTGTTGTTTCAG   |
| query    | ACTACGTTCTCCCCTTGAGTCGCCCAACGGGTGCTCAAAACGCCGCGAGTGTTGTTTCAG   |
| template | GCACATCCAGGATAAGTTATAAGTGAATGACACTCATTTCTGACCACATTTTCATTTATG   |
| query    | GCACATCCAGGATAAGTTATAAGTGAATGACACTCATTTCTGACCACATTTTCATTTATG   |
| template | ATAAGAATATCGTCAGAATCTCTTTATCGCATAAAAAATACCTCTGCTATTGACTTAATAT  |
| query    | ATAAGAATATCGTCAGAATCTCTTTATCGCATAAAAAATACCTCTGCTATTGACTTAATAT  |
| template | TTAATTTAACAGATGTCGCGGTTTATTTCGTTCTGCTCAGATGATTTTCATTGACATTAAT  |
| query    | TTAATTTAACAGATGTCGCGGTTTATTTCGTTCTGCTCAGATGATTTTCATTGACATTAAT  |
| template | AAAACCATAAATAAATTCAGTTAAAATAATTTGTTAATAATGACAAGCTTTAGACGCTAT   |
| query    | AAAACCATAAATAAATTCAGTTAAAATAATTTGTTAATAATGACAAGCTTTAGACGCTAT   |
| template | GACTTTTAATAAGGAATTTCTGCCAGTAAAGATAGTCTGGACTTACGGGTGCAAGGGCG    |
| query    | GACTTTTAATAAGGAATTTCTGCCAGTAAAGATAGTCTGGACTTACGGGTGCAAGGGCG    |
| template | CAGCAACATATGCCCACTTCTGTTATGTCACATTGTCCGAAAAGAGCGTCCAGACCAGT    |
| query    | CAGCAACATATGCCCACTTCTGTTATGTCACATTGTCCGAAAAGAGCGTCCAGACCAGT    |
| template | ATTCAACTTCAGGGAGTATTCTGTTTTCTCTCACAACGGGTTGTTTTATCCTTCTATCG    |
| query    | ATTCAACTTCAGGGAGTATTCTGTTTTCTCTCACAACGGGTTGTTTTATCCTTCTATCG    |
| template | TTCAGCTAATTACTCGCCTGTCACAGGTTTTACTACTTACCATGCACATAATTAGGGTAA   |
| query    | TTCAGCTAATTACTCGCCTGTCACAGGTTTTACTACTTACCATGCACATAATTAGGGTAA   |
| template | AATTTACGCGCTTGACAATGTGGCAAACTGGACGATTTCCGCGTGAAAAACAATAATCA    |

|          |                                                                |
|----------|----------------------------------------------------------------|
| query    | AATTTACGCGCTTGACAATGTGGCAAATCTGGACGATTTTCGCGCTGAAAAACAATATCA   |
| template | TTCTAATAAAACTCAGGAGATACAGCATGCCTGAAGTAACACCTTTTCAGGTGCTATTG    |
| query    | TTCTAATAAAACTCAGGAGATACAGCATGCCTGAAGTAACACCTTTTCAGGTGCTATTG    |
| template | TGGACGACCATCCACTTATGCGGCGAGGTATTCGTCAATTACTGGAACGGACCCGGCTT    |
| query    | TGGACGACCATCCACTTATGCGGCGAGGTATTCGTCAATTACTGGAACGGACCCGGCTT    |
| template | TTCATGTCGTTGCCGAAGCGGGTGACGGGGCGAGTGCGATCGATCTGGCGAATCGCATTG   |
| query    | TTCATGTCGTTGCCGAAGCGGGTGACGGGGCGAGTGCGATCGATCTGGCGAATCGCATTG   |
| template | AGCCCCGATCTGATCCTGCTGGATCTGAATATGAAAGGTCTGAGCGGGTTAGATACCTGA   |
| query    | AGCCCCGATCTGATCCTGCTGGATCTGAATATGAAAGGTCTGAGCGGGTTAGATACCTGA   |
| template | ACGCGCTACGCCGGGATGGTGTGACGGCGCAAATTATTATTCTTACCGTCTCGGATTCCG   |
| query    | ACGCGCTACGCCGGGATGGTGTGACGGCGCAAATTATTATTCTTACCGTCTCGGATTCCG   |
| template | CCAGCGACATCTACGCGTGATCGACGCCGGCGCCGACGGTTATCTGCTCAAAGATAGCG    |
| query    | CCAGCGACATCTACGCGTGATCGACGCCGGCGCCGACGGTTATCTGCTCAAAGATAGCG    |
| template | ATCCGGAAGTGCTGCTGGAGGCCATTTCGCAAAGCGCTAACGGCGGTAAAGTCTTTAGCG   |
| query    | ATCCGGAAGTGCTGCTGGAGGCCATTTCGCAAAGCGCTAACGGCGGTAAAGTCTTTAGCG   |
| template | ATCGGGTCAATGAATATCTGCGTGAGCGCGAACGGTTTGGCGCGCAGGAAGATCCCTTTA   |
| query    | ATCGGGTCAATGAATATCTGCGTGAGCGCGAACGGTTTGGCGCGCAGGAAGATCCCTTTA   |
| template | GTATCCTGACCGAACGAGAGTTAGATGTCTTGATGAGCTGGCGCAGGGGCTTTCTAACA    |
| query    | GTATCCTGACCGAACGAGAGTTAGATGTCTTGATGAGCTGGCGCAGGGGCTTTCTAACA    |
| template | AACAAGATTGCGTCAGTACTGAATATTTCTGAGCAGACGGTTAAGGTGCACATTTCGTAATC |
| query    | AACAAGATTGCGTCAGTACTGAATATTTCTGAGCAGACGGTTAAGGTGCACATTTCGTAATC |
| template | TACTTCGCAAGCTAAACGTGCGCTCAGCGTCGCGGCGACCATTTCTATTTTACAAACAC    |
| query    | TACTTCGCAAGCTAAACGTGCGCTCAGCGTCGCGGCGACCATTTCTATTTTACAAACAC    |
| template | GCGGAATGCAGTAACAAGCCAGGCCCGATGGCGCCACGCCACTGGGCCGTCAAGGCTT     |
| query    | GCGGAATGCAGTAACAAGCCAGGCCCGATGGCGCCACGCCACTGGGCCGTCAAGGCTT     |
| template | TTTCTCCTGCGCCAGCCGGATACGCGCTCTATCACCGCCCGCCGGGCGTCACCCGCCGG    |
| query    | TTTCTCCTGCGCCAGCCGGATACGCGCTCTATCACCGCCCGCCGGGCGTCACCCGCCGG    |
| template | CAGCAGCTTCAGCATCATCTCCCAGGCCGCCACCGCCTCGCCAAAGCGCTGCTGCTCAA    |
| query    | CAGTAAGCTTCAGCATCATCTCCCAGGCCGCCACCGCCTCGCCAAAGCGCTGCTGCTCAA   |
| template | GGCGTTAAACGCATACAGGCTTAACACCCGGATATCCGTGTGGTCGCGGCTCACCAGCTG   |
| query    | GGCGTTAAACGCATACAGGCTTAACACCCGGATATCCGTGTGGTCGCGGCTCACCAGCTG   |
| template | ACGCAGCAGCTCCCGCCGCGACGGTTATCCTCCGGGTCGGACGAGCGGTGAGCGCCTC     |
| query    | ACGCAGCAGCTCCCGCCGCGACGGTTATCCTCCGGGTCGGACGAGCGGTGAGCGCCTC     |
| template | CGCGTAGCCAGCGCCGCATCGCGGTTTTTCGGGTCCAGGTGGTAGCGGTTTCGATAGCG    |
| query    | CGCGTAGCCAGCGCCGCATCGCGGTTTTTCGGGTCCAGGTGGTAGCGGTTTCGATAGCG    |
| template | CCCGGTGGCGGTACCGGCATTACCCAGTACCATAACCGGTGCGCCCCAGCATGAGCCAGCC  |
| query    | CCCGGTGGCGGTACCGGCATTACCCAGTACCATAACCGGTGCGCCCCAGCATGAGCCAGCC  |
| template | CTCAACATTGCCGGCATCATTTGAGGCGGGTGCGCAGCCCCAGCGCCAGCCGCGCCAT     |
| query    | CTCAACATTGCCGGCATCATTTGAGGCGGGTGCGCAGCCCCAGCGCCAGCCGCGCCAT     |
| template | CTCCTCCTCATTCAGCGGCTGCGCCTGCGGGTCCAGCGCCCGCGCCAGCAGTCCCGGCGT   |
| query    | CTCCTCCTCATTCAGCGGCTGCGCCTGCGGGTCCAGCGCCCGCGCCAGCAGTCCCGGCGT   |
| template | CTGCGCGGTTGCTGCTGCCAGGCCCTCACCTGCGGATAGTGCCGGTCAAGGGCTAGCT     |
| query    | CTGCGCGGTTGCTGCTGCCAGGCCCTCACCTGCGGATAGTGCCGGTCAAGGGCTAGCT     |
| template | GCCGGCGCCGACCGCCAGCGCAATGACGGCCCCGGCACGTAAGCCCCACCCGGCGCG      |
| query    | GATGGCGCCGACGACAGCGCATAAACACGCCCGGCACGTAAGCCCCACCCGGCGCG       |
| template | CGCGCC-GCAAACCGGGGGTCCGCCGGC-AGCGGC-TCCCGGCGCAGGCGCACCCGCCG    |
| query    | CGGTCCGCCG-CAGGAATGGC-GTCGGCCAG-GACGTCCTGTCTGATACGCACCCGCCG    |

|          |                                                               |                                                |                       |
|----------|---------------------------------------------------------------|------------------------------------------------|-----------------------|
| template | GCGCGTGC                                                      | GGGCGACGATTATCCACCCGCCGCCACGATGG               | GGCCAGCGGCAGCACCCA    |
| query    | GCGCGTGC                                                      | GGGCGACGATTATCCACCCGCCGCCACGATGG               | TGGCCAGCGGCAGCACCCA   |
| template | CAGCAGCACCGTCAGCGGGGT                                         | CAGCGCGGGTCTGAGGTGAC                           | GAAGTTGCCGTAGCGCGC    |
| query    | CAGCAGCACCGTCAGCGGGGT                                         | CAGCGCGGGTCTGAGGTGAC                           | GAAGTTGCCGTAGCGCGC    |
| template | CACCATATAATCGATGATTTCCTGGCGGCTCTTCCCCTCCTGCATCAGGTCATACACCT   |                                                |                       |
| query    | CACCATGTAATCGATGATTTCCTGGCGGCTCTTCCCCTCCTGCATCAGGTCATACACCT   |                                                |                       |
| template | GCGACGCATGTCGGTGGCTATCATCGCGTTCGAGTCCGCAATGCTGTTGTTCTGGCATT   |                                                |                       |
| query    | GCGGCGCATGTCGGTGGCTATCATCGCGTTCGAGTCCGCAATGCTGTTGTTCTGGCATT   |                                                |                       |
| template | CGGGCAGCGCAGCTGCTCCGTGAGCTGGCGGAAGTCTGCTCCTGCGCTTCATCTTTAAA   |                                                |                       |
| query    | CGGGCAGCGCAGCTGCTCCGTGAGCTGGCGGAAGTCTGCTCCTGCGCTTCATCTTTAAA   |                                                |                       |
| template | CGGCATCACGTCGGTGGT                                            | GCCCGCGCTGACCCGGCGATAACCAGC                    | GCCAGCATCAGCAT        |
| query    | CGGCATCACGTCGGTGGT                                            | GCCCGCGCTGACCCGGCGATAACCAGC                    | ACCAGCATCAGCAT        |
| template | CACCATGCCCGGTAAACAGTCTCATTGCGCGCCTCCCGGCTGTATCTGTCCCACAGCGGT  |                                                |                       |
| query    | CACCATGCCCGGTAAACAGTCTCATTGCGCGCCTCCCGGCTGTATCTGTCCCACAGCGGT  |                                                |                       |
| template | TTAGTTCACTTTCCCATACCCGGGCATTCAAATCGCCCGCATGGCGGTAGCGGATAATC   |                                                |                       |
| query    | TTAGTTCACTTTCCCATACCCGGGCATTCAAATCGCCCGCATGGCGGTAGCGGATAATC   |                                                |                       |
| template | CCGTTGCCGTCGATGAGGAAGGTTTCCGGCGCGCGGTACACGCCAGGTCCAGCCCCAGC   |                                                |                       |
| query    | CCCTTGCCGTCGATGAGGAAGGTTTCCGGCGCGCGGTACACGCCAGGTCCAGCCCCAGC   |                                                |                       |
| template | ATCCCGTCGCTGTCCGATAAACTCAGCGCATACGGGTTGCCAGTTCTTTTAACCAGGCC   |                                                |                       |
| query    | ATCCCGTCGCTGTCCGATAAACTCAGCGCATACGGGTTGCCAGTTCTTTTAACCAGGCC   |                                                |                       |
| template | ACCGCCTTCGCCCGGTCTGCTCTTATAGTTTCAGCCC                         | ACCACCCGGATACCTGCGCAGAA                        |                       |
| query    | ACCGCCTTCGCCCGGTCTGCTCTTATAGTTTCAGCCC                         | ACCACCCGGATACCTGCGCAGAA                        |                       |
| template | AGCTGGTTCAGGTA                                                | CTGATGCTCGGCGCGGCAGGTCGGGCACCAAGGTGGCCAGACGTTA |                       |
| query    | AGCTGGTTCAGGTA                                                | CTGATGCTCGGCGCGGCAGGTCGGGCACCAAGGTGGCCAGACGTTA |                       |
| template | AGCAGCACCGGTTTCCCCTGCGTCAGCACCTCCGCCTGATAGTA                  | CTGACCCGGCGTCTCC                               |                       |
| query    | AGCAGCACCGGTTTCCCCTGCGTCAGCACCTCCGCCTGATAGTA                  | CTGACCCGGCGTCTCC                               |                       |
| template | AGCGATTCCAGGCGGAAC                                            | CCGGCACCGGCTTCCGGTCAG                          | GCCGATTTCGAGATTCTGTC  |
| query    | AGCGATTCCAGGCGGAAC                                            | CCGGCACCGGCTTCCGGTCAG                          | TGCCGATTTCGAGATTCTGTC |
| template | GGGTCATCCCCCTGCGCGTTGCGCGCCAGCTGCCACAGCAGCGCCGCGGAATCAGCAGA   |                                                |                       |
| query    | GGGTCATCCCCCTGCGCGTTGCGCGCCAGCTGCCACAGCAGCGCCGCGGAATCAGCAGA   |                                                |                       |
| template | AAAAATCAGCAGCGGTAATAACAGTACGTTGCGTTTCATCCGGCCTCCGGCAATGGTTTAC |                                                |                       |
| query    | AAAAATCAGCAGCGGTAATAACAGTACGTTGCGTTTCATCCGGCCTCCGGCAATGGTTTAC |                                                |                       |
| template | GGCGGCGGTAGCGCGGGTCCGCCAGGCACAGCAGCCGCCAGCGCCATCAGCAGTCCCC    |                                                |                       |
| query    | GGCGGCGGTAGCGCGGGTCCGCCAGGCACAGCAGCCGCCAGCGCCATCAGCAGTCCCC    |                                                |                       |
| template | CGGCCCATATCCAGCGGACAAACGGTTTGTA                               | GTACAGGCGCACGGCCACGCGCGGTTGT                   |                       |
| query    | CGGCCCATATCCAGCGGACAAACGGTTTGTA                               | GTACAGGCGCACGGCCACGCGCGGTTGT                   |                       |
| template | CCAGCTCCTCCCCGAGCGCGGCTACAGGTCGCGGGTCAGCCGCGCTCAATCGCCGCCT    |                                                |                       |
| query    | CCAGCTCCTCCCCGAGCGCGGCTACAGGTCGCGGGTCAGCCGCGCTCAATCGCCGCCT    |                                                |                       |
| template | CGGTCATACCATCCGGCTGGTGTGTAGAGCCGTTTCTCCGCGTGACGACCGCCTCCG     |                                                |                       |
| query    | CGGTCATACCATCCGGCTGGTGTGTAGAGCCGTTTCTCCGCGTGACGACCGCCTCCG     |                                                |                       |
| template | GCTCGCCGTGGCGGTCACCCCGATGAGGGCCACCCCGCGCGGTAGTTGGG            | CCGGTGA                                        |                       |
| query    | GCTCGCCGTGGCGGTCACCCCGATGAGGGCCACCCCGCGCGGTAGTTGGG            | CCGGTGA                                        |                       |
| template | TGTCCCGCACCTCCCGGAAGGTGAAGCGGTAGTCGTGAATGGTCACGCTGTCGCCCGCC   |                                                |                       |
| query    | TGTCCCGCACCTCCCGGAAGGTGAAGCGGTAGTCGTGAATGGTCACGCTGTCGCCCGCC   |                                                |                       |
| template | GCATCCGCACGTCACGCTCCACGCTGTAATTCTGGCTGAAGGCGATGCCGGTAATCGTCA  |                                                |                       |
| query    | GCATCCGCACGTCACGCTCCACGCTGTAATTCTGGCTGAAGGCGATGCCGGTAATCGTCA  |                                                |                       |

|          |                                                                |
|----------|----------------------------------------------------------------|
| template | CCGCCAGCCCCGAGGTGCGCCGCCACCATTCCCCAGTAGCTGAGAGAGGTTTTCTGTGCCGC |
| query    | CCGCCAGCCCCGAGGTGCGCCGCCACCATTCCCCAGTAGCTGAGAGAGGTTTTCTGTGCCGC |
| template | GGGACACGCGCTGTACGGCTTCGGCCACCGCCAGCACCGAATCCAGCAGGCCATCGCCA    |
| query    | GGGACACGCGCTGTACGGCTTCGGCCACCGCCAGCACCGAATCCAGCAGGCCATCGCCA    |
| template | TCCCCACCGCCGTATGGCGATGATTTTATCTTCAGCAGCCA                      |
| query    | TCCCCACCGCCGTATGGCGATGATTTTATCTTCAGCAGCCA                      |
| template | GCACCAGGGTGGTGACAA                                             |
| query    | GCACCAGGGTGGAGAC                                               |
| template | GGCCCCAGCGCACCAGCGGCCACCCCCAGCAGAGGGCAAAGGGGACCATCAGCCAGG      |
| query    | GGCCCCAGCGCACCAGCGGCCACCCCCAGCAGCAGGGCAAAGGGGACCATCAGCCAGG     |
| template | TGAACATGGTGTTAAAGAACGGCTCCCCACCGAAATGCTGCCCAGCCCCAGCTGTTTGT    |
| query    | TGAACATGGTGTTAAAGAACGGCTCCCCACCGAAATGCTGCCCAGCCCCAGCTGTTTGT    |
| template | GCACCAGCGGCAGCAGGGTGCCCAGCAGCACCACCAGCATGGCGGCCATCAGCAGGACGT   |
| query    | GCACCAGCGGCAGCAGGGTGCCCAGCAGCACCACCAGCATGGCGGCCATCAGCAGGACGT   |
| template | TGTTGCCGAGCAGCAGCGACTCGCGCACCACAGCGCGTTGTTTACCCGCGAACGCACCC    |
| query    | TGTTGCCGAGCAGCAGCGACTCGCGCACCACAGCGCGTTGTTTACCCGCGAACGCACCC    |
| template | TGTGCCCGCGCACGGCGAACAGCAGCAGCGAGCCGCCGGTGACCAGCACCATAAAGGCCA   |
| query    | TGTGCCCGCGCACGGCGAACAGCAGCAGCGAGCCGCCGGTGACCAGCACCATAAAGGCCA   |
| template | GGATAAACAT                                                     |
| query    | GGATAAACAT                                                     |
| template | AGCGCACCAGGAAGGTGCCCAGCAGGCACAGCGAGAAGGCGCAGATGGACAGCAGCAGCG   |
| query    | AGCGCACCAGGAAGGTGCCCAGCAGGCACAGCGAGAAGGCGCAGATGGACAGCAGCAGCG   |
| template | TCCACGCCTTAAAGCCGCGCGCTGTTCT                                   |
| query    | TCCACGCCTTAAAGCCGCGCGCTGTTCT                                   |
| template | CCGCCAGCCACGGCATAAAGGAGGCGTTCTCCACCGGGTCCCAGAACCACCAGCCGCCCC   |
| query    | CCGCCAGCCACGGCATAAAGGAGGCGTTCTCCACCGGGTCCCAGAACCACCAGCCGCCCC   |
| template | AGCCCAGCTCGTAGTAGGCCACGCCGAGCCGAGCACGATGCCCAGCGTCAGGAACACCC    |
| query    | AGCCCAGCTCGTAGTAGGCCACGCCGAGCCGAGCACGATGCCCAGCGTCAGGAACACCC    |
| template | ACGCCGCCAGCGTCCACGGGCGGGCAAACGGGTGAACGCGCTGTCCAGACGCCCGCTCA    |
| query    | ACGCCGCCAGCGTCCACGGGCGGGCAAACGGGTGAACGCGCTGTCCAGACGCCCGCTCA    |
| template | GCAGCGCGGGATGGCGAAGGCGAAGGCCACCGAGAAGCCGACATAGCCCATGTACAGCA    |
| query    | GCAGCGCGGGATGGCGAAGGCGAAGGCCACCGAGAAGCCGACATAGCCCATGTACAGCA    |
| template | GCGGCGGGTGAAAAATCAGCCCCGGGTCTGCAGCAGCGGGTTCAGGTCGCGCCCCCTCA    |
| query    | GCGGCGGGTGAAAAATCAGCCCCGGGTCTGCAGCAGCGGGTTCAGGTCGCGCCCCCTCA    |
| template | CCGGAAGGCCGGCAGCGTGCGGGCGAACGGGCCGGAGGTGAACAGGATGAACGCCAGAA    |
| query    | CCGGAAGGCCGGCAGCGTGCGGGCGAACGGGCCGGAGGTGAACAGGATGAACGCCAGAA    |
| template | AACGGGCGCAGACCATCCCCATCACCGCCAGCACCCGGGCGACGATATCCGCGGCACCT    |
| query    | AACGGGCGCAGACCATCCCCATCACCGCCAGCACCCGGGCGACGATATCCGCGGCACCT    |
| template | GCCGGCTGAACACCGCCACCGCAGGGTCCAGCCGCTCATCAGCAGCACCCACAGCAGCA    |
| query    | GCCGGCTGAACACCGCCACCGCAGGGTCCAGCCGCTCATCAGCAGCACCCACAGCAGCA    |
| template | GCGAGCCCTCGTGCGCCCCCCAGGTGGCGGCCACCG                           |
| query    | GCGAGCCCTCGTGCGCCCCCCAGGTGGCGGCCACCG                           |
| template | TCGAGTTGCCGGCGACATAGGCCACGGTGAAGTCGTTAACACAAAGGCGTGACCCAGCA    |
| query    | TCGAGTTGCCGGCGACATAGGCCACGGTGAAGTCGTTAACACAAAGGCGTGACCCAGCA    |
| template | CGAAAAACGCGCCCGCCACGCAGATAAACAGCAGCCAGGCGAACACCCCGGCCGACGCCA   |
| query    | CGAAAAACGCGCCCGCCACGCAGATAAACAGCAGCCAGGCGAACACCCCGGCCGACGCCA   |
| template | TCATCCGCGCGT                                                   |

|          |                                                              |
|----------|--------------------------------------------------------------|
| query    | TCATCCGCGCGTCAACCGCGCGCCAGCGCCACAGCGGGTAAACGGACAGCAGCAGCGCCA |
| template | CGCCGAGCGCCAGGCACAGCAGCGCGTGGCCGTATTAGGCATCATGATGAGGTGTCTT   |
| query    | CGCCGAGCGCCAGGCACAGCAGCGCGTGGCCGTATTAGGCATCATGATGAGGTGTCTT   |
| template | ATCAACGCGTTGCGGGCGGCGGTGGTTTTCTGCATCGCCTTTTCCACTTCCGGCGGGT   |
| query    | ATCAACGCGTTGCGGGCGGCGGTGGTTTTCTGCATCGCCTTTTCCACTTCCGGCGGGT   |
| template | GTAGTTCTCGTCATGCTTGCCAGCACCTCGTGCGCCAGGACGTGGTTGCCCTTCTCCAG  |
| query    | GTAGTTCTCGTCATGCTTGCCAGCACCTCGTGCGCCAGGACGTGGTTGCCCTTCTCCAG  |
| template | GGTGCCCTGCACCACCACCCCTGCCCTCGCGGAACAGGTCCGGCAGTATCCCTCATA    |
| query    | GGTGCCCTGCACCACCACCCCTGCCCTCGCGGAACAGGTCCGGCAGTATCCCTCATA    |
| template | GCTCACCGTCACCGACCCCTTCGGCGTCGTAGAGGCTGAAGTTACCTTCAGCGAGTCCGG |
| query    | GCTCACCGTCACCGACCCCTTCGGCGTCGTAGAGACTGAAGTTACCTTCAGCGAGTCCGG |
| template | GTGCGCCTGACGCTGCCGGGCATCACCATCCCGCCGACGCGCAGGCGCTGGCCCACCGC  |
| query    | GTGCGCCTGACGCTGCCGGGCATCACCATCCCGCCGACGCGCAGGCGCTGGCCCACCGC  |
| template | CGGCAGCTGCTGCGTCTCGCGTTGCCGTAGAGAAATTCGCCGGGGTATAGAACAGGTC   |
| query    | CGGCAGCTGCTGCGTCTCGCGTTGCCGTAGAGAAATTCGCCGGGGTATAGAACAGGTC   |
| template | GATATTCGCGCGCAGCGGTACAGGACCAGGCGGTGGTCAGCGCCAGGCCGCCAGCAC    |
| query    | GATATTCGCGCGCAGCGGTACAGGACCAGGCGGTGGTCAGCGCCAGGCCGCCAGCAC    |
| template | CGCGCAGACCACCCATAGCCGGTTTTTACGTCGCAGGTTAC                    |
| query    | CGCGCAGACCACCCATAGCCGGTTTTTACGTCGCAGGTTAC                    |

### ***SPI-13\_AY956832***

|          |                                                              |
|----------|--------------------------------------------------------------|
| template | AAATATCGGGCATATTGCCCTCCTGTAAACCTCACTATGCCCTCGCTGGTTTCATTCTT  |
| query    | AAATATCGGGCATATTGCCCTCCTGTAAACCTCACTATGCCCTCGCTGGTTTCATTCTT  |
| template | CCAATATATGATGGTGCCATTCTTAATTGCTTTTGGAGATGAGGATGGAAGTGCGCCATA |
| query    | CCAATATATGATGGTGCCATTCTTAATTGCTTTTGGAGATGAGGATGGAAGTGCGCCATA |
| template | TTGCTATTTTCTCGCCGTGCTGAAGAGCGGCATTTACGCGGGCTGCGACAAAATTAG    |
| query    | TTGCTATTTTCTCGCCGTGCTGAAGAGCGGCATTTACGCGGGCTGCGACAAAATTAG    |
| template | GCATAGGTCAGCCGCCGCTAAGCCAACAGATTAAGGATCTGGAAAGAGAGCTGGGAGCGC |
| query    | GCATAGGTCAGCCGCCGCTAAGCCAACAGATTAAGGATCTGGAAAGAGAGCTGGGAGCGC |
| template | AGCTATTCGGAGAGTGCCTCATGGCGCGGAATTAACCGAGGCTGGAAAAGCATTTTATG  |
| query    | AGCTATTCGGAGAGTGCCTCATGGCGCGGAATTAACCGAGGCTGGAAAAGCATTTTATG  |
| template | ATGTTGTTAAAGGGATGCCTGCTACCGCGACAAGAGCC                       |
| query    | ATGTTGTTAAAGGGATGCCTGCTACCGCGACAAGAGCC                       |

### ***SPI-13\_AY956833***

|          |                                                              |
|----------|--------------------------------------------------------------|
| template | CCTGCAAATCGTGGATAGTCTTATCATGATGGCTGGTTCTGATACTCGCCTTATTGGCAT |
| query    | CCTGCAAATCGTGGATAGTCTTATCATGATGGCTGGTTCTGATACTCGCCTTATTGGCAT |
| template | TATTGAGTCAGTTGTTGGGCTTAATGCCGTAGAGTCTATTGCGGACGCCACCCCAGACT  |
| query    | TATTGAGTCAGTTGTTGGGCTTAATGCCGTAGAGTCTATTGCGGACGCCACCCCAGACT  |
| template | CTGCGGGTTGATGTTTGGCGCCGAGATATGGCGGTGACATTGGCGCCACACCCGCCTG   |
| query    | CTGCGGGTTGATGTTTGGCGCCGAGATATGGCGGTGACATTGGCGCCACACCCGCCTG   |
| template | GGAGCCTCTTGCGCTGGCGCGGGCCAGAATAGTGGCTGCCTGCGCTATGAAAGGGCTTCT |
| query    | GGAGCCTCTTGCGCTGGCGCGGGCCAGAATAGTGGCTGCCTGCGCTATGAAAGGGCTTCT |
| template | TGCAATAGATGCTCCCTCTTTTGATATAGGCGATTTTTAGGTCTGAAAGAGGAAACGCT  |
| query    | TGCAATAGATGCTCCCTCTTTTGATATAGGCGATTTTTAGGTCTGAAAGAGGAAACGCT  |

|          |                                                                                                                       |
|----------|-----------------------------------------------------------------------------------------------------------------------|
| template | G C A G G C G C T C A G T T T T G G T T T T T C T G C A A A A T C G G C T A T T C A C C C G C T C A G A T T A G T G T |
| query    | G C A G G C G C T C A G T T T T G G T T T T T C T G C A A A A T C G G C T A T T C A C C C G C T A G A T T A G T G T   |
| template | A A T C A A C G C C G C A T T T A C T C C T A C A A C G G C A G A A T T A A T C A T G                                 |
| query    | A A T C A A C G C C G C A T T T A C T C C T A C A A C G G C A G A A T T A A T C A T G                                 |

**SPI-13\_AY956834**

|          |                                                                                                                         |
|----------|-------------------------------------------------------------------------------------------------------------------------|
| template | A G A T G G G G G T C G G C G C A T T A C C G G A G C T C A T C T G T A A T G C G C T C A A G G A A C A T A A T G A T C |
| query    | A G A T G G G G G T C G G C G C A T T A C C G G A G C T C A T C T G T A A T G C G C T C A A G G A A C A T A A T G A T C |
| template | T G G G G T C C A T A C A G A G G C G T G A A T C C G G G T T G G T A A G T T T G A T T C A A C A A G G C G T C G       |
| query    | T G G G G T C C A T A C A G A G G C G T G A A T C C G G G T T G G T A A G T T T G A T T C A A C A A G G C G T C G       |
| template | T T A C C A A T C A G C G T A A A A T A T C G A C C G G G A A T G T C T G T A T T T A C T T T T G C T A T G G G A C     |
| query    | T T A C C A A T C A G C G T A A A A T A T C G A C C G G G A A T G T C T G T A T T T A C T T T T G C T A T G G G A C     |
| template | A A A A G G A T A T G T A T G A C T A T C T A A C G A C A A C C C C T C T T T T T T A G T C G G C C T G T C G A T T     |
| query    | A A A A G G A T A T G T A T G A C T A T C T A A C G A C A A C C C C T C T T T T T T A G T C G G C C T G T C G A T T     |
| template | A T G T T A A C G A T C C G G G G A T C A T T G C G C A A A A T G A G A A T G T T G T C T C C A T T A A C G C T A C C T |
| query    | A T G T T A A C G A T C C G G G G A T C A T T G C G C A A A A T G A G A A T G T T G T C T C C A T T A A C G C T A C C T |
| template | T A C A A A T C G A T C T C A C T G G T G C C T G T A A C T C T G A A T A T T T G                                       |
| query    | T A C A A A T C G A T C T C A C T G G T G C C T G T A A C T C T G A A T A T T T G                                       |

**SPI-14\_AY956835**

|          |                                                                                                                         |
|----------|-------------------------------------------------------------------------------------------------------------------------|
| template | G C T T T A G T T T G T G T A A A C A A G T T G T C G A T C A T A A C G T T A G A A T T A G A A T A A A G C G A G A T   |
| query    | G C T T T A G T T T G T G T A A A C A A G T T G T C G A T C A T A A C G T T A G A A T T A G A A T A A A G C G A G A T   |
| template | C A T T C T G A T G T T G A T A T T T C T G A T T C A A A A C T C A G T A T C A A T C C A T T T G A T G A A A T T G C A |
| query    | C A T T C T G A T G T T G A T A T T T C T G A T T C A A A A C T C A G T A T C A A T C C A T T T G A T G A A A T T G C A |
| template | G T T G A A G A A G C A G T A C G T T T A A A A G A A C G G G G A T T A A T C A G T G A G G T T G T T G A T G T C T     |
| query    | G T T G A A G A A G C A G T A C G T T T A A A A G A A C G G G G A T T A A T C A G T G A G G T T G T T G A T G T C T     |
| template | A T A G G A A A C A C A G G T G T A G G G G A T G T A T T G C G T A C A G C A C T G G C A G C A G G G G C A G A C A G G |
| query    | A T A G G A A A C A C A G G T G T A G G G G A T G T A T T G C G T A C A G C A C T G G C A G C A G G G G C A G A C A G G |
| template | G C A A T A C A C A T A T T A A C A A A A A C T C T C T T A C A C C A C T A A T T G T G G C C A A A A C T A T C A C C   |
| query    | G C A A T A C A C A T A T T A A C A A A A A C T C T C T T A C A C C A C T A A T T G T G G C C A A A A C T A T C A C C   |
| template | G C T A T T A C C C G A A T G A A A A A C C G A T A T T A T A T T A T T A G G C A A G C A A G C T A T T G A C G A T     |
| query    | G C T A T T A C C C G A A T G A A A A A C C G A T A T T A T A T T A T T A G G C A A G C A A G C T A T T G A C G A T     |
| template | G A T T G T A A T C A G G T A G G C C A A A T G C T G G C A G C A T T A C T C G A T C T T C C C C A A G C C A C T A A T |
| query    | G A T T G T A A T C A G G T A G G C C A A A T G C T G G C A G C A T T A C T C G A T C T T C C C C A A G C C A C T A A T |
| template | G T T A G T G A A A T T A C T A T T T C T G A T A A T T C A T T A A C T G C T G T T C G T G A G G T T G A T G G A G G A |
| query    | G T T A G T G A A A T T A C T A T T T C T G A T A A T T C A T T A A C T G C T G T T C G T G A G G T T G A T G G A G G A |
| template | T T A G A A A C G T T A A A T T T A T C C                                                                               |
| query    | T T A G A A A C G T T A A A T T T A T C C                                                                               |

**SPI-14\_AY956836**

|          |                                                                                                                         |
|----------|-------------------------------------------------------------------------------------------------------------------------|
| template | C G T T A T C C T C T G C T G G T G A A A T A T T T A A A C A C C A C G C C A G C C T A T T G T G A A T C A G A T G G   |
| query    | C G T T A T C C T C T G C T G G T G A A A C A T T T A A A C A C C A C G C C A G C C T A T T G T G A A T C A G A T G G   |
| template | A A A T G T T A C G T A G C G A T A T G C A G G A G C A T G T T A A A G G C A T C A A A G G A C A T G T C A G A A T A T |
| query    | A A A T G T T A C G T A G C G A T A T G C A G G A G C A T G T T A A A G G C A T C A A A G G A C A T G T C A G A A T A T |
| template | T T T C C A G T A T A A C T G C T A T T G C A G A G T A T C T C C C C C A T T G T T G A G C C A T T T C C T T A C A C   |

|          |                                                               |
|----------|---------------------------------------------------------------|
| query    | TTTCCAGTATAAAGTCTATTGCAGAGTATCTCCCCCATTTGTTAAGCCATTTTCCTTACAC |
| template | TATATAACGATGTGAATATTGATCTCAGGGAGTATCCAAGTCCGGAAATTGTACGTTCTG  |
| query    | TATATAACGATGTGAATATTGATCTCAGGGAGTATCCAAGTCCGGAAATTGTACGTTCTG  |
| template | TTATTGAGGGGAAAACTGATCTCGGAATTGTTGCTGGTAATTACAACAGATAATCTTG    |
| query    | TTATTGAGGGGAAAACTGATCTCGGAATTGTTGCTGGTAATTACAACAGATAATCTTG    |
| template | AAATACTGCCGTTCCGTACTGATAGGCTAGTGCTTATCACCGCGACAGACCATCCCTTTG  |
| query    | AAATACTGCCGTTCCGTACTGATAGGCTAGTGCTTATCACCGCGACAGACCATCCCTTTG  |
| template | CTGACAGAAAAAGCGTGACCTTTTCATGAATTAATTCAATATGAACAAATCAGCCTGCCTG |
| query    | CTGACAGAAAAAGCGTGACCTTTTCATGAATTAATTCAATATGAACAAATCAGCCTGCCTG |
| template | AAGGGACAGGAATGTTTGAAT                                         |
| query    | AAGGGACAGGAATGTTTGAAT                                         |

***SPI-2\_AY956826***

|          |                                                              |
|----------|--------------------------------------------------------------|
| template | GAAAAGCAATTACGCGGCAAGCTTACCGTACTTGATCAGCAGCAACAGGCGATT       |
| query    | GAAAAGCAATTACGCGGCAAGCTTACCGTACTTGATCAGCAGCAACAGGCGATT       |
| template | GAACAGCAGATTTGCCAGACGCGCGCTTAGCAGTGCTACCAGACTGAAAGAATTAAT    |
| query    | GAACAGCAGATTTGCCAGACGCGCGCTTAGCAGTGCTACCAGACTGAAAGAATTAAT    |
| template | GGCTGGCAAGGTACGTTATCTTGTCATTTATTGTTGGATAAGAAACAACAAATGGCCGGG |
| query    | GGCTGGCAAGGTACGTTATCTTGTCATTTATTGTTGGATAAGAAACAACAAATGGCCGGG |
| template | TTATTTACTCAGGCGCAGAGCTTTTTGACGCAACGGCAGCAGTTAGAGAATCAGTATCAG |
| query    | TTATTTACTCAGGCGCAGAGCTTTTTGACGCAACGGCAGCAGTTAGAGAATCAGTATCAG |
| template | CAGCTTGCTCCCCGGCGAAGCGAATTACAGAAGAATTTTAATGCGCTTATGAAAAAGAAA |
| query    | CAGCTTGCTCCCCGGCGAAGCGAATTACAGAAGAATTTTAATGCGCTTATGAAAAAGAAA |
| template | GAAAAAATTACTATGGTATTAAGCGATGCGTATTACCAAAGTTGAGGGGAAGCTTGGGGT |
| query    | GAAAAAATTACTATGGTATTAAGCGATGCGTATTACCAAAGTTGAGGGGAAGCTTGGGGT |
| template | GCCATGCCAGTCTTATCAGGATGATAACGAGGCGGAGGCGGAACGTATGGACTTTGAACA |
| query    | GCCATGCCAGTCTTATCAGGATGATAACGAGGCGGAGGCGGAACGTATGGACTTTGAACA |
| template | ACTCATGCACCAGGCATTACCCATTGGTGAGAATAATCCTCCTGCAGCATTGAATAAGAA |
| query    | ACTCATGCACCAGGCATTACCCATTGGTGAGAATAATCCTCCTGCAGCATTGAATAAGAA |
| template | CGTGGTTTTACGCAACGTTATCGTGTTAGTGGCGGTTATCTTGACGGTGTAGAGTGTGA  |
| query    | CGTGGTTTTACGCAACGTTATCGTGTTAGTGGCGGTTATCTTGACGGTGTAGAGTGTGA  |
| template | AGTCTGTGAATCAGGGGGGCTAATTCAGTTAAGAATCAATGTCCTCATCATGAAATTTA  |
| query    | AGTCTGTGAATCAGGGGGGCTAATTCAGTTAAGAATCAATGTCCTCATCATGAAATTTA  |
| template | CCGTTTCGATGAAAGCGCTAAAGCAGTGGCTGGAGTCT                       |
| query    | CCGTTTCGATGAAAGCGCTAAAGCAGTGGCTGGAGTCT                       |

***SPI-2\_AY956827***

|          |                                                              |
|----------|--------------------------------------------------------------|
| template | AGGATATGCTTAGTGGAATCATTGCTAAAACTGAAGTTATTAGCGACGATGTTTCGACGG |
| query    | AGGATATGCTTAGTGGAATCATTGCTAAAACTGAAGTTATTAGCGACGATGTTTCGACGG |
| template | TTGCTGCTGGAATCATGTTTGCGGGCGTTAACCATAGCCTGATTTCCAGGTACATGCG   |
| query    | TTGCTGCTGGAATCATGTTTGCGGGCGTTAACCATAGCCTGATTTCCAGGTACATGCG   |
| template | ATGTTACCAGCGCTAACGGTTATTGTTCCGGATAAAAAATTACAGTTGGTATGCTGGCA  |
| query    | ATGTTACCAGCGCTAACGGTTATTGTTCCGGATAAAAAATTACAGTTGGTATGCTGGCA  |
| template | TTATTGTTGGCGGGTTTAAATGAGCCGCTAAAAGCCGCGAAAAATTTATCGGATATAGAT |
| query    | TTATTGTTGGCGGGTTTAAATGAGCCGCTAAAAGCCGCGAAAAATTTATCGGATATAGAT |



|                |                                                               |
|----------------|---------------------------------------------------------------|
| template query | TTGCCAGAGGCTATGGCGCTGCGTCTGTTATTTCTGCACCAAATGAGGGGTTTGAAAAT   |
| template query | TGAATATTTCTGATATGAGCGTAGTGCCTGTAAGCACTCAATCTTATGTAAAGTCTCTG   |
| template query | CAGAACCGAGCCAGGAGCAAATTAATTTTTTTGAACAATTGCTGAAAGATGAAGCATCCA  |
| template query | CCAGTAACGCCAGTGCTTTATTACCGCAGGTTATGTTGACCAGACAAATGGATTATATGC  |
| template query | AGTTAACGGTAGGCGTCGATTATCTTGCCAGAATATCAGGCGCAGCATCGCAAGCGCTTA  |
| template query | ATAAGCTGGATAACATGGCATGAAGGTTTCATCGTATAGTATTTCTTACTGTCCTTACGTT |
| template query | CTTTCTTACGGCATGTGATGTGGATCTTTATCGCTCATTGCC                    |

**SPI-2\_AY956828**

|                |                                                             |
|----------------|-------------------------------------------------------------|
| template query | GAGTGAGGCTGTTCACTTATAGCGTACTGTCAATCGGAGATGGTTTATGTGGGCAAAT  |
| template query | TCCATCGCTGCTGATTTCCTTAGCGCGGGAATTATTGTACCCCGTGCCGGGTGAGAA   |
| template query | ACGCCAGAACCTGGCGACAGAGTTGAGTTCTCAAATTGCCAGACAACTCAGTCGCTCAT |
| template query | ATTAACCGCTGTGGTTTTAATGCTCCTCGCTTAAATCCTGGCTTTCCTTTATCACTCT  |
| template query | CGCTTCTTTTCAGCGTTGTTAGCATTGCCAATTATCCTCATTGCGCGCAAAAAGTCTGT |
| template query | GGTTTCCGCAAATGGCGTCGAAGCACCGGAAAAAGATAGTATGGTTCCCGGCATGTCC  |
| template query | TCTAATCTTACGTCTTAGCCCCACGTTACATTCTGG                        |

**SPI-2\_AY956829**

|                |                                                              |
|----------------|--------------------------------------------------------------|
| template query | AGTTGGCGTGCCCATATTGCATTGGCTGGCACCTGGATGATGCTTAAAGAATACACGACG |
| template query | GCCATTAATTTCTATGGACATGCCTTGATGCTGGATGCCAGCCATCCAGAACCGGTTTAC |
| template query | CAAACGGGCGTCTGTCTAAAATGATGGGGGAACCCGGGTTGGCGAGAGAGGCTTTTCAA  |
| template query | ACCGCAATCAAGATGAGTTATGCGGATGCCTCATGGAGTGAGATTCGCCAGAATGCGCAA |
| template query | ATAATGGTTGATACTCTTATTGCTTAAATAACAGAACGAAATATGAAAATTCATATTCCG |
| template query | TCAGCGGCAAGTAATATAGTCGATGGTAATAGTCCTCCTTCCGATATACAAGCGAAGGAG |
| template       | GTATCGTTTCTCCCCCTGAAATTCCAGCGCCTGGTACCCCGCAGCCCTGTGCTGCTT    |

query GTATCGTTTCCTCCCCCTGAAATTCAGCGCCTGGACACCCCGCAGCCCTGTGCTGCTT

template ACGCC  
query ACGCC

### SPI-2\_AY956830

template ACATGTCCCTCTCTATTTTCATACCGACAGTATCCGTTTACGGCAAATTTTGTTAATTT  
query ACATGTCCCTCTCTATTTTCATACCGACAGTATCCGTTTACGGCAAATTTTGTTAATTT

template ACTCGGGAAATGCGGTAAAAATTTACCGAAACCGAGGGATACGTCTGACGGTCAAGCGTCA  
query ACTCGGGAAACGCGGTAAAAATTTACCGAAACCGAGGGATACGTCTGACGGTCAAGCGTCA

template TGAGGAACAATTAATATTTCTGGTTAGCGATAGCGGTAAAGGGATTGAAATACAGCAGCA  
query TGAGGAACAATTAATATTTCTGGTTAGCGATAGCGGTAAAGGGATTGAAATACAGCAGCA

template GTCTCAAATCTTTACTGCTTTTATCAAGCAGACACAAATTCGCAAGGTACAGGAATTGG  
query GTCTCAAATCTTTACTGCTTTTATCAAGCAGACACAAATTCGCAAGGTACAGGAATTGG

template ACTGACTATTGCGTCAAGCCTGGCTAAAATGATGGGCGGTAATCTGACACTAAAAAGTGT  
query ACTGACTATTGCGTCAAGCCTGGCTAAAATGATGGGCGGTAATCTGACACTAAAAAGTGT

template CCCCGGGGTTGGAACCTGTGTCTCGCTAGTATTACCCTTACAAGAATACCAGCCGCCTCA  
query CCCCGGGGTTGGAACCTGTGTCTCGCTAGTATTACCCTTACAAGAATACCAGCCGCCTCA

template ACCAATTAAAGGGACGCTGTCAGCGCCGTTCTGCCTGCATCGGCAACTGGCTTGCTGGGG  
query ACCAATTAAAGGGACGCTGTCAGCGCCGTTCTGCCTGCATCGGCAACTGGCTTGCTGGGG

template AATACGCGGTGAACCACCCACCAGCAAATGCGCTTCTCAACGCAGAGCTTTTGTATTT  
query AATACGCGGTGAACCACCCACCAGCAAATGCGCTTCTCAACGCAGAGCTTTTGTATTT

template CTCCGAAAAACTCTACGACCTGGCGCAACAGTTAATATTGTGTACACCAAATATGCCAGT  
query CTCCGAAAAACTCTACGACCTGGCGCAACAGTTAATATTGTGTACACCAAATATGCCAGT

template AATAAAT  
query AATAAAT

### SPI-2\_JN673272

template ATGCTGGCAGTTTTAAAAGGCATTCCATTAATT CAGGATATCAGGGCCGAAGGTAATAGC  
query ATGCTGGCAGTTTTAAAAGGCATTCCATTAATT CAGGATATCAGGGCCGAAGGTAATAGC

template CGATCCTGGATAATGACTATTGATGGGCATCCTGCCAGAGGAGAAATTTCTCAGAAGCA  
query CGATCCTGGATAATGACTATTGATGGGCATCCTGCCAGAGGAGAAATTTCTCAGAAGCA

template TTTTCTATTTCTTTGTTCTTAAATGACCTGGAAAGCTTACCTAAGCCTTGCTTGCCTAT  
query TTTTCTATTTCTTTGTTCTTAAATGACCTGGAAAGCTTACCTAAGCCTTGCTTGCCTAT

template GTGACACTACTGCTTGACGACACCCGGACGTCCATGATTATGCTATACAGCTCACAGCG  
query GTGACACTACTGCTTGACGACACCCGGACGTCCATGATTATGCTATACAGCTCACAGCG

template GATGGGGGATGGTTAAACGGTTATTATACCACAAGTAGTAGCTCTGAGCTTATTGCTATT  
query GATGGGGGATGGTTAAACGGTTATTATACCACAAGTAGTAGCTCTGAGCTTATTGCTATT

template GAGATAGAAAAACACCTGGCTTTAACTTGCATTTTAAAAAATGTAATACGCAATCACCAT  
query GAGATAGAAAAACACCTGGCTTTAACTTGCATTTTAAAAAATGTAATACGCAATCACCAT

template AAACTTTATTCGGGTGGGGTATAA  
query AAACTTTATTCGGGTGGGGTATAA

### SPI-2\_Z95891

template TTACAAAACCAAGTGACATTGGCTACCTTAGCTCGCTACATCAGTATTGCCGCAGAATACC  
query TTACAAAACCAAGTGACATTGGCTACCTTAGCTCGCTACATCAGTATTGCCGCAGAATACC

|          |                                                               |
|----------|---------------------------------------------------------------|
| template | AACTTTACGAAATATAGAGCTACAGGAGCAGGATCCGAGTCGCTGCTCAGCGCTACTGG   |
| query    | AACTTTACGAAATATAGAGCTACAGGAGCAGGATCCGAGTCGCTGCTCAGCGCTACTGG   |
|          |                                                               |
| template | CGACAGATGATATGGTCATTAATAGCAAGATTTTCCAATCACTGGACCTCTTGCTGGCTG  |
| query    | CGACAGATGATATGGTCATTAATAGCAAGATTTTCCAATCACTGGACCTCTTGCTGGCTG  |
|          |                                                               |
| template | ATATTGAAAAATGCCGTATCGGCTGGAGAAAAATCGATCAGTTAATTCACACATTAAAAG  |
| query    | ATATTGAAAAATGCCGTATCGGCTGGAGAAAAATCGATCAGTTAATTCACACATTAAAAG  |
|          |                                                               |
| template | GCTGTTTAGGTCAAATAGGGCAGACTGAATTGGTATGCTATGTCATAGACATTGAGAATC  |
| query    | GCTGTTTAGGTCAAATAGGGCAGACTGAATTGGTATGCTATGTCATAGACATTGAGAATC  |
|          |                                                               |
| template | GCGTAAAAATGGGAAAAATCATCGCGCTGGAGGAACTAACCGACTTACGCCAGAAAATAC  |
| query    | GCGTAAAAATGGGAAAAATCATCGCGCTGGAGGAACTAACCGACTTACGCCAGAAAATAC  |
|          |                                                               |
| template | GTATGATCTTCAAAAACACACCATTACTTAATATTATCTTAATTTTCGCGAGGGCAGCA   |
| query    | GTATGATCTTCAAAAACACACCATTACTTAATATTATCTTAATTTTCGCGAGGGCAGCA   |
|          |                                                               |
| template | AAATGAAAGAATATAAGATCTTATTAGTAGACGATCATGAAATCATCATTAAACGGCATT  |
| query    | AAATGAAAGAATATAAGATCTTATTAGTAGACGATCATGAAATCATCATTAAACGGCATT  |
|          |                                                               |
| template | TGAATGCCTTATTACCCTGGCCTCATTTTAAAAATTGTAGAGCATGTTAAAAATGGTCTTG |
| query    | TGAATGCCTTATTACCCTGGCCTCATTTTAAAAATTGTAGAGCATGTTAAAAATGGTCTTG |
|          |                                                               |
| template | AGGTTTATAATGCCTGTTGTGCATACGAGCCTGACATACTTATCCTTGATCTTAGTCTAC  |
| query    | AGGTTTATAATGCCTGTTGTGCATACGAGCCTGACATACTTATCCTTGATCTTAGTCTAC  |
|          |                                                               |
| template | CTGGCATCAATGGCCTGGATATCATTCTCAATTACATCAGCGTTGGCCAGCAATGAATA   |
| query    | CTGGCATCAATGGCCTGGATATCATTCTCAATTACATCAGCGTTGGCCAGCAATGAATA   |
|          |                                                               |
| template | TTCTGGTTTACACAGCATACCAACAAGAGTATATGACCATTAAAACTTTAGCCGCAAGTG  |
| query    | TTCTGGTTTACACAGCATACCAACAAGAGTATATGACCATTAAAACTTTAGCCGCAAGTG  |
|          |                                                               |
| template | CTAATGGCTATGTTTTAAAAAGCAGTAGTCAGCAAGTTCTGTTAGCGGCATTGCAAACAG  |
| query    | CTAATGGCTATGTTTTAAAAAGCAGTAGTCAGCAAGTTCTGTTAGCGGCATTGCAAACAG  |
|          |                                                               |
| template | TAGCAGTAAACAAGCGTTACATTGACCCAACGTTGAATCGGGAAGCTATCCTGGCTGAAT  |
| query    | TAGCAGTAAACAAGCGTTACATTGACCCAACGTTGAATCGGGAAGCTATCCTGGCTGAAT  |
|          |                                                               |
| template | TAAACGCTGACACGACCAATCATCAACTGCTTACTTTGCGCGAGCGTCAGGTTCTTAAAC  |
| query    | TAAACGCTGACACGACCAATCATCAACTGCTTACTTTGCGCGAGCGTCAGGTTCTTAAAC  |
|          |                                                               |
| template | TTATTGACGAGGGGTATACCAATCATGGGATCAGCGAAAAGCTACATATCAGTATAAAAA  |
| query    | TTATTGACGAGGGGTATACCAATCATGGGATCAGCGAAAAGCTACATATCAGTATAAAAA  |
|          |                                                               |
| template | CCGTCGAAACACACCGGATGAATATGATGAGAAAGCTACAGGTTCATAAAGTGACAGAGT  |
| query    | CCGTCGAAACACACCGGATGAATATGATGAGAAAGCTACAGGTTCATAAAGTGACAGAGT  |
|          |                                                               |
| template | TACTTAACTGTGCCGAAGAATGAGGTTAATAGAGTATTAACCAAGGGGCGTCCGATGGTA  |
| query    | TACTTAACTGTGCCGAAGAATGAGGTTAATAGAGTATTAACCAAGGGGCGTCCGATGGTA  |
|          |                                                               |
| template | TTAAGCATTGGTCATATTTTGATGAGCCTTACGCCACGCAGTATTGCTCATCATCGACAA  |
| query    | TTAAGCATTGGTCATATTTTGATGAGCCTTACGCCACGCAGTATTGCTCATCATCGACAA  |
|          |                                                               |
| template | AATCCATACGGATGCCCTGGTATGCCGCACCATTATCACTACCTTAGTCTTCATTTGAT   |
| query    | AATCCATACGGATGCCCTGGTATGCCGCACCATTATCACTACCTTAGTCTTCATTTGAT   |
|          |                                                               |
| template | CATGATATAGTAGAATCCCCTTATTTAACGGGCTTTACCATGTCGTATTCTA          |
| query    | CATGATATAGTAGAATCCCCTTATTTAACGGGCTTTACCATGTCGTATTCTA          |

***SPI-3\_AJ000509***

|          |                                                             |
|----------|-------------------------------------------------------------|
| template | ATGGGTTCACCAGAAAAGGGATGCTAAACGTCCTGATTGCCGCCGATTGTGGGGGAGT  |
| query    | ATGGGTTCACCAGAAAAGGGATGCTAAACGTCCTGATTGCCGCCGATTGTGGGGGAGT  |
|          |                                                             |
| template | TCAGGCGTTTGCGCGCAGTACATCATGGAGCAAAGCCGTATGTCGTACAGTTCTTGACG |
| query    | TCAGGCGTTTGCGCGCAGTACATCATGGAGCAAAGCCGTATGTCGTACAGTTCTTGACG |

|          |                                                                |
|----------|----------------------------------------------------------------|
| template | ATGATACGTTTGGTTATTTCGCCGGGCTGATACTGGTGACCTTCTCCTTTATGCACGGCGAT |
| query    | ATGATACGTTTGGTTATTTCGCCGGGCTGATACTGGTGACCTTCTCCTTTATGCACGGCGAT |
|          |                                                                |
| template | AAGATATTTTCAATTCTTAAAAACGCAAAAGATGCCCTGAGTCTGCTGATTTTCTCCGTG   |
| query    | AAGATATTTTCAATTCTTAAAAACGCAAAAGATGCCCTGAGTCTGCTGATTTTCTCCGTG   |
|          |                                                                |
| template | GTGGGCGCGCTCACCGTTCAAGTAACCTTCCTGCTCACGATTGAAAAATCCAATGCCGCC   |
| query    | GTGGGCGCGCTCACCGTTCAAGTAACCTTCCTGCTCACGATTGAAAAATCCAATGCCGCC   |
|          |                                                                |
| template | ACCGCGACAGTGCTGCAATTTTATCGCCGACCATTATTGTAGCGTGGTTGCATTAGCG     |
| query    | ACCGCGACAGTGCTGCAATTTTATCGCCGACCATTATTGTAGCGTGGTTGCATTAGCG     |
|          |                                                                |
| template | CGAAGAACACGACCAGGCATTCTGGTCTTAACCGCCATTCTTACATCGCTTATCGGCACC   |
| query    | CGAAGAACACGACCAGGCATTCTGGTCTTAACCGCCATTCTTACATCGCTTATCGGCACC   |
|          |                                                                |
| template | TTTTTACTGGTGACTCACGGCAATCCAACATCGCTGTCGATCTCTTCAGCCGCGCTGTT    |
| query    | TTTTTACTGGTGACTCACGGCAATCCAACATCGCTGTCGATCTCTTCAGCCGCGCTGTT    |
|          |                                                                |
| template | TGGGGTATCGCCTCCGCATTTGCCGCCGCTTTTATACGACCTGGCCTTCCAGGCTAATC    |
| query    | TGGGGTATCGCCTCCGCATTTGCCGCCGCTTTTATACGACCTGGCCTTCCAGGCTAATC    |
|          |                                                                |
| template | GCCCAATACGGCACACTGCCAGTGGTCGGCTGGAGTATGTCCTTTGGCGGCCTTATTCTG   |
| query    | GCCCAATACGGCACACTGCCAGTGGTCGGCTGGAGTATGTCCTTTGGCGGCCTTATTCTG   |
|          |                                                                |
| template | CTGCCCTTCTACGCTAAAGAAGGAACGCACCTTTCGGTGAGCGGCAGCCTGATTCTGGCC   |
| query    | CTGCCCTTCTACGCTAAAGAAGGAACGCACCTTTCGGTGAGCGGCAGCCTGATTCTGGCC   |
|          |                                                                |
| template | TTTTTCTACCTGGTGGTGATCGGTACATCGCTGACGTTACGCTGTATTTGAAAGGCGCG    |
| query    | TTTTTCTACCTGGTGGTGATCGGTACATCGCTGACGTTACGCTGTATTTGAAAGGCGCG    |
|          |                                                                |
| template | CAACTGATTGGTGGCCCC                                             |
| query    | CAACTGATTGGTGGCCCC                                             |

***SPI-3\_Y13864***

|          |                                                              |
|----------|--------------------------------------------------------------|
| template | AGCGGGAATGCCGAAAATATCGGTATAGAAGAACATCATATATAACATGACGTTATCAAA |
| query    | AGCGGGAATGCCGAAAATATCGGTATAGAAGAACATCATATATAACATGACGTTATCAAA |
|          |                                                              |
| template | GATGATGTGGCTGGCGGCATCGCCATACCATAGCCAATCTTCTCCTTAACGGAGAGAAT  |
| query    | GATGATGTGGCTGGCGGCATCGCCATACCATAGCCAATCTTCTCCTTAACGGAGAGAAT  |
|          |                                                              |
| template | TTCACTTTTCATTACGCATCCTTAACGCTCACAACGCTCACTAATACCGGTTACAGTTT  |
| query    | TTCACTTTTCATTACGCATCCTTAACGCTCACAACGCTCACTAATACCGGTTACAGTTT  |
|          |                                                              |
| template | TGTAACCTTCCCTGCGAGCGTGAATATTCCGTATTTGGTTATCAAATTACGATTCTTG   |
| query    | TGTAACCTTCCCTGCGAGCGTGAATATTCCGTATTTGGTTATCAAATTACGATTCTTG   |
|          |                                                              |
| template | TTTTCTGTGATCAGGGTAGCGTCAAAAAGTGTGATGAAATGTAACATAATGGATTTATGG |
| query    | TTTTCTGTGATCAGGGTAGCGTCAAAAAGTGTGATGAAATGTAACATAATGGATTTATGG |
|          |                                                              |
| template | GGGTTTATATGAAACCGATCATGGCAGAAGGAAAGGGAAGTTAAAAAGCACGGGAGGGG  |
| query    | GGGTTTATATGAAACCGATCATGGCAGAAGGAAAGGGAAGTTAAAAAGCACGGGAGGGG  |
|          |                                                              |
| template | ATGTGAAACGCCAGGAAGTAGCTATAATGCGCGCGCCTCCATGTAGCAATCGAGGCGCG  |
| query    | ATGTGAAACGCCAGGAAGTAGCTATAATGCGCGCGCCTCCATGTAGCAATCGAGGCGCG  |
|          |                                                              |
| template | GAAATCGTCGTCTCCGGTGAGGCGGCTGGACTTCAAATCCAGTTGGGGCCGCCAGCGGT  |
| query    | GAAATCGTCGTCTCCGGTGAGGCGGCTGGACTTCAAATCCAGTTGGGGCCGCCAGCGGT  |
|          |                                                              |
| template | CCCGGGCAGGTTTGACTCCTGTGATCTTCGCCAACATCCTTCTCTCATGCCACCATTC   |
| query    | CCCGGGCAGGTTTGACTCCTGTGATCTTCGCCAACATCCTTCTCTCATGCCACCATTC   |
|          |                                                              |
| template | GTCTCTATTTTCGGGACAAAGTATTTGCTTATTATTAAGACTAGTCTTGATATAATAC   |
| query    | GTCTCTATTTTCGGGACAAAGTATTTGCTTATTATTAAGACTAGTCTTGATATAATAC   |
|          |                                                              |
| template | GAAAGGAAAGGTGGATAGAGAAAGTGAATATTATTTTATTAATCACCATTACCGATTG   |
| query    | GAAAGGAAAGGTGGATAGAGAAAGTGAATATTATTTTATTAATCACCATTACCGATTG   |

|          |                                                                |
|----------|----------------------------------------------------------------|
| template | CTAAAACCGAACGTCCATTTATTGTGGGATATCGTCTGCAAAGAAGGGATAAAAAGTACGC  |
| query    | CTAAAACCGAACGTCCATTTATTGTGGGATATCGTCTGCAAAGAAGGGATAAAAAGTACGC  |
|          |                                                                |
| template | CAGGACTAACGCGGGCGGGACTTAACTAATCACCAAACGAAC TTGTGGGT CATACTTACA |
| query    | CAGGACTAACGCGGGCGGGACTTAACTAATCACCAAACGAAC TTGTGGGT CATACTTACA |
|          |                                                                |
| template | GGCTCATCCTTTCTCAAAAGAGATACGCTTACCAGGCCAAAATTATGAGATCAACGTATA   |
| query    | GGCTCATCCTTTCTCAAAAGAGATACGCTTACCAGGCCAAAATTATGAGATCAACGTATA   |
|          |                                                                |
| template | GAGCCATCCGGATAAAGATACATGCCTCCCTCCAGATACACGGGTCTCCTTCTTCTACC    |
| query    | GAGCCATCCGGATAAAGATACATGCCTCCCTCCAGATACACGGGTCTCCTTCTTCTACC    |
|          |                                                                |
| template | GCTAAATTATGATATAGCGATTGCATTTTCATCATCTGCAC TTTCTTCCGGTTGGTTTTCA |
| query    | GCTAAATTATGATATAGCGATTGCATTTTCATCATCTGCAC TTTCTTCCGGTTGGTTTTCA |
|          |                                                                |
| template | ACTCGATAATAGGTATCTACATCATAGTTCTGTTTACGGAGATCGTCGTCGCTGTATACG   |
| query    | ACTCGATAATAGGTATCTACATCATAGTTCTGTTTACGGAGATCGTCGTCGCTGTATACG   |
|          |                                                                |
| template | CCAAGCCGTTTTTTTAAGCCTGTTATATTAAATATCCATTTTAACCCATCTTTAATATAA   |
| query    | CCAAGCCGTTTTTTTAAGCCTGTTATATTAAATATCCATTTTAACCCATCTTTAATATAA   |
|          |                                                                |
| template | TAGGCATCACCATAAGCATTTTCATCGGGGCATTCTTTATAGCCCATCCGCAATGCAACA   |
| query    | TAGGCATCACCATAAGCATTTTCATCGGGGCATTCTTTATAGCCCATCCGCAATGCAACA   |
|          |                                                                |
| template | TCACAGCCATGCTTACCAACATATTTATAACTCATATCCCCCCAATATGTTGCTTCAAT    |
| query    | TCACAGCCATGCTTACCAACATATTTATAACTCATATCCCCCCAATATGTTGCTTCAAT    |
|          |                                                                |
| template | ATCCCAGATAAAAATTCATAACGAAAACCTATCCTGATAACCTATGCCACATGAAGGATAC  |
| query    | ATCCCAGATAAAAATTCATAACGAAAACCTATCCTGATAACCTATGCCACATGAAGGATAC  |
|          |                                                                |
| template | AATTTAAACTAAAGTACGCGTTATATTATCCCTTAAGTCCGTATCAAGTATGCGTATTCT   |
| query    | AATTTAAACTAAAGTACGCGTTATATTATCCCTTAAGTCCGTATCAAGTATGCGTATTCT   |
|          |                                                                |
| template | GTAGTAGGTAGTAATATGTTCTAATTTATTAATGTGAGTTATATATGAAGAGATTATTTA   |
| query    | GTAGTAGGTAGTAATATGTTCTAATTTATTAATGTGAGTTATATATGAAGAGATTATTTA   |
|          |                                                                |
| template | CAGCGATGATTATCGCTTTTATTACCGTCACGGCATCATCCAGTGCCTTGCTGCCCCAA    |
| query    | CAGCGATGATTATCGCTTTTATTACCGTCACGGCATCATCCAGTGCCTTGCTGCCCCAA    |
|          |                                                                |
| template | AGGGTCAACATCCACATGGGGGTACAGGCTCACATCATAAGGGTGGATGGTGTTCATACG   |
| query    | AGGGTCAACATCCACATGGGGGTACAGGCTCACATCATAAGGGTGGATGGTGTTCATACG   |
|          |                                                                |
| template | AGCAGTAACGTCGC                                                 |
| query    | AGCAGTAACGTCGC                                                 |

***SPI-4\_AJ576316***

|          |                                                               |
|----------|---------------------------------------------------------------|
| template | TATTGTCTTTGTATCCCTTTCAAAAAAGAGAAGCGCATATCTTACGGAAAAATGTCGCTT  |
| query    | TATTGTCTTTGTATCCCTTTCAAAAAAGAGAAGCGCATATCTTACGGAAAAATGTCGCTT  |
|          |                                                               |
| template | ATCGCCTCTGGCCGACTCGCCTCGGCACATCATTATCCAGCCGAAGTTCATAAATGTACT  |
| query    | ATCGCCTCTGGCCGACTCGCCTCGGCACATCATTATCCAGCCGAAGTTCATAAATGTACT  |
|          |                                                               |
| template | GCAATAACCCGGATTGTCTTAAATATGAAAGAGAAATCTCATCTGCAAAATATATAATT   |
| query    | GCAATAACCCGGATTGTCTTAAATATGAAAGAGAAATCTCATCTGCAAAATATATAATT   |
|          |                                                               |
| template | ATAGCCATTTTTTGACAACAAAAAGATATTATAAAATAACGGTAGAGAATGGTCGGTATT  |
| query    | ATAGCCATTTTTTGACAACAAAAAGATATTATAAAATAACGGTAGAGAATGGTCGGTATT  |
|          |                                                               |
| template | ATCAATGGTTAATTAAATGTTTGCTTTAGCTTGATGAGCTCAAATATGATATGTGTAT    |
| query    | ATCAATGGTTAATTAAATGTTTGCTTTAGCTTGATGAGCTCAAATATGATATGTGTAT    |
|          |                                                               |
| template | CTTGCTTTATTTTTAATTGCTGAAGATAAAAATTGTTACTTATAGCTGGCTTTATATAAAA |
| query    | CTTGCTTTATTTTTAATTGCTGAAGATAAAAATTGTTACTTATAGCTGGCTTTATATAAAA |
|          |                                                               |
| template | AATGGTTTTATTTGTGTATTTTTTACACAATTCTGATTTTTTACTCCCCACTTATTATA   |
| query    | AATGGTTTTATTTGTGTATTTTTTACACAATTCTGATTTTTTACTCCCCACTTATTATA   |

|          |                                                               |
|----------|---------------------------------------------------------------|
| template | TTTTCAATGATTTAAGTTATATTGAAGTCCATATGACCTATGTTTTAATGTGAAAAATT   |
| query    | TTTTCAATGATTTAAGTTATATTGAAGTCCATATGACCTATGTTTTAATGTGAAAAATT   |
| template | AATTTTATCCTCTGGAGGCAAATTTATTAATACGTATGGTTATAACGCGTATTA AAAAG  |
| query    | AATTTTATCCTCTGGAGGCAAATTTATTAATACGTATGGTTATAACGCGTATTA AAAAG  |
| template | AAATATGTCCTTAAAAATGATTAGAGTTTCAATGATTAGCTAACAAATCTATTTATCGGC  |
| query    | AAATATGTCCTTAAAAATGATTAGAGTTTCAATGATTAGCTAACAAATCTATTTATCGGC  |
| template | GGGTGGTTTTAATTTGCTGATGACTATTTTTATTATGAGTTGAGAGCTTATGCGATAC    |
| query    | GGGTGGTTTTAATTTGCTGATGACTATTTTTATTATGAGTTGAGAGCTTATGCGATAC    |
| template | CTATTATTGGGGAGGATATAGTTAGTGCAATAATTGATGTCTACCTAATTA AAAAATGA  |
| query    | CTATTATTGGGGAGGATATAGTTAGTGCAATAATTGATGTCTACCTAATTA AAAAATGA  |
| template | AGAGTGTTTTTAATTAAGCACTCATCTTTGTTGTGGGCGCATAAAAATGGCGTCGTTGT   |
| query    | AGAGTGTTTTTAATTAAGCACTCATCTTTGTTGTGGGCGCATAAAAATGGCGTCGTTGT   |
| template | TTTTATTTTCTGATTACGAGATGAAGAAACTGAAATCTATAAAGCGTATTGGTAGCA     |
| query    | TTTTATTTTCTGATTACGAGATGAAGAAACTGAAATCTATAAAGCGTATTGGTAGCA     |
| template | GGAAGCCAAGGGCGGTAGCGTTCACCTTCTGAATAAGTTGAGCATCCTTTATCCTTTCTA  |
| query    | GGAAGCCAAGGGCGGTAGCGTTCACCTTCTGAATAAGTTGAGCATCCTTTATCCTTTCTA  |
| template | ATCCACAAAAACATTTTATTCACAATGTAATATCAGGAGACAACATGGAAGACGAAAGTA  |
| query    | ATCCACAAAAACATTTTATTCACAATGTAATATCAGGAGACAACATGGAAGACGAAAGTA  |
| template | ATCCGTGGCCTAGTTTGTGATACATTCTCTACGGTATTGTGCATTTTATATTTCTTA     |
| query    | ATCCGTGGCCTAGTTTGTGATACATTCTCTACGGTATTGTGCATTTTATATTTCTTA     |
| template | TGTTGGTGTGTCACCTTAATAATATGATTATTATGTATGACAACCAATTAAAGTTTATA   |
| query    | TGTTGGTGTGTCACCTTAATAATATGATTATTATGTATGACAACCAATTAAAGTTTATA   |
| template | AAGCAAATATAGAGAATAAGACTAAATCTACTGCTCAAAATAGCGGAGCCAATGACGATT  |
| query    | AAGCAAATATAGAGAATAAGACTAAATCTACTGCTCAAAATAGCGGAGCCAATGACGATT  |
| template | CAAATCCTAATGAAATAGTTAATAAGGAAGTGAATACTCAAGATGTGTCGGACGGAATGA  |
| query    | CAAATCCTAATGAAATAGTTAATAAGGAAGTGAATACTCAAGATGTGTCGGACGGAATGA  |
| template | CTACAATGTCAGGTAAGGAGGTTGGAGTATACGATATCGCCGATGGTCAGAAAACTGATA  |
| query    | CTACAATGTCAGGTAAGGAGGTTGGAGTATACGATATCGCCGATGGTCAGAAAACTGATA  |
| template | TAACGTCTACAAAAAATGAGCTTGTATTACGTATCATGGCAGGCTGAGAAGCTTTTCAG   |
| query    | TAACGTCTACAAAAAATGAGCTTGTATTACGTATCATGGCAGGCTGAGAAGCTTTTCAG   |
| template | AAGAGGACACTTATAAAATAAAGGCTTGGTTAGAAGACAAAATCAATAGTAATTTATTGA  |
| query    | AAGAGGACACTTATAAAATAAAGGCTTGGTTAGAAGACAAAATCAATAGTAATTTATTGA  |
| template | TAGAAATGGTTATTCTCAGGCAGACATCTCTTCTCTGACTCTCTACGACTGGGATATG    |
| query    | TAGAAATGGTTATTCTCAGGCAGACATCTCTTCTCTGACTCTCTACGACTGGGATATG    |
| template | AACGGGGAATTATTTTGATGAAAGAGATTAAGAAAAATATATCCTGATGTAGTTATTGACA |
| query    | AACGGGGAATTATTTTGATGAAAGAGATTAAGAAAAATATATCCTGATGTAGTTATTGACA |
| template | TGAGTGTTAACTCCGCAGCATCAAGTACAACGAGTAAAGCTATTATCACGACTATTAATA  |
| query    | TGAGTGTTAACTCCGCAGCATCAAGTACAACGAGTAAAGCTATTATCACGACTATTAATA  |
| template | AAAAGGTGTCAGAGTGAAATATATAAATCATTACCGCTATTTGTTTGCTGTTTTTTCCT   |
| query    | AAAAGGTGTCAGAGTGAAATATATAAATCATTACCGCTATTTGTTTGCTGTTTTTTCCT   |
| template | TGCCATACTCCCTTTTTTGCTTTATCTTTCCCGGTATAAGAGAGTATGTTTTGATAA     |
| query    | TGCCATACTCCCTTTTTTGCTTTATCTTTCCCGGTATAAGAGAGTATGTTTTGATAA     |
| template | CTTCATGTTTTCTGCAATTTACAATGGAGTCATTATTGCCATTTATATTACAGGTTCTTT  |
| query    | CTTCATGTTTTCTGCAATTTACAATGGAGTCATTATTGCCATTTATATTACAGGTTCTTT  |
| template | GTGTGCATTATTCACTATTCTTAAAAATATTTACGCAAAAGACATATTAATAGCTCAGGA  |
| query    | GTGTGCATTATTCACTATTCTTAAAAATATTTACGCAAAAGACATATTAATAGCTCAGGA  |

|                |                                                                                                                                |
|----------------|--------------------------------------------------------------------------------------------------------------------------------|
| template query | CGCCAGTAGAAAAATAGCATTCTTTCTAACCTCAATCAGGTTTTGTTTGCCGGGGAGTC                                                                    |
| template query | CAAAACAGTGTGATTTCAATTTACTGATGGAATTAGATGACAATGTGTCTACCGCCCGTAA<br>CAAAACAGTGTGATTTCAATTTACTGATGGAATTAGATGACAATGTGTCTACCGCCCGTAA |
| template query | TCAACGATTGTCATTATTATGAGCTGTAGCAATGTGTCGACGCTTGTGGCCTGTTGGG<br>TCAACGATTGTCATTATTATGAGCTGTAGCAATGTGTCGACGCTTGTGGCCTGTTGGG       |
| template query | GACGTTTGCGGGTCTGTCTATTACGATTGGTTCAATCGGGAACCTATTGAGCTCGCCATC<br>GACGTTTGCGGGTCTGTCTATTACGATTGGTTCAATCGGGAACCTATTGAGCTCGCCATC   |
| template query | AGATGTTGGCGGTGATAATGCAAGTAATACACTCAATATGATCGTGACAATGGTAGCGTC<br>AGATGTTGGCGGTGATAATGCAAGTAATACACTCAATATGATCGTGACAATGGTAGCGTC   |
| template query | GCTTTCTGAACCATTGAAAGGGATGAATACCGCATTGTATCTTCTATCTATGGTGTGT<br>GCTTTCTGAACCATTGAAAGGGATGAATACCGCATTGTATCTTCTATCTATGGTGTGT       |
| template query | TTGCGCCATACTCCTGACCTCACAAAGTGTGTTTGTTCGAGCTCCTATTCCCTTGTTTC<br>TTGCGCCATACTCCTGACCTCACAAAGTGTGTTTGTTCGAGCTCCTATTCCCTTGTTTC     |
| template query | TACGGAAATCAAAAAATAAAAATCATAAGCAACAGAGCCAATAATAACAGCGAAGCCT<br>TACGGAAATCAAAAAATAAAAATCATAAGCAACAGAGCCAATAATAACAGCGAAGCCT       |
| template query | GCGGGTTGAATCAGAGACGCTTGTAAGATTTAAAGAGTTGTTTAAAGCGTTTTTTGATAA<br>GCGGGTTGAATCAGAGACGCTTGTAAGATTTAAAGAGTTGTTTAAAGCGTTTTTTGATAA   |
| template query | CTACCTGACAGTTGAAAACCTACGGACGCAGGATGAAGAAAAGAAACGAGAGATGCTATC<br>CTACCTGACAGTTGAAAACCTACGGACGCAGGATGAAGAAAAGAAACGAGAGATGCTATC   |
| template query | AGATAGCTTTGTCACTTTGCAAAACCGACTATTGGATAACTCAGCAAACTGGAACAAAT<br>AGATAGCTTTGTCACTTTGCAAAACCGACTATTGGATAACTCAGCAAACTGGAACAAAT     |
| template query | TTCTACGCTGATTGATGGTTATCTGGTAAGCAGTAACGAAAATCTCAAAAAATTATCTGA<br>TTCTACGCTGATTGATGGTTATCTGGTAAGCAGTAACGAAAATCTCAAAAAATTATCTGA   |
| template query | CGGTGTAATAACAATTACCTCTCGTTTATCTGAAGGTAATATCCTGCTTGCTGATAATAA<br>CGGTGTAATAACAATTACCTCTCGTTTATCTGAAGGTAATATCCTGCTTGCTGATAATAA   |
| template query | TGCACGACTGGAGGCAATGAGTACAATACAAAATATTATAGATAAAAAGAATGATTCAAT<br>TGCACGACTGGAGGCAATGAGTACAATACAAAATATTATAGATAAAAAGAATGATTCAAT   |
| template query | AATGACATCAGTTGATAAATGTTATCAGGAATCTCTTTCACATGGTAAGACCATAAACGA<br>AATGACATCAGTTGATAAATGTTATCAGGAATCTCTTTCACATGGTAAGACCATAAACGA   |
| template query | TATTGCCGCTGGCAGTGCCGATATTTCTCATACTCTCGATGGGCTGAGAAAAGAAATGGA<br>TATTGCCGCTGGCAGTGCCGATATTTCTCATACTCTCGATGGGCTGAGAAAAGAAATGGA   |
| template query | TGAGGATATGAATAATGTTCAATTTAGCGCTATCCGATCTATCGGCTACTGATAAAAAGAT<br>TGAGGATATGAATAATGTTCAATTTAGCGCTATCCGATCTATCGGCTACTGATAAAAAGAT |
| template query | TATTGCCAATACTAAAGAGATTAGTGCTGAAATGGTAGCTACCGTGATACCTATATGCC<br>TATTGCCAATACTAAAGAGATTAGTGCTGAAATGGTAGCTACCGTGATACCTATATGCC     |
| template query | ATTAATGGAAAAATAACATCTATGCATCAGGAAATAGTAAAGCAACGTTTGTAAACAA<br>ATTAATGGAAAAATAACATCTATGCATCAGGAAATAGTAAAGCAACGTTTGTAAACAA       |
| template query | GGAGGAAAAAATGAAGATTAAGATGTTTTTCTGACGACTGCTTTTATTACACAAAGCA<br>GGAGGAAAAAATGAAGATTAAGATGTTTTTCTGACGACTGCTTTTATTACACAAAGCA       |
| template query | CATACGCCAGCGAGCTTCCGGTCATTCTCTAAGAGATTTAGTTAATGCCGCATTAACGC<br>CATACGCCAGCGAGCTTCCGGTCATTCTCTAAGAGATTTAGTTAATGCCGCATTAACGC     |
| template query | ATCAGCCCTCTGTTGCTGTTTCATATTATGAGACTGAAAAGAAAAACAGTGACTTAGATC<br>ATCAGCCCTCTGTTGCTGTTTCATATTATGAGACTGAAAAGAAAAACAGTGACTTAGATC   |
| template query | TTTCACGGGCAGCACTTTATCCTACCCTGGATCTAACATCTGGCCTTAATAATAACAGGA<br>TTTCACGGGCAGCACTTTATCCTACCCTGGATCTAACATCTGGCCTTAATAATAACAGGA   |
| template       | AAGAGTCATCAGGTACCGAGAGGAACGTTGAAAAAAGGTGTCTTTATCATACCGAATAA                                                                    |

|          |                                                                 |
|----------|-----------------------------------------------------------------|
| query    | AAGAGTCATCAGGTACCGAGAGGAACGTTGAAAAATAAGGTGTCCTTTATCATACCCGAATAA |
| template | CGGATTTTGGAGTGAGGGGGGCTAATATCAGGAAATCTGAATATGAAAGAGATAATAGTA    |
| query    | CGGATTTTGGAGTGAGGGGGGCTAATATCAGGAAATCTGAATATGAAAGAGATAATAGTA    |
| template | AAACTGACTATGAAAAACAAAGAATATAGTGTCTCAGGAGGTTGTGACAACCTATTACA     |
| query    | AAACTGACTATGAAAAACAAAGAATATAGTGTCTCAGGAGGTTGTGACAACCTATTACA     |
| template | ACATCAGTAAATATCGTGAAATGATTGATGGCGTAAATCTGGAGAAAGAGTTTATAAAA     |
| query    | ACATCAGTAAATATCGTGAAATGATTGATGGCGTAAATCTGGAGAAAGAGTTTATAAAA     |
| template | AGATGCTGGAAACTTTTTCGTTGCTGGTATCTTCCGGTGTAGCTATGCAATCTGATATGC    |
| query    | AGATGCTGGAAACTTTTTCGTTGCTGGTATCTTCCGGTGTAGCTATGCAATCTGATATGC    |
| template | GTAAAGTACAAGTATCTATCGATGCATTAAATACCAGAAGCATTATGTATCAGTCGATGT    |
| query    | GTAAAGTACAAGTATCTATCGATGCATTAAATACCAGAAGCATTATGTATCAGTCGATGT    |
| template | TGGATGATGAAATGTATAAAATGCAGAATATGACTGGTCTGAATTTATCGCCAGTTCAGA    |
| query    | TGGATGATGAAATGTATAAAATGCAGAATATGACTGGTCTGAATTTATCGCCAGTTCAGA    |
| template | TTCAAAGCGATGAAAAATTCAACCTCTTCAAAAAATATATCTTTGTGAAAGCCCTGAAA     |
| query    | TTCAAAGCGATGAAAAATTCAACCTCTTCAAAAAATATATCTTTGTGAAAGCCCTGAAA     |
| template | AAC TTATGGACATGGTGATGAAATACAACGATGACTATAAGATGCTTGTCATACCCGAA    |
| query    | AAC TTATGGACATGGTGATGAAATACAACGATGACTATAAGATGCTTGTCATACCCGAA    |
| template | AAGCCGCGACCGAAGATATTAATGCCGCAAAATCATCCTATTTTCCGACTGTAGATCTTG    |
| query    | AAGCCGCGACCGAAGATATTAATGCCGCAAAATCATCCTATTTTCCGACTGTAGATCTTG    |
| template | TTTCCAGCTATGTACAGAATAACCCGAGCGGTAGTGCCAAAAAAGTGATTATGAAGATG     |
| query    | TTTCCAGCTATGTACAGAATAACCCGAGCGGTAGTGCCAAAAAAGTGATTATGAAGATG     |
| template | AATTTAAACGGGTATCAATGTCAGTTTCAACATTTTAAATGGGTTCAGAAATTCAGCCC     |
| query    | AATTTAAACGGGTATCAATGTCAGTTTCAACATTTTAAATGGGTTCAGAAATTCAGCCC     |
| template | AGGAAAGAAAAATGGTGGCAAGTTACTCGCAGGCTAAGCTGCAAAATGACGATTTTTTGA    |
| query    | AGGAAAGAAAAATGGTGGCAAGTTACTCGCAGGCTAAGCTGCAAAATGACGATTTTTTGA    |
| template | TTAAACGCGTTATAACATTGATTACAACTTTCAAGATACGCCGCTGCAAAAGAGACTT      |
| query    | TTAAACGCGTTATAACATTGATTACAACTTTCAAGATACGCCGCTGCAAAAGAGACTT      |
| template | ACTCAGTGGCGGAACGTTACATACAAACGCGTTACAGCTTACTGAATTATATGAGCAGG     |
| query    | ACTCAGTGGCGGAACGTTACATACAAACGCGTTACAGCTTACTGAATTATATGAGCAGG     |
| template | AGTTTCAGTTAGGGCAAAAAAGTTTGCTTGATTAAATTTCAAGCCGTAATGAAGCATTTTC   |
| query    | AGTTTCAGTTAGGGCAAAAAAGTTTGCTTGATTAAATTTCAAGCCGTAATGAAGCATTTTC   |
| template | AGGCATATGTAAGCATGATCGACAGCAAAATATAGCCTGTATATTTTAAAGCTACAGCAAC   |
| query    | AGGCATATGTAAGCATGATCGACAGCAAAATATAGCCTGTATATTTTAAAGCTACAGCAAC   |
| template | TCTCATTGATTTTTTCATTTAATGGATTATTTAAAGGAAATACTGAAAGTGAGTTAAATG    |
| query    | TCTCATTGATTTTTTCATTTAATGGATTATTTAAAGGAAATACTGAAAGTGAGTTAAATG    |
| template | TAATGAAATGAATAGAAGACAAAGCGATCATCTCATGATGATAATTATTTCTTTGACGAT    |
| query    | TAATGAAATGAATAGAAGACAAAGCGATCATCTCATGATGATAATTATTTCTTTGACGAT    |
| template | CTTAATTATTATCCTTACCTACTTTATAGAAATTAATTCAGTGGTTCATGGTCAGGGCGT    |
| query    | CTTAATTATTATCCTTACCTACTTTATAGAAATTAATTCAGTGGTTCATGGTCAGGGCGT    |
| template | TATCACTACTAAAGATAATGCTCAGTTAATATCTCTTTCTAAAGGAGGGACGATACAAGA    |
| query    | TATCACTACTAAAGATAATGCTCAGTTAATATCTCTTTCTAAAGGAGGGACGATACAAGA    |
| template | TATTTATGTAGCCGAGGGTGATACTGTAAAAAAGGAGAACTCCTTGCAAAGGTCGTTAA     |
| query    | TATTTATGTAGCCGAGGGTGATACTGTAAAAAAGGAGAACTCCTTGCAAAGGTCGTTAA     |
| template | CCTTGATCTGCAAAAAGAATATCAAAGGTATAGAACTCAAAAAGGGTATCTGGATAAAGA    |
| query    | CCTTGATCTGCAAAAAGAATATCAAAGGTATAGAACTCAAAAAGGGTATCTGGATAAAGA    |
| template | TGTTAACGAAATATCTTTCATTCTTGATAAAGAAAAATGAGAGTGGGTTGATTACCCTGGA   |
| query    | TGTTAACGAAATATCTTTCATTCTTGATAAAGAAAAATGAGAGTGGGTTGATTACCCTGGA   |



|          |                                                               |
|----------|---------------------------------------------------------------|
| template | TGGCACCCGTTCTTTAAGCAATAAAGAGGTAAAAGCGAATATTGAATTAGTGCATAGTCA  |
| query    | TGGCACCCGTTCTTTAAGCAATAAAGAGGTAAAAGCGAATATTGAATTAGTGCATAGTCA  |
| template | GATAAGAGCTAAAGAGTTAAAAAAAACCTCTCTTGATTCTGAGATTAGCGGATTACAAGA  |
| query    | GATAAGAGCTAAAGAGTTAAAAAAAACCTCTCTTGATTCTGAGATTAGCGGATTACAAGA  |
| template | GAAGCTGAGTTCGAAAGAAAAAGAACTCGCATTGCTTGCCGAAGAAATAAATATTCTTTC  |
| query    | GAAGCTGAGTTCGAAAGAAAAAGAACTCGCATTGCTTGCCGAAGAAATAAATATTCTTTC  |
| template | CCCCTGGTAAAAAAGGAATTAGCCCATATACCAATTTTCTTAACAAGAAACAGGCGTA    |
| query    | CCCCTGGTAAAAAAGGAATTAGCCCATATACCAATTTTCTTAACAAGAAACAGGCGTA    |
| template | TATAAAAGTTAAGTCTGAAATTAATGATATTGAAAGTAGCATCACTTTAAAAAAGATGA   |
| query    | TATAAAAGTTAAGTCTGAAATTAATGATATTGAAAGTAGCATCACTTTAAAAAAGATGA   |
| template | TATTGAGTTGGTTGTTAATGATATTGAGGCGCTTAATAATGAATTGCGACTATCTTTATC  |
| query    | TATTGAGTTGGTTGTTAATGATATTGAGGCGCTTAATAATGAATTGCGACTATCTTTATC  |
| template | TAAAATAATATCTAAAAATCTTCAGGAACCTTGAGGTGTTAACTCTACATTAAAAGTAAT  |
| query    | TAAAATAATATCTAAAAATCTTCAGGAACCTTGAGGTGTTAACTCTACATTAAAAGTAAT  |
| template | AGAGAAGCAGATAAATGAGGAGGATATCTATTCACCGGTTGACGGTGTAATTTATAAAAT  |
| query    | AGAGAAGCAGATAAATGAGGAGGATATCTATTCACCGGTTGACGGTGTAATTTATAAAAT  |
| template | CAATAAAAGTGCCACTACTCATGGTGGTGTGATTGAGCGGCGGACTTACTTTTTGAAAT   |
| query    | CAATAAAAGTGCCACTACTCATGGTGGTGTGATTGAGCGGCGGACTTACTTTTTGAAAT   |
| template | AAAACCAAAAGTAAGGACTATGCTGGCCGATGTGAAAATATTACCCAATACCGTGACCA   |
| query    | AAAACCAAAAGTAAGGACTATGCTGGCCGATGTGAAAATATTACCCAATACCGTGACCA   |
| template | AATATATGTAGATGAAGCCGTTAAACTGGATGTGCAGTCAATTATCCAACCAAGATAAA   |
| query    | AATATATGTAGATGAAGCCGTTAAACTGGATGTGCAGTCAATTATCCAACCAAGATAAA   |
| template | ATCGTATAATGCGACTATCGATAATATTAGCCCTGATTCCATGAGGAAAAATACCGGAGG  |
| query    | ATCGTATAATGCGACTATCGATAATATTAGCCCTGATTCCATGAGGAAAAATACCGGAGG  |
| template | AACAATTCAGCGTTATTATAAAGTAATTATTGCATTGATGTTAATGAAGATGATTACG    |
| query    | AACAATTCAGCGTTATTATAAAGTAATTATTGCATTGATGTTAATGAAGATGATTACG    |
| template | GTGGTTAAAACCAGGTATGACTGTTGACGCCAGTGAATTACCGGAAAACACAGCATTAT   |
| query    | GTGGTTAAAACCAGGTATGACTGTTGACGCCAGTGAATTACCGGAAAACACAGCATTAT   |
| template | GGAATACCTGTTATCTCCCTTGATGAAAGGCGTGGACAAAGCCTTTTCAGAACCAGTTAA  |
| query    | GGAATACCTGTTATCTCCCTTGATGAAAGGCGTGGACAAAGCCTTTTCAGAACCAGTTAA  |
| template | TACTAAACGATTAGATACACCTTGAGAGTGAATATAATATTATGGGAAATAAAAGCATACT |
| query    | TACTAAACGATTAGATACACCTTGAGAGTGAATATAATATTATGGGAAATAAAAGCATACT |
| template | AAAAGTTTTTTGCCGATCAAAATCTGTAATTGATTATCTTCTTTGGGTAATGCCAAAG    |
| query    | AAAAGTTTTTTGCCGATCAAAATCTGTAATTGATTATCTTCTTTGGGTAATGCCAAAG    |
| template | GCGCAAAAGTTTCTCTTTCCGGGCCAGACATGAACATTACCACGCCGCGTGGTTCAGTGA  |
| query    | GCGCAAAAGTTTCTCTTTCCGGGCCAGACATGAACATTACCACGCCGCGTGGTTCAGTGA  |
| template | TCATTGTCAATGGCGCTCTTTATTCAAGTATCAAAGGCAATAACCTCGCTGTTAAATTTA  |
| query    | TCATTGTCAATGGCGCTCTTTATTCAAGTATCAAAGGCAATAACCTCGCTGTTAAATTTA  |
| template | AAGATAAGACTATTACCGGCGCTAAAATTCTGGGCAGCGTAGATTAAAAAGATATTCAAC  |
| query    | AAGATAAGACTATTACCGGCGCTAAAATTCTGGGCAGCGTAGATTAAAAAGATATTCAAC  |
| template | TGGAGAGAATTGACAGCTCATTGGTTGATTCTGCTCAGGTAGAAAAGAAAGGTAATGGCA  |
| query    | TGGAGAGAATTGACAGCTCATTGGTTGATTCTGCTCAGGTAGAAAAGAAAGGTAATGGCA  |
| template | AACGACGAAATAAGAAGGAAGAAGAGGAATAAAAAAGCAGCTTGACGATGCTGAAAACG   |
| query    | AACGACGAAATAAGAAGGAAGAAGAGGAATAAAAAAGCAGCTTGACGATGCTGAAAACG   |
| template | CAAAGAAAGAAGCTGATAAGGCGAAGGAAGAAGCAGAGAAAGCTAAGGAGGCTGCAGAAA  |
| query    | CAAAGAAAGAAGCTGATAAGGCGAAGGAAGAAGCAGAGAAAGCTAAGGAGGCTGCAGAAA  |

|          |                                                                |
|----------|----------------------------------------------------------------|
| template | AAGCGCTCAATGAAGCGTTTGAAGTACAGAAGCTCGTCAAAGCAAATTGAAGAAATGCTGC  |
| query    | AAGCGCTCAATGAAGCGTTTGAAGTACAGAAGCTCGTCAAAGCAAATTGAAGAAATGCTGC  |
| template | AGAACTTTTTGGCTGACAATGTAGCAAAAGACAATCTGGCTCAGCAAAGCGATGCTTCCC   |
| query    | AGAACTTTTTGGCTGACAATGTAGCAAAAGACAATCTGGCTCAGCAAAGCGATGCTTCCC   |
| template | AGCAAAATACACAGGCTAAAGCAACGCAGGCTTCTAAACAGAACGATGCTGAAAAAGTTC   |
| query    | AGCAAAATACACAGGCTAAAGCAACGCAGGCTTCTAAACAGAACGATGCTGAAAAAGTTC   |
| template | TTCTCTAACCTATTAATAAAAAATACCAGTACTGGCAAAAGTAATAGCAGTAAAAATGAGG  |
| query    | TTCTCTAACCTATTAATAAAAAATACCAGTACTGGCAAAAGTAATAGCAGTAAAAATGAGG  |
| template | AAAAAAGCTCGATGCCGAGTCTGTTAAAGAGCCGCTTAAAGTCACATTAGCGCTTGCGG    |
| query    | AAAAAAGCTCGATGCCGAGTCTGTTAAAGAGCCGCTTAAAGTCACATTAGCGCTTGCGG    |
| template | CCGAGAGTAACAGCGGTAGCAAAGATGATAGTATAACTAATTTTACCAAACCTCAGTTTG   |
| query    | CCGAGAGTAACAGCGGTAGCAAAGATGATAGTATAACTAATTTTACCAAACCTCAGTTTG   |
| template | TAGGTAGCACTGCTCCCAATGCCACGGTTATTATTAATAATTAATGGTATTGCTGTCGGTC  |
| query    | TAGGTAGCACTGCTCCCAATGCCACGGTTATTATTAATAATTAATGGTATTGCTGTCGGTC  |
| template | AGGCTGTAGCGGATAGTTTGGGTAACCTTACACCTTTACAGCGCCTGAAACATTGACTGATG |
| query    | AGGCTGTAGCGGATAGTTTGGGTAACCTTACACCTTTACAGCGCCTGAAACATTGACTGATG |
| template | GAACATATAATCTGGAGGCAGAGGCCAAGACTGCTGATGGGAGCGGTAGCGCCAAACTTG   |
| query    | GAACATATAATCTGGAGGCAGAGGCCAAGACTGCTGATGGGAGCGGTAGCGCCAAACTTG   |
| template | TCATTACTATCGATTCCGTTACCGATAAACCAACATTTGAACTTTCGCCTGAAAGTAGTG   |
| query    | TCATTACTATCGATTCCGTTACCGATAAACCAACATTTGAACTTTCGCCTGAAAGTAGTG   |
| template | TGTCCGGTCATAAGGGCTTAACGCCGACCTTGACGCCTTCAATTGTTGGTACGGCGGAAG   |
| query    | TGTCCGGTCATAAGGGCTTAACGCCGACCTTGACGCCTTCAATTGTTGGTACGGCGGAAG   |
| template | AGAATGCTAAGGTTGACATTTATGTAGATAATAAACTGGTTGCCAGCGTTGATGTCGATA   |
| query    | AGAATGCTAAGGTTGACATTTATGTAGATAATAAACTGGTTGCCAGCGTTGATGTCGATA   |
| template | AAGATGGAAACTGGAGTTATGAATTTAAGGATAATGAATTATCTGAGGGCGAAAATAGTA   |
| query    | AAGATGGAAACTGGAGTTATGAATTTAAGGATAATGAATTATCTGAGGGCGAAAATAGTA   |
| template | TAAAAGTCGTTGCTGTAGATAAAGCAGGTAATAAAAAACGAAACGACGGATAGTATCATAA  |
| query    | TAAAAGTCGTTGCTGTAGATAAAGCAGGTAATAAAAAACGAAACGACGGATAGTATCATAA  |
| template | CCGACACCATTGCTCCAGAAAAGCCGACGATTGAGCTGGATGATAGTAGTGATTCCGGCA   |
| query    | CCGACACCATTGCTCCAGAAAAGCCGACGATTGAGCTGGATGATAGTAGTGATTCCGGCA   |
| template | TTAAAAATGACAACATTACAAATAGCACCTTGCCAACATTTATTGGTGTGGCGGAACCCG   |
| query    | TTAAAAATGACAACATTACAAATAGCACCTTGCCAACATTTATTGGTGTGGCGGAACCCG   |
| template | GTTCTACAGTCTCTATTTATCTTGGACTTAACATCTTGGTGAGGTCATTGTTGCTAAAG    |
| query    | GTTCTACAGTCTCTATTTATCTTGGACTTAACATCTTGGTGAGGTCATTGTTGCTAAAG    |
| template | ATGGGACATGGAGCTATACGCTTACTACGCCGCTCAAGGATGGCGAATACAATATAACAG   |
| query    | ATGGGACATGGAGCTATACGCTTACTACGCCGCTCAAGGATGGCGAATACAATATAACAG   |
| template | CAACAGCTACTGATATTGCCGGGCATACCTCAGCGACGGCAAATCTGCCTTTTACTATTG   |
| query    | CAACAGCTACTGATATTGCCGGGCATACCTCAGCGACGGCAAATCTGCCTTTTACTATTG   |
| template | ATACACGTATCAGCTATTTTACGCGCTGAGATTGAAACGACGAATGATAGCGGTATTGTCTG |
| query    | ATACACGTATCAGCTATTTTACGCGCTGAGATTGAAACGACGAATGATAGCGGTATTGTCTG |
| template | GAGATAACGTTACTAACAATACTCGCCCAACCTTTACAGGTAAAACCTGAGCCAAATGCTA  |
| query    | GAGATAACGTTACTAACAATACTCGCCCAACCTTTACAGGTAAAACCTGAGCCAAATGCTA  |
| template | TTATCAGTGTATATAATAGTGAGACTGGCGAAGAGGTTATTTTAAAGCGAATGACAAGG    |
| query    | TTATCAGTGTATATAATAGTGAGACTGGCGAAGAGGTTATTTTAAAGCGAATGACAAGG    |
| template | GCGAATGGACGTTCAATTTCACTTCCGACTCAGTGGAAGGGATTAAACAATCTTACGTTCA  |
| query    | GCGAATGGACGTTCAATTTCACTTCCGACTCAGTGGAAGGGATTAAACAATCTTACGTTCA  |
| template | CTGTTGAAGATGTCGCTGGCAACAAAAAGGATTTTTCTTTAGTTACGTTATTGATACTA    |

|          |                                                               |
|----------|---------------------------------------------------------------|
| query    | CTGTTGAAGATGTCGCTGGCAACAAAAAGGATTTTCCTTTAGTTACGTTATTGATACTA   |
| template | TTGCCCTGTACCTCCGACGGTTTCTTTGGAGGATTATGTTGTTTTGCCGAATGGTATAA   |
| query    | TTGCCCTGTACCTCCGACGGTTTCTTTGGAGGATTATGTTGTTTTGCCGAATGGTATAA   |
| template | TTTTATCAGGGAATGATTTACCGGCTTTAGTCGGTACGGCAGAGCCAAAGCTACCATCT   |
| query    | TTTTATCAGGGAATGATTTACCGGCTTTAGTCGGTACGGCAGAGCCAAAGCTACCATCT   |
| template | TATTGATGCGAGATGGTAAATTATATGACAGCATTGAGGTTGACTCAAACGGGACCTGGA  |
| query    | TATTGATGCGAGATGGTAAATTATATGACAGCATTGAGGTTGACTCAAACGGGACCTGGA  |
| template | ATTATCAGTTTAGTAATAAAATTTCTTCAGGGCGCCTATGATATTGAAATCATTCTCAGG  |
| query    | ATTATCAGTTTAGTAATAAAATTTCTTCAGGGCGCCTATGATATTGAAATCATTCTCAGG  |
| template | ATGCCGCCGGCAATAAATCCTCTACTGTAAATATTCTTTTACTATTCAAACCTGAAGTTG  |
| query    | ATGCCGCCGGCAATAAATCCTCTACTGTAAATATTCTTTTACTATTCAAACCTGAAGTTG  |
| template | TACCTCCAAAAGCGGAACTCGATGCCAGTGATGATTCCGGTGCAAAGGCGACTGGATTA   |
| query    | TACCTCCAAAAGCGGAACTCGATGCCAGTGATGATTCCGGTGCAAAGGCGACTGGATTA   |
| template | CCAATAAACATAATGCTCTGACATTACTGGGAACAGCGGATAGGTTTGCTACCGTAAATA  |
| query    | CCAATAAACATAATGCTCTGACATTACTGGGAACAGCGGATAGGTTTGCTACCGTAAATA  |
| template | TCCTTATTGACGGTAAAACGATAGGCGTGACGACTGCGGATGCAGACGGTAACTGGAATT  |
| query    | TCCTTATTGACGGTAAAACGATAGGCGTGACGACTGCGGATGCAGACGGTAACTGGAATT  |
| template | TTGATATTTCCAGAAATCTGTCTGACAATGTTTATAAGATTACGGTTGAATCCATCGATC  |
| query    | TTGATATTTCCAGAAATCTGTCTGACAATGTTTATAAGATTACGGTTGAATCCATCGATC  |
| template | CTTTAGGAAGAACGTCATCTGTAGATTATCAGCTTACCATTGATAGCTTTACGCCGATCC  |
| query    | CTTTAGGAAGAACGTCATCTGTAGATTATCAGCTTACCATTGATAGCTTTACGCCGATCC  |
| template | CTACTGTTATGTTGCATGATAGCGCTGACTCTGGCGTTAAAGGCGATATGATTACTAAAA  |
| query    | CTACTGTTATGTTGCATGATAGCGCTGACTCTGGCGTTAAAGGCGATATGATTACTAAAA  |
| template | TTAATACACCGTTGTTTACCGGGATGGCTGAAGCTAATGCTAAGGTTTCCATCTATGTTG  |
| query    | TTAATACACCGTTGTTTACCGGGATGGCTGAAGCTAATGCTAAGGTTTCCATCTATGTTG  |
| template | ACGGTGTGTTAAGTGGTGAGGCTATTGCTGGCGATGATGGTGTATGGAATTTCAATTTA   |
| query    | ACGGTGTGTTAAGTGGTGAGGCTATTGCTGGCGATGATGGTGTATGGAATTTCAATTTA   |
| template | CCACAGCGTTATCCGATGGCTCGCATGACGTAACGGTAAAGGTAGAAGATATTGCCGGTA  |
| query    | CCACAGCGTTATCCGATGGCTCGCATGACGTAACGGTAAAGGTAGAAGATATTGCCGGTA  |
| template | ATACTGCCTCCTCATCAGCGTATAATTTCCAAATCGTAACGCAAAACGCAAAAACCAACAA |
| query    | ATACTGCCTCCTCATCAGCGTATAATTTCCAAATCGTAACGCAAAACGCAAAAACCAACAA |
| template | TAGAGTTGGTCAACGATACGGGGGTTGATAATACAGACCATATTATTAATGAAAAGAATC  |
| query    | TAGAGTTGGTCAACGATACGGGGGTTGATAATACAGACCATATTATTAATGAAAAGAATC  |
| template | CTGCACTGACAGGAACCGCTGCACCTATTCAACGGTTAAACTCTATATTGATGGTGCAC   |
| query    | CTGCACTGACAGGAACCGCTGCACCTATTCAACGGTTAAACTCTATATTGATGGTGCAC   |
| template | TGATCGCTGAGGTGAGAACAATAAAGATGGCAGATGGGAGTATACCTGAAAGCCGATC    |
| query    | TGATCGCTGAGGTGAGAACAATAAAGATGGCAGATGGGAGTATACCTGAAAGCCGATC    |
| template | AAGGTTTGGTTGATGGCGATCATAGAATAACCGCTTCAGTTGAAGATATCGCTGGCAACA  |
| query    | AAGGTTTGGTTGATGGCGATCATAGAATAACCGCTTCAGTTGAAGATATCGCTGGCAACA  |
| template | TTGCTCATTCCGGATCCTTTCTTAATTAGCGTCGATACTGCTATTTCAATACCGATAGTTT |
| query    | TTGCTCATTCCGGATCCTTTCTTAATTAGCGTCGATACTGCTATTTCAATACCGATAGTTT |
| template | CATTGAGCCCGGATTAGATTTCGGGAATTTAGATGATAATTTAACGAATATCGTTAAAC   |
| query    | CATTGAGCCCGGATTAGATTTCGGGAATTTAGATGATAATTTAACGAATATCGTTAAAC   |
| template | CTACCTTGACCTAAAAGATATTGATCCGGACATTATCAGTGTTCAAGGTATGGGATGCCA  |
| query    | CTACCTTGACCTAAAAGATATTGATCCGGACATTATCAGTGTTCAAGGTATGGGATGCCA  |
| template | TGTCTGATACGCAGATCGGTGTTGCCACGCAACAACCTGATGGTTCATGGGCCATACCT   |
| query    | TGTCTGATACGCAGATCGGTGTTGCCACGCAACAACCTGATGGTTCATGGGCCATACCT   |

|          |                                                                |
|----------|----------------------------------------------------------------|
| template | TTACTTCAGATTTAACGGAAGGCTTGCATCAGGTTTATGTCAAGGTTGAGGACATTGCGG   |
| query    | TTACTTCAGATTTAACGGAAGGCTTGCATCAGGTTTATGTCAAGGTTGAGGACATTGCGG   |
| template | GTAATAAAGCGAACAGCGCATATTCGATTTTACTATCGATACCACAGTATCAACGCCGG    |
| query    | GTAATAAAGCGAACAGCGCATATTCGATTTTACTATCGATACCACAGTATCAACGCCGG    |
| template | TGATTTCCCTGCTTTCTAAGGATGATACGGGGGTTACAGGCGATAACCTGACCAATATCA   |
| query    | TGATTTCCCTGCTTTCTAAGGATGATACGGGGGTTACAGGCGATAACCTGACCAATATCA   |
| template | ATAAGCCAGGTTTTGCTATTTCCGGTGTTGATGCCGATGCGCATCGGGTCGTCGTACAGG   |
| query    | ATAAGCCAGGTTTTGCTATTTCCGGTGTTGATGCCGATGCGCATCGGGTCGTCGTACAGG   |
| template | TGATGCACAATGGCGTGAGCGAAGAGATCGAACTTTCCACCTCAATGGTAGTTGGTTAT    |
| query    | TGATGCACAATGGCGTGAGCGAAGAGATCGAACTTTCCACCTCAATGGTAGTTGGTTAT    |
| template | TTATACCAGGGAATACGTGGGCGGATGGCAGCTACACGTTAACGGTGAAAGTAGAAGATA   |
| query    | TTATACCAGGGAATACGTGGGCGGATGGCAGCTACACGTTAACGGTGAAAGTAGAAGATA   |
| template | AGGCAGGAAATACCACTACTCAGCGCCGCTGACGGTCGTTATCGATACCCAAATCGCCA    |
| query    | AGGCAGGAAATACCACTACTCAGCGCCGCTGACGGTCGTTATCGATACCCAAATCGCCA    |
| template | TTGATGGGGTGGAAC TGGTCAACGATAGCGGCGTGAAAGGCGATAATATGACCAACGACG  |
| query    | TTGATGGGGTGGAAC TGGTCAACGATAGCGGCGTGAAAGGCGATAATATGACCAACGACG  |
| template | ACCGTCCCCAC TTTTCGTGTGACGGTACCTACGGATGTCAATGAAGTCCGTCTGAGCATTG |
| query    | ACCGTCCCCAC TTTTCGTGTGACGGTACCTACGGATGTCAATGAAGTCCGTCTGAGCATTG |
| template | ACGGTGGTAA TTCGTGGGTT CAGGCAACTCCGGGCGTGGCAGGAAGCTGGGAGTATATCT |
| query    | ACGGTGGTAA TTCGTGGGTT CAGGCAACTCCGGGCGTGGCAGGAAGCTGGGAGTATATCT |
| template | GGCCGACAGACCTGGCAGATGGTCAATACACGCTAACGGTGGAAGCGACTGATAAAGCAG   |
| query    | GGCCGACAGACCTGGCAGATGGTCAATACACGCTAACGGTGGAAGCGACTGATAAAGCAG   |
| template | GCAATACAGTGACGAAGACCATCGATTTTCGCGGTGGATACCACGCTGTCAGTGCCGGTCA  |
| query    | GCAATACAGTGACGAAGACCATCGATTTTCGCGGTGGATACCACGCTGTCAGTGCCGGTCA  |
| template | TCGTACTGGATAGCGCGGACGACACCGGCATCCAGGGCGATAACATGACGAATAGCACCC   |
| query    | TCGTACTGGATAGCGCGGACGACACCGGCATCCAGGGCGATAACATGACGAATAGCACCC   |
| template | AGCCGACATTTGCCCTGCAGCATATTGATGATGATGCCGTTTCGCGTTACGGTCAGCGTGG  |
| query    | AGCCGACATTTGCCCTGCAGCATATTGATGATGATGCCGTTTCGCGTTACGGTCAGCGTGG  |
| template | AGCATGGCGGCGTCACCACCACATTTGACGCCACGAAAGGCACAGGCGGATGGACCTTTA   |
| query    | AGCATGGCGGCGTCACCACCACATTTGACGCCACGAAAGGCACAGGCGGATGGACCTTTA   |
| template | CGCCGCCGACATCATGGGCGGATGGTGATTATACCCTGAGTGTGTCAGTCGAAGATAAAG   |
| query    | CGCCGCCGACATCATGGGCGGATGGTGATTATACCCTGAGTGTGTCAGTCGAAGATAAAG   |
| template | CGGGGAACACCAGCCATTCTGCATCGCTGACGGTGACGGTGACACGCAAAATCGCCATTA   |
| query    | CGGGGAACACCAGCCATTCTGCATCGCTGACGGTGACGGTGACACGCAAAATCGCCATTA   |
| template | ATAACATTGAACTGGTCAATGACAGCGGTATCCCGACGATAATCTGACTAATAATGTGC    |
| query    | ATAACATTGAACTGGTCAATGACAGCGGTATCCCGACGATAATCTGACTAATAATGTGC    |
| template | GTCCGCACTTCCAGGTGACGGTACCAGCGGATGTCAACGTGGTGCGCCTGAGCATTGACG   |
| query    | GTCCGCACTTCCAGGTGACGGTACCAGCGGATGTCAACGTGGTGCGCCTGAGCATTGACG   |
| template | GCGGCAAGACGTGGTTCAACGCTACCCAGAGCGCAGCCAGGCGTCTGGGATTATATCT     |
| query    | GCGGCAAGACGTGGTTCAACGCTACCCAGAGCGCAGCCAGGCGTCTGGGATTATATCT     |
| template | GGCCGGATGATGTGGCCGACGAGGCTATACCTTGACGGTAGAAGCGACCGATGAGGCGG    |
| query    | GGCCGGATGATGTGGCCGACGAGGCTATACCTTGACGGTAGAAGCGACCGATGAGGCGG    |
| template | GAAATAAGGCAACACAGACGCTCGATTTACCATCGATACCACTGTCTGTGCCGACCC      |
| query    | GAAATAAGGCAACACAGACGCTCGATTTACCATCGATACCACTGTCTGTGCCGACCC      |
| template | TCTCGCTGGACAGCGCAGATGACAGCGGCATCGCGGGCGATAATATCACCAATGTTAAAA   |
| query    | TCTCGCTGGACAGCGCAGATGACAGCGGCATCGCGGGCGATAATATCACCAATGTTAAAA   |

|          |                                                              |
|----------|--------------------------------------------------------------|
| template | CGCCGGGCTTTACCTCAACAATATTGATACCGATGTGACCCGGGTGATAGTGGAGGTAA  |
| query    | CGCCGGGCTTTACCTCAACAATATTGATACCGATGTGACCCGGGTGATAGTGGAGGTAA  |
| template | TGCACAATGGCATTAAACAGGAGGTGCCACTGGTTCAGACCGGCGGACAGTGGCGCTTTG |
| query    | TGCACAATGGCATTAAACAGGAGGTGCCACTGGTTCAGACCGGCGGACAGTGGCGCTTTG |
| template | CGCCGACCAGCGACTGGGCGGACGGCGACTATATCTGACGGTGAAGGTAGAAGATAGGG  |
| query    | CGCCGACCAGCGACTGGGCGGACGGCGACTATATCTGACGGTGAAGGTAGAAGATAGGG  |
| template | CCGGAATGTGAAGCAGTCCGCGCCGTTGACGGTGACAGTAGACACGCATATCGCCATTG  |
| query    | CCGGAATGTGAAGCAGTCCGCGCCGTTGACGGTGACAGTAGACACGCATATCGCCATTG  |
| template | ACCGTATTGAACTGGTTAACGACAGCGGTATCCCGGCGATAATCTGACCAATGAAGCGC  |
| query    | ACCGTATTGAACTGGTTAACGACAGCGGTATCCCGGCGATAATCTGACCAATGAAGCGC  |
| template | GCCCCGACTTTTCAGGTGACAGTACCGGCGGATGTTAACGGTGAAGACTGAGTATTGATG |
| query    | GCCCCGACTTTTCAGGTGACAGTACCGGCGGATGTTAACGGTGAAGACTGAGTATTGATG |
| template | GCGGCAAAACGTGGTTTGACGCCACGCAGAGCGCGACGTCGGGCGTCTGGGATTACACCT |
| query    | GCGGCAAAACGTGGTTTGACGCCACGCAGAGCGCGACGTCGGGCGTCTGGGATTACACCT |
| template | GGCTGACGAATGTGGCTAACGGCCCTCACACCTGATGGTGAAGCGTCCGACAAGGCGG   |
| query    | GGCTGACGAATGTGGCTAACGGCCCTCACACCTGATGGTGAAGCGTCCGACAAGGCGG   |
| template | GAAACAAAACGACGCAGAAACTGGACTTCACCATCGATACCATTCTGTCAGAACCACGA  |
| query    | GAAACAAAACGACGCAGAAACTGGACTTCACCATCGATACCATTCTGTCAGAACCACGA  |
| template | TTACCCTGGACAGCGCGGATGATAGCGCCGCTGGCGATAACATCACCACGTTAAGATGC  |
| query    | TTACCCTGGACAGCGCGGATGATAGCGCCGCTGGCGATAACATCACCACGTTAAGATGC  |
| template | CAGGCTTTACCCTCGGTAATATCGACGCCGACGTGACCAAAGTGGTGGTGACGGTGGCGC |
| query    | CAGGCTTTACCCTCGGTAATATCGACGCCGACGTGACCAAAGTGGTGGTGACGGTGGCGC |
| template | ATGATGGTAAGAACCAACAGATAGAGTTGATTAAGAACGGCGGTGTGTGGCGCTTACGC  |
| query    | ATGATGGTAAGAACCAACAGATAGAGTTGATTAAGAACGGCGGTGTGTGGCGCTTACGC  |
| template | CGGGCGCAGCCTGGACCGATGGCGACTATACGTTGACGGTAAAGGTAGAAGATAAGGCGG |
| query    | CGGGCGCAGCCTGGACCGATGGCGACTATACGTTGACGGTAAAGGTAGAAGATAAGGCGG |
| template | GTAATACAAATTATTCTGCGCCGCTGACGGTGACTATCGATACGCAAACGTCTATTGATC |
| query    | GTAATACAAATTATTCTGCGCCGCTGACGGTGACTATCGATACGCAAACGTCTATTGATC |
| template | GCATTGAGCTTCTTAATGACACGGGTATTGTGCGGGATAACCTGACCAATGAAGCACGTC |
| query    | GCATTGAGCTTCTTAATGACACGGGTATTGTGCGGGATAACCTGACCAATGAAGCACGTC |
| template | CACAGTTTCATATTACGGTACCGACGGACGTGAACCTGTGCAACTGAGTCTTGATGGCG  |
| query    | CACAGTTTCATATTACGGTACCGACGGACGTGAACCTGTGCAACTGAGTCTTGATGGCG  |
| template | GCATCAACTGGGTTAACGCAACGCTGACGTCTGACGGCGTTTGGGAGTATATATGGCCGA |
| query    | GCATCAACTGGGTTAACGCAACGCTGACGTCTGACGGCGTTTGGGAGTATATATGGCCGA |
| template | CAGATCTGGTCGAAAATACGTATACCCTGACAGTGAAAGCAACCGATGTTGCAGGCAACA |
| query    | CAGATCTGGTCGAAAATACGTATACCCTGACAGTGAAAGCAACCGATGTTGCAGGCAACA |
| template | CGGCGACGGAACGCTCAATTTTATCATTGATACCACATTGTCGACACCGACCATCACGC  |
| query    | CGGCGACGGAACGCTCAATTTTATCATTGATACCACATTGTCGACACCGACCATCACGC  |
| template | TGGTAGCGCAGATGATAGCGGCACCGCCAACGATAATAAGACTAACGTTAAAACGCCGG  |
| query    | TGGTAGCGCAGATGATAGCGGCACCGCCAACGATAATAAGACTAACGTTAAAACGCCGG  |
| template | GTTTTATTATCGGCGGTATTGATTCTGACGTGACTCAGGTCGTCGTGCAGGTGATGCGCG |
| query    | GTTTTATTATCGGCGGTATTGATTCTGACGTGACTCAGGTCGTCGTGCAGGTGATGCGCG |
| template | ATGGTCACAGCGAGGAGGTGGAGCTGACGCAGACTAACGGGCAGTGGCGTTTTGTACCCG |
| query    | ATGGTCACAGCGAGGAGGTGGAGCTGACGCAGACTAACGGGCAGTGGCGTTTTGTACCCG |
| template | GCAGCGCGTGGACTGATGGCGACTATACGCTGACGGTAACGGTGAAAGATGAGGCGGGTA |
| query    | GCAGCGCGTGGACTGATGGCGACTATACGCTGACGGTAACGGTGAAAGATGAGGCGGGTA |
| template | ATATTCGCCACTCAGCGCCGTTGACGGTCACCATCGATACGCAAATCACCATTGACCATA |

|          |                                                               |
|----------|---------------------------------------------------------------|
| query    | ATATTGCGCACTCAGCGCGGTTGACGGTCACCATTGACCAATCACCATTGACCAAT      |
| template | TTGAACTGGTCAATGACAGCGGTATTCCCGACGATAATCTAACTAATAATGTGCGTCCGC  |
| query    | TTGAACTGGTCAATGACAGCGGTATTCCCGACGATAATCTAACTAATAATGTGCGTCCGC  |
| template | ACTTCCAGGTGACGGTACCGACGGATGTCAACGTGGTGCGCCTGAGCATTGACGGCGGTA  |
| query    | ACTTCCAGGTGACGGTACCGACGGATGTCAACGTGGTGCGCCTGAGCATTGACGGCGGTA  |
| template | AGACGTGGTTCAACGCTACCCAGAGCGCGACGCCGGGCGTCTGGGATTATACCTGGCTGG  |
| query    | AGACGTGGTTCAACGCTACCCAGAGCGCGACGCCGGGCGTCTGGGATTATACCTGGCTGG  |
| template | CTGATGTGGGAGAGGGTAAGCATACCCTGACAGTGGAGGCGACCGACAAGGCGGGAAACA  |
| query    | CTGATGTGGGAGAGGGTAAGCATACCCTGACAGTGGAGGCGACCGACAAGGCGGGAAACA  |
| template | AAACGACGCAGCAACTGGACTTCATCATCGATACCCTACTGTGAGAACCGACTATCGTGC  |
| query    | AAACGACGCAGCAACTGGACTTCATCATCGATACCCTACTGTGAGAACCGACTATCGTGC  |
| template | TGGACAGCACGGACGACAGCGGAACAAAAGGCGATCACCTGACCAACGTAAATAAGCCGA  |
| query    | TGGACAGCACGGACGACAGCGGAACAAAAGGCGATCACCTGACCAACGTAAATAAGCCGA  |
| template | CGTTTTTACTGGGCAATATTGACGCAGACGCGCGGTATGTACGGTTGAGGTACAGCATG   |
| query    | CGTTTTTACTGGGCAATATTGACGCAGACGCGCGGTATGTACGGTTGAGGTACAGCATG   |
| template | GCGGCACGAAAGAGGTGCTGACGGCCACCAAGACGCGACCGGCAACTGGAGCGTGACAC   |
| query    | GCGGCACGAAAGAGGTGCTGACGGCCACCAAGACGCGACCGGCAACTGGAGCGTGACAC   |
| template | CGACCGGCACATGGGCAGATGGCGACTATACGCTGACAGTGAGGGTGGAAGATGAGGCGG  |
| query    | CGACCGGCACATGGGCAGATGGCGACTATACGCTGACAGTGAGGGTGGAAGATGAGGCGG  |
| template | GGAACGAAAAACACTCAGCGTCGCTGACGGTCACTGTTGATACCCAAATCACCATTGATG  |
| query    | GGAACGAAAAACACTCAGCGTCGCTGACGGTCACTGTTGATACCCAAATCACCATTGATG  |
| template | TTATTGAACGGTTAATGATAACGGTATTCCCGGCGACAATATGACTAACGACGCCCATC   |
| query    | TTATTGAACGGTTAATGATAACGGTATTCCCGGCGACAATATGACTAACGACGCCCATC   |
| template | CGCAGTTCCGCGTGACGGTACCGGGGACGTTAACGAAGTCAGTCTGAGCATTGACGGTG   |
| query    | CGCAGTTCCGCGTGACGGTACCGGGGACGTTAACGAAGTCAGTCTGAGCATTGACGGTG   |
| template | GCGTGACCTGGGTTAAGGCGACACAGAGCGGACGCCGGGCGTCTGGAATTATACCTGGC   |
| query    | GCGTGACCTGGGTTAAGGCGACACAGAGCGGACGCCGGGCGTCTGGAATTATACCTGGC   |
| template | CGGGCACCGTGCCGGATGGCGACTATACGCTGAATGTGAAAGCGACTGACAATGCGGGTA  |
| query    | CGGGCACCGTGCCGGATGGCGACTATACGCTGAATGTGAAAGCGACTGACAATGCGGGTA  |
| template | ATACGGTGACGGAGACACTCCACTTCACTATTGATACTACGTTGTCGACGCCGGTGATCG  |
| query    | ATACGGTGACGGAGACACTCCACTTCACTATTGATACTACGTTGTCGACGCCGGTGATCG  |
| template | TACTGGATAGCGCGGACGACAGTGGTGTCCATGGCGATAACATGACCAATCACACCCAGC  |
| query    | TACTGGATAGCGCGGACGACAGTGGTGTCCATGGCGATAACATGACCAATCACACCCAGC  |
| template | CGACATTTGCCCTGCAGCATATTGATGATGATGCCGTTTCGCGTTACGGTCAGCGTAGAGC |
| query    | CGACATTTGCCCTGCAGCATATTGATGATGATGCCGTTTCGCGTTACGGTCAGCGTAGAGC |
| template | ATGGCGGCGTCACCACCACATTTGACGCCACGAAAGACGCAGGCGGATGGACCTTTACGC  |
| query    | ATGGCGGCGTCACCACCACATTTGACGCCACGAAAGACGCAGGCGGATGGACCTTTACGC  |
| template | CGACAGGGGCGTGGGCGGATGGTGATTATACCTTGAGTGTGTGAGTCGAAGATAAAGCGG  |
| query    | CGACAGGGGCGTGGGCGGATGGTGATTATACCTTGAGTGTGTGAGTCGAAGATAAAGCGG  |
| template | GGAACACCAGCCATTCTGCATCGCTGACGGTGACGGTGACACGCAAAATCGCCATTAAATA |
| query    | GGAACACCAGCCATTCTGCATCGCTGACGGTGACGGTGACACGCAAAATCGCCATTAAATA |
| template | ACATTGAACGGTCAATGACAGCGGTATTCCCGACGATAATCTGACTAATAACGTGCGTC   |
| query    | ACATTGAACGGTCAATGACAGCGGTATTCCCGACGATAATCTGACTAATAACGTGCGTC   |
| template | CGCACTTCCAGGTGACGGTACCGACTGATGTCAACGTGGTGCGCCTGAGCATTGACGGCG  |
| query    | CGCACTTCCAGGTGACGGTACCGACTGATGTCAACGTGGTGCGCCTGAGCATTGACGGCG  |
| template | GCAAGACGTGGTTCAACGCGACCCAGAGCGCGACGCCGGGTGTCTGGGATTATACCTGGC  |
| query    | GCAAGACGTGGTTCAACGCGACCCAGAGCGCGACGCCGGGTGTCTGGGATTATACCTGGC  |

|          |                                                                |
|----------|----------------------------------------------------------------|
| template | TGGCTGATGTGGGAGAGGGGAAGCATACCCTGACAGTGGAGGCGACCGACAAGGCGGGAA   |
| query    | TGGCTGATGTGGGAGAGGGGAAGCATACCCTGACAGTGGAGGCGACCGACAAGGCGGGAA   |
| template | ACAAAACGACGCAGCAACTGGACTTCATCATCGATACCCTACTGTGACAACCGACTATCG   |
| query    | ACAAAACGACGCAGCAACTGGACTTCATCATCGATACCCTACTGTGACAACCGACTATCG   |
| template | TGCTGGACAACACGGACGACAGCGGAACAAAAGGCGATAACCTGACCAACGTAAATAAGC   |
| query    | TGCTGGACAACACGGACGACAGCGGAACAAAAGGCGATAACCTGACCAACGTAAATAAGC   |
| template | CGACGTTTTTACTGGGCAATATTGACGCAGACGCGCGGTATGTCACGGTTGAGGTGCAAC   |
| query    | CGACGTTTTTACTGGGCAATATTGACGCAGACGCGCGGTATGTCACGGTTGAGGTGCAAC   |
| template | ATGGCGGCACGAAAGAAGTGCTGACGGCCACCAAGGCGCGACCGGCATCTGGAGCGTGA    |
| query    | ATGGCGGCACGAAAGAAGTGCTGACGGCCACCAAGGCGCGACCGGCATCTGGAGCGTGA    |
| template | CACCGACCGGCACATGGGCAGATGGCGACTATACGCTGACGGTGAGGGTGAGGATGATG    |
| query    | CACCGACCGGCACATGGGCAGATGGCGACTATACGCTGACGGTGAGGGTGAGGATGATG    |
| template | CGGGGAACGTAAAATACTCAGCGCCGCTGACGGTCACGGTTGACACCCAAATCACCATCG   |
| query    | CGGGGAACGTAAAATACTCAGCGCCGCTGACGGTCACGGTTGACACCCAAATCACCATCG   |
| template | ATGTTATTGAACTGGTTAATGATAACGGTATTCCCGGCGACAACCTGACCAATGACGTTT   |
| query    | ATGTTATTGAACTGGTTAATGATAACGGTATTCCCGGCGACAACCTGACCAATGACGTTT   |
| template | GTCCACACTTCCGCGTCACGGTGCCAGGGGATGTCAACGAGGTACGTCGAGTATCGACG    |
| query    | GTCCACACTTCCGCGTCACGGTGCCAGGGGATGTCAACGAGGTACGTCGAGTATCGACG    |
| template | GCGGTAATACGTGGGTTCTGTGCAACACAGGGGCACGGCAGGGATCTGGGATTACACCTGGC |
| query    | GCGGTAATACGTGGGTTCTGTGCAACACAGGGGCACGGCAGGGATCTGGGATTACACCTGGC |
| template | CGAAAAGATGTGACCGACGGGTACATACCCTGACGGTAGAAGCGACCGATAAGGCGGGAA   |
| query    | CGAAAAGATGTGACCGACGGGTACATACCCTGACGGTAGAAGCGACCGATAAGGCGGGAA   |
| template | ATAAGACGACGCAGACGCTCGATTTTACCATTGATACCCGGCTGTCAACGCCTACCATCG   |
| query    | ATAAGACGACGCAGACGCTCGATTTTACCATTGATACCCGGCTGTCAACGCCTACCATCG   |
| template | CTATGGATAGCAGGGACGATACAGGTGCCATTGGCGATCATATTACGAGCGTCAAAAGAC   |
| query    | CTATGGATAGCAGGGACGATACAGGTGCCATTGGCGATCATATTACGAGCGTCAAAAGAC   |
| template | CGGGCTTTACTATTGGCAATATTGACGCCGATGCGCACTCGGTCATTTTGCGGATCACAC   |
| query    | CGGGCTTTACTATTGGCAATATTGACGCCGATGCGCACTCGGTCATTTTGCGGATCACAC   |
| template | AGGGCGGCAATAGCCAGGAAGTGACACTAACCAGGTTGGAGGACAGTGCGCTTTACGC     |
| query    | AGGGCGGCAATAGCCAGGAAGTGACACTAACCAGGTTGGAGGACAGTGCGCTTTACGC     |
| template | CAGATGCTGACTGGGCGGACGGTAGCTATACGCTGACGGTAGAGGTAACGGATAACGCAG   |
| query    | CAGATGCTGACTGGGCGGACGGTAGCTATACGCTGACGGTAGAGGTAACGGATAACGCAG   |
| template | GAAACGTTTCGTCAGTCCACGCCGCTGGTGGTGACGGTGGACACGCAAAACGACATTACTG  |
| query    | GAAACGTTTCGTCAGTCCACGCCGCTGGTGGTGACGGTGGACACGCAAAACGACATTACTG  |
| template | ATATTACATTGGTCAATGATCATGGCGTGCCTGATGACAATCTAACTAATAGCACCCGTC   |
| query    | ATATTACATTGGTCAATGATCATGGCGTGCCTGATGACAATCTAACTAATAGCACCCGTC   |
| template | CGCAGTTTGAGATCACGGTGCCGGCGGATGTGAATTCTGTGCAACTGAGCATTGATGGGG   |
| query    | CGCAGTTTGAGATCACGGTGCCGGCGGATGTGAATTCTGTGCAACTGAGCATTGATGGGG   |
| template | GCGCAAACTGGGTGAGCGCGACGCAGGGTATCGAAGGCGTCTGGGGCTATACCTGGCCAA   |
| query    | GCGCAAACTGGGTGAGCGCGACGCAGGGTATCGAAGGCGTCTGGGGCTATACCTGGCCAA   |
| template | CGGATATGGGCGATGGAAAACACACCCTAACCGTCATGGTCACCGACAGAGCGGGCAATA   |
| query    | CGGATATGGGCGATGGAAAACACACCCTAACCGTCATGGTCACCGACAGAGCGGGCAATA   |
| template | CGGCGACGCAAAACGCTTGAATTTTTTCATCGACACCCGGTTGTCGACGCCGACCATTGCGC |
| query    | CGGCGACGCAAAACGCTTGAATTTTTTCATCGACACCCGGTTGTCGACGCCGACCATTGCGC |
| template | TGGTAGCACGGATGATACCGGTACGCCTGGCGATGATATGACCAATCGCACCCGACCGA    |
| query    | TGGTAGCACGGATGATACCGGTACGCCTGGCGATGATATGACCAATCGCACCCGACCGA    |

|                |                                                                                                                                  |
|----------------|----------------------------------------------------------------------------------------------------------------------------------|
| template query | CCTTTATTCTGCAGAATATCGATTTCGGATGTTATCAACGTTACAGTCAGCGTCACGCATA                                                                    |
| template query | ATGGAACGACAACCTCGTTTACTGCGACACAGGGGGCTGGAGGATGGAGCTTTACACCGC<br>ATGGAACGACAACCTCGTTTACTGCGACACAGGGGGCTGGAGGATGGAGCTTTACACCGC     |
| template query | CAGCGCCGTGGGGCGACGGTGATTATACGCTGACGGTGACAGTGAGGATCGGGCGGGAA<br>CAGCGCCGTGGGGCGACGGTGATTATACGCTGACGGTGACAGTGAGGATCGGGCGGGAA       |
| template query | ATACGCGTCCGTCTACGCCGTGACGGTGACAGTGGATACGCAAATAGCCATTGATCGTA<br>ATACGCGTCCGTCTACGCCGTGACGGTGACAGTGGATACGCAAATAGCCATTGATCGTA       |
| template query | TTGAATTAGTCAACGATAGCGGCGTCCCTGGCGATAATGTGACAAAACATGTGCGTCCGC<br>TTGAATTAGTCAACGATAGCGGCGTCCCTGGCGATAATGTGACAAAACATGTGCGTCCGC     |
| template query | AGTTCCAGATCTCGGTACCGGATGATGTGAAAAAGGTTCTTCTGAGTATTGACGGCGGCA<br>AGTTCCAGATCTCGGTACCGGATGATGTGAAAAAGGTTCTTCTGAGTATTGACGGCGGCA     |
| template query | CGACCTGGGTTACTGCAATCAAGAGTTCGACGGCTGGCATTGGGATTACACCTGGCCGA<br>CGACCTGGGTTACTGCAATCAAGAGTTCGACGGCTGGCATTGGGATTACACCTGGCCGA       |
| template query | CGGATATGCCAGAGGGACAGCATACCCTGACCGTGGAAGTGACTIONGACGGTGCGGTAATA<br>CGGATATGCCAGAGGGACAGCATACCCTGACCGTGGAAGTGACTIONGACGGTGCGGTAATA |
| template query | AGATGACGGAGACGCTCAATTTCACTATCGATATCACGTTGTTAACGCCAACCATGAGC<br>AGATGACGGAGACGCTCAATTTCACTATCGATATCACGTTGTTAACGCCAACCATGAGC       |
| template query | TAGCGCCCGATCAGGATACCGGACAGAATAAGAACGATAATCTGACCAGCGTCACTCAGC<br>TAGCGCCCGATCAGGATACCGGACAGAATAAGAACGATAATCTGACCAGCGTCACTCAGC     |
| template query | CGGTATTTGTGTTGGGGAGTATCGATAAAGATGTTGACACGTGGAATTGAGTATTGAGC<br>CGGTATTTGTGTTGGGGAGTATCGATAAAGATGTTGACACGTGGAATTGAGTATTGAGC       |
| template query | ATAACGGCACGTTTAAAACGGTGGTACTCACCGAATCAGCCGACGGCTGGCGCTATCGAC<br>ATAACGGCACGTTTAAAACGGTGGTACTCACCGAATCAGCCGACGGCTGGCGCTATCGAC     |
| template query | CGGATTCTGCTTTGGCGGACGGTAGCTACACATTACCGTGACGGTAACAGATGTGGCAG<br>CGGATTCTGCTTTGGCGGACGGTAGCTACACATTACCGTGACGGTAACAGATGTGGCAG       |
| template query | GCAACCAGCAAACATCCGCGCCTTTAAAGGTGACGATAGACGGTACGTTGACTACGCCGG<br>GCAACCAGCAAACATCCGCGCCTTTAAAGGTGACGATAGACGGTACGTTGACTACGCCGG     |
| template query | TGATTGAACTGGCAGCTGGCGAAGATAGCGGTACTGTTGGCGATCGCCTCACCAATCACG<br>TGATTGAACTGGCAGCTGGCGAAGATAGCGGTACTGTTGGCGATCGCCTCACCAATCACG     |
| template query | ATCGGCCTGTGTTGACATACATCAGGTTGATTCTGACGTTACGCGCGTGATGGTCAAAG<br>ATCGGCCTGTGTTGACATACATCAGGTTGATTCTGACGTTACGCGCGTGATGGTCAAAG       |
| template query | TAACTTACAACGGTAAAACGCACGAGGAAGCGGCGGTATTACCAATGGTCAATGGCGCT<br>TAACTTACAACGGTAAAACGCACGAGGAAGCGGCGGTATTACCAATGGTCAATGGCGCT       |
| template query | TTACGCCTTCTGCGAGCTGGGCTGATGGCTCATATCAGTTAGCCGTTGTGGTGGAAGATC<br>TTACGCCTTCTGCGAGCTGGGCTGATGGCTCATATCAGTTAGCCGTTGTGGTGGAAGATC     |
| template query | TGGCGGGGAATGTAAAAGAGTCTGCGCCGTTTGAGGTGCGTATTGATACCACGACAACCA<br>TGGCGGGGAATGTAAAAGAGTCTGCGCCGTTTGAGGTGCGTATTGATACCACGACAACCA     |
| template query | TTAACAATATCGTATTGCTTAATGATACCGGCGTGCGAATGATCAATTAACGAATGTTG<br>TTAACAATATCGTATTGCTTAATGATACCGGCGTGCGAATGATCAATTAACGAATGTTG       |
| template query | CCAAACCGTCATTGAGATTGACGTTCCCGGTGATGTCGTCCAGGTACGCGTAACCCCTGG<br>CCAAACCGTCATTGAGATTGACGTTCCCGGTGATGTCGTCCAGGTACGCGTAACCCCTGG     |
| template query | ATGGTGGCGCTAACTGGAATGTGATACGCAAAAATGCCGACGGACAGTGGATTTTGACA<br>ATGGTGGCGCTAACTGGAATGTGATACGCAAAAATGCCGACGGACAGTGGATTTTGACA       |
| template query | GCCCCAATACTCTGGTTGACGGCACATATACCTTCGCGTAGAGGCCACGGATGAGGCAG<br>GCCCCAATACTCTGGTTGACGGCACATATACCTTCGCGTAGAGGCCACGGATGAGGCAG       |
| template       | GTAATATTGCGAATAAAGATTTAGTATTTAATATCGATACTAATATACAGGTTCTACTA                                                                      |



|          |                                                               |
|----------|---------------------------------------------------------------|
| query    | GTAATATTGCGAATAAAGATTTAGTATTTAATATCGATCAATATACAGGTTCCCTACTA   |
| template | TTGCTTTAGACGCAGGACAAGATACCGGAGCGAATACCGCCGATAATATTACTAATATTT  |
| query    | TTGCTTTAGACGCAGGACAAGATACCGGAGCGAATACCGCCGATAATATTACTAATATTT  |
| template | CACGACCCACCTTTACGATTGGTAATGTTGACCCCGATGTTATCAAAGTCGTGGTGACGA  |
| query    | CACGACCCACCTTTACGATTGGTAATGTTGACCCCGATGTTATCAAAGTCGTGGTGACGA  |
| template | TTGATGGTCATGATTATAACGCGACTAAGGTTGGGGCTGGTTGGCAATTTACACCAGGCA  |
| query    | TTGATGGTCATGATTATAACGCGACTAAGGTTGGGGCTGGTTGGCAATTTACACCAGGCA  |
| template | ATGCCATTCCGGATGGTTCCTATAATATTACCGTTACGGTTGAAGATAAAGCCGGAAATA  |
| query    | ATGCCATTCCGGATGGTTCCTATAATATTACCGTTACGGTTGAAGATAAAGCCGGAAATA  |
| template | CCGCGACATCGAAACCATTACCTGTTGTGATAGATACGACGGCTGAAATTGAAAGCGTCA  |
| query    | CCGCGACATCGAAACCATTACCTGTTGTGATAGATACGACGGCTGAAATTGAAAGCGTCA  |
| template | CGTTGGTTACAGATAGCGGTGATAGCGATGTAGATAACATTACCAAAGTCGACAAGCCGC  |
| query    | CGTTGGTTACAGATAGCGGTGATAGCGATGTAGATAACATTACCAAAGTCGACAAGCCGC  |
| template | AGTTTAGTATTGTTACCGCTGATGATATTACCCATGTGCGCGTTAAAAATCGATAACGCCG |
| query    | AGTTTAGTATTGTTACCGCTGATGATATTACCCATGTGCGCGTTAAAAATCGATAACGCCG |
| template | CTAATTGGATTGAACTCACAAAAGGAGGGGATGGCCGCTGGATATTTAATGTCGGTTCGG  |
| query    | CTAATTGGATTGAACTCACAAAAGGAGGGGATGGCCGCTGGATATTTAATGTCGGTTCGG  |
| template | CATTACCTGATGGGCAACACACTCTCTTGTTGATGTGACTGATATCGCCGGCAACGTTG   |
| query    | CATTACCTGATGGGCAACACACTCTCTTGTTGATGTGACTGATATCGCCGGCAACGTTG   |
| template | CGCAAGAAACGCTGCAGTTTACGATTGATACGACTCTGCGAGAGCCGACAATTGTACTCG  |
| query    | CGCAAGAAACGCTGCAGTTTACGATTGATACGACTCTGCGAGAGCCGACAATTGTACTCG  |
| template | ATCCCACCCATGATACTGGTGATGATACTAATGATAATCTTACCAGGATTAACAAACCGG  |
| query    | ATCCCACCCATGATACTGGTGATGATACTAATGATAATCTTACCAGGATTAACAAACCGG  |
| template | TGTTTATTATCGGTAATGTCGATAATGATGTATCACACATTGTGGTTCATATTGATGGTC  |
| query    | TGTTTATTATCGGTAATGTCGATAATGATGTATCACACATTGTGGTTCATATTGATGGTC  |
| template | GGGATTACACCATGAAAACA CAGGGGGGAATTTAACCTTTACGCCGGATCAACCGCTGT  |
| query    | GGGATTACACCATGAAAAC CAGGGGGGAATTTAACCTTTACGCCGGATCAACCGCTGT   |
| template | CTGACGGTCAGCATACGATCTCTGTTACCGTAACGGATATTGCTGGTAATACCAAAACAT  |
| query    | CTGACGGTCAGCATACGATCTCTGTTACCGTAACGGATATTGCTGGTAATACCAAAACAT  |
| template | CGGCCGAACCTGCGGATTGAAATCGACACGCAGGTTGAGATTGACAGTGTTACGTTAACAA |
| query    | CGGCCGAACCTGCGGATTGAAATCGACACGCAGGTTGAGATTGACAGTGTTACGTTAACAA |
| template | CAGATAGCGGCGTCAACGATCACGATAATGTCACCAATGCTACCCGTCCTCTTTTGAAA   |
| query    | CAGATAGCGGCGTCAACGATCACGATAATGTCACCAATGCTACCCGTCCTCTTTTGAAA   |
| template | TTGCAACGCCGTGATGATGTGACATCGGTGCTGGTTTCTTTGATGGCGTAAACTGGACGC  |
| query    | TTGCAACGCCGTGATGATGTGACATCGGTGCTGGTTTCTTTGATGGCGTAAACTGGACGC  |
| template | CCATCAGTAAAAATGCGGCCGGGCAGTGGGAATTTACTGCAGGTAGCGCATTGCCTGATG  |
| query    | CCATCAGTAAAAATGCGGCCGGGCAGTGGGAATTTACTGCAGGTAGCGCATTGCCTGATG  |
| template | GTCATTATACTCTCCATGTCCAGGCGACGGATCGGGCAGGGAATACGGCAAATTCACGC   |
| query    | GTCATTATACTCTCCATGTCCAGGCGACGGATCGGGCAGGGAATACGGCAAATTCACGC   |
| template | TGGGCTTCACCGTGGATACGCAGATTGACGGCCTGAGCGTCGTGATGCTGGACGACGCCG  |
| query    | TGGGCTTCACCGTGGATACGCAGATTGACGGCCTGAGCGTCGTGATGCTGGACGACGCCG  |
| template | GAAAGGATTCTACGGATGGTATTACGAATATTACCTCTCCACGTTTTGAAATTTACGCCA  |
| query    | GAAAGGATTCTACGGATGGTATTACGAATATTACCTCTCCACGTTTTGAAATTTACGCCA  |
| template | GAGAACCGCTGCAGAGCGTGACGGTAATTTTAAACGGGAAATCCAGCACACTGACTCAGG  |
| query    | GAGAACCGCTGCAGAGCGTGACGGTAATTTTAAACGGGAAATCCAGCACACTGACTCAGG  |
| template | GGGCAGGTAATAAATGGCTGTTTACCCCTGATACACCGTTAGTGGATGGAACCTACAAAA  |
| query    | GGGCAGGTAATAAATGGCTGTTTACCCCTGATACACCGTTAGTGGATGGAACCTACAAAA  |

|          |                                                               |
|----------|---------------------------------------------------------------|
| template | TAGAAATAGTGGCTGAAGATATCGCAGGTAATAAAATTAGCAAAGAGGTATCATTCACAA  |
| query    | TAGAAATAGTGGCTGAAGATATCGCAGGTAATAAAATTAGCAAAGAGGTATCATTCACAA  |
| template | TAGACACTATTGTTTCTGATCCCAGTATTGATTTGCTGGATGCGGATGATACTGGCGAAA  |
| query    | TAGACACTATTGTTTCTGATCCCAGTATTGATTTGCTGGATGCGGATGATACTGGCGAAA  |
| template | GCGCTGTTGATAATATTACGAGTGTCACCTACCCACGTTTCGTTATTGGCAATGTACCCG  |
| query    | GCGCTGTTGATAATATTACGAGTGTCACCTACCCACGTTTCGTTATTGGCAATGTACCCG  |
| template | CCGATATTGATACTGTTGTAATCAGAATTAACGGCGTTTCTTATCCGGTTACGGCAAATG  |
| query    | CCGATATTGATACTGTTGTAATCAGAATTAACGGCGTTTCTTATCCGGTTACGGCAAATG  |
| template | GCAATAACCTCTGGGAATTTAGGTTCCCGTTGCGTTAAACGATGGCGTATATGAAGCCG   |
| query    | GCAATAACCTCTGGGAATTTAGGTTCCCGTTGCGTTAAACGATGGCGTATATGAAGCCG   |
| template | TTGTTGTCTTCAGAGATATTGCCGAAATACTTCTGAAACTAAGCTGCCCTTACCATTG    |
| query    | TTGTTGTCTTCAGAGATATTGCCGAAATACTTCTGAAACTAAGCTGCCCTTACCATTG    |
| template | ATACCACGACAAGCGTCAGTGTGAGAATGGAGCCAGCGTCTGATACCGGAAATTCCAATA  |
| query    | ATACCACGACAAGCGTCAGTGTGAGAATGGAGCCAGCGTCTGATACCGGAAATTCCAATA  |
| template | GCGATAACCTTACGAATAAGCAAAATCCCAAATTCGAAGGTACTGCAGAGCCCAATGCGA  |
| query    | GCGATAACCTTACGAATAAGCAAAATCCCAAATTCGAAGGTACTGCAGAGCCCAATGCGA  |
| template | AACTGGTGATTACCATTGTTGACGATAAGTCAGGTCGGGAGGTTTTAAACAAACGATTA   |
| query    | AACTGGTGATTACCATTGTTGACGATAAGTCAGGTCGGGAGGTTTTAAACAAACGATTA   |
| template | CGGTTGGCGCTGATGGCAACTGGAGTGTGACGCCGAATATACTGCCGGATGGCATGTATA  |
| query    | CGGTTGGCGCTGATGGCAACTGGAGTGTGACGCCGAATATACTGCCGGATGGCATGTATA  |
| template | CCATCAACGTCGTCGAACAGATGTCGCGGGAAATACTGCGCAAACGCAGGAAAGATTCA   |
| query    | CCATCAACGTCGTCGAACAGATGTCGCGGGAAATACTGCGCAAACGCAGGAAAGATTCA   |
| template | CTATCGATACGGTTACGATCGATCCCACCATTGCGCTTTCGGATCCATCTATTGATGATC  |
| query    | CTATCGATACGGTTACGATCGATCCCACCATTGCGCTTTCGGATCCATCTATTGATGATC  |
| template | AGCATGAAGCAACCAGCCTGCGTCCTGAGTTCAAAGGGTTTGCCGAAGCGTTCTCGACGA  |
| query    | AGCATGAAGCAACCAGCCTGCGTCCTGAGTTCAAAGGGTTTGCCGAAGCGTTCTCGACGA  |
| template | TTATGATTCAGTGGGATGGGAAAGTGGTCGGCTCGGCAAACGCCAATGCGAATGGCGAAT  |
| query    | TTATGATTCAGTGGGATGGGAAAGTGGTCGGCTCGGCAAACGCCAATGCGAATGGCGAAT  |
| template | GGAGTTGGACGCCGCCATCAGTATTAGCGCCAGGCTCCTATGTTGTGAGCATTGTTGCCA  |
| query    | GGAGTTGGACGCCGCCATCAGTATTAGCGCCAGGCTCCTATGTTGTGAGCATTGTTGCCA  |
| template | AAGATAAAGCGGGTAATGAATCGTCGCAGGTCGACTTTCCTGTGTAATACCTGTTATTG   |
| query    | AAGATAAAGCGGGTAATGAATCGTCGCAGGTCGACTTTCCTGTGTAATACCTGTTATTG   |
| template | ATGTCACGCCCTCCAACCATAAAGCTCAGCGAGGAGAGCGATAGTGGCGCCTTAGGAGACT |
| query    | ATGTCACGCCCTCCAACCATAAAGCTCAGCGAGGAGAGCGATAGTGGCGCCTTAGGAGACT |
| template | TTACCACGAATAATAAAACGCCGACCCTGATTGGGAGCACGTTACCTAATACGATTGTGA  |
| query    | TTACCACGAATAATAAAACGCCGACCCTGATTGGGAGCACGTTACCTAATACGATTGTGA  |
| template | GTATTTATGTGGATGGCGTGAAGGTCGGCGAGGCGACAGCGGATACAGCGGGTCGATATA  |
| query    | GTATTTATGTGGATGGCGTGAAGGTCGGCGAGGCGACAGCGGATACAGCGGGTCGATATA  |
| template | CTTTCCAGTTATCGGAAATGAAAGATGGCCATTATGTCGTCCAGGTGGGTATCGTCAACC  |
| query    | CTTTCCAGTTATCGGAAATGAAAGATGGCCATTATGTCGTCCAGGTGGGTATCGTCAACC  |
| template | CTCGCGATAATAGCGAACTGCGTTCTACCGCGTTGATGTCACCTATCGATACCGAGGTTG  |
| query    | CTCGCGATAATAGCGAACTGCGTTCTACCGCGTTGATGTCACCTATCGATACCGAGGTTG  |
| template | CTGAACTGGTATGGAATATATCTGGAATGCATGAGGGCGGATATATCAATACGGTGACGC  |
| query    | CTGAACTGGTATGGAATATATCTGGAATGCATGAGGGCGGATATATCAATACGGTGACGC  |
| template | CGGAGATTGGCGGCACCAAGTGAGCCAAACAGCAAAATCACTATCTTTGTGAATGGCGTTG |
| query    | CGGAGATTGGCGGCACCAAGTGAGCCAAACAGCAAAATCACTATCTTTGTGAATGGCGTTG |

|          |                                                               |
|----------|---------------------------------------------------------------|
| template | AAAAAGCGATTGCTTATACGACAGGCGCAGGACACTGGGGCGTAGTATTACCCGCTTTGG  |
| query    | AAAAAGCGATTGCTTATACGACAGGCGCAGGACACTGGGGCGTAGTATTACCCGCTTTGG  |
| template | GTAATGACGGTAATTATGAATTAACGTTTAAAGTTGAAGACGTTGCCGGTAATATCAGAG  |
| query    | GTAATGACGGTAATTATGAATTAACGTTTAAAGTTGAAGACGTTGCCGGTAATATCAGAG  |
| template | AGTTTGGTCCGCAGAATGTAATACTGGATACAGTAATTCGCCGTTAACCGTGGTATTAC   |
| query    | AGTTTGGTCCGCAGAATGTAATACTGGATACAGTAATTCGCCGTTAACCGTGGTATTAC   |
| template | GCGAAGCTGATGACAGTGGCAAAGTTGGCGACTGGATACCAATAAATCTCATGTCACCA   |
| query    | GCGAAGCTGATGACAGTGGCAAAGTTGGCGACTGGATACCAATAAATCTCATGTCACCA   |
| template | TCGATGGTACTGCCGAAGCCGGAAGTACTTTAACCATCAGGAATCCGCAGGGAGTGGTTA  |
| query    | TCGATGGTACTGCCGAAGCCGGAAGTACTTTAACCATCAGGAATCCGCAGGGAGTGGTTA  |
| template | TTGCTACCCTGGTGGTAGGCAATGATGGTCGATGGAGCGCAGAATTAGATCTGCGTGAAG  |
| query    | TTGCTACCCTGGTGGTAGGCAATGATGGTCGATGGAGCGCAGAATTAGATCTGCGTGAAG  |
| template | GTAGTAATGCCTTTGTCGTGGTATCGGAAGATAAAGCGGGCAACAGTCAACAAAAAGAGA  |
| query    | GTAGTAATGCCTTTGTCGTGGTATCGGAAGATAAAGCGGGCAACAGTCAACAAAAAGAGA  |
| template | TTCTGATAGAACATGATACGCAGATTGAAATCAGCGATATTCATTAAGTCGGGATACTA   |
| query    | TTCTGATAGAACATGATACGCAGATTGAAATCAGCGATATTCATTAAGTCGGGATACTA   |
| template | ATAGCGGTGATAAATATGATCTGATTACCAATAATAAGTCTCCGGTACTGGTTGCCATGA  |
| query    | ATAGCGGTGATAAATATGATCTGATTACCAATAATAAGTCTCCGGTACTGGTTGCCATGA  |
| template | CCGATCCCGGCGCGACGGTACAGGTTTATATTAATGGTGTGTTACAAGGCACAGTAGAGG  |
| query    | CCGATCCCGGCGCGACGGTACAGGTTTATATTAATGGTGTGTTACAAGGCACAGTAGAGG  |
| template | CGAGTTCGTCAAGTAATATTAGCTATACCATGCCGGCAAATAGCGCCGACGGCGAGTATC  |
| query    | CGAGTTCGTCAAGTAATATTAGCTATACCATGCCGGCAAATAGCGCCGACGGCGAGTATC  |
| template | AGGTGCAATTTGTTGCTACGGATACTGCTGGTAACCGGGTTGAGTCTGCGATTACAACCG  |
| query    | AGGTGCAATTTGTTGCTACGGATACTGCTGGTAACCGGGTTGAGTCTGCGATTACAACCG  |
| template | TGACAATCGATTCTCAAATTGCTGTCTTTGATATTGATGAAGATTCATTACCGGCCCTCT  |
| query    | TGACAATCGATTCTCAAATTGCTGTCTTTGATATTGATGAAGATTCATTACCGGCCCTCT  |
| template | CTAATAACCGAGCGTTGTCAAGTCTCAGGTGTCGGGGAGGCTGGTTCTCAGGTCAGCATCT |
| query    | CTAATAACCGAGCGTTGTCAAGTCTCAGGTGTCGGGGAGGCTGGTTCTCAGGTCAGCATCT |
| template | TTGTCGATGGTAAATTAGTCAACGTTGTTATGGTTGAGGCTGATGGCACATGGCGCGCGC  |
| query    | TTGTCGATGGTAAATTAGTCAACGTTGTTATGGTTGAGGCTGATGGCACATGGCGCGCGC  |
| template | CGATACTGCTGCAAGATGATGGTACGTTTAATATTCAATTCAGCATTACTGACGTTGCTG  |
| query    | CGATACTGCTGCAAGATGATGGTACGTTTAATATTCAATTCAGCATTACTGACGTTGCTG  |
| template | GCAACACTGAAGTGAGCAAGGATTATAGCGTGGATGTCGATTCATCAACCGACTTCCCAA  |
| query    | GCAACACTGAAGTGAGCAAGGATTATAGCGTGGATGTCGATTCATCAACCGACTTCCCAA  |
| template | CGCTCAACCTTGAAGATGCAAGCAACTCTGGTTCACCTTGACGATCTGATTACTAATCACA |
| query    | CGCTCAACCTTGAAGATGCAAGCAACTCTGGTTCACCTTGACGATCTGATTACTAATCACA |
| template | ACAAGCCTGTATTAGTTGGCACCGCAGAAGCGGGAGCCACAATCCATATTTATGTGGATG  |
| query    | ACAAGCCTGTATTAGTTGGCACCGCAGAAGCGGGAGCCACAATCCATATTTATGTGGATG  |
| template | AAAAGATCGTGGCAAATGTTCTTGTGCTTGAAGATGGAACCTGGTCCTATCAGTTTGATA  |
| query    | AAAAGATCGTGGCAAATGTTCTTGTGCTTGAAGATGGAACCTGGTCCTATCAGTTTGATA  |
| template | ATGCGTTAAAAAGATGGTGAATATTCTATCCGTGTGGTTGCCGAAGACCCGGCAGGTAATA |
| query    | ATGCGTTAAAAAGATGGTGAATATTCTATCCGTGTGGTTGCCGAAGACCCGGCAGGTAATA |
| template | CGGCAGAATCGCCTCGCTTACTCGTCACGATAGATACCAGTACGTTTATCGATAATCCTG  |
| query    | CGGCAGAATCGCCTCGCTTACTCGTCACGATAGATACCAGTACGTTTATCGATAATCCTG  |
| template | CTATGGTGGCAGGTTCGATAATGGTATTTTCAGTAATGATAGTATAACGAGTCAGACCC   |
| query    | CTATGGTGGCAGGTTCGATAATGGTATTTTCAGTAATGATAGTATAACGAGTCAGACCC   |
| template | GGCCTACGTTTAGTATTTTTGGAGAAATGAACCAGAGTGTTTCAGATTTTCATTGATGGAG |

|          |                                                                |
|----------|----------------------------------------------------------------|
| query    | GGCCTACGTTTAGTATTTTGGAGAAATGAACCGAGTGTTTCAGATTTTCATTGATGGAG    |
| template | TGCTAGTCGATACGATCACGGTGACCGACAGAAATCAAGTTTATCGACCTGAGTCACCGT   |
| query    | TGCTAGTCGATACGATCACGGTGACCGACAGAAATCAAGTTTATCGACCTGAGTCACCGT   |
| template | TGGGCGATGGTTCCCATAGCATTTATTATGTTATCACCGATAAAGCAGGCAACACGGCTA   |
| query    | TGGGCGATGGTTCCCATAGCATTTATTATGTTATCACCGATAAAGCAGGCAACACGGCTA   |
| template | CCTCGAAAACGCTAAACTTTACTATCGATACCTTTAATACGACGCCTGTCGCCATTGATT   |
| query    | CCTCGAAAACGCTAAACTTTACTATCGATACCTTTAATACGACGCCTGTCGCCATTGATT   |
| template | CTATCGGTGGACAAACGTTAGCAGAGATGACCGGTAGTGATGGCAAAATATATATAACGG   |
| query    | CTATCGGTGGACAAACGTTAGCAGAGATGACCGGTAGTGATGGCAAAATATATATAACGG   |
| template | ACACGACGCGTAACTTATTGTTTAGTGGCAGTGCCGAGCCCAATAGCAAAATAGAAATCA   |
| query    | ACACGACGCGTAACTTATTGTTTAGTGGCAGTGCCGAGCCCAATAGCAAAATAGAAATCA   |
| template | TCATTAATGGCTTAAATGTGGGGGAAGTTTGGGTTAATGAAAAGGCCACTGGCAGATGC    |
| query    | TCATTAATGGCTTAAATGTGGGGGAAGTTTGGGTTAATGAAAAGGCCACTGGCAGATGC    |
| template | CGGTGAACCCGCTTTATTTACAGAAGGCCAACTGGATATCACTGTTAAATCTACGGACC    |
| query    | CGGTGAACCCGCTTTATTTACAGAAGGCCAACTGGATATCACTGTTAAATCTACGGACC    |
| template | GTGCTGGTAACGTAATCAGGAAAAGTATTCCATTTGGGTTGATACGCATATCAAGGTAT    |
| query    | GTGCTGGTAACGTAATCAGGAAAAGTATTCCATTTGGGTTGATACGCATATCAAGGTAT    |
| template | TTACCAGCGAGCTTGATGACAATAAATCATCATCGAAAACGGAATGGTGGAGTAATAGCG   |
| query    | TTACCAGCGAGCTTGATGACAATAAATCATCATCGAAAACGGAATGGTGGAGTAATAGCG   |
| template | ATCTCATTACCATGCGAGGCACGGGTGAAATTGGCGCTACGGTATCATTAAATCGTGGCTG  |
| query    | ATCTCATTACCATGCGAGGCACGGGTGAAATTGGCGCTACGGTATCATTAAATCGTGGCTG  |
| template | GCGTCACGCTGGCAACTGCTGTTGTGGCGGCAACAGGACGATGGGAATTATCAACAGACA   |
| query    | GCGTCACGCTGGCAACTGCTGTTGTGGCGGCAACAGGACGATGGGAATTATCAACAGACA   |
| template | AGCTTCCAGAAGGGACTTACGATATTAGTTTGGTCATTGAAGATAGCGCCGGAAATCGTT   |
| query    | AGCTTCCAGAAGGGACTTACGATATTAGTTTGGTCATTGAAGATAGCGCCGGAAATCGTT   |
| template | GGGAAGATGTGCGTGAAATATTTATTGACCGAACGCCGCCAAATGCTCCGGTCGTAACGT   |
| query    | GGGAAGATGTGCGTGAAATATTTATTGACCGAACGCCGCCAAATGCTCCGGTCGTAACGT   |
| template | ATTGAGATATTGTCAACGATCTAATTATTATGCAGGGGACGGCGGAAGCCAAATCTCAGC   |
| query    | ATTGAGATATTGTCAACGATCTAATTATTATGCAGGGGACGGCGGAAGCCAAATCTCAGC   |
| template | TAATAATAACCGATAGTGAGGGGAATACTTATACGTTAACCGTTCCCTGATAATGGTAAAT  |
| query    | TAATAATAACCGATAGTGAGGGGAATACTTATACGTTAACCGTTCCCTGATAATGGTAAAT  |
| template | GGAGTATGGCTATCCCGTATCCATCAGAAGGGAAGTTTACCATTACGAGTGTGGATGCTA   |
| query    | GGAGTATGGCTATCCCGTATCCATCAGAAGGGAAGTTTACCATTACGAGTGTGGATGCTA   |
| template | TTGGTAACCGGAGTGATGATGTCCCTCTCGATATCATGAAAAGAGGTTCCCGTTATTTTCAT |
| query    | TTGGTAACCGGAGTGATGATGTCCCTCTCGATATCATGAAAAGAGGTTCCCGTTATTTTCAT |
| template | TATCTCCAGACTCAGACAGTGGTACGGTGGGCGATAATATTACGCGAGATAAGCAACCTA   |
| query    | TATCTCCAGACTCAGACAGTGGTACGGTGGGCGATAATATTACGCGAGATAAGCAACCTA   |
| template | CCTTTATTATCGGGAATCTGGAAGCGATGTTGTGGTCGTTACGGTCGATATCAATGGGA    |
| query    | CCTTTATTATCGGGAATCTGGAAGCGATGTTGTGGTCGTTACGGTCGATATCAATGGGA    |
| template | CCGTATATAATGCTGAAAAAAATGCCGATGGCGTTTGGTTCTTTACGCCAGGTACACCGT   |
| query    | CCGTATATAATGCTGAAAAAAATGCCGATGGCGTTTGGTTCTTTACGCCAGGTACACCGT   |
| template | TAGCTGATGGTTCCCTATACGATATCGGTAATCGCAAGCGATGCCGCGGTAATCAGAAAA   |
| query    | TAGCTGATGGTTCCCTATACGATATCGGTAATCGCAAGCGATGCCGCGGTAATCAGAAAA   |
| template | ACTCGTTACCCATTACTGTCACGATCGACAGCACGCTGACGGTGCCGGAGATTGCGTTGG   |
| query    | ACTCGTTACCCATTACTGTCACGATCGACAGCACGCTGACGGTGCCGGAGATTGCGTTGG   |
| template | CAGCAGGTGAAGACAATGGCGCTTCAGACAGCGATAACGTGACGAATCACACCCAGCCTA   |
| query    | CAGCAGGTGAAGACAATGGCGCTTCAGACAGCGATAACGTGACGAATCACACCCAGCCTA   |

|          |                                                               |
|----------|---------------------------------------------------------------|
| template | AGTTCACGCTGCAGCATATTGATGCTGATGTGACCGGGGTGACCGTAAACGTGACGCATA  |
| query    | AGTTCACGCTGCAGCATATTGATGCTGATGTGACCGGGGTGACCGTAAACGTGACGCATA  |
| template | ATGGCGTGACAGACATCTATCAGGCGACGCAAGGCGCGGATGGCTGGACCTTCACGCCGC  |
| query    | ATGGCGTGACAGACATCTATCAGGCGACGCAAGGCGCGGATGGCTGGACCTTCACGCCGC  |
| template | CAGCCGCCTGGAATGACGGTAACTACACGCTGAGCGTGACGGTGGTGGATCGCGCGGGGA  |
| query    | CAGCCGCCTGGAATGACGGTAACTACACGCTGAGCGTGACGGTGGTGGATCGCGCGGGGA  |
| template | ATTACAGCAATCTGCTTCGCTAGCGGTGACGGTTGACTCAACGGTGACGGTAAACAGCGG  |
| query    | ATTACAGCAATCTGCTTCGCTAGCGGTGACGGTTGACTCAACGGTGACGGTAAACAGCGG  |
| template | ATAGCCAGCATGACGATGCGAGCGATGACGCCACGGCAACAGCGTTACTCCACCGGAGT   |
| query    | ATAGCCAGCATGACGATGCGAGCGATGACGCCACGGCAACAGCGTTACTCCACCGGAGT   |
| template | CTGAAACAGTGAATGCCGAAAGCGCTACGCATCTTCGTACAGAGCCGCTGCGGCGGAAG   |
| query    | CTGAAACAGTGAATGCCGAAAGCGCTACGCATCTTCGTACAGAGCCGCTGCGGCGGAAG   |
| template | AAAGCGTGGTGAAGGTGACAGCCTATAGTATTACATTGTTAAACGCTGACTCTGGGGATG  |
| query    | AAAGCGTGGTGAAGGTGACAGCCTATAGTATTACATTGTTAAACGCTGACTCTGGGGATG  |
| template | AAATAGATCGTTCAATTAGTCAGACACCTTCTTTTGAAATATCAGTACCTGAGAATATTG  |
| query    | AAATAGATCGTTCAATTAGTCAGACACCTTCTTTTGAAATATCAGTACCTGAGAATATTG  |
| template | TTAATGTCAGTATTATGTTTGAAGGAGAAGAGTTTACTCTGCCGATAACTAACCAGAAAG  |
| query    | TTAATGTCAGTATTATGTTTGAAGGAGAAGAGTTTACTCTGCCGATAACTAACCAGAAAG  |
| template | CAATATTCGAAGTCCGCTATCTTTGGAAGATGGTGAATATACTATGGACGTGAAATTCA   |
| query    | CAATATTCGAAGTCCGCTATCTTTGGAAGATGGTGAATATACTATGGACGTGAAATTCA   |
| template | TTGATAAAGACAATGATTTCTTGATTAAGGAGAAAACATTCTCAGTCGATCACTCCTCGG  |
| query    | TTGATAAAGACAATGATTTCTTGATTAAGGAGAAAACATTCTCAGTCGATCACTCCTCGG  |
| template | CGGATATTGTGAACGCAATGAATGTAAGAGGAAAAGACCGAGGATGATATTAATGATTCCC |
| query    | CGGATATTGTGAACGCAATGAATGTAAGAGGAAAAGACCGAGGATGATATTAATGATTCCC |
| template | CTTCCACGAGTTCTGTAGGGCACAACAATAACGGCGCTATTGATGTTTTCGCCGTTAATG  |
| query    | CTTCCACGAGTTCTGTAGGGCACAACAATAACGGCGCTATTGATGTTTTCGCCGTTAATG  |
| template | AAGTTACGCTACCTGTAGATAATCAAGAAGAACACGCATAATAACGGAGGCCCTCACCT   |
| query    | AAGTTACGCTACCTGTAGATAATCAAGAAGAACACGCATAATAACGGAGGCCCTCACCT   |
| template | TTGGGTGAGGGGGTTTACTTATGGATAAAAAACTAGAACCTTATTATTTAAGTGCGGAAA  |
| query    | TTGGGTGAGGGGGTTTACTTATGGATAAAAAACTAGAACCTTATTATTTAAGTGCGGAAA  |
| template | CGGCATTATCTATAGTGTCTAAAAAATTCAACATAAAAAATTGACATCAAAGAGGATGATA |
| query    | CGGCATTATCTATAGTGTCTAAAAAATTCAACATAAAAAATTGACATCAAAGAGGATGATA |
| template | TAAATTTAAGATTTAAAAAGTACGACAGAAATAACACTGACGACTCTATACAAATGAAGA  |
| query    | TAAATTTAAGATTTAAAAAGTACGACAGAAATAACACTGACGACTCTATACAAATGAAGA  |
| template | ATTTCTTTTGTGCGTTAGGGCTTTCTCTACAGGATATATTATTTAATAATGGTGAGGATT  |
| query    | ATTTCTTTTGTGCGTTAGGGCTTTCTCTACAGGATATATTATTTAATAATGGTGAGGATT  |
| template | TACTAAATGAGCCTATGCCGATTTTACTATTAACACCAGAAATGAAGTGGATGGTGTGTG  |
| query    | TACTAAATGAGCCTATGCCGATTTTACTATTAACACCAGAAATGAAGTGGATGGTGTGTG  |
| template | TGAGTGCGGGGCAAAAAATAAAGTTGGTAAACGCGCGCGGTGAACCTCTGTTATGTTGAAA |
| query    | TGAGTGCGGGGCAAAAAATAAAGTTGGTAAACGCGCGCGGTGAACCTCTGTTATGTTGAAA |
| template | TTGAAGATGAATATTTAAAGAGTTATCTGCATTTAGTATACTACCTTTAAATAAAGTTG   |
| query    | TTGAAGATGAATATTTAAAGAGTTATCTGCATTTAGTATACTACCTTTAAATAAAGTTG   |
| template | TTGATAGTATAAGAGTAAAAAATATCATAAAAAACTCTTTATCGATGAACAAGATTTTTT  |
| query    | TTGATAGTATAAGAGTAAAAAATATCATAAAAAACTCTTTATCGATGAACAAGATTTTTT  |
| template | ATACTAAATACTTTTTTCATCTCTTTTTATGGCAATTTTTGCGTTAACTATCCCAGTAT   |
| query    | ATACTAAATACTTTTTTCATCTCTTTTTATGGCAATTTTTGCGTTAACTATCCCAGTAT   |

|                |                                                                                                                                |
|----------------|--------------------------------------------------------------------------------------------------------------------------------|
| template query | TTAGTAATCTGTTCTATGATAAGCTTGTTCGAAGCGCTTCGGTTTCATCTTTATTTGGCG                                                                   |
| template query | TGGCTATAATTGTTGCTGTATTTATTGTTTTGAGTTTATCCTTCGTACTTCGAAAAGATA<br>TGGCTATAATTGTTGCTGTATTTATTGTTTTGAGTTTATCCTTCGTACTTCGAAAAGATA   |
| template query | TTTATCAGTCTATCACAGCAAGGCAGGATGACGTCGATATTGATATCGCATTTCCTGAAG<br>TTTATCAGTCTATCACAGCAAGGCAGGATGACGTCGATATTGATATCGCATTTCCTGAAG   |
| template query | CGGTACTTTATAGTAAAAAGAAAAATGGCAGATCCATGTCATCAGCATTGTGCTATGGA<br>CGGTACTTTATAGTAAAAAGAAAAATGGCAGATCCATGTCATCAGCATTGTGCTATGGA     |
| template query | ATGAGTTTCAGAAAATTAACCCGTTTTATTAAACTCGATCTTCAACGTATAGCCGATA<br>ATGAGTTTCAGAAAATTAACCCGTTTTATTAAACTCGATCTTCAACGTATAGCCGATA       |
| template query | TTCCAATATTTATTATATTTCTCATTGTTATATATGTAAATTTAGGCTCGGTTGTTATTG<br>TTCCAATATTTATTATATTTCTCATTGTTATATATGTAAATTTAGGCTCGGTTGTTATTG   |
| template query | TACCTATTACCATGTTTATCGTCTCTATTATTATTTCCCTCGTTAACCACCATTATACTA<br>TACCTATTACCATGTTTATCGTCTCTATTATTATTTCCCTCGTTAACCACCATTATACTA   |
| template query | ATGAGTTAATGAACAAACAAAAGAAGGACAGAAGAACAGGAATATTTTATCTCAGAAG<br>ATGAGTTAATGAACAAACAAAAGAAGGACAGAAGAACAGGAATATTTTATCTCAGAAG       |
| template query | TTTTCTTATCTATTAAAAATGATCCATACCTTAAATAATCAAGGTTTACTTTTTGATTGGG<br>TTTTCTTATCTATTAAAAATGATCCATACCTTAAATAATCAAGGTTTACTTTTTGATTGGG |
| template query | TTAATACATCAAATGAACAGTCGTATCTTAACCTGAAGATAAGGAAATTAATCTTATCT<br>TTAATACATCAAATGAACAGTCGTATCTTAACCTGAAGATAAGGAAATTAATCTTATCT     |
| template query | ATCAATCTATATTGGGGAGTATGTCATCTATTACCCAAATAACTATTATGGTAATAGCCT<br>ATCAATCTATATTGGGGAGTATGTCATCTATTACCCAAATAACTATTATGGTAATAGCCT   |
| template query | TTTTTATGGTAATCAAGGGTGATGTTACTACTGGCGCAATTGTTTCATCTGTCATTGTCT<br>TTTTTATGGTAATCAAGGGTGATGTTACTACTGGCGCAATTGTTTCATCTGTCATTGTCT   |
| template query | CTGGCCGTATTTCCGGGATCATTTTCGAATTTTTCTTCTACATTAATCTCTATTTTATCAG<br>CTGGCCGTATTTCCGGGATCATTTTCGAATTTTTCTTCTACATTAATCTCTATTTTATCAG |
| template query | CAGAAAAAACCGTAAGGATCTGCTTCTTTTTTTTGATGAAGATCAGGCAGAAAAACAC<br>CAGAAAAAACCGTAAGGATCTGCTTCTTTTTTTTGATGAAGATCAGGCAGAAAAACAC       |
| template query | CGGCATTACAGTCAATATCAAAGTGCAATGGCGATATCTCTATCCGGGGCGTGAGTTATC<br>CGGCATTACAGTCAATATCAAAGTGCAATGGCGATATCTCTATCCGGGGCGTGAGTTATC   |
| template query | AGTATGATGCTCAATCTCCGATGATTATTAACCGACTGTCTATAGACATACCTGCGGGGC<br>AGTATGATGCTCAATCTCCGATGATTATTAACCGACTGTCTATAGACATACCTGCGGGGC   |
| template query | AACGTGTCGCGGTGGTAGGCGAATGCGGAGCAGGAAAAAGCTCATTACTGGGAATGCTAT<br>AACGTGTCGCGGTGGTAGGCGAATGCGGAGCAGGAAAAAGCTCATTACTGGGAATGCTAT   |
| template query | CTGGCTACCTTTCGCCAACAGACGGTGCCATTTTATATGATGGATATAACTTAGGACATT<br>CTGGCTACCTTTCGCCAACAGACGGTGCCATTTTATATGATGGATATAACTTAGGACATT   |
| template query | TATCGCAGAACTTTTTTCTCAGCATTTAAGCGTGGTGACGACACATGATGTTTTATTCA<br>TATCGCAGAACTTTTTTCTCAGCATTTAAGCGTGGTGACGACACATGATGTTTTATTCA     |
| template query | CCGGAACCATTGAAAGTAATTTTCGCGTTAAACCGCAAAACGACAGGGGCCGGGTACTCA<br>CCGGAACCATTGAAAGTAATTTTCGCGTTAAACCGCAAAACGACAGGGGCCGGGTACTCA   |
| template query | AGGCGCTTCAGCTGGCGAACTGTGGTTTTATCTTGCAACATCCTATGGGGCTGAAGTTTC<br>AGGCGCTTCAGCTGGCGAACTGTGGTTTTATCTTGCAACATCCTATGGGGCTGAAGTTTC   |
| template query | CGGTGAATTTTATGGCTAAAAACCTGTCATCCGGACAGCAGCAGCAGTTATTATTAGCAC<br>CGGTGAATTTTATGGCTAAAAACCTGTCATCCGGACAGCAGCAGCAGTTATTATTAGCAC   |
| template query | GTAGTCTGAGTAGTGACGCCAGCGTCTTTTATGGGATGAACCAACATCAAATCTGGATG<br>GTAGTCTGAGTAGTGACGCCAGCGTCTTTTATGGGATGAACCAACATCAAATCTGGATG     |
| template       | AGAATACCGAGAAGCAAATTTTTGATAACTTAGATGAGTTTATTCATGGGAAAACGTTGA                                                                   |

|          |                                                              |
|----------|--------------------------------------------------------------|
| query    | AGAATACCGAGAAGCAAATTTTGTAACTTAGATGAGTTTATTCATGGGAAAACGTTGA   |
| template | TCATGGTGACGCATCGTCGATATCTGATAAAGTATTTTGACCGGGTCTGGTAATGAAAG  |
| query    | TCATGGTGACGCATCGTCGATATCTGATAAAGTATTTTGACCGGGTCTGGTAATGAAAG  |
| template | GTGGAAAAATAATCCGTGATTGTTCTCCGGATAAATTATTAATGTAAAATAAGCAGCGCT |
| query    | GTGGAAAAATAATCCGTGATTGTTCTCCGGATAAATTATTAATGTAAAATAAGCAGCGCT |
| template | TGTCGCTGTTATCAGGTGGTACTGCTTAATAAAAAAGACCCGTTGCACAAACGGGTCTTT |
| query    | TGTCGCTGTTATCAGGTGGTACTGCTTAATAAAAAAGACCCGTTGCACAAACGGGTCTTT |
| template | TTTGTCAITTAACGAGTCGGCAACGCTTCAATAAGTTTAGCTCGATTCTGTTAGGGCTA  |
| query    | TTTGTCAITTAACGAGTCGGCAACGCTTCAATAAGTTTAGCTCGATTCTGTTAGGGCTA  |
| template | TTCCACTTGCCATTTTGGATAAACCACACCTGGCGGCCCTCATCAACGGCAATGCGAGGG |
| query    | TTCCACTTGCCATTTTGGATAAACCACACCTGGCGGCCCTCATCAACGGCAATGCGAGGG |
| template | ACGTGATGGTGCGCAAGGCTACCCCTGGCGCGGATTCCGCGTTGAGATAACCGGTGGGC  |
| query    | ACGTGATGGTGCGCAAGGCTACCCCTGGCGCGGATTCCGCGTTGAGATAACCGGTGGGC  |
| template | GGCTTCAGCGGCAGCGATAGCGTATCAGGTAGCACCATCGGCCATTCTGGCGGGGTCTG  |
| query    | GGCTTCAGCGGCAGCGATAGCGTATCAGGTAGCACCATCGGCCATTCTGGCGGGGTCTG  |

# ***SPI-5\_NC\_003197***

|          |                                                               |
|----------|---------------------------------------------------------------|
| template | CGGAAGTGTGGCCGAGCGGTTGAAGGCACCGGCTTGAAAACCGGCGACCCGAAAGGGTT   |
| query    | CGGAAGTGTGGCCGAGCGGTTGAAGGCACCGGCTTGAAAACCGGCGACCCGAAAGGGTT   |
| template | CCAGAGTTCGAATCTCTGCGCTTCCGCCAGATTAACAAGGGGTTACCGAAAGGTAGCCC   |
| query    | CCAGAGTTCGAATCTCTGCGCTTCCGCCAGATTAACAAGGGGTTACCGAAAGGTAGCCC   |
| template | CTTTGTTTTTTTAGGCGCTATAGAATATAGTTAGAAAATACTGTTAGAATATTTCCCGAA  |
| query    | CTTTGTTTTTTTAGGCGCTATAGAATATAGTTAGAAAATACTGTTAGAATATTTCCCGAA  |
| template | AAAACGGACTACGCGAGTCTTTAGTTTCTTTTCGTTTCCCGATGTGTCTATTTATTGAAG  |
| query    | AAAACGGACTACGCGAGTCTTTAGTTTCTTTTCGTTTCCCGATGTGTCTATTTATTGAAG  |
| template | ATGTAGACCATTCTGGGAGGTGAAGGATGCCCATCTCTTTCAGAATAATGTTGGTATAT   |
| query    | ATGTAGACCATTCTGGGAGGTGAAGGATGCCCATCTCTTTCAGAATAATGTTGGTATAT   |
| template | TCGACAACAGGGCCTCTTGATGATTTTCTTCTTTATCCTGAAGATGGGTACGGGCATGT   |
| query    | TCGACAACAGGGCCTCTTGATGATTTTCTTCTTTATCCTGAAGATGGGTACGGGCATGT   |
| template | ACAACTTCATGAATAAATGAACGTTTTGTGTCAAAAAGTTGTCTTCCTTCGTTACTTTCA  |
| query    | ACAACTTCATGAATAAATGAACGTTTTGTGTCAAAAAGTTGTCTTCCTTCGTTACTTTCA  |
| template | TAATGTTTCGGTATATGAATCATCAGAATCGTCCAGATTGAGACAAATAACTTTCTGCCT  |
| query    | TAATGTTTCGGTATATGAATCATCAGAATCGTCCAGATTGAGACAAATAACTTTCTGCCT  |
| template | TCTGAAAGTTTGAAGTGTCTCTGAGCCACGGTAGTTTCAAAGGCTTCGCCTGCCCCAGT   |
| query    | TCTGAAAGTTTGAAGTGTCTCTGAGCCACGGTAGTTTCAAAGGCTTCGCCTGCCCCAGT   |
| template | AGCCAGCGCTGCTCCACATCATGTAGTTCTTTTTCATATGCGTAATTCATCAGTCTGCGG  |
| query    | AGCCAGCGCTGCTCCACATCATGTAGTTCTTTTTCATATGCGTAATTCATCAGTCTGCGG  |
| template | AATGTTTCGCTTTGGGTATACGCATTTTGAAGTACGGAGGATAGTTCATCGTAGCATTCTG |
| query    | AATGTTTCGCTTTGGGTATACGCATTTTGAAGTACGGAGGATAGTTCATCGTAGCATTCTG |
| template | TCATAAGTGTGTCATCAATTTCTGTATCAGGGTCTATTCCACCCGCGCCTGAGATAAGG   |
| query    | TCATAAGTGTGTCATCAATTTCTGTATCAGGGTCTATTCCACCCGCGCCTGAGATAAGG   |
| template | TACTCCACCACACACTCTGGCTCCAGACGGAATTCACTGTTTATGGCAAGGCTGTCATGA  |
| query    | TACTCCACCACACACTCTGGCTCCAGACGGAATTCACTGTTTATGGCAAGGCTGTCATGA  |
| template | GCAAGGCGTAGCCGTGAGGGGTTTGGTGATGTTCCGGGAATATCGGGGAAAACAGGTGTA  |
| query    | GCAAGGCGTAGCCGTGAGGGGTTTGGTGATGTTCCGGGAATATCGGGGAAAACAGGTGTA  |
| template | TCTGCGGTATTTAATCTATATGTGGATACTCCGCTTTGAGGTATTAATCTGTAGGTGACC  |

|          |                                                                |
|----------|----------------------------------------------------------------|
| query    | TCTGCGGTATTTAATCTATATGTGGATACTCCGCTTTGAGGTATTAACTCTGTAGGTGACC  |
| template | GGAAGCATAA CTTCTTATTTCTGACTACAATTATGAATTATTTAAATTAACAATAATA    |
| query    | GGAAGCATAA CTTCTTATTTCTGACTACAATTATGAATTATTTAAATTAACAATAATA    |
| template | GTGTTTTAGTTAATGTGCCACATACAGGTAACGCTATGATTAGACAAAGCCAACAAGT     |
| query    | GTGTTTTAGTTAATGTGCCACATACAGGTAACGCTATGATTAGACAAAGCCAACAAGT     |
| template | AATACGCTGAAAA GTTATTTATAATGAAACTTAGGGGCGGGGTTTATTTAATAAAACAA   |
| query    | AATACGCTGAAAA GTTATTTATAATGAAACTTAGGGGCGGGGTTTATTTAATAAAACAA   |
| template | GGGGGCCTCTGTTTGAATACTTCTTGTTTATAAAATCCCTTTATCTCGACTAAAATATCG   |
| query    | GGGGGCCTCTGTTTGAATACTTCTTGTTTATAAAATCCCTTTATCTCGACTAAAATATCG   |
| template | GATGGGGGAAAAGAGTTCTATCATTGTAATCCGGGAGTGGAGTAGGGGTATGTTGACTAC   |
| query    | GATGGGGGAAAAGAGTTCTATCATTGTAATCCGGGAGTGGAGTAGGGGTATGTTGACTAC   |
| template | CTGTCAGATCGGCTCCTGTTAATGCTTTCGCTAAAGTTAGAGCTATCTTATCTAATTTTCG  |
| query    | CTGTCAGATCGGCTCCTGTTAATGCTTTCGCTAAAGTTAGAGCTATCTTATCTAATTTTCG  |
| template | CACCATTTAGTTTGGTGTCA GTTTAAGTCTGAGCCGAATAGAATTGCAGCGGTTAAGTTTA |
| query    | CACCATTTAGTTTGGTGTCA GTTTAAGTCTGAGCCGAATAGAATTGCAGCGGTTAAGTTTA |
| template | CACCGGACATGTTAGCGCAAGTCAGGTCTGCGTGAGTCAGGTTTGCTTTAGTCATGTTTG   |
| query    | CACCGGACATGTTAGCGCAAGTCAGGTCTGCGTGAGTCAGGTTTGCTTTAGTCATGTTTG   |
| template | AACCCATTAGATTTACAGCGTGTAGATTTGCACAACACAAATTTGCACCGACTAAATTTA   |
| query    | AACCCATTAGATTTACAGCGTGTAGATTTGCACAACACAAATTTGCACCGACTAAATTTA   |
| template | CATTAGATAGAGTTGTTTCACGGAAATCTGCATTAGAAGCATCTATTTTTGACAAATCTT   |
| query    | CATTAGATAGAGTTGTTTCACGGAAATCTGCATTAGAAGCATCTATTTTTGACAAATCTT   |
| template | CCCCCTGGAAATCTTTATGAGCCAGGTTTACTCCGCGCAGGTTCAGAAAACCATCCTCGG   |
| query    | CCCCCTGGAAATCTTTATGAGCCAGGTTTACTCCGCGCAGGTTCAGAAAACCATCCTCGG   |
| template | TTATAAGTGAATCAGGCTGTTGTATATTATGTTTACTCATCAGTTTTAACATTTCGACATA  |
| query    | TTATAAGTGAATCAGGCTGTTGTATATTATGTTTACTCATCAGTTTTAACATTTCGACATA  |
| template | CATTCCAAAATCTCTCACTATCAACTTTATCCGTTACAGTTTTTCCATTTTTGTTCACTT   |
| query    | CATTCCAAAATCTCTCACTATCAACTTTATCCGTTACAGTTTTTCCATTTTTGTTCACTT   |
| template | CAATAATGACCATGGGATCCGTATTTTCGGATGCTGCTCCACATGACAGACATATAGTAC   |
| query    | CAATAATGACCATGGGATCCGTATTTTCGGATGCTGCTCCACATGACAGACATATAGTAC   |
| template | ACCCGTTGACATCCTCCAGAAATATTTTATTACCATCGAAGAAAGCATTTTTATTACAT    |
| query    | ACCCGTTGACATCCTCCAGAAATATTTTATTACCATCGAAGAAAGCATTTTTATTACAT    |
| template | ATAATAATGATGTGGTCAGTTTTCCAATTACCTCCCGAAACCATCTTTCATTGCTTCTTC   |
| query    | ATAATAATGATGTGGTCAGTTTTCCAATTACCTCCCGAAACCATCTTTCATTGCTTCTTC   |
| template | TTACTCCACCACAGGTAAAAAAATTGACAAACCATTCCAGTATACCGCGTGGTGAAGTTG   |
| query    | TTACTCCACCACAGGTAAAAAAATTGACAAACCATTCCAGTATACCGCGTGGTGAAGTTG   |
| template | CACTTTTATTGCTTCTTTTCGTACCGGTACCGGCCGATGCAAAATATCTTAATATATTTT   |
| query    | CACTTTTATTGCTTCTTTTCGTACCGGTACCGGCCGATGCAAAATATCTTAATATATTTT   |
| template | CTGGGGACGCGTTAGTTATTGGCATTTTGATTCTTCTTATGGAAGTGAGCCGACTCCTT    |
| query    | CTGGGGACGCGTTAGTTATTGGCATTTTGATTCTTCTTATGGAAGTGAGCCGACTCCTT    |
| template | ATAGGTGTGAGTCAAGTCACATTTATACAAGGAATAATAAAAAAGATATAAGGTGATTT    |
| query    | ATAGGTGTGAGTCAAGTCACATTTATACAAGGAATAATAAAAAAGATATAAGGTGATTT    |
| template | TTGTATTTAGAGCTTTGGTTGAGTATGAGTAGGTGTCTGGCATCTGACAAGAGGCGATGA   |
| query    | TTGTATTTAGAGCTTTGGTTGAGTATGAGTAGGTGTCTGGCATCTGACAAGAGGCGATGA   |
| template | TATCTGCCATAACGGTGAAGCAGAAGTAATATCACCCGTGAATAATAAGATTATCCTTGC   |
| query    | TATCTGCCATAACGGTGAAGCAGAAGTAATATCACCCGTGAATAATAAGATTATCCTTGC   |
| template | TATTGACTTCCTTCATTTCCAGCATAGCTTACGCTTCATCATCATTGAATAAACAATTAA   |
| query    | TATTGACTTCCTTCATTTCCAGCATAGCTTACGCTTCATCATCATTGAATAAACAATTAA   |



|          |                                                              |
|----------|--------------------------------------------------------------|
| template | GTTTGTGAGCGAAAATTTACTTAAAGAAAAATAATAAGCACCAATATTTTTGCAGTA    |
| query    | GTTTGTGAGCGAAAATTTACTTAAAGAAAAATAATAAGCACCAATATTTTTGCAGTA    |
|          |                                                              |
| template | TTTCAACTTATACCAGAATAAATGCGCGTAGATGGCGTAAAAACCTGATGAGCAGGAATA |
| query    | TTTCAACTTATACCAGAATAAATGCGCGTAGATGGCGTAAAAACCTGATGAGCAGGAATA |
|          |                                                              |
| template | CTTACACACTAAAAATGCTCCCGCAAACAGAGCAAAATGAGAGAGATGAACGTTTGCCCC |
| query    | CTTACACACTAAAAATGCTCCCGCAAACAGAGCAAAATGAGAGAGATGAACGTTTGCCCC |
|          |                                                              |
| template | TTACATTTCCACCAAAGATTCTGGTCTTGCTCTTTGTAAAGGGCATACTATCGCGTTTT  |
| query    | TTACATTTCCACCAAAGATTCTGGTCTTGCTCTTTGTAAAGGGCATACTATCGCGTTTT  |
|          |                                                              |
| template | ATCTCATTAAGAAAGTATGTTGACGTATTAATATGCATAATGCTCTTTCAATTGCTTC   |
| query    | ATCTCATTAAGAAAGTATGTTGACGTATTAATATGCATAATGCTCTTTCAATTGCTTC   |
|          |                                                              |
| template | ACGTTTGAAATGAATAATTCAAACCAAGTGAGCGCCTCTTCTCGGTACTGGTTTGCGGC  |
| query    | ACGTTTGAAATGAATAATTCAAACCAAGTGAGCGCCTCTTCTCGGTACTGGTTTGCGGC  |
|          |                                                              |
| template | AAGCGATAAAGCGCCACTAAAGCAGTATTGTCTGCGTCAGCGCCGATAGTGACGGCGCTG |
| query    | AAGCGATAAAGCGCCACTAAAGCAGTATTGTCTGCGTCAGCGCCGATAGTGACGGCGCTG |
|          |                                                              |
| template | GTGTAGTTCAGACGTAAAAAATGCTGCAAAGTCAGGATGTCGTCAGGCAATGGCATAAAG |
| query    | GTGTAGTTCAGACGTAAAAAATGCTGCAAAGTCAGGATGTCGTCAGGCAATGGCATAAAG |
|          |                                                              |
| template | GGACAGCACATTTCCAGTGTATGATCGGATTCATTAATAAAACCTGTATCCCATCATCA  |
| query    | GGACAGCACATTTCCAGTGTATGATCGGATTCATTAATAAAACCTGTATCCCATCATCA  |
|          |                                                              |
| template | ATGATAAGCAGTGGCTCATCTTCTGGCGCATCCAGGCCTAACGCGTCATATAAACGATT  |
| query    | ATGATAAGCAGTGGCTCATCTTCTGGCGCATCCAGGCCTAACGCGTCATATAAACGATT  |
|          |                                                              |
| template | AATAGACTTTCCATATAGTTACCTCAAGACTCAAGATGTGATTAATGAAGAAATGCCTTT |
| query    | AATAGACTTTCCATATAGTTACCTCAAGACTCAAGATGTGATTAATGAAGAAATGCCTTT |
|          |                                                              |
| template | TACTGACTGCCAAATATTTTCATCCCCAACTCGTTTTTGATAGGAAAGATTGAGCACCTC |
| query    | TACTGACTGCCAAATATTTTCATCCCCAACTCGTTTTTGATAGGAAAGATTGAGCACCTC |
|          |                                                              |
| template | TGGCGATAAATTTTTCATTACTTTGTTTCCCGCCCCGCCGTATTTGTTTCTGAATCTC   |
| query    | TGGCGATAAATTTTTCATTACTTTGTTTCCCGCCCCGCCGTATTTGTTTCTGAATCTC   |
|          |                                                              |
| template | CAGGTTACCGCTATTCAAGTAATACTTTTTGGAAAATTTCTGTCCACCGCTATCCGGAAG |
| query    | CAGGTTACCGCTATTCAAGTAATACTTTTTGGAAAATTTCTGTCCACCGCTATCCGGAAG |
|          |                                                              |
| template | ACTACCAGGCGCACTTAACATATGGGTCTGATGTAAGGAAATGATCTCTCGCTTGATTTC |
| query    | ACTACCAGGCGCACTTAACATATGGGTCTGATGTAAGGAAATGATCTCTCGCTTGATTTC |
|          |                                                              |
| template | TGAATCCATCATCCCTGTACGATCTTGCCGCTTTTACAATTCCAGGCGGGTACCGCGTC  |
| query    | TGAATCCATCATCCCTGTACGATCTTGCCGCTTTTACAATTCCAGGCGGGTACCGCGTC  |
|          |                                                              |
| template | AATTTCATGGGCTAACATGGCAAGGCGTTGTGCGAGTTTATAGGGTTCGCCGCCATCTTT |
| query    | AATTTCATGGGCTAACATGGCAAGGCGTTGTGCGAGTTTATAGGGTTCGCCGCCATCTTT |
|          |                                                              |
| template | ATGATGTTGGTTATTTTTCCATATATCCTTAATCTGGCGCGCTAATGTATTGACGACCTC |
| query    | ATGATGTTGGTTATTTTTCCATATATCCTTAATCTGGCGCGCTAATGTATTGACGACCTC |
|          |                                                              |
| template | ATAATTATCCGGGTATTGCGCCAGCCATTGCGCAACCCAGCCACCTGGTCTGGCTTCAGG |
| query    | ATAATTATCCGGGTATTGCGCCAGCCATTGCGCAACCCAGCCACCTGGTCTGGCTTCAGG |
|          |                                                              |
| template | GCGTAAATCATTGCCTAATAACTGATGTAGCGCCTCGGCATTATAGCTATCCGATGCCTT |
| query    | GCGTAAATCATTGCCTAATAACTGATGTAGCGCCTCGGCATTATAGCTATCCGATGCCTT |
|          |                                                              |
| template | AAGGCCAAAGCCGAGCTTGAGCGCCAGCTCATTAAACCCACATTAAATGCGGCGACGTC  |
| query    | AAGGCCAAAGCCGAGCTTGAGCGCCAGCTCATTAAACCCACATTAAATGCGGCGACGTC  |
|          |                                                              |
| template | CGGTTTTATTTTTACCGTCTGTAGATCGCCATCTTTATTGCGGATTTTTAAATGAATCAT |
| query    | CGGTTTTATTTTTACCGTCTGTAGATCGCCATCTTTATTGCGGATTTTTAAATGAATCAT |
|          |                                                              |
| template | TTTTCCCGGCTGGGTCAACGATTGCCATGCGCGCATTTGGTCCTCGACCATCGTTCCTC  |
| query    | TTTTCCCGGCTGGGTCAACGATTGCCATGCGCGCATTTGGTCCTCGACCATCGTTCCTC  |

|          |                                                               |
|----------|---------------------------------------------------------------|
| template | TTTGCCGAAAAATATTCGACGCGGTGAGTAACCCGACGGATACCACTTTCAGGCTTACCGC |
| query    | TTTGCCGAAAAATATTCGACGCGGTGAGTAACCCGACGGATACCACTTTCAGGCTTACCGC |
| template | CTCGCCCGCTAAGGCTTTGTAAAGCAACTCAGGTTTACTAAAAAGTGCCGCAGTTAATAC  |
| query    | CTCGCCCGCTAAGGCTTTGTAAAGCAACTCAGGTTTACTAAAAAGTGCCGCAGTTAATAC  |
| template | TTCTTTGGCTTTGTTTTAGCGCCGACGTGACGCAGAAGCGGATCTTTTTCATGATAGGG   |
| query    | TTCTTTGGCTTTGTTTTAGCGCCGACGTGACGCAGAAGCGGATCTTTTTCATGATAGGG   |
| template | GGAAAGCACGCCATGACGTATCCCGCAAAAAAGCGTTTTATCTTTACCGTCCTCATGCAC  |
| query    | GGAAAGCACGCCATGACGTATCCCGCAAAAAAGCGTTTTATCTTTACCGTCCTCATGCAC  |
| template | ACTCACCGTGGACATCCACAAATTATTGGCGTGATGAATATTCTTGGTATCCCAACTGCA  |
| query    | ACTCACCGTGGACATCCACAAATTATTGGCGTGATGAATATTCTTGGTATCCCAACTGCA  |
| template | TACGCCCTTTCCCTCATAAGCACTGGGAAAGATATCTTTTGCGCCGATTTTCATCTCTGC  |
| query    | TACGCCCTTTCCCTCATAAGCACTGGGAAAGATATCTTTTGCGCCGATTTTCATCTCTGC  |
| template | TGCAGGGAGCTGCGTGTTGGTATAGTGATGCCCGTTATGCGTGAGTGATTTTTTATGGT   |
| query    | TGCAGGGAGCTGCGTGTTGGTATAGTGATGCCCGTTATGCGTGAGTGATTTTTTATGGT   |
| template | TTGCCAGGGCTGGTTATTAAGCTGCTTGACCTGAGCATCTCTAAACGCTACTGCCGCAAA  |
| query    | TTGCCAGGGCTGGTTATTAAGCTGCTTGACCTGAGCATCTCTAAACGCTACTGCCGCAAA  |
| template | GCGATGAGCTTCTTTTGCAAGTAAGCCATCCTGCTGCTGAGTGCGTGCTGCAATAAGTTC  |
| query    | GCGATGAGCTTCTTTTGCAAGTAAGCCATCCTGCTGCTGAGTGCGTGCTGCAATAAGTTC  |
| template | GATAAGATTTTTCTTCAATGCTTTTGCCGCGGCTTCTTCTTGTTTTGTTGCTGGCCGGTC  |
| query    | GATAAGATTTTTCTTCAATGCTTTTGCCGCGGCTTCTTCTTGTTTTGTTGCTGGCCGGTC  |
| template | CGCTTTAACTTTGGCTAACTCCATTTGGTTTGCCATTGACGTTAGAACCAGGTCTTGTTT  |
| query    | CGCTTTAACTTTGGCTAACTCCATTTGGTTTGCCATTGACGTTAGAACCAGGTCTTGTTT  |
| template | ACCCAGAACGGTTGCCGCGACGGTAAGAAGATCGCGCTGAAGTTATAGAGTTATGCAG    |
| query    | ACCCAGAACGGTTGCCGCGACGGTAAGAAGATCGCGCTGAAGTTATAGAGTTATGCAG    |
| template | CGAGTGGTTAGACGCCTTCTGATGCTGTAGATAATCCCCATGTCGCGCCGGGTTCTCG    |
| query    | CGAGTGGTTAGACGCCTTCTGATGCTGTAGATAATCCCCATGTCGCGCCGGGTTCTCG    |
| template | CAGGACAATAATTTCCGGGCGAGCGTCGGGCGCTTTAGCCGGCGCTTTGCCCTGGCCTGA  |
| query    | CAGGACAATAATTTCCGGGCGAGCGTCGGGCGCTTTAGCCGGCGCTTTGCCCTGGCCTGA  |
| template | GAGAATCTGCATTCCGTTGTATAAGGTTTTTTGTAGGCTTTTAAAGCCTCCTGGGTTTT   |
| query    | GAGAATCTGCATTCCGTTGTATAAGGTTTTTTGTAGGCTTTTAAAGCCTCCTGGGTTTT   |
| template | TAGTGAAGCTGAGTGATAGAAGCTCTGTATTTGCATAGCGTTTTTAATATTCTGAATAG   |
| query    | TAGTGAAGCTGAGTGATAGAAGCTCTGTATTTGCATAGCGTTTTTAATATTCTGAATAG   |
| template | GGGAGTGGGAACATTCAACAGGGTTAACAACCCTTTAAAGGATGTGACTTTTATGCACC   |
| query    | GGGAGTGGGAACATTCAACAGGGTTAACAACCCTTTAAAGGATGTGACTTTTATGCACC   |
| template | AGGAACTTTAAAAAATGTCCTTTTTAATGAGGAAACGCTTCTGATCAGGCGGGGAGGCA   |
| query    | AGGAACTTTAAAAAATGTCCTTTTTAATGAGGAAACGCTTCTGATCAGGCGGGGAGGCA   |
| template | TCCTGACGTCCATACGTAGTGGCGATCATGGGGGAGATCGGTACATCAAATGTTCAAAA   |
| query    | TCCTGACGTCCATACGTAGTGGCGATCATGGGGGAGATCGGTACATCAAATGTTCAAAA   |
| template | ATCTACAACTTCACAATTTATGGCACAACTTTTATTGAAAACCCACCTTCTTGACTCAG   |
| query    | ATCTACAACTTCACAATTTATGGCACAACTTTTATTGAAAACCCACCTTCTTGACTCAG   |
| template | ATCAAATTCACCGATTTACTCCTGCGTAAAGTAACGGCGTTACATCAAATGTTATACAGG  |
| query    | ATCAAATTCACCGATTTACTCCTGCGTAAAGTAACGGCGTTACATCAAATGTTATACAGG  |
| template | TGTGTGTATGCCAGCAAAGCCCCGGACAAGTAAGACCGTGACGAAGAATATTCGTTTTTC  |
| query    | TGTGTGTATGCCAGCAAAGCCCCGGACAAGTAAGACCGTGACGAAGAATATTCGTTTTTC  |
| template | CTATTCCATGCTTGAACAGATAGAATTCGCGTTGAAATCTGAAAAGACGCGGAATTTTTC  |
| query    | CTATTCCATGCTTGAACAGATAGAATTCGCGTTGAAATCTGAAAAGACGCGGAATTTTTC  |
| template | AGCATGGGTAAAAGAGGCCTGTCGGGAAAAGTTATGTAACACGGGACATAAGCTGTAGTT  |

|          |                                                                |
|----------|----------------------------------------------------------------|
| query    | AGCATGGGTAAAAGAGGCCCTGTCCGGAAAAAGTTATGTAACACGGGACATAAGCTGTAGTT |
| template | ATCGTCTTATGTAAGAGGGGGCGGCCATTTTGAAAAGAACAACGTGCTTATATACCTCCT   |
| query    | ATCGTCTTATGTAAGAGGGGGCGGCCATTTTGAAAAGAACAACGTGCTTATATACCTCCT   |
| template | GGGTTTTTGCCGCTTTTGTCTCTCTGCTGATATTTGCCTGGAGTGCATAAACTATCCTC    |
| query    | GGGTTTTTGCCGCTTTTGTCTCTCTGCTGATATTTGCC TGGAGTGCATAAACTATCCTC   |
| template | TCTATGAATCCATAATAATTATTGTCTTTTATATCTGGCTAATTCTGGTACCGCTTTATC   |
| query    | TCTATGAATCCATAATAATTATTGTCTTTTATATCTGGCTAATTCTGGTACCGCTTTATC   |
| template | TTATTGTGTATGAGTGGCTAATAGATTGTCATTAAATTTATGGCTGCGTACTTGAAAAGT   |
| query    | TTATTGTGTATGAGTGGCTAATAGATTGTCATTAAATTTATGGCTGCGTACTTGAAAAGT   |
| template | GATATTTCATATCTGTACGGTAAGTCATTGTCGTAATAATATTATTGGTCAGGCGACGGG   |
| query    | GATATTTCATATCTGTACGGTAAGTCATTGTCGTAATAATATTATTGGTCAGGCGACGGG   |
| template | CGAGCGTCTGCGCATTTTGCATCGTTTTATCTTCAAAATTTTGCAGTAAGCGTTGCGCTT   |
| query    | CGAGCGTCTGCGCATTTTGCATCGTTTTATCTTCAAAATTTTGCAGTAAGCGTTGCGCTT   |
| template | CTTTCGGATGCGACGCATATAATCTCAGATAGCTCTGCTCCATCTTATACTGCTGCTTAG   |
| query    | CTTTCGGATGCGACGCATATAATCTCAGATAGCTCTGCTCCATCTTATACTGCTGCTTAG   |
| template | CTGTTTGCTGTTCAAATGTTTTCCAGGCGTGTTGCACATCTGGCGCAAACGCATTGTAGT   |
| query    | CTGTTTGCTGTTCAAATGTTTTCCAGGCGTGTTGCACATCTGGCGCAAACGCATTGTAGT   |
| template | CCTGCATAACCAGCGTTTGCAGCGTGCGGAATGTCCAGTAGGTAGAGTCGTTGCTCGCCC   |
| query    | CCTGCATAACCAGCGTTTGCAGCGTGCGGAATGTCCAGTAGGTAGAGTCGTTGCTCGCCC   |
| template | GATCGGTTCCCTTTATCATCTCCGGTTGATAATGACGCATCCCCTGATAATAGGGGAGAT   |
| query    | GATCGGTTCCCTTTATCATCTCCGGTTGATAATGACGCATCCCCTGATAATAGGGGAGAT   |
| template | AGACGCTAAGAGATGGCATTCCATAGGCGATGTATTCTACGTTGCCGATAGCCTGCGGTA   |
| query    | AGACGCTAAGAGATGGCATTCCATAGGCGATGTATTCTACGTTGCCGATAGCCTGCGGTA   |
| template | ATTTCCGGTCTGACCTGTAAAAATATGTGACTCCTGGGTACGAAAAACGGATATAGGTCGCC |
| query    | ATTTCCGGTCTGACCTGTAAAAATATGTGACTCCTGGGTACGAAAAACGGATATAGGTCGCC |
| template | ATGGTTCCTGTGGATTATGACTGGCATAAGGGTCGTGCGACGTTCCCTGATAGTGATTGC   |
| query    | ATGGTTCCTGTGGATTATGACTGGCATAAGGGTCGTGCGACGTTCCCTGATAGTGATTGC   |
| template | GTAGCGCGTTTTTTTACTGCCGCCACGCTGATCTTCGTTATTGGCGTTAAAAAACAGGAA   |
| query    | GTAGCGCGTTTTTTTACTGCCGCCACGCTGATCTTCGTTATTGGCGTTAAAAAACAGGAA   |
| template | ATGTTTCCCTTCGCTAACGACCGTATCCAGATGCGGATTAACCTGGTGTGTAGCGTCC     |
| query    | ATGTTTCCCTTCGCTAACGACCGTATCCAGATGCGGATTAACCTGGTGTGTAGCGTCC     |
| template | AGACGCGCGGATAATTATAGGTGGTATCGTTTTTGTATCCTGCGAATAGGCTTGATGAA    |
| query    | AGACGCGCGGATAATTATAGGTGGTATCGTTTTTGTATCCTGCGAATAGGCTTGATGAA    |
| template | AGTCGAATTGCGCGCGGGCCGGATCATATAATCCCTGCTTTTTTCGCAAAGCTTACTAACG  |
| query    | AGTCGAATTGCGCGCGGGCCGGATCATATAATCCCTGCTTTTTTCGCAAAGCTTACTAACG  |
| template | TTGGTGACGCCATATAATTGCGGTTATCATTGCGGATCGTAATGGCGTAAACGTCCTGAT   |
| query    | TTGGTGACGCCATATAATTGCGGTTATCATTGCGGATCGTAATGGCGTAAACGTCCTGAT   |
| template | TGGCGGAAACGAAATAGCTATCTGCCGGAAGTCGTA CTGCCAGCCATTGATGACCGCTTC  |
| query    | TGGCGGAAACGAAATAGCTATCTGCCGGAAGTCGTA CTGCCAGCCATTGATGACCGCTTC  |
| template | CCGTCTCCAGATACCATATCTCTTTGCTATCAATAAACGCGACGCGAAACCTTCGCCCG    |
| query    | CCGTCTCCAGATACCATATCTCTTTGCTATCAATAAACGCGACGCGAAACCTTCGCCCG    |
| template | CGCCTTTTGTTCATAATATCTCCAGTAATTTGGCGCCCTGACGCGCCGATTGCGCCA      |
| query    | CGCCTTTTGTTCATAATATCTCCAGTAATTTGGCGCCCTGACGCGCCGATTGCGCCA      |
| template | CTGGCAGGATCACGGACTCAATGGCGTCTTCCGTGATTCCCGTTTTTGTACAGTAAGGAT   |
| query    | CTGGCAGGATCACGGACTCAATGGCGTCTTCCGTGATTCCCGTTTTTGTACAGTAAGGAT   |
| template | CGGCAGCCAGCGCCGCTCTGCCGTTATAAATGGTTTCCGTTGCGCTCATTCCGACGCCCG   |
| query    | CGGCAGCCAGCGCCGCTCTGCCGTTATAAATGGTTTCCGTTGCGCTCATTCCGACGCCCG   |

|          |                                                               |
|----------|---------------------------------------------------------------|
| template | CCGAATTGAAACCGGCTTCACCCATGGCGTTATCGTTAGTATCAAAGTCATGAATCGCCG  |
| query    | CCGAATTGAAACCGGCTTCACCCATGGCGTTATCGTTAGTATCAAAGTCATGAATCGCCG  |
| template | TATAGCGCATCGCTGTCTCCGGAAGCGCCAGCTAAAATTGTTCCGATGTGCTTTATACT   |
| query    | TATAGCGCATCGCTGTCTCCGGAAGCGCCAGCTAAAATTGTTCCGATGTGCTTTATACT   |
| template | CGCCTTGTTGATGAAACGCGATGGGATGAATAACCTTATGCTTGGCGTTATTTGCCGAGC  |
| query    | CGCCTTGTTGATGAAACGCGATGGGATGAATAACCTTATGCTTGGCGTTATTTGCCGAGC  |
| template | CATCTTCGTTGCGCGGATAATGAAGGAGCCGTCAGCCGAAGCCTGATTGCCTACCAAAA   |
| query    | CATCTTCGTTGCGCGGATAATGAAGGAGCCGTCAGCCGAAGCCTGATTGCCTACCAAAA   |
| template | GGGTAGTACAGGCGATGACTTTACCCATACCCAGCAGCGTAACGGCGAATGCAAGATACT  |
| query    | GGGTAGTACAGGCGATGACTTTACCCATACCCAGCAGCGTAACGGCGAATGCAAGATACT  |
| template | TTTTCATAAAGGTTCCCACTGAATAACGCATTATGGGATGAATTGACCCTGGATTGGAAA  |
| query    | TTTTCATAAAGGTTCCCACTGAATAACGCATTATGGGATGAATTGACCCTGGATTGGAAA  |
| template | CCGAGAAAGTGATCGAGCCAGCAATATTCTTTGCCGGCATCCTTTATTTTCTCTTTATTG  |
| query    | CCGAGAAAGTGATCGAGCCAGCAATATTCTTTGCCGGCATCCTTTATTTTCTCTTTATTG  |
| template | AGGTTGTATTGATAACCCACAGCCCTGTGGCAGGGAAGGGGAACAGAACCTGTCCTGACCT |
| query    | AGGTTGTATTGATAACCCACAGCCCTGTGGCAGGGAAGGGGAACAGAACCTGTCCTGACCT |
| template | TAGCTATCACCACATCAGGCAGACGAACCGAAAAGATATTATGTTTCATCGGCATAGCGG  |
| query    | TAGCTATCACCACATCAGGCAGACGAACCGAAAAGATATTATGTTTCATCGGCATAGCGG  |
| template | TAAGATGCCGAGCCACCGTGTAATAGAGCAATCGCGTTAACTAACGATAACCCAGGCCG   |
| query    | TAAGATGCCGAGCCACCGTGTAATAGAGCAATCGCGTTAACTAACGATAACCCAGGCCG   |
| template | AAACCGGCAGTGTGGCGGGCATTATCTCCTCGCCAAAAACGCCGAAAAGCTTATCCGCA   |
| query    | AAACCGGCAGTGTGGCGGGCATTATCTCCTCGCCAAAAACGCCGAAAAGCTTATCCGCA   |
| template | TCGGCGGGGTGGCTGCCTGGATTAGCGACCCGAATTTCTGCAACGTTATCATCATAAGCG  |
| query    | TCGGCGGGGTGGCTGCCTGGATTAGCGACCCGAATTTCTGCAACGTTATCATCATAAGCG  |
| template | CTTTCAATACGTATCACGGCGTTTTTCATCAGAATAACGGATGGCATTTCGTAGCAGGTTT |
| query    | CTTTCAATACGTATCACGGCGTTTTTCATCAGAATAACGGATGGCATTTCGTAGCAGGTTT |
| template | GAGAGCACTCTTTGTAATAATATTTTCGTCAGCCCATACCGTTCCCTGACATTGATTTATA |
| query    | GAGAGCACTCTTTGTAATAATATTTTCGTCAGCCCATACCGTTCCCTGACATTGATTTATA |
| template | AAACAGATGCGCTTCTCCTCGGCAAGGGGGCTAAGATAATCCAGCATATTTTCGACCAGC  |
| query    | AAACAGATGCGCTTCTCCTCGGCAAGGGGGCTAAGATAATCCAGCATATTTTCGACCAGC  |
| template | GCATTGAGCGAAACAGGCTGTTTTTTTACCCTATATTCTGGTGCTCCGCGCGTGCCAGA   |
| query    | GCATTGAGCGAAACAGGCTGTTTTTTTACCCTATATTCTGGTGCTCCGCGCGTGCCAGA   |
| template | AAGAGAATATTTTCTGTAGTCGCGACAGTCCCTCCAGCTCTTCAATATTATCGACAAGG   |
| query    | AAGAGAATATTTTCTGTAGTCGCGACAGTCCCTCCAGCTCTTCAATATTATCGACAAGG   |
| template | GCTTGTTGATACTCTTCGGCGCTGCGTTCCCTGACTCAGCATCACCTGATTCTTCCCCAGT |
| query    | GCTTGTTGATACTCTTCGGCGCTGCGTTCCCTGACTCAGCATCACCTGATTCTTCCCCAGT |
| template | AAAAATTAACCGGCGTGCGCAGCTCATGCGCCAGATCGTCGGCAAATTGGTTCAGGCGT   |
| query    | AAAAATTAACCGGCGTGCGCAGCTCATGCGCCAGATCGTCGGCAAATTGGTTCAGGCGT   |
| template | TCAAAATCGTCGGAAGCTTCTGGCGCATGGTATTTAGCGCTTGTCGAAGCGGCTGAGC    |
| query    | TCAAAATCGTCGGAAGCTTCTGGCGCATGGTATTTAGCGCTTGTCGAAGCGGCTGAGC    |
| template | TCAACGGGTAACGCCTGTTCCGCCAACGGCTGGCGAAGTGTCGCGCTATCTGTGCGCGCG  |
| query    | TCAACGGGTAACGCCTGTTCCGCCAACGGCTGGCGAAGTGTCGCGCTATCTGTGCGCGCG  |
| template | GTGAGTCGGCTGAGCGACGTAATGGCCCGCAGCCGTTTCTGATGACTAATGGACTGAGC   |
| query    | GTGAGTCGGCTGAGCGACGTAATGGCCCGCAGCCGTTTCTGATGACTAATGGACTGAGC   |
| template | GCCGAACAGACGAGGATCGCGATAAGGCTCATCAGCAAACGTTGCGGCGATATTGCGCC   |
| query    | GCCGAACAGACGAGGATCGCGATAAGGCTCATCAGCAAACGTTGCGGCGATATTGCGCC   |

|          |                                                               |
|----------|---------------------------------------------------------------|
| template | AGCATTTGCCGCCTTTCCGTCGCCAGCCTGGCAATAGTAAGGGTCAGCGGGTCATCGCCG  |
| query    | AGCATTTGCCGCCTTTCCGTCGCCAGCCTGGCAATAGTAAGGGTCAGCGGGTCATCGCCG  |
| template | CTTCTGGCGCTTACGCGTACCGGGTCAGTTCCGTGCCTTGTACCGCCTGGCGAAATAAG   |
| query    | CTTCTGGCGCTTACGCGTACCGGGTCAGTTCCGTGCCTTGTACCGCCTGGCGAAATAAG   |
| template | GTTTCGCGGGTGATGTTTTAGTCAGCGGAATCTCGTTAAAGCGTTGGTCGGGGATGCCG   |
| query    | GTTTCGCGGGTGATGTTTTAGTCAGCGGAATCTCGTTAAAGCGTTGGTCGGGGATGCCG   |
| template | CTATGATTAATCGCAACATTGTGGCTGTTGCTGAATGGATCAATAAGATGTCCTGCTTC   |
| query    | CTATGATTAATCGCAACATTGTGGCTGTTGCTGAATGGATCAATAAGATGTCCTGCTTC   |
| template | GTATCCACCATCCGATTGAAATAGAGCGGCAGATTTCCGGCCTGGCGCCATCCAGTAAC   |
| query    | GTATCCACCATCCGATTGAAATAGAGCGGCAGATTTCCGGCCTGGCGCCATCCAGTAAC   |
| template | AGTTGCTGCATTTGCGCCGCCGATTTATTAGCGTCATATCATCCCGATACGTTAATTCT   |
| query    | AGTTGCTGCATTTGCGCCGCCGATTTATTAGCGTCATATCATCCCGATACGTTAATTCT   |
| template | TTGCTCAGCGCGTTATAGAGCGTCCAGCTAATGCCGGTACAGGCGAGGATAAGGATGGCG  |
| query    | TTGCTCAGCGCGTTATAGAGCGTCCAGCTAATGCCGGTACAGGCGAGGATAAGGATGGCG  |
| template | ATAAAAGAAATTGTGAGCGCAGCGTCATTGATAACTTAACCATCTGCGACGTTTCCGC    |
| query    | ATAAAAGAAATTGTGAGCGCAGCGTCATTGATAACTTAACCATCTGCGACGTTTCCGC    |
| template | CTGTAATCGATAACCCATCCCCGGACGGTCATAATGAGCTTCTTTCAAATGGATCGTC    |
| query    | CTGTAATCGATAACCCATCCCCGGACGGTCATAATGAGCTTCTTTCAAATGGATCGTC    |
| template | TACTTTGGCGCGCAGCCGACGAATCGCGACATCAACGGTGTTGGTTTCACTATCAAAGTT  |
| query    | TACTTTGGCGCGCAGCCGACGAATCGCGACATCAACGGTGTTGGTTTCACTATCAAAGTT  |
| template | AATTCCCAAACCTTCGCTGGCGATCGCGTTTCGGGGCACGATTTCTCCTGCCCGGGACGC  |
| query    | AATTCCCAAACCTTCGCTGGCGATCGCGTTTCGGGGCACGATTTCTCCTGCCCGGGACGC  |
| template | CAGTAACCAGAGGAGCAGGAATTCTTTGCGGGTCAGGGAATCGGTTTGCCATTTCTGTA   |
| query    | CAGTAACCAGAGGAGCAGGAATTCTTTGCGGGTCAGGGAATCGGTTTGCCATTTCTGTA   |
| template | CACTGATTGCTTTGTGGCATCCATGTCCAGACCATTGATCGTCAGTCGAGTAAAGGCAGG  |
| query    | CACTGATTGCTTTGTGGCATCCATGTCCAGACCATTGATCGTCAGTCGAGTAAAGGCAGG  |
| template | GACATGCTGTCTGAGTTGAGCTCTCACCCGGGCCAGCAGTTTCGGCGAAGGAAAAAGGCTT |
| query    | GACATGCTGTCTGAGTTGAGCTCTCACCCGGGCCAGCAGTTTCGGCGAAGGAAAAAGGCTT |
| template | AACAAGGTAATCATTAGCGCCCGCCTCAAGACCTTTGACGCGATCCTCAACCGAGTCGCG  |
| query    | AACAAGGTAATCATTAGCGCCCGCCTCAAGACCTTTGACGCGATCCTCAACCGAGTCGCG  |
| template | CGCCGTCAAGCAAATAACAGGGGACTGATGCGCAGTGCCTAACGCGCGTAAACCTGCCA   |
| query    | CGCCGTCAAGCAAATAACAGGGGACTGATGCGCAGTGCCTAACGCGCGTAAACCTGCCA   |
| template | TCCATCAAGCCCCGGCAGCATAATATCAAGAATAATCAATGAATAATGTTCTGAAGGGC   |
| query    | TCCATCAAGCCCCGGCAGCATAATATCAAGAATAATCAATGAATAATGTTCTGAAGGGC   |
| template | CAGGTGTAATCCGTCTCGTCCATCACAGGCATAATCAACCACATAGCCTGCTTCGTGAG   |
| query    | CAGGTGTAATCCGTCTCGTCCATCACAGGCATAATCAACCACATAGCCTGCTTCGTGAG   |
| template | TCCCTGACGTACCCACTCAATGGTTTTCTGGTTATCTTCAATCAATAAAATCTTCATCAA  |
| query    | TCCCTGACGTACCCACTCAATGGTTTTCTGGTTATCTTCAATCAATAAAATCTTCATCAA  |
| template | CGCAGTATGCCATAGGCTTGTTAGCGAATCCGTAAATCTCCAACAAGATGACATAATTGT  |
| query    | CGCAGTATGCCATAGGCTTGTTAGCGAATCCGTAAATCTCCAACAAGATGACATAATTGT  |
| template | CATGTCCGT                                                     |
| query    | CATGTCCGT                                                     |

# **SPI-9\_NC\_003198**

|          |                                                              |
|----------|--------------------------------------------------------------|
| template | ATGCGTCTACTCGCCGTGGTTTCGAAATTGACTGGCGTCTCCACCACTGTGGAATCCTCA |
| query    | GCGGACGGAAAAACGGTAAGCGGGCAAGCCGAAGCGGGCAGTACCATTACCATCAAAGAT |

|                |                                                                                                                           |
|----------------|---------------------------------------------------------------------------------------------------------------------------|
| template query | GCGGTCACTCTTAACGCGCCTTCAATTGTTAAATTATCAGTGGCCGGGATGAAATTCAGTCCCTCAGGCAACGTCGTTGGCGAGGGCAAAGCGGATAGCGACGGTAAATTTAGTATTGAT  |
| template query | CAACTTACGCGCATTAAATCAGGATCTGGTGGTGAGGCTCCATTCCGGCGAAACGATCACGCTGACAGCGCCACAGATTAGCGGCGAACAACCTACCGTGACCGCGACTGACGATGCCGGC |
| template query | ATTAAAACTTTACGTTACCAACGATCTGGGCGCAAGCCAGCTGGTACTGGCGGAAACAAATACCGGCCATCGGCAACCATTGATGCGCCCAACATTCTCTCCCCGATACACCGGTT      |
| template query | GATGGCACGTTATGGTGGGTGAAAATCCGCAAGCCGGGCTACATTTTGAACAAATCGCTATCACCGCCGCTATCGATGATGCCGCTCCCCCTACCGGCACGCTGAGCAATAATCAGTTT   |
| template query | GATATTAATGAGCTGCTGGTCACCTCCGGCGCTTCCCATGAAGCAGGCGGCGCGTTTGGACGAACGACAATACCCCACTCTGGAGGGCACCGGCAGCGCAGGCACAGTCATCCATATT    |
| template query | CCGTGGGTACTGGCTGGCGCGGTGGCGGCTGGCGGCATTGCCGCTATCGCGTCTTCCGGCTACGCCAATGGTCAGGAAATAGGCTCAACAACGGTTGATACCAGCGGAAACTGGCATTIT  |
| template query | GGCGGCGATTCCCACCATCATTTCGGATGGCGATAATCCGCCCCCCGATAACACCAATCCTGCCATTACCAGCGCGCTAGCGGATGGGGAAAATCATTTCACCGCCATTGCGACTAACGTG |
| template query | GACGGTAATCCCCCTGATAACAGCAATCCGGCGGCAGTAACCTTAACGGCAATACTCCAAGAGCGAAAGTAGCGAATCAGCCCGCTTTACGCTGACTATCGACACACTCATCCCCGAT    |
| template query | GGTAGCAGTAATCCTGTAGATACTACCCCGCCTCTCGCTCCCGGCGAATTATTGATTTCAGCCCCACGTGTTGAACTGATTGCCGATAACACCAAGTTTGCTCACCGGGCCGCTACAGAAT |
| template query | GCGGACGGAAAAACGGTGAGCGGCGAGGCCGAAGCGGGCAGTCTCATTACCATCAAAGATAATGACCGAACTGACGAGGCAAAACCGCTATTTTCCGGGCAGGGAGACGCAGGCAATACC  |
| template query | CCCTCAGGCAACGTCGTTGGCGAGGGCAAAGCGGATAGCGACGGTAAATTTAGTATTGATATCACGATTAAGAAGGTTCAACCGTTATCGGCAGCGCTACCGTAGACGAAAATGGACGC   |
| template query | CTGACAGCGCCACAGATTAGCGGCGAACAACCTACCGTGACTGCGACTGACGATGCCGGCTGGACCTTTACGCCGACTACGCCGTTAAGCGATGGCGAACATACCTTTACCGTCGAACAA  |
| template query | AATACCGGCCCATCCGCAACCATTGATGCGCCCAACATTCTCTCCCCGATACACCGGTTAGCGACAAGCCGGAAAAACAGAGCCGCGTGACGACAACGCCCTACTATCATTGTGGACACC  |
| template query | ATCACCGCCGCTATCGATGATGCCGCTCCCCCTACCGGCACGCTGAGCAATAATCAGTTTACGCCGCTGACGCCGCTATCATTGATAATGTTGCGAAAGACGGCACAACCGTTAGCGGC   |
| template query | ACGAACGACAATACCCCACTCTGGAGGGCACCGGCAGCGCAGGCACAGTCATCCATATTACCGCTGAAGCTGGCAGTACTGTGTCGATCTATGACCCGGCGGGAAATTACCTGGGCTCC   |
| template query | TACGCCAATGGTCAGGAAATAGGCTCAACAACAGTTGATACCAGCGGAAACTGGCATTITACGATTACCGGAGAAAAATAACCACTTCAGCATCACGCTGAATCCGGCTCAGACCCACGGC |
| template query | GCCATTACCAGCGCGCTAGCGGATGGGGAAAATCATTTACCGCCATTGCGACTAACGTTGAGCGTCTGGAAGCGCGTATTACGACGCCGTCGTTAACATCGGCCCGCCACGGAGTTT     |
| template query | AAAGGCGAAAGTAGCGAATCAGCCCGCTTTACGCTGACTATCGACACACTCAGCCCCGATACCGCTTCTGACTCACAGTATCCTGCCAGCCGACTATCCTTACCGTGACGGATGACGCT   |
| template query | GCTCCACGCGTTGAACTGATGGCCGATAACACCGGTTTGCTCACCGGACCGCTACAGAATGGCGCCGTTACCGGCTGCTGAAAAATGGCGATGCCACAGATGATAACCGCCAACCTC     |
| template query | AATGACCGGACTGACGAGGCAAAACCGCTATTTTCCGGGCAGGGAGAGGCAGGCAATACCAGCGTACTGCTGAACCAAGGCAGTACGATATCGATTAAACGATAATGGCTTTCTGTAGCG  |
| template query | ATCACGATTAAGAGGGTTCAACCGTTATCGGCAGCGCTACCGTAGACGAAAATGGACGCACCTTCCGCCCATGTGCTGCTGACGCTGACGGCAAAATGGAGCTTTACCCCTCGCTGGCG   |
| template query | TGGACCTTTACGCCGACTACGCCGTTAAGCGATGGCGAACATACCTTTACCGTCGAACAGCTTGCCGATGGCGACCATGTCTTTACCGCTACCGGCACCAACGATCGCGGCACCAAGCGGC |
| template query | AGCGACAAAGCCGGAAACGAAGCCGCGTGACGACAACGCCCTACTATCATTGTGGACACCAGTCCGTCTCCTTTACCATTGATATCGACACGACGCCGCGGTGCTGGAAGGCCTGGCG    |
| template       | ACGCCCGCGGACGCCGCTATCATTGATAATGTCGCGAAAGACGGCACAACCGTTAGCGGC                                                              |

|          |                                                               |
|----------|---------------------------------------------------------------|
| query    | GTTAGCGACGTCGGCGACAGACTCACCGGCACTACGGAAGCTGGCAGTACTGTGGTTATC  |
| template | ACCGCTGAAGCTGGCAGTACCGTGTCTGATCTATGACCCGGCGGAAATTACCTGGGCTCC  |
| query    | AAAGACAGCCTGGGAAATACGCTCGGGAGTGGAACGGCAGGCAGCAGCGGTACCTTCTCA  |
| template | ACGATTACCGGAGAAAATAACCACTTCAGCATCACGCTGAATCCGGCCAGACCCACGGC   |
| query    | ATAGGTATTAGCCCGCGAAAATTAAACGGCGAAACATTAAAGCATTAGCGTTACCGATAAA |
| template | GAGCGTCTGGAAGCGCGTATTCAAGACGCCGTCGGTAACATCGGCCCCGCCACAGAGTTT  |
| query    | GCCGCGAATAGCGGTCCGGTAGAAACGCTGAACGCGCCGGATAAACTGCGCTGCGGCA    |
| template | ACCGCTTCTGACTCACAGTATCCTGCCAGCCGACTATCCTTACCGTGACGGATGACGCT   |
| query    | CCGGACGGTCTTACCGTGGCGACCGACGGTCTGTCCGTAAGCGGTACGGCGGAAGCCGGG  |
| template | GGCGCCGTTACCGGCTGTTGAAAAATGGCGATGCCACAGATGATAACCGCCAACCCCTC   |
| query    | GCAACGGTCACATATCCGCGACAGTAGCAACACCGTACTTGGCAGCGCCGTGCTAATGGC  |
| template | AGCGGTACTGCTGAACCAGGCAGTACGATATCGATTAAAGATAATGGCTTTCTGTTCCG   |
| query    | AACGGACAATTATCGTTCGCTGAATACGGCGCAGACTAACGGCCAGGCACCTATCGCT    |
| template | AGCTTTCCGCCCATTTGCTGCTGACGCTGACGGCAAAATGGAGCTTTACCCCTCGCTGGCG |
| query    | ACCGCCACCGATGTCGCGAAAAACGAAAGCGCCGCGCGACGGTTATCGCGCCGACAGT    |
| template | CTTGCCGATGGCGACCATGTCTTTACCGCTACCGCGACCAACGATCGCGGCACTAGCGGG  |
| query    | ACCGCGCCGAAATGCCGAAAAACGTGGTAATTAGTGAGGATGGCACCAGTATCAGCGGC   |
| template | CAGTCCGTCGCCTTTACCATTGATATCGACACGCAGCCGCCGGTGCTGGAAGGCCTGGCA  |
| query    | ACCGCCGAACCGGGTAGCGCCATCACGATCGCCACGCCGGACGGCAAGCCGCTTGGCAGC  |
| template | GTTAGCGACGTCGGCGACAGACTCACCGGCACTACGGAAGCTGGCAGCACTGTGGTTATC  |
| query    | GGCAAAGCAGATGGCGAAGGTCATTTTACCCTTCCCCTCGTCCCCGCACAGACCAACGGC  |
| template | AAAGATAGCCTGGGAAATACGCTCGGGAGTGGAACGGCAGGCAGCAGCGGCACCTTCTCA  |
| query    | GAACAGGTTACCGTCACCGCCACCGACAGCGCCAACAACGTACGCCGCCAACCACAGCG   |
| template | ATAGGTATTAGCCCGCGAAAATTAAACGGTAAACATTAAAGCATTAGCGTTACCGATAAA  |
| query    | CAAGCGCCCGATATCACCGCCCCGGATAAGCCCATTTACTCAGGTACTGGACGATGTT    |
| template | GCCGCGAATAGCGGTCCGGTAGAAACGCTGAACGCGCCGGATAAACTGCGCTGCGGCA    |
| query    | GAAAGCTTCACCGGGCCGCTGGTTAACGGACAACCAACGACAACCGTCCCACCCTT      |
| template | CCGAACGGTCTTATCGTGGCGACCGACGGTCTGTCCGTAAGCGGTACGGCGGAAGCCGGG  |
| query    | AGCGGTACGGCGGAGGCCGGCGCGGTGTGAAAGTCTTTGATAACGGCTTTTCACTGGGA   |
| template | GCAACGGTCACATATCCGCGACAGTAGCAATACCGTACTTGGCAGCGCCGTGCTAACGGC  |
| query    | CTCGCCACGCTACAGCCCAACGGTGCTGGACGTTTACGCCGTGCAAAATTTAGTGAA     |
| template | AACGGACAATTATCGTTCGCTGAATGCGGCGCAGACTAACGGCCAGGCGCTTATCGCT    |
| query    | GGCGCGCATCGACTGACCGTAATCGCAACCGACGCTAAAGGCAATGCCAGTCAGGCCGG   |
| template | ACCGCCACCGATATAGCGAACAACGAAAGCGCCGCGCGACGGTCGACGCGCCGGACAGT   |
| query    | TCATTGACCTGGTGGTCGATACGCAATCGCCGACGAACCGGTAATCACCTTCATTACA    |
| template | ACCGCGCCAGAAATGCCGAAAAACGTGGTAATTAGTGAGGATGGCGCCAGTATCAGCGGC  |
| query    | GATGATGCGCCGGGTATTCTCGGTAGCGTCGCGCATCTGGGGCTCACTAACGACAGCACG  |
| template | ACCGCCGAACCGGGTAGTCCATTACGATCACACGCCGGACGGCACGCCGCTCGGCAGC    |
| query    | CCAACGATTAATGGTACAGGTGAACCGGGTTCCACAGTACACCTGTATCAGAAATGGCGCC |
| template | GGCAAAGCAGATGGCGAAGGTCATTTTACCCTTCCCCTCGCCCCGCACAGACCAACGGC   |
| query    | CGGATAGCAGATATTATCGTCGGTAATTCGGCGCTGAGAGCTACGCTTACACCACGGCC   |
| template | GAACAGGTTACCGTCACCGCCACCGACAGCGCCAACAACGTACGCCGCCAACTACAGCG   |
| query    | TCGCCACTGGCGGACGACACCTACACCTTTACCGTGACGGCCAGCGACAGTAACGGCAAC  |
| template | CAAGCGCCGATATCACCGCCCCGGATAAGCCCATTTATCACCAGGTGCTGGACGATGTT   |
| query    | ACCACGCCTTTTCGACCGATTTTACGATTACCATTGATACCCAGGCCCTGCGCCCCC     |
| template | GAAAGCTTCACCGGGCCGCTGGTTAACGGACAACCAACCAATGACAACCGCCCCACCCTT  |
| query    | GGCGTTATCGGCGTAGCTGACGGCGACGGAATACGATTGATACCAATCAGATTACCCAG   |

|          |                                                                |
|----------|----------------------------------------------------------------|
| template | AGCGGTACGGCGGAGGGCTGGCGCGCGTGTGCGAAATTTTGTATAACGGCGTTTCGCTGGGG |
| query    | GAATCCCAGCCCCGGTTGAGCGGTAGCGGCACCGAGGCGACACAATCATCTTTACGAT     |
| template | CTCGCCACGCTACAGCCCAACGGCGGCTGGACGTTTACGCCGTCGCAAAATTTAGGTGAA   |
| query    | AATGGCAATGCCATAGGTGAGCGCTGGTCGGCACGGACGGGCGCTGGCAGTTTACGCCG    |
| template | GGCGCGCATCGACTGACCGTAATCGCAACCGACGCTAAGGCAATGCCAGTCCGGCGGGG    |
| query    | CCTGCCGCGCTGGGCGACGGCGACCACTTCTGACCGCTCGCGCCAACGATCCGGCGGGG    |
| template | AACGAAAGTCCGGAATCCATCAGCTTTACCTTACGCATCGATACCCAGGCGCGGATGCG    |
| query    | AACGAAAGTCCGGAATCCATCAGCTTTACCTTACGCATCGATACCCAGGCGCGGATGCG    |
| template | CCGCAGATCGTGTAGCCGCCATCACAGGCGGAGAAGGCGAGGTGCTACTGGCAACGGC     |
| query    | CCGCAGATCGTGTAGCCGCCATCACAGGCGGAGAAGGCGAGGTGCTACTGGCAACGGC     |
| template | AGTATTACCAATCAGCGTATGCCGACCCTCAGCGGCACCGCGAACCCGGCGCCATCATC    |
| query    | AGTATTACCAATCAGCGTATGCCGACCCTCAGCGGCACCGCGAACCCGGCGCCATCATC    |
| template | ACCTGTACAATAACGGCGTAGAACTGGCTACCGTCCAGGTCAATCCACAGGGTAGCTGG    |
| query    | ACCTGTACAATAACGGCGTAGAACTGGCTACCGTCCAGGTCAATCCACAGGGTAGCTGG    |
| template | ACCTATCCGCTAACCCGTAATCTGAGCGAAGGGTTAAACATCCTGACGGCCACCGCCACG   |
| query    | ACCTATCCGCTAACCCGTAATCTGAGCGAAGGGTTAAACATCCTGACGGCCACCGCCACG   |
| template | GATGCCGCGAGGCAATAGTAGCCCGACCTCCGGCGTTTTCTCCGTTACCTTGATACCCAG   |
| query    | GATGCCGCGAGGCAATAGTAGCCCGACCTCCGGCGTTTTCTCCGTTACCTTGATACCCAG   |
| template | CCTCCAGCGCAGCCTGACGCGCCGCTAATCAGCGATAACGTGCGGCCGTTATCGGCAAC    |
| query    | CCTCCAGCGCAGCCTGACGCGCCGCTAATCAGCGATAACGTGCGGCCGTTATCGGCAAC    |
| template | ATCGGCAATAATGGCGCAACGAACGATACCACGCCGACCTTCAGCGGCACGGGAGAGATC   |
| query    | ATCGGCAATAATGGCGCAACGAACGATACCACGCCGACCTTCAGCGGCACGGGAGAGATC   |
| template | GGCAGCACGATAATTCTCTACAATAATGGCAGTGAAATTGGTCGCACAACGGTAGGCGAT   |
| query    | GGCAGCACGATAATTCTCTACAATAATGGCAGTGAAATTGGTCGCACAACGGTAGGCGAT   |
| template | AACGGTAGCTGGAACTTTACGCCTGCGGCACGTACGCCAGAAACCTATACCATTACCGTC   |
| query    | AACGGTAGCTGGAACTTTACGCCTGCGGCACGTACGCCAGAAACCTATACCATTACCGTC   |
| template | ACGGAAACCGATATAGCGGGCAATATCAGTCCACCTTCCGCCTCAGTCACTTTTACGCTA   |
| query    | ACGGAAACCGATATAGCGGGCAATATCAGTCCACCTTCCGCCTCAGTCACTTTTACGCTA   |
| template | GACACCACTGCGCCCGCCAATCCGGTTATCACTTTTGCCGAAGATAACGTGCGCGAAGTC   |
| query    | GACACCACTGCGCCCGCCAATCCGGTTATCACTTTTGCCGAAGATAACGTGCGCGAAGTC   |
| template | CAGGATACTATTGTGACGGGCGCAACCACTGACGACAATACACCGGTCAATTCACGGCACT  |
| query    | CAGGATACTATTGTGACGGGCGCAACCACTGACGACAATACACCGGTCAATTCACGGCACT  |
| template | GGCGACATCGGCAGCGTATACGCTCTATAATGGCAGTAGTGTGTTGGGCGTAGTCACC     |
| query    | GGCGACATCGGCAGCGTATACGCTCTATAATGGCAGTAGTGTGTTGGGCGTAGTCACC     |
| template | GTCGATGAGACCGGTACCTGGACGCTGCCGGTGACCAGCGCGTTGCCGGATGGCGTCTAC   |
| query    | GTCGATGAGACCGGTACCTGGACGCTGCCGGTGACCAGCGCGTTGCCGGATGGCGTCTAC   |
| template | ACCCTGACCGCCATTGCCGCCGATGCCGCCGAAACAGCAGCGGCGTATCGAACAGCTTT    |
| query    | ACCCTGACCGCCATTGCCGCCGATGCCGCCGAAACAGCAGCGGCGTATCGAACAGCTTT    |
| template | ACCTTCACCGTCGACACCGTTCCGTTGCAGCCGCCGTCGTCAATGATCCTCGACGAT      |
| query    | ACCTTCACCGTCGACACCGTTCCGTTGCAGCCGCCGTCGTCAATGATCCTCGACGAT      |
| template | GTTGCACCAAGTGACCGGGCCATTAAACGATGGCGCCTTTACTAACGATCGGACGCTGACT  |
| query    | GTTGCACCAAGTGACCGGGCCATTAAACGATGGCGCCTTTACTAACGATCGGACGCTGACT  |
| template | ATTAACGGCAGCGGCGAAACGGCAGCACCGTCACGATTTACGACAATGGCGTGGAATC     |
| query    | ATTAACGGCAGCGGCGAAACGGCAGCACCGTCACGATTTACGACAATGGCGTGGAATC     |
| template | GGGACGGCGCTCGTTACCGACGGGGTCTGGACATTCAATACGCCGAATTGTCAGAAGCC    |
| query    | GGGACGGCGCTCGTTACCGACGGGGTCTGGACATTCAATACGCCGAATTGTCAGAAGCC    |



|          |                                                              |
|----------|--------------------------------------------------------------|
| template | AGCCATGCGCTAACCTTCAGCGCGACTGACGATGCTGGAAATACCACGGCGCAAACCCAG |
| query    | AGCCATGCGCTAACCTTCAGCGCGACTGACGATGCTGGAAATACCACGGCGCAAACCCAG |
| template | CCGATCACATTACCCTGGATATCACCGCCCCGCCGCGCCAACGATCCAGACGGTGGCC   |
| query    | CCGATCACATTACCCTGGATATCACCGCCCCGCCGCGCCAACAGTCCAGACGGTGGAT   |
| template | GATGATGGCACGCGCTCGCCGGAATTGCCGATCCTTACGCTACCGTTGAAATTCATCAT  |
| query    | GACGATGGCACGCGCTCGCCGGAATTGCCGACCTTACGCTACCGTTGAAATTCATCAT   |
| template | GCCGATGGCACCTGGTCGGCAGCGCTGTCGCTAATGGCACCGGTGAATTGTCTGTACG   |
| query    | ATCGATGGCACCTGGTCGGCAGCGCTGTCGCTAATGGCACCGGTGAATTGTCTGTACG   |
| template | CTCAGTCCGGCGCAAACCGATGGCGGTACGCTGACGGCAATTGCTATCGATCGCGCGGG  |
| query    | CTCAGTCCGGCGCAAACCGATGGCGGTACGCTGACGGCAATTGCTATCGATCGCGCGGG  |
| template | AATAACGGCCCCGGCTACGAATTTTCCCTGCTTCCGACAGCGGTCTGCCCGCCGTCCC   |
| query    | AATAACGGCCCCGGCTACGAATTTTCCCGCTTCCGACAGCGGTCTGCCCGCCGTCCC    |
| template | ATCACGGCGATTGAAGATGATGTCGGGAGCATACAGGGGAATATTGCGCGGGCGCGCC   |
| query    | ATCACGGCGATTGAAGATGATGTCGGGAGCGTACAGGGGAATATTGCGCGGGCGCGCC   |
| template | ACGGACGACACCATGCCGACGCTGCGCGGCACCACGGATATCGGCTCTACCGTTGAAGTT |
| query    | ACGGACGACACCATGCCGACGCTGCGCGGCACCACGGATATCGGCTCTACCGTTGAAGTT |
| template | TTCATTGATGGCGATTTCGGCAGGCTTTGCCACCGTTGACGCCAGCGGGAACGGATCTTT |
| query    | TTCATTGATGGCGATTTCGGCAGGCTTTGCCACCGTTGACGCCAGCGGGAACGGATCTTT |
| template | GAGATCGCGACGCCATTAAGCGAAAGCACACATTACTTCACCGTCCAGGCAACCAATGCG |
| query    | GAGATCGCGACGCCATTAAGCGAAAGCACACATTACTTCACCGTCCAGGCAACCAATGCG |
| template | AATGGCCCCGGCGGCTGTCCGACCGGTGCGGATCACTGTCGATCTTAGCGCGCCGGCA   |
| query    | AATGGCCCCGGCGGCTGTCCGACCGGTGCGGATCACTGTCGATCTTAGCGCGCCGGCG   |
| template | CAACCGGTTATTACGCGCAACGGATGATGTCCCGCATGACCGGTACGCTGGATAAC     |
| query    | CAACCGGTTATTACGCGCAACGGATGATGTCCCGCATGACCGGTACGCTGGATAAC     |
| template | GGCGCGCTCACCAATGATTACGCCCCGACGCTCAACGGAACGGGAGAAGCAGGCGCCACA |
| query    | GGCGCGCTCACCAATGATTACGCCCCGACGCTCAACGGAACGGGAGAAGCTGGCGCCACG |
| template | ATCCGCATTCTGGATAACGGCGTAGAAATCGGTTCCGCTACGGTAGATCAAAGCGGCAAC |
| query    | ATCCGCATTCTGGATAACGGCGTAGAAATCGGTTCCGCTACGGTAGATCAAAGCGGCAAC |
| template | TGGCGCTTCACCCGAACACGCCGCTGGAGAGCAACGCACACATCTTTACGCCGTGGCG   |
| query    | TGGCGCTTCACCCGAACCGGCCGCTGGAGAGCAACGCACACATCTTTACGCCGTAGCG   |
| template | ACCGATCCCGCCGGCAATAGCGGTCAGCTTTCGGATTGGTTTACGCTGAACATTGACGCG |
| query    | ACCGATCCCGCCGGCAATAGCGGCCAGCTTTCGGACGGCTTACGCTGAACATTGACGCG  |
| template | CAGGCAACGATGTGCCGTTATCACCTCCGTGATTGACGATAACAATCAACCGACCGTC   |
| query    | CAGGCAACGATGTGCCGTTATCACCTCCGTGATTGACGATAACAATCAACCGACCGTT   |
| template | CCGGTGTTACCGGGCAATCCACCGACGATCGGCAGCCAATACTGAACGGAACGGCGAA   |
| query    | CCGGTGTTACCGGGCAATCCACCGACGATCGGCAGCCAATACTGAACGGAACGGCGAA   |
| template | CCTGGCGCGACAATCACCATTTTGTATAACGGTACGCCGCTTGGCACGGCTCAGGTAGGC |
| query    | CCTGGCGCGACAATCACCATTTTGTATAACGGTACGCCGCTTGGCACGGCTCAGGTAGGC |
| template | GAAAAAGGTAGCTGGACCTTCCCGGTGCCCCGCAATTTGTGAGAGGGAAGCCATAATCTG |
| query    | GAAAAAGGTAGCTGGACCTTCCCGGTGCCCCGCAATTTGTGAGAGGGAAGCCATAATCTG |
| template | ACGGTTAGCGCTACCGATCCGGCGGGCAATACCAGCGCGGTCTCCGCGCCGTGGACGATC |
| query    | ACGGTTAGCGCTACCGATCCGGCGGGCAATACCAGCGCGGTCTCCGCGCCGTGGACGATC |
| template | GTGGTCGATATTACGCTCCGGCGATCCCGGTTCTCACTCCGTTGTGGATGACCAGCCC   |
| query    | GTGGTCGATATTACGCTCCGGCGATCCCGGTTCTCACTCCGTTGTGGATGACCAGCCC   |
| template | GGTATTACCGGCAACCTGGTTAGCGGGCAGTAACGAACGATGCGACGCCACCCTGAAC   |
| query    | GGTATTACCGGCAACCTGGTTAGCGGGCAGTAACGAACGATGCGACGCCACCCTGAAC   |
| template | GGGCGCGGAGAGGCAGGCGCGACGATTAATGTCTATCTTGACGGTAATCCCGCGTCCATC |

|          |                                                              |
|----------|--------------------------------------------------------------|
| query    | GGGCGCGGAGAGGCGAGGCGGACGATTAAATGTCTATCTTGACGGTAATCCGCGTCCAT  |
| template | GGTACCACGACGGTGAATAGCGACGGCACGTGGAGTTTCACGCCGACAGCGCGTTGCA   |
| query    | GGTACCACGACGGTGAATAGCGACGGCACGTGGAGTTTCACGCCGACAGCGCGTTGCA   |
| template | AACGGTAGCCACACGTTACCCCTTAGCGCCACCGATCCGGCGGGTAATAGCAGCGCGGTG |
| query    | AACGGTAGCCACACGTTACCCCTTAGCGCCACCGATCCGGCGGGTAATAGCAGCGCGGTG |
| template | TCCAGCGGATTTGTGCTGACGATTGACACACACCGCCCGCCGCGCGTTATCGCCAGC    |
| query    | TCCAGCGGATTTGTGCTGACGATTGACACACACCGCCCGCCGCGCGTTATCGCCAGC    |
| template | GTGGCAGATAATACGGCGCCGGTAACGGGCATCGTCCCCAACGGCGGCTCGACGAACGAA |
| query    | GTGGCAGATAATACGGCGCCGGTAACGGGCATCGTCCCCAACGGCGGCTCGACGAACGAA |
| template | ACCCGACCAACACTCTCGGGTACCGGTGAGGCGGGTACAACCATCTCGATTATAATGGC  |
| query    | ACCCGACCAACACTCTCGGGTACCGGTGAGGCGGGTACAACCATCTCGATTATAATGGC  |
| template | AGCGCGCTGGTCGGCACGGCGCAAGTTCAGGCCAACGGTAGCTGGAGCTTTACACCGTCT |
| query    | AGCGCGCTGGTCGGCACGGCGCAAGTTCAGGCCAACGGTAGCTGGAGCTTTACACCGTCT |
| template | ACCTCGCTGGGCGCGGGCGTCTGGAACCTGACGGCGACAGCAACCGATGCGGCAGGCAAT |
| query    | ACCTCGCTGGGCGCGGGCGTCTGGAACCTGACGGCGACAGCAACCGATGCGGCAGGCAAT |
| template | ACCAGCGCCGCGTCCGAAATACGCTCGTTACTATTGATACCACGGCTCCCGCCGCGCCT  |
| query    | ACCAGCGCCGCGTCCGAAATACGCTCGTTACTATTGATACCACGGCTCCCGCCGCGCCT  |
| template | GTTATTGATACGGTCTACGACGGTACGGGCCCCATTACCGGCAATCTGAGTTCAGGGCAG |
| query    | GTTATTGATACGGTCTACGACGGTACGGGCCCCATTACCGGCAATCTGAGTTCAGGGCAG |
| template | ATCACAGACGAGGCGCGCCCTGTCATTAGCGGCACCCGTGAAGCCAACACAACATTTCGT |
| query    | ATCACAGACGAGGCGCGCCCTGTCATTAGCGGCACCCGTGAAGCCAACACAACATTTCGT |
| template | CTCTACGATAACGGCACGCTGCTGGCTGAAATTCGCCGACAAATAGCAGTAGCTGGCGC  |
| query    | CTCTACGATAACGGCACGCTGCTGGCTGAAATTCGCCGACAAATAGCAGTAGCTGGCGC  |
| template | TACACGCCCGACGCCTCGCTGGCGACGGGCAACCATGTAATTACCGTCATTGCCGTTGAT |
| query    | TACACGCCCGACGCCTCGCTGGCGACGGGCAACCATGTAATTACCGTCATTGCCGTTGAT |
| template | GCCGCAGGCAACGCCAGCCCCGTTTCGGACAGCGTTAATTTCTGTCGTGATACACGCCG  |
| query    | GCCGCAGGCAACGCCAGCCCCGTTTCGGACAGCGTTAATTTCTGTCGTGATACACGCCG  |
| template | CCGCTGACGCCGGTAATCACATCAGTCAGTGACGATCAGGCGCCAGGCCTCGGCACGATC |
| query    | CCGCTGACGCCGGTAATCACATCAGTCAGTGACGATCAGGCGCCAGGCCTCGGCACGATC |
| template | GCGAACGGGCAAAATACCAACGATCCTACGCCAACCTTCAGCGGCACCGCAGAAGCCGGC |
| query    | GCGAACGGGCAAAATACCAACGATCCTACGCCAACCTTCAGCGGCACCGCAGAAGCCGGC |
| template | GCCACGATCACGCTCTATGAAAATGGTACGGTCATTGGCACGACAACGGCTCAGCCTGAC |
| query    | GCCACGATCACGCTCTATGAAAATGGTACGGTCATTGGCACGACAACGGCTCAGCCTGAC |
| template | GGCGCGTGGAGCGTCTCCACCTCAACGTTGGCAAGCGGAACGCACGTATCACCGCCGTC  |
| query    | GGCGCGTGGAGCGTCTCCACCTCAACGTTGGCAAGCGGAACGCACGTATCACCGCCGTC  |
| template | GCCACCGATGCCGCAGGAAACAGCAGCCCGAACAGTACGGCTTTCACCTGACGGTCGAT  |
| query    | GCCACCGATGCCGCAGGAAACAGCAGCCCGAACAGTACGGCTTTCACCTGACGGTCGAT  |
| template | ACCACCGCGCCGCAACGCCAATCCTGACGTCCGTGGTGGATGACGTGCGGGCGGGGTC   |
| query    | ACCACCGCGCCGCAACGCCAATCCTGACGTCCGTGGTGGATGACGTGCGGGCGGGGTC   |
| template | ACAGGAAATCTCGCTAATGGTCAGATAACCAATGATAACCGCCCCACGCTGAACGGCACT |
| query    | ACAGGAAATCTCGCTAATGGTCAGATAACCAATGATAACCGCCCCACGCTGAACGGCACT |
| template | GCCGAAGCGGGCAGCGTGGTCAGTATCTATGATGGCGACACTCTGCTTGGCGTCACCTCG |
| query    | GCCGAAGCGGGCAGCGTGGTCAGTATCTATGATGGCGACACTCTGCTTGGCGTCACCTCG |
| template | GCTAACGCTAGCGGCGCTGGAGCTTCACGCCGACGACAGGGTTAAACGACGGCACGCGC  |
| query    | GCTAACGCTAGCGGCGCTGGAGCTTCACGCCGACGACAGGGTTAAACGACGGCACGCGC  |
| template | ACATTAACAGTGACCGCCACCGACCCAGCAGGCAACGTTAGCCCGGCCACAGCGGTTTT  |
| query    | ACATTAACAGTGACCGCCACCGACCCAGCAGGCAACGTTAGCCCGGCCACAGCGGTTTT  |

|          |                                                                |
|----------|----------------------------------------------------------------|
| template | ACTATCGTGGTCGATACCCCTTGCGCCAACGGTTCGCGTTATAAACCAGCATCGTTGATGAT |
| query    | ACTATCGTGGTCGATACCCCTTGCGCCAACGGTTCGCGTTATAAACCAGCATCGTTGATGAT |
| template | GTCCCGAACAATACCGGCGCCATTGGCAATGGACAATCGACCAATGACACACAGCCGACG   |
| query    | GTCCCGAACAACACCGGTGCCATTGGCAATGGACAATCGACCAATGACACACAGCCGACG   |
| template | CTCAACGGTACCGCGGAAGCCAACAGCGCGGTAAGTATCTTCGATAATGGCGCGCTGGTC   |
| query    | CTCAACGGTACTGCGGAAGCCAACAGCGCGGTAAGCATCTTCGATAATGGCGCGCTGGTC   |
| template | GCGACCGTGAACGCCAATGCCAGCGGCAACTGGAGCTGGACGCCAACCGCCTCGCTCGGC   |
| query    | GCGACCGTGAACGCCAATGCCAGCGGCAACTGGAGCTGGACGCCAACCGCCCGCTCGGC    |
| template | CAGGGAAGTCAATGCCTATAGCGTTAGCGCCGCCGATGCGGCTGGCAACGTTAGCGCCGCT  |
| query    | CAGGGAAGTCAATGCCTATAGCGTTAGCGCCGCCGATGCGGCTGGCAACGTTAGCGCCGCT  |
| template | TCGCCATCGACAACGATTATCGTGGATACCATTGCGCCCGCGCGCCCGGAACCTAGTC     |
| query    | TCGCCATCGATAACGATTATCGTGGATACCATTGCGCCCGCGCGCCCGGAACCTGGTC     |
| template | ATCAATGCTACCGGTAATCGGGTGACGGGCACCGCGGAAGCAGGCAGTACAGTGACGATT   |
| query    | ATCAATGCTACCGGTAATCGGGTGACGGGCACCGCGGAAGCAGGCAGTACAGTGACGATT   |
| template | ACCTCTGAGACTGGTGTGGTACTGGGAACCGCCACCGCCGACGGTACGGCAGCTTCACC    |
| query    | ACCTCTGAGACTGGTGTGGTACTGGGAACCGCCACCGCCGACGGTACAGGCAGCTTCACC   |
| template | GCCCACTCAGCCCGCGCAGACCAATGGTCAGCCGCTACTGGCATTGGCCAGGATAAA      |
| query    | GCCCACTCAGCCCGCGCAGACCAATGGTCAGCCGCTACTGGCATTGGCCAGGATAAA      |
| template | GCAGGCAACACTGGCATTGCCGCCGGATTTACCGCGCCGATACGCGCGTGCCGGAAGCG    |
| query    | GCAGGCAACACAGGCATTGCCGCCGGATTTACCGCGCCGATACGCGCGTGCCGGAAGCA    |
| template | CCGATCATCACCACGTAGTGGATGATGTGGGTATTTATACCGGCCTATCGCCAACGGT     |
| query    | CCGATCATCACCACGTAGTGGATGATGTGGGTATTTATACCGGCCTATCGCCAACGGC     |
| template | CAGGTCACTAATGACGCACAACCCACATTGAATGGTACCGCTCAGGCGGGCGCCACGGTG   |
| query    | CAGGTCACTAATGACGCACAACCCACATTGAATGGTACCGCTCAGGCGGGCGCCACGGTG   |
| template | AGCATTTATAACAACGGGGCGTGCTCGGCACCAACACGGCGAACGCCAGCGGAACTGG     |
| query    | AGCATTTATAACAACGGGGCGTGCTCGGCACCAACACGGCGAACGCCAGCGGAACTGG     |
| template | AGCTTTACCCCGACAGGCAATTTGACCGAAGGCAGCCACGCCTTACCAGCTACCGCAACT   |
| query    | AGCTTTACCCCGACAGGCAATTTGACCGAAGGCAGCCACGCCTTACCAGCTACCGCGACT   |
| template | AACGCCAACGGTACAGGCAGCGTCTCCACCGCCGCGACGGTGATTGTCGATACGCTGGCG   |
| query    | AACGCCAACGGTACAGGCAGCGTCTCCACCGCCGCGACGGTGATTGTCGATACGCTGGCG   |
| template | CCCGGTACGCCGTAGGTACGCTCAGCGCCGATGGCGGTTCACTTTCGGGACAGGCTGAG    |
| query    | CCCGGTACGCCGTAGGTACGCTCAGCGCCGATGGCGGTTCACTTTCGGGCTGGCAGAG     |
| template | GCAAACAGCACCGTAACCGTAACGCTGGCGGGGGGCGTGACGCTACCAACACCGCCGGC    |
| query    | GCAAACAGCACCGTAACCGTACGCTGACGGGGGGCGTGACGCTACCAACACCGCTGGC     |
| template | AGCAACGGCGCATGGTCTCTCACCTTGCCGACAAAACAAATTGAAGGTCAACTCATTAA    |
| query    | AGCAACGGCGCATGGTCTCTCACCTTGCCGACAAAACAAATTGAAGGTCAACTCATTAA    |
| template | GTGACGGCACTGACGCTGCGGGTAACGCCTCGGCACGTTAGGCATTACCGCGCGATT      |
| query    | GTGACGGCACTGACGCTGCGGGTAACGCCTCGGCACGTTAGGCATTACCGCGCGGTT      |
| template | CTGCCGCTGGCGGCAAGGGATAACATAACCAAGTCTTGATCTGACCTCTACCGCCGTACC   |
| query    | CTGCCGCTGGCGGCAAGGGATAACATAACCAAGTCTTGATCTGACCTCTACCGCCGTACC   |
| template | AGCACGCAAACTATTTCGGATTACGGCCTGCTGCTGGTTGGCGCGCTTGGCAATGTCGCC   |
| query    | AGCACGCAAACTATTTCGGATTACGGCCTGCTGCTGGTTGGCGCGCTTGGCAATGTCGCC   |
| template | TCGGTTTTGGGTAACGATACCGCTCAGGTTGAGTTCACCATTGCTGAAGGTGGTACGGGC   |
| query    | TCGGTTTTGGGTAACGATACCGCTCAGGTTGAGTTCACCATTGCTGAAGGTGGTACGGGC   |
| template | GACGTCACCATCGATGCCGCCGCAACGGGAATCGTGCTTTCGCTGCTCAGCACTCAGGAG   |
| query    | GACGTCACCATCGATGCCGCCGCAACGGGAATCGTGCTTTCGCTGCTCAGTACTCAGGAG   |

|                |                                                                                                                                      |
|----------------|--------------------------------------------------------------------------------------------------------------------------------------|
| template query | ATAGTGGTACAGCGCTATGACACCAGCCTCGGCACTGGACGACGATCGTCAACACCGCC<br>ATTGTGGTACAGCGCTAGACACCAGCCTCGGCGCTGGACGACGATCGTCAACACCGCC            |
| template query | GTGGCGACTTCGCGAATTTGCTTACCCTGACCGGGAGCGGCGTTACCCTGAACCTGAAC<br>CTTGGCGACTTCGCGAATTTGCTTACCCTGACCGGGAGCGGCGTTACCCTGAACCTGAAC          |
| template query | GGA CTGGGCGAAGGCCAGTACCGGGTACTCACTTATAACACCACTGCTGCTCGC ACCGGG<br>GGCCTGGGCGAAGGCCAGTACCGGGTACTCACTTATAACACCACTGCTGCTCGC TACGGG      |
| template query | TCATATACCAGCCTGGATGTCGATGTACACCAGACCAGCGCAGGTATTATTAGCGGGCCA<br>TCATATACCAGCCTGGATGTCGATGTACACCAGACCAGCGCAGGTATTATTAGCGGGCCA         |
| template query | ACCATCAGTACCGGCAACGTATGGCTGATGATACCGCGCCGACGGGCACCACGGTCACC<br>ACCATCAGTACCGGCAACGTATGGCTGATGATACCGCGCCGACGGGCACCACGGTCACC           |
| template query | GCCATCACCAACGCCAACGGCGTCAGTACGCCGGTCGGCGCGGGCGGCGTGGATATCCTG<br>GCCATCACCAACGCCAACGGCGTCAGTACGCCGGTCGGCGCGGGCGGCGTGGATATCCTG         |
| template query | GGGCAATACGGCACGCTGCACATTAATCAGGATGGCAGTTACACCTACACGCTGACTAAG<br>GGGCAATACGGCACGCTGCACATTAATCAGGATGGCAGTTACACCTACACGCTGACTAAG         |
| template query | CCCACGGCGGGATACGGACATAAAGAGAGCTTCACCTACACCATACCCAGAATGGCGTC<br>CCCACGGCGGGATACGGACATAAAGAGAGCTTCACCTACACCATACCCAGAATGGCGTC           |
| template query | GGTAGCAGCGCCGCGCAACTGGTTATTAATTTGGGTCCGCGCCTGTACCGGGCAGCGTG<br>GGTAGCAGCGCCGCGCAACTGGTTATTAATTTGGGTCCGCGCCTGTACCGGGCAGCGTG           |
| template query | ATAGCGACAGACAATAACGCCCTCGCTGGTCTTTGATACTCACGTTAGCTACGTCAACAAC<br>ATAGCGACAGACAATAACGCCCTCGCTGGTCTTTGATACTCACGTTAGCTACGTCAACAAC       |
| template query | GGCCCCTCGACACAAAGCGGCGTCACGGTATTAAGCGTCGGACTTGGTAATGTACTGAAC<br>GGCCCCTCGACACAAAGCGGCGTCACGGTATTAAGCGTCGGACTTGGTAATGTACTGAAC         |
| template query | GCGAATCTGCTTGATGATGACTAATCCGATCATCTTTAACGTTGAAGAAGGCGCTACG<br>GCGAATCTGCTTGATGATGACTAATCCGATCATCTTTAACGTTGAAGAAGGCGCTACG             |
| template query | CGAACCATGACGTTACAGGGAACCGTCGGCGGCGTCTCACTGGTTTCCACGTTTCGATCTG<br>CGAACCATGACGTTACAGGGAACCGTCGGCGGCGTCTCACTGGTTTCCACGTTTCGATCTG       |
| template query | TACGTTTATCGCTTCAACGATGCCATTCAACAATATGAGCAGTTCCGGGTG CAAAAGGGC<br>TACGTTTATCGCTTCAACGATGCCATTCAACAATATGAGCAGTTCCGGGT CAAAAGGGC        |
| template query | TGGATTAAACACCTGCTGTTAGCCGGACAGTCCAGCCGCTGACCTGACGTTGCCTGGC<br>TGGATTAAACACCTGCTGTTAGCCGGACAGTCCAGCCGCTGACCTGACGTTGCCTGGC             |
| template query | GGCGAATACTTGTTCTGTGCTGAATACCGCCAGCGGCATTAGCGTCCTCACTGGCTATACG<br>GGCGAATACTTGTTCTGTGCTGAATACCGCCAGCGGCATTAGCGTCCTCACTGGCTATACG       |
| template query | TTGGCGATTTCCAGGACCACCTATGCCGTTGACAGTATACCGCCAACACCACCGGC<br>TTGGCGATTTCCAGGACCACCTATGCCGTTGACAGTATACCGCCAACACCACCGGC                 |
| template query | AACGTA CTGACCAATGATGTG C C C C TACGGACGCCCTCCTCACTGAAGTAAACGGCGTG<br>AACGTA CTGACCAATGATGTG C C C TACGGACGCCCTCCTCACTGAAGTAAACGGCGTG |
| template query | GCGATTGCGGCACCGGCACGACGGAGGTAAATGGGCTGTATGGCTCGCTCATCATTGAC<br>GCGATTGCGGCACCGGCACGACGGAGGTAAATGGGCTGTATGGCTCGCTCATCATTGAC           |
| template query | GCAAGAGGCAACTATACCTACACGCTGAAGAACGGCGTCGGCGCCGACAGCATTAAACG<br>GCAAGAGGCAACTATACCTACACGCTGAAGAACGGCGTCGGCGCCGACAGCATTAAACG           |
| template query | CCGGACAGCTTTATCTATACGCTCAAAGCGCCAAACGGCGATACCGATACGGCCTCGCTC<br>CCGGACAGCTTTATCTATACGCTCAAAGCGCCAAACGGCGATACCGATACGGCCTCGCTC         |
| template query | AATATCACGCCAACCGCCAGGGCGCTGGATGCGATTAAATGATGTGACGATACCCCTAGC<br>AATATCACGCCAACCGCCAGGGCGCTGGATGCGATTAAATGATGTGACGATACCCCTAGC         |
| template query | GTCGCCACGCTTCAGGATACCGCTGCCTGGCTGGACTCCAGCGTCGGCAGCGCCAGTTGG<br>GTCGCCACGCTTCAGGATACCGCTGCCTGGCTGGACTCCAGCGTCGGCAGCGCCAGTTGG         |
| template       | GGGCTACTCGGCAATCGGGCAGCGGGAGCGGCACCTTTGACGTTGCAACGGGCACCGTA                                                                          |

|          |                                                                 |
|----------|-----------------------------------------------------------------|
| query    | GGGCTACTCGGCAAAATCGGGCAGCGGGAGCGGCACCTTTTGACGTTTGCAACGGGCACCGTA |
| template | CTTAAAGGCGCGTCACTGGTCTTTGATGTCTCCACGCTCATTACGCTGGGCAATCTGAAT    |
| query    | CTTAAAGGCGCGTCACTGGTCTTTGATGTCTCCACGCTCATTACGCTGGGCAATCTGAAT    |
| template | ATTAGCTGGGCCATTACAGGAGAACGGAAACCGTCATACGCAACGGAACCGTCCCGTGGCG   |
| query    | ATTAGCTGGGCCATTACAGGAGAACGGGACCGTCATACGCAACGGAACCGTCCCGTGGCG    |
| template | AATATCACGCTGGGCAGCGCAGCGGTGACCGTCAACCTGAGCGGCCTGGAGCTGGATGCC    |
| query    | AATATCACGCTGGGCAGCGCAGCGGTGACCGTCAACCTGAGCGGCCTGGAGCTGGATGCC    |
| template | GGAACGTACACGCTTAACCTTTACCGGCACCAATACCTGGCCGGGGCGGCGACAATCACG    |
| query    | GGAACGTACACGCTTAACCTTTACCGGCACCAATACCTGGCCGGGGCGGCGACATCACG     |
| template | CCACGCGTCATCGGCACCACCGTCGATCTGGATAATTTTGAAACGTCCGGAACGCATACC    |
| query    | CCACGCGTCATCGGCACCACCGTCGATCTGGATAATTTTGAAACGTCCGGAACGCATACC    |
| template | GTTCTCGGCAATATTTTGACGGCAGCGACGCGCGGGGGCGATGGATCAGCTTAATACG      |
| query    | GTTCTCGGCAATATTTTGACGGCAGCGACGCGCGGGGGCGATGGATCAGCTTAATACG      |
| template | GTGAATACTCGCTGAGCATTAGCGGGTATAACGGCAGCGCCGCCACGCTGGACGCCGCG     |
| query    | GTGAATACCGCTGAGCATTAGCGGGTATAACGGCAGCGCCGCCACGCTGGACGCCGCG      |
| template | GCGAATACCACCAGCGCCACGATTACGGGACATTACGGCACATTGCAAATTAACCTCGAT    |
| query    | GCGAATACCACCAGCGCCACGATTACGGGACATTACGGCACATTGCAAATTAACCTTGAT    |
| template | GGCGCTTACACCTACACCTGAATAATGGCGTCGCGATGTCGTCCATCACCAGTAAAGAG     |
| query    | GGCGCTTACACCTACACCTGAATAATGGCGTCGCGATGTCGTCCATCACCAGTAAAGAG     |
| template | GTCTTTACCTATCAACTGGATGACAAGATAGGTCATACGGATAGCGCCACATTGACCATT    |
| query    | GTCTTTACCTATCAACTGGATGACAAGATGGGTCATACGGATAGCGCCACATTGACCATT    |
| template | GATATGGCGCCCAAATCGTCAGTACCAACCAAACGATGTTCTATCGGCTCCGCCTAT       |
| query    | GATATGGCGCCCAAATCGTCAGTACCAACCAAACGATGTTCTATCGGCTCCGCCTAT       |
| template | GGCGATACGCTGATTTACACCTGTTAAACGGCGCGGACGCGACCGGCGGCAACGGCGCC     |
| query    | GGCGATACGCTGATTTACACCTGTTAAACGGCGCGGACGCGACCGGCGGCAACGGCGTC     |
| template | GATCGCTGGCAAAACTTCTCCACCGCGCAGGGCGACAAGATCGATATCCACGAACGTCTG    |
| query    | GATCGCTGGCAAAACTTCTCCACCGCGCAGGGCGACAAGATCGATATCCACGAACGTCTG    |
| template | ACCGGCTGGGATCACCAGGCGGCGACGCTAGGTAACCTTTGTTCAGGTTCATACCAGCGGC   |
| query    | ACCGGCTGGGATCACCAGGCGGCGACGCTAGGTAACCTTTGTTCAGGTTCATACCAGCGGC   |
| template | GCCAATACGGTGATATCCGTGATCGCGACGGCGCCGGCAGCGCGTTTAAATCAACTGAC     |
| query    | GCCAATACGGTGATATCCGTGATCGCGACGGCACCGGCAGCGCGTTTAAATCAACCGAC     |
| template | CTTGTCACTTTGGAGAATGTGCAGCTCACGCTAAATGATCTGTTGCAGAACAACCACTG     |
| query    | CTTGTCACTCTGGAGAATGTGCAGCTCACGCTAAATGATCTGTTGCAGAACAACCACTG     |
| template | ATAACCGGCGGTTGAT-AAAAAGCCCCGAACGCCACGACGTTTCGGGGCAACAAGCGGTGA   |
| query    | ATAACCAAGCGGTTGATAAAAAAGCCCCGAACGCCACGACGTTTCGGGGCAACAAGCGGTGA  |
| template | TATTTAAAAGGGATAAACTATGGGAAGAGTCGCGCCTGTCGCCATCGTACTGGCATTGTC    |
| query    | TATTTAAAAGGGATAAACTATGGGAAGAGTCGCGCCTGTCGCCATCGTACTGGCATTGTC    |
| template | TTTGTTTCATCACCAGCCCCGGGGCGCAGAAGCGCTGCCAATGATTACATCCGAAGGATT    |
| query    | TTTGTTTCATCACCAGCCCCGGGGCGCAGAAGCGCTGCCAATGATTACATCCGAAGGATT    |
| template | AGCAACGGACCAGATGCTTCCTTCGCTGGATGGCTCCGCCGCTGAGTTGCCGCTCAGCGC    |
| query    | AGCAACGGACCAGATGCTTCCTTCGCTGGATGGCTCCGCCGCTGAGTTGCCGCTCAGCGC    |
| template | CGCCGCGCCGGGCAACCTGACGCTCAATGACGCGGTCAATCGCGCCGTTAACTGGCATCC    |
| query    | CGCCGCGCCGGGCAACCTGACGCTCAATGACGCGGTCAATCGCGCCGTTAACTGGCATCC    |
| template | TTCTATTTCGGAAGCGCTCGGCAAACCTGCTCGCACAGAATGAACAAATAGAGGTCGCCAA   |
| query    | TTCTATTTCGGAAGCCATCGGCAAACCTGCTCGCACAGAATGAACAAATAGAGGTCGCCAA   |
| template | ATCGAAATATTATCCGCAAGTCAGCGCTGGCGTGAACAATGGGTACAGCAATACCTACAC    |
| query    | ATCGAAATATTATCCGCAAGTCAGCGCTGGCGTGAACAATGGGTACAGCAATACCTACAC    |

|          |                                                               |
|----------|---------------------------------------------------------------|
| template | CGATCACGGGTATAGCCCTCGCTGGTGCTGTCGGTATCGCAAATGCTTTATGACTTCGG   |
| query    | CGATCACGGGTATAGCCCTCGCTAGTGCTGTCGGTATCGCAAATGCTTTATGACTTCGG   |
| template | CAAAGTGGCAAGCCAGGTTTCGCGCCGAAACCGCAGGCGCAGCAGCAACAGGCCAACGT   |
| query    | CAAAGTGGCAAGCCAGGTTTCGCGCCGAAACCGCAGGCGCAGCAGCAACAGGCCAATGT   |
| template | GTTGCTCAGTATTGATACCGTCGCGCACGAAACCGCCAACGCCATTGTACAAACGCAGAG  |
| query    | GTTGCTCAGTATTGATACCGTCGCGCACGAAACCGCCAACGCCATTGTACAAACGCAGAG  |
| template | CTGGCAGCAAATGGTAGAAGCGGCGGAAGAACAGCTCGTCGCGCTGGACAGCATCGGTAA  |
| query    | CTGGCAGCAAATGGTAGAAGCGGCGGAAGAACAGCTCGTCGCGCTGGACAGCATCGGTAA  |
| template | ACTTATCCGGCAGCGCAGCGATGAAGGCGCTACGTCGCTATCTGACGTGGTGCAAACCGA  |
| query    | ACTTATCCGGCAGCGCAGCGATGAAGGCGCTACGTCGCTCTCTGACGTGGTGCAAACCGA  |
| template | AGCCAGAATCGAATCCGCCGCTCGCAACTGGCGCAGTATCAGGCCAATCTCGACAGTGC   |
| query    | AGCCAGAATCGAATCCGCCGCTCGCAACTGGCGCAGTATCAGGCCAATCTCGACAGTGC   |
| template | GAAAGCCTCACTGATGAGCTGGCTGGGCTGGAATTCGCTTAACGGCATCAATAATGACTT  |
| query    | GAAAGCCTCACTGATGAGCTGGCTGGGCTGGAATTCGCTTAACGGCATCAATAATGACTT  |
| template | CCCGGCGAAACTCGCTCGCAGCTGTGAGACAGCGACCCCGAAGATCGCTGGTGCCCGC    |
| query    | CCCGGCGAAACTTGCTCGCAGCTGTGAGACGGCGACTCCCGACGATCGACTGGTGCCCGC  |
| template | GGTACTGGCCGCTGGGCGCAGGCCAACGTTGCGCGGGCGAATCTGGACTATGCCAGTGC   |
| query    | GGTACTGGCCGCTGGGCGCAGGCCAACGTTGCGCGGGCGAATCTGGACTATGCCAGCGC   |
| template | GCAAATGACGCCGACGATTTTCGCTCGAACCTTCTGTACAACATTATCTTAATGACAAATA |
| query    | GCAAATGACGCCGACGATTTTCGCTCGAACCTTCTGTACAACATTATCTTAATGATAAATA |
| template | TCCAGTCATGAAGTGCTGGATAAAACCCAGTATTCCACCTGGGTAAAAGTTGAGATGCC   |
| query    | TCCAGTCATGAAGTGCTGGATAAAACCCAGTATTCCACCTGGGTAAAAGTTGAGATGCC   |
| template | GCTTTATCAGGGCGGAGGGCTGACTGCCCGACGCAACGCCAGCCATGCGGTAGACGC     |
| query    | GCTTTATCAGGGCGGAGGGCTGACTGCCCGACGCAACGCCAGCCATGCGGTAGACGC     |
| template | GGCTCAGTCGACCATTAGCGCACCCGGCTTGATGTCCGCCAGAACTGATGGAGGCGCG    |
| query    | GGCTCAGTCGACCATTAGCGCACCCGGCTTGATGTCCGCCAGAACTGATGGAGGCGCG    |
| template | CAGCCAGGCAATGAGTCTTGCCAGCGCGTTACAAATCCTTCGTCGGCAACAGCAGCTTAG  |
| query    | CAGCCAGGCAATGAGTCTTGCCAGCGCGTTACAAATCCTTCGTCGGCAACAGCAGCTTAG  |
| template | CGAACGCACGCGCGAACTGTATCAGCAGCAATACCTTGACCTCGGTTCCCGCCGTTGCT   |
| query    | CGAACGTACGCGCGAACTGTATCAGCAGCAATACCTTGACCTCGGTTCCCGCCGCTGCT   |
| template | CGACGTGCTTAATGCGGAGCAGGAAGGTTTACCAGGCGCGTTTTGCCGAACGCAAAACGGA |
| query    | CGACGTGCTTAATGCGGAGCAGGAAGGTTTACCAGGCGCGTTTTGCCGAACGCAAAACGGA |
| template | AAGCCAGTTGCATCAGTTCAACTGAACTATCTGTATAACACCGGCGCGCTTCGTCAGGC   |
| query    | AAGCCAGTTGCATCAGTTCAACTGAACTGTCTGTATAACACCGGCGCGCTTCGTCAGGC   |
| template | GTTTCGCTTAAATCATCGCAGCATTCAATCCGTGGAGATCCAGCCATGACCCGCGCCGCC  |
| query    | GTTTCGCTTAAATCATCGCAGCATTCAATCCGTGGAGATCCAGCCATGACCCGCGCCGCC  |
| template | CCCGATGTAGAAGAGGTACTCAGTGAGCGCGCGCTAAGCCAATGGGCGCAGGCCATCAGC  |
| query    | CCCGATGTAGAAGAGGTACTCAGTGAGCGCGCGCTAAGCCAATGGGCGCAGGCCATCAGC  |
| template | CATGTCGCCGGTCATTATCGCGTTGCCTGTTCTCCCGTTCAATTAGGCCAACGCCCCG    |
| query    | TATGTCGCCGGTCATTATCGCGTTGCCTGTTCTCCCGTTCAATTAGGCCAACGCCCCG    |
| template | TGGTTTAGGGGTAAAAGCAGAACGACCGCCTTAACGCAGCTCGCGCGCAGGCGGGTTTA   |
| query    | TGGCTTAGGGGTAAAAGCAGAACGACCGCCTTAACGCAGCTCGCGCGCAGGCGGGTTTA   |
| template | TCCTTTCATGCGCCGGACATAGACAAAACGGCATTAGTCAGTGGCATTGCCGTTGGTT    |
| query    | TCCTTTCATGCGCCGGACATAGACAAAACGGCATTAGTCAGTGGCATTGCCGTTGGTT    |
| template | GTCGAGCTCCGGGACGGGCAGTTATTGGTCATCGAACATGTTAATGGCGAAGATGCGGTA  |
| query    | GTCGAGCTCCGGGACGGGCAGTTATTGGTCATCGAACATGTTAATGGCGAAGAGGCGGTA  |

|          |                                                               |
|----------|---------------------------------------------------------------|
| template | GACGTTTTTGTGATTGAAGAAGAGGGTCAGCGTAACCGCCTGACGCTCAGCGAGTTATTG  |
| query    | GACGTTTTTGTGATTGAAGAAGAGGGTCAGCGTAACCGCCTGACGCTCAGCGAGTTATTG  |
| template | CCGGAGATCCTCTATGTTGCCGCGCTACGCCGCTATCGGCGCTCAAGGATAGCCGCGTC   |
| query    | CCGGAGATCCTCTATGTTGCCGCGCTACGCCGCTATCGGCGCTCAAGGATAGCCGCGTC   |
| template | GACCGCTATATCTCCCGCTTTAAACCCGACTGGATGCGCGAGCTGGTTCTGCAGGATATT  |
| query    | GACCGCTATATCTCCCGCTTTAAACCCGACTGGATGCGCGAGCTGGTTCTGCAGGATATT  |
| template | CGCCCTTATTTACCGTAATGGTCGCCGCTTTCTGATTAACGTGCTGTCTCTGGCCGGG    |
| query    | CGCCCTTATTTACCGTAATGGTCGCCGCTTTCTGATTAACGTGCTGTCTCTGGCCGGG    |
| template | ATTGTGTTCTCTATGCAGGTTTACGATCGGGTGATCCCCGCTCAGTCATATCCTACCCTG  |
| query    | ATTGTGTTCTCTATGCAGGTTTACGATCGGGTGATCCCCGCTCAGTCATATCCTACCCTG  |
| template | TACGTGCTCTCCTTCGGCGTGCTGGTAGCGGTGCTGTTTCGGTTTTCTGCTGCGTGAAGCG |
| query    | TACGTGCTCTCCTTCGGCGTGCTGGTAGCGGTGCTGTTTCGGTTTTCTGCTGCGTGAAGCG |
| template | CGTACGCACATTATGGACGTGCTCGGTAACGCGCCGATATGCGCATTTCGATCGGGTA    |
| query    | CGTACGCACATTATGGACGTGCTCGGTAACGCGCCGATATGCGCATTTCGATCGGGTA    |
| template | TTCGGTCATGCGTTAAGGCTGCGCAACAGCGCTATCCCCGTTCCACCGCAGTTTTATC    |
| query    | TTCGGTCATGCGTTAAGGCTGCGCAACAGCGCTATCCCCGTTCCACCGCAGTTTTATC    |
| template | TCGCAGTTACGTGAAGTGGAGCAGATCCGCGAGATGATTACCTTTCAACGCTGGCGACC   |
| query    | TCGCAGTTACGTGAAGTGGAGCAGATCCGCGAGATGATTACCTTTCAACGCTGGCGACC   |
| template | ATTGTCGATCTGCCTTTCTTTTCTGTTTATGATAGTCTTGGCGATTATTGCCCCACCG    |
| query    | ATTGTCGATCTGCCTTTCTTTTCTGTTTATGATAGTCTTGGCGATTATTGCCCCACCG    |
| template | CTGGCATGGATAGCGCCCGTGCGGCTCTGCTGATGATCCTGCCGGGCGTCGACTGCAA    |
| query    | CTGGCATGGATAGCGCCCGTGCGGCTCTGCTGATGATCCTGCCGGGCGTCGACTGCAA    |
| template | AAAAAACTGGCTGTCTCGCCAACCAGGCCGCCACGAAGCGACGCTACGCAATGCGGTC    |
| query    | AAAAAACTGGCTGTCTCGCCAACCAGGCCGCCACGAAGCGACGCTACGCAATGCGGTC    |
| template | TTGGTCGAAAGCGTTCAGGGGCTGGAAGATATTAACCTGATGCAGGCGGAGAACCCTTT   |
| query    | TTGGTCGAAAGCGTTCAGGGGCTGGAAGATATTAACCTGATGCAGGCGGAGAACCCTTT   |
| template | CTTCAGCAGTGGAATAGCTATATCCGTATTACCGGCGAGTCGGGTCTACGCACCCGCAA   |
| query    | CTTCAGCAGTGGAATAGCTATATCCGTATTACCGGCGAGTCGGGTCTACGCACCCGCAA   |
| template | CTCACGCAAAGGCTTATCAGTTGGGGGATGTCGGTACAAAGTCTGGTGTATGCCGAGTG   |
| query    | CTCACGCAAAGGCTTATCAGTTGGGGGATGTCGGTACAAAGTCTGGTGTATGCCGAGTG   |
| template | ATTATGTTTCGGCGCGCCGATGGTCATTGAAGGCAGTATGACTACCGGCGCCGTGGTCGCC |
| query    | ATTATGTTTCGGCGCGCCGATGGTCATTGAAGGCAGTATGACTACCGGCGCCGTGGTCGCC |
| template | GCGTCGATGCTCGGCTCACGGATGATCGCGCCAATGGCTAACCTGTGCGGCGTGCTGGCG  |
| query    | GCGTCGATGCTCGGCTCACGGATGATCGCGCCAATGGCTAACCTGTGCGGCGTGCTGGCG  |
| template | CGCTGGCAGCAGGTGAAAGCGGCGAAGATGGGTCTCGACAACATTATGCAACTGCCCACT  |
| query    | CGCTGGCAGCAGGTGAAAGCGGCGAAGATGGGTCTCGACAACATTATGCAACTGCCCACT  |
| template | GAGACACAGCATGACGATAGCCTGATACACGCGACATCCTCCACGGGCATTACCTCTTT   |
| query    | GAGACACAGCATGACGATAGCCTGATACACGCGACATCCTCCACGGGCATTACCTCTTT   |
| template | GAAAACGCTCAGTTTCGTTACCATAACGACGATCAACGCATACCGCTGCGCCTCGTGCGT  |
| query    | GAAAACGCTCAGTTTCGTTACCATAACGACGATCAACGCATACCGCTGCGCCTCGTGCGT  |
| template | CTGGAGATCATGCCAGGCGAGCGGATTGCGATACTGGGGCGTAACGGTGCGGGTAAATCC  |
| query    | CTGGAGATCATGCCAGGCGAGCGGATTGCGATACTGGGGCGTAACGGTGCGGGTAAATCC  |
| template | ACACTTTTACAGGCGATGGCGGGCGGCCTGGAGATGATTACGGGAGATGCCCGGCTTGAT  |
| query    | ACACTTTTACAGGCGATGGCGGGCGGCCTGGAGATGATTACGGGAGATGCCCGGCTTGAT  |
| template | AATCTCAGCTTGTGCGACATCGATATGGCGGATTTACGCCGCAACATCGGCTTTCTTAGC  |
| query    | AATCTCAGCTTGTGCGACATCGATATGGCGGATTTACGCCGCAACATCGGCTTTCTTAGC  |
| template | CAGAACGCGCGGCTTTTCTTCGGCACCCCTACGAGAGAACCTGACGCTCGGCGCGCCGAC  |

|          |                                                                 |
|----------|-----------------------------------------------------------------|
| query    | CAGAACGCGCGCTTTTCTTCGGCACCTACGAGAGAACCTGACGCTCGGCGCGCCGCAC      |
| template | GCCAACGATGAACAGATTTTTGACGCGCTCGAAGTCAGCGCGCGCGCTTCTCGTCAGG      |
| query    | GCCAACGATGAACAGATTTTTGACGCGCTCGAAGTCAGCGCGCGCGCTTCTCGTCAGG      |
| template | CGGCTGGCAAAAGGGTTGGATCATCCATTATGGAGGGTGGTAACGGCCTGTCCGGCGGG     |
| query    | CGGCTGGCAAAAGGGTTGGATCATCCATTATGGAGGGTGGTAACGGCCTGTCCGGCGGG     |
| template | CAGCGTCAGTCCCTGTTGCTGGCGAGAATGCTGCTGCGCTCCCCAATATTGTGCTACTT     |
| query    | CAGCGTCAGTCCCTGTTGCTGGCGAGAATGCTGCTGCGCTCCCCAATATTGTGCTACTT     |
| template | GACGAACCCAGCGCCTCGCTGGACGAGCATACGGAACGAGAGTTTATTACGCGTTACAT     |
| query    | GACGAACCCAGCGCCTCGCTGGACGAGCATACGGAACGAGAGTTTATTACGCGTTACAT     |
| template | CAGTGGCTTGGCAACCGTACCCTGGTCGTCGCAACGCACCGGGTACCAATACTGGAGCTG    |
| query    | CAGTGGCTTGGCAACCGTACCCTGGTCGTCGCAACGCACCGGGTACCAATACTGGAGCTG    |
| template | GTTGAGCGTGTGCTTGCTGCTGAAAGAAGGACAACCTGGTGATGGACGCGCCAAAAGCGCAG  |
| query    | GTTGAGCGTGTGCTTGCTGCTGAAAGAAGGACAACCTGGTGATGGATGCGCCAAAAGCGCAG  |
| template | GCGCTTAACGCGGATCGGATGCAAAGTCACCGTCGGGAGTGAAGAAAAATGAAAAATCAATCA |
| query    | GCGCTTAACGCGGATCGGATGCAAAGTCACCGTCGGGAGTGAAGAAAAATGAAAAATCAATCA |
| template | GCATGATGCCGCGATGGACGATTTTCGATATTACGCGTGAACGGCGTTTTCCGGCGCGGG    |
| query    | GCATGATGCCGCGATGGACGATTTTCGATATTACGCGTGAACGGCGTTTTCCGGCGCGGG    |
| template | TCGTATTGTTCTGATCTGCTCACTGTTATTTCTCATTCTCGGCATCTGGGCGTGGTTTGG    |
| query    | TCGTATTGTTCTGATCTGCTCACTGTTATTTCTCATTCTCGGCATCTGGGCGTGGTTTGG    |
| template | CCGACTGGATGAGGTTTCCACCGGCAACGGGAAAGTAATCCCCAGTTCACGCGAACAGGT    |
| query    | CCGACTGGATGAGGTTTCCACCGGCAACGGGAAAGTGATCCCCAGTTCACGCGAACAGGT    |
| template | TCTGCAGTCGCTGGATGGCGGCATTCTGGCGCAGTTGACGGTGCGGGAAGGCGACAGAGT    |
| query    | TCTGCAGTCGCTGGATGGCGGCATTCTGGCGCAGTTGACGGTGCGGGAAGGCGACAGAGT    |
| template | TCAGGCTAACCAGATTGTCGCCCCAGCTTGATCCGACGCGTCTGGCGTCCAATGTTGGTGA   |
| query    | TCAGGCTAACCAGATTGTCGCCCCAGCTTGATCCGACGCGTCTGGCGTCCAATGTTGGTGA   |
| template | AAGTGCGGCAAAATATCGCGCTTCACTCGCCTCCAGCGCACGGTTAACCGCGGAAGTCAG    |
| query    | AAGTGCGGCAAAATATCGCGCTTCACTCGCCTCCAGCGCACGGTTAACCGCGGAAGTCAG    |
| template | CGACTTACCTCTCGCCTTCCCCGCTGAGCTGAACGGCTGGCCGGATCTGATTGCCGCGAGA   |
| query    | CGACTTACCTCTCGCCTTCCCCGCTGAGCTGAACGGCTGGCCGGATCTGATTGCCGCGAGA   |
| template | GACGCGTCTCTATAAAAGCCGCGCGCGCAGCTGGCCGATACCGAAGCCGAGCTACGGGA     |
| query    | GACGCGTCTCTATAAAAGCCGCGCGCGCAGCTGGCCGATACCGAAGCCGAGCTACGGGA     |
| template | TGCGCTGGCGTCGGTTAATAAAGAGCTGACCATTACCCAGCGGCTGGAGAAAAGCGGCGC    |
| query    | TGCGCTGGCGTCGGTTAATAAAGAGCTGACCATTACCCAGCGGCTGGAGAAAAGCGGCGC    |
| template | GGCCAGTCATGTTGAAGTGCTACGCCTGCAACGACAAAAAAGCGATTTAGGCTTAAAAAT    |
| query    | GGCCAGTCATGTTGAAGTGCTACGCCTGCAACGACAAAAAAGCGATTTAGGCTTAAAAAT    |
| template | TACCGATCTGCGCTCACAATATTATGTGCAGGCACGCGAAGCGTTATCAAAAGCGAACGC    |
| query    | TACCGATCTGCGCTCACAATATTATGTGCAGGCACGCGAAGCGTTATCAAAAGCGAACGC    |
| template | TGAGGTCGATATGCTCTCCGCCATTTTAAAAGGACGCGAGGATCCGTACCCCGCCTTAC     |
| query    | TGAGGTCGATATGCTCTCCGCCATTTTAAAAGGACGCGAGGATCCGTACCCCGCCTTAC     |
| template | CATACGTTCCGCCGGTACGCGGATTGTTAAAAATATCCAGGTCACGACGATTGGCGGCGT    |
| query    | CATACGTTCCGCCGGTACGCGGATTGTTAAAAATATCCAGGTCACGACGATTGGCGGCGT    |
| template | GATCCCGCTAACGGTGAGATGATGGAGATAGTGCCGGTAGACGATCGTCTGTTGATTGA     |
| query    | GATCCCGCTAACGGTGAGATGATGGAGATAGTGCCGGTAGACGATCGTCTGTTGATTGA     |
| template | AACCCGCCTTTTCGCCGCGTGATATCGCCTTTATTTCATCCCGCCAACGCGCATTGGTTAA   |
| query    | AACCCGCCTTTTCGCCGCGTGATATCGCCTTTATTTCATCCCGCCAACGCGCATTGGTTAA   |
| template | AATTACTGCTTACGATTACGCCATTTACGGCGGGCTTGACGGCGTGGTGGAGACCATTTTC   |
| query    | AATTACTGCTTACGATTACGCCATTTACGGCGGGCTTGACGGCGTGGTGGAGACCATTTTC   |



|          |                                                               |
|----------|---------------------------------------------------------------|
| template | ACCGGATACCATTTCAGGATAAAGTGAAACCGGAAATTTTCTACTATCGCGT6TTTATCCG |
| query    | ACCGGATACCATTTCAGGATAAAGTGAAACCGGAAATTTTCTACTATCGCGTATTATCCG  |
| template | CACCCACCAGGACTATCTACAAAATAAATCAGGACGCCGTTTTTCGATTGTTCCAGGCAT  |
| query    | CACCCACCAGGACTATCTACAAAATAAATCAGGACGCCGTTTTTCGATTGTTCCAGGCAT  |
| template | GATCGCCACGGTGGATATCAAAACCGGTGAAAAAACCATTTGTCGACTATTTAATCAAACC |
| query    | GATCGCCACGGTAGATATCAAAACCGGTGAAAAAACCATTTGTCGACTATTTAATCAAACC |
| template | GTTTAATCGCGCGAAAGAAGCGCTGCGCGAGCGGTAA                         |
| query    | GTTTAATCGCGCGAAAGAAGCGCTGCGCGAGCGGTAA                         |

Input Files: 69M\_cons\_1.fasta

Results as textResults tsvHits in genome seqsSPI sequences

Support

Scientific problems

Technical problems

Copyright DTU 2011 / All rights reserved  
Center for Genomic Epidemiology, DTU, Kemitorvet, Building 204, 2800 Kgs. Lyngby, Denmark  
Contact: Vibeke Dybdahl Hammer, Telephone: +45 3588 6420, E-mail: vdha@food.dtu.dk  
Funded by: The Danish Council for Strategic Research  
Last modified May 22, 2012 11:08:01 GMT
